# Supplementary material for: A novel methionine metabolism-related signature predicts prognosis and immunotherapy response in lung adenocarcinoma
Source: publisher site journal article supplement (doi:10.18632/aging.204687), 2023-05-02
Supplement: Supplementary file [file aging-v15i9-204687-supplementary-material-SD9.pdf]

**Supplementary Table 9. A total of 23 differentially expressed genes (DEGs) that represented the essential distinguishing index of the three subtypes.**

| <b>Symbol</b> |
|---------------|
| BHMT2         |
| DNMT3B        |
| EZH2          |
| SUV39H2       |
| CBS           |
| MARS          |
| SUV39H1       |
| HNMT          |
| DNMT3A        |
| SETD8         |
| MTHFD1        |
| MAT2B         |
| AHCYL2        |
| MSRA          |
| MSRB3         |
| CDO1          |
| DNMT1         |
| PRMT1         |
| SMS           |
| GNMT          |
| CHDH          |
| AHCY          |
| MTR           |

**Supplementary Table 10. Univariate Cox regression result of 5 subtype-related genes in the TCGA LUAD cohort.**

| <b>Symbol</b> | <b>HR</b>         | <b>HR.95L</b>     | <b>HR.95H</b>     | <b>pvalue</b>        |
|---------------|-------------------|-------------------|-------------------|----------------------|
| HNMT          | 0.852339925056659 | 0.735738238752324 | 0.987420946174514 | 0.0332858745036553   |
| MTHFD1        | 1.55298619967208  | 1.20824258678777  | 1.99609429657984  | 0.000588148762962725 |
| SMS           | 1.59997380500189  | 1.28972307343853  | 1.98485723750545  | 0.00001925742348073  |
| GNMT          | 0.770653673199567 | 0.691730063992243 | 0.85858214776486  | 2.29091935009681E-06 |
| CHDH          | 0.87119042083928  | 0.770256029426023 | 0.985351260317546 | 0.0281743210599072   |
