# Supplementary material for: A novel methionine metabolism-related signature predicts prognosis and immunotherapy response in lung adenocarcinoma
Source: Aging (Albany NY). 2023 May 2;15(9):3498–523. doi: 10.18632/aging.204687 (PMC10449287; doi:10.18632/aging.204687)
Supplement: Supplementary Table 1 [file aging-15-204687-s002.xlsx]

## Sheet: Table S1
SupplementaryTable 1. LUAD data sets utilized in the study.
SAMPLE_ID	GSE	Condition	Age	Gender	Race	Smoker	Clinical.parameters	Histology	T_Stage	N_Stage	M_Stage	TNM_Stage	Substage	OS_MONTHS	OS_STATUS	EFS_MONTHS	EFS_STATUS
AD10	ca00153	Tumor						adenocarcinoma						84.1	1
AD2	ca00153	Tumor						adenocarcinoma						91.8	0
AD3	ca00153	Tumor						adenocarcinoma						93.7	0
AD5	ca00153	Tumor						adenocarcinoma						108.2	0
AD6	ca00153	Tumor						adenocarcinoma						34.6	1
AD7	ca00153	Tumor						adenocarcinoma						68.1	0
AD8	ca00153	Tumor						adenocarcinoma						34.2	0
L01	ca00153	Tumor						adenocarcinoma						47	0
L02	ca00153	Tumor						adenocarcinoma						39.1	0
L04	ca00153	Tumor						adenocarcinoma						45.8	1
L05	ca00153	Tumor						adenocarcinoma						110.6	0
L06	ca00153	Tumor						adenocarcinoma						91.9	0
L08	ca00153	Tumor						adenocarcinoma						107.9	0
L09	ca00153	Tumor						adenocarcinoma						98.7	0
L100	ca00153	Tumor						adenocarcinoma						43.8	0
L101	ca00153	Tumor						adenocarcinoma						40	0
L102	ca00153	Tumor						adenocarcinoma						40	0
L103	ca00153	Tumor						adenocarcinoma						30.8	0
L104	ca00153	Tumor						adenocarcinoma						24.4	0
L105	ca00153	Tumor						adenocarcinoma						28.3	0
L106	ca00153	Tumor						adenocarcinoma						25.3	0
L107	ca00153	Tumor						adenocarcinoma						13	0
L108	ca00153	Tumor						adenocarcinoma						19.5	0
L11	ca00153	Tumor						adenocarcinoma						34.7	1
L111	ca00153	Tumor						adenocarcinoma						1.5	0
L12	ca00153	Tumor						adenocarcinoma						85.2	0
L13	ca00153	Tumor						adenocarcinoma						79.5	1
L17	ca00153	Tumor						adenocarcinoma						83.7	0
L18	ca00153	Tumor						adenocarcinoma						48.2	0
L19	ca00153	Tumor						adenocarcinoma						9.6	1
L20	ca00153	Tumor						adenocarcinoma						19.9	1
L22	ca00153	Tumor						adenocarcinoma						12.5	0
L23	ca00153	Tumor						adenocarcinoma						15.1	0
L24	ca00153	Tumor						adenocarcinoma						1.6	0
L25	ca00153	Tumor						adenocarcinoma						14.5	0
L26	ca00153	Tumor						adenocarcinoma						17.7	0
L27	ca00153	Tumor						adenocarcinoma						21.1	0
L30	ca00153	Tumor						adenocarcinoma						20.2	0
L31	ca00153	Tumor						adenocarcinoma						25.2	0
L33	ca00153	Tumor						adenocarcinoma						29.4	0
L34	ca00153	Tumor						adenocarcinoma						14.9	1
L35	ca00153	Tumor						adenocarcinoma						28.2	1
L36	ca00153	Tumor						adenocarcinoma						7.2	1
L37	ca00153	Tumor						adenocarcinoma						2.6	1
L38	ca00153	Tumor						adenocarcinoma						10	0
L40	ca00153	Tumor						adenocarcinoma						20.1	1
L41	ca00153	Tumor						adenocarcinoma						8.4	1
L42	ca00153	Tumor						adenocarcinoma						63.4	0
L43	ca00153	Tumor						adenocarcinoma						78.5	0
L45	ca00153	Tumor						adenocarcinoma						29.6	1
L46	ca00153	Tumor						adenocarcinoma						82.4	0
L47	ca00153	Tumor						adenocarcinoma						60.5	0
L48	ca00153	Tumor						adenocarcinoma						77.8	0
L49	ca00153	Tumor						adenocarcinoma						70.7	0
L50	ca00153	Tumor						adenocarcinoma						19	1
L52	ca00153	Tumor						adenocarcinoma						65.4	0
L53	ca00153	Tumor						adenocarcinoma						16.6	1
L54	ca00153	Tumor						adenocarcinoma						4	1
L56	ca00153	Tumor						adenocarcinoma						61.8	0
L57	ca00153	Tumor						adenocarcinoma						54.8	0
L59	ca00153	Tumor						adenocarcinoma						54.6	0
L61	ca00153	Tumor						adenocarcinoma						20.6	1
L62	ca00153	Tumor						adenocarcinoma						52.4	0
L64	ca00153	Tumor						adenocarcinoma						48.1	0
L65	ca00153	Tumor						adenocarcinoma						52.9	0
L76	ca00153	Tumor						adenocarcinoma						87.7	0
L78	ca00153	Tumor						adenocarcinoma						36.5	0
L79	ca00153	Tumor						adenocarcinoma						8.7	1
L80	ca00153	Tumor						adenocarcinoma						10.1	1
L81	ca00153	Tumor						adenocarcinoma						36	0
L82	ca00153	Tumor						adenocarcinoma						34.1	0
L83	ca00153	Tumor						adenocarcinoma						30.6	0
L84	ca00153	Tumor						adenocarcinoma						32.2	0
L85	ca00153	Tumor						adenocarcinoma						26.8	0
L86	ca00153	Tumor						adenocarcinoma						10.1	0
L87	ca00153	Tumor						adenocarcinoma						10.4	0
L88	ca00153	Tumor						adenocarcinoma						8.3	0
L89	ca00153	Tumor						adenocarcinoma						12.2	0
L90	ca00153	Tumor						adenocarcinoma						5.8	1
L91	ca00153	Tumor						adenocarcinoma						6.1	0
L92	ca00153	Tumor						adenocarcinoma						8.5	0
L94	ca00153	Tumor						adenocarcinoma						2.4	1
L95	ca00153	Tumor						adenocarcinoma						5.4	1
L96	ca00153	Tumor						adenocarcinoma						21.2	1
L97	ca00153	Tumor						adenocarcinoma						4.9	0
L99	ca00153	Tumor						adenocarcinoma						4.5	0
LN64	ca00153	Tumor						adenocarcinoma
LN66	ca00153	Tumor						adenocarcinoma
LN67	ca00153	Tumor						adenocarcinoma
LN69	ca00153	Tumor						adenocarcinoma
LN70	ca00153	Tumor						adenocarcinoma
LN71	ca00153	Tumor						adenocarcinoma
LN72B	ca00153	Tumor						adenocarcinoma
LN73	ca00153	Tumor						adenocarcinoma
LN74	ca00153	Tumor						adenocarcinoma
LN75	ca00153	Tumor						adenocarcinoma
NCI_Lung_1_U133A	ca00182	Tumor						adenocarcinoma						105.6	0
NCI_Lung_3_U133A	ca00182	Tumor						adenocarcinoma						25.2	0
NCI_Lung_4_U133A	ca00182	Tumor						adenocarcinoma						64.8	1
NCI_Lung_5_U133A	ca00182	Tumor						adenocarcinoma						69.2	0
NCI_Lung_6_U133A	ca00182	Tumor						adenocarcinoma						33.9	1
NCI_Lung_7_U133A	ca00182	Tumor						adenocarcinoma						83	0
NCI_Lung_8_U133A	ca00182	Tumor						adenocarcinoma						69.2	0
NCI_Lung_10_U133A	ca00182	Tumor						adenocarcinoma						27.1	0
NCI_Lung_11_U133A	ca00182	Tumor						adenocarcinoma						5.8	1
NCI_Lung_12_U133A	ca00182	Tumor						adenocarcinoma						50.2	1
NCI_Lung_13_U133A	ca00182	Tumor						adenocarcinoma						73	0
NCI_Lung_14_U133A	ca00182	Tumor						adenocarcinoma						34.8	1
NCI_Lung_15_U133A	ca00182	Tumor						adenocarcinoma						27.6	1
NCI_Lung_16_U133A	ca00182	Tumor						adenocarcinoma						48.8	1
NCI_Lung_17_U133A	ca00182	Tumor						adenocarcinoma						66.6	0
NCI_Lung_18_U133A	ca00182	Tumor						adenocarcinoma						10.1	1
NCI_Lung_19_U133A	ca00182	Tumor						adenocarcinoma						8.7	1
NCI_Lung_20_U133A	ca00182	Tumor						adenocarcinoma						61.2	1
NCI_Lung_21_U133A	ca00182	Tumor						adenocarcinoma						132.2	0
NCI_Lung_22_U133A	ca00182	Tumor						adenocarcinoma						128.8	1
NCI_Lung_23_U133A	ca00182	Tumor						adenocarcinoma						43.8	1
NCI_Lung_25_U133A	ca00182	Tumor						adenocarcinoma						5.9	1
NCI_Lung_26_U133A	ca00182	Tumor						adenocarcinoma						2.4	1
NCI_Lung_27_U133A	ca00182	Tumor						adenocarcinoma						17.6	1
NCI_Lung_28_U133A	ca00182	Tumor						adenocarcinoma						16.3	1
NCI_Lung_29_U133A	ca00182	Tumor						adenocarcinoma						29.6	1
NCI_Lung_30_U133A	ca00182	Tumor						adenocarcinoma						81.2	1
NCI_Lung31_U133A	ca00182	Tumor						adenocarcinoma						59	1
NCI_Lung32_U133A	ca00182	Tumor						adenocarcinoma						92.6	1
NCI_Lung33_U133A	ca00182	Tumor						adenocarcinoma						4	1
NCI_Lung34_U133A	ca00182	Tumor						adenocarcinoma						16.8	1
NCI_Lung35_U133A	ca00182	Tumor						adenocarcinoma						62	0
NCI_Lung36_U133A	ca00182	Tumor						adenocarcinoma						62.3	1
NCI_Lung37_U133A	ca00182	Tumor						adenocarcinoma						71.8	0
NCI_Lung38_U133A	ca00182	Tumor						adenocarcinoma						84	0
NCI_Lung39_U133A	ca00182	Tumor						adenocarcinoma						18.6	1
NCI_Lung40_U133A	ca00182	Tumor						adenocarcinoma						45.8	1
NCI_Lung41_U133A	ca00182	Tumor						adenocarcinoma						20.6	1
NCI_Lung42_U133A	ca00182	Tumor						adenocarcinoma						110.5	0
NCI_Lung43_U133A	ca00182	Tumor						adenocarcinoma						133.6	0
NCI_Lung44_U133A	ca00182	Tumor						adenocarcinoma						70.5	1
NCI_Lung45_U133A	ca00182	Tumor						adenocarcinoma						52.1	0
NCI_Lung46_U133A	ca00182	Tumor						adenocarcinoma						17.6	1
NCI_Lung47_U133A	ca00182	Tumor						adenocarcinoma						16.9	1
NCI_Lung48_U133A	ca00182	Tumor						adenocarcinoma						86.8	0
NCI_Lung49_U133A	ca00182	Tumor						adenocarcinoma						103.4	0
NCI_Lung50_U133A	ca00182	Tumor						adenocarcinoma						117.6	0
NCI_Lung51_U133A	ca00182	Tumor						adenocarcinoma						115.8	1
NCI_Lung52_U133A	ca00182	Tumor						adenocarcinoma						19	1
NCI_Lung53_U133A	ca00182	Tumor						adenocarcinoma						84.1	1
NCI_Lung54_U133A	ca00182	Tumor						adenocarcinoma						153.3	0
NCI_Lung55_U133A	ca00182	Tumor						adenocarcinoma						153.9	0
NCI_Lung56_U133A	ca00182	Tumor						adenocarcinoma						162.6	0
NCI_Lung57_U133A	ca00182	Tumor						adenocarcinoma						63.8	0
NCI_Lung58_U133A	ca00182	Tumor						adenocarcinoma						132.5	1
NCI_Lung_59_U133A	ca00182	Tumor						adenocarcinoma						130.8	0
NCI_Lung_60_U133A	ca00182	Tumor						adenocarcinoma						159.6	0
NCI_Lung_61_U133A	ca00182	Tumor						adenocarcinoma						157.7	0
NCI_Lung_62_U133A	ca00182	Tumor						adenocarcinoma						76.3	0
NCI_Lung_63_U133A	ca00182	Tumor						adenocarcinoma						105.9	0
NCI_Lung_64_U133A	ca00182	Tumor						adenocarcinoma						28.2	1
NCI_Lung_65_U133A	ca00182	Tumor						adenocarcinoma						7.2	1
NCI_Lung_66_U133A	ca00182	Tumor						adenocarcinoma						79.5	1
NCI_Lung_67_U133A	ca00182	Tumor						adenocarcinoma						82.3	0
NCI_Lung_68_U133A	ca00182	Tumor						adenocarcinoma						101.2	0
NCI_Lung_69_U133A	ca00182	Tumor						adenocarcinoma						168.1	0
NCI_Lung_71_U133A	ca00182	Tumor						adenocarcinoma						9.6	1
NCI_Lung_72_U133A	ca00182	Tumor						adenocarcinoma						95	0
NCI_Lung_73_U133A	ca00182	Tumor						adenocarcinoma						62.4	0
NCI_Lung_74_U133A	ca00182	Tumor						adenocarcinoma						64.3	0
NCI_Lung_75_U133A	ca00182	Tumor						adenocarcinoma						20.9	1
NCI_Lung_76_U133A	ca00182	Tumor						adenocarcinoma						22.3	1
NCI_Lung_77_U133A	ca00182	Tumor						adenocarcinoma						67.9	1
NCI_Lung_78_U133A	ca00182	Tumor						adenocarcinoma						36.3	0
NCI_Lung_79_U133A	ca00182	Tumor						adenocarcinoma						22.7	1
NCI_Lung_80_U133A	ca00182	Tumor						adenocarcinoma						32.9	0
NCI_Lung_81_U133A	ca00182	Tumor						adenocarcinoma						38.1	0
NCI_Lung_82_U133A	ca00182	Tumor						adenocarcinoma						54.2	1
NCI_Lung_83_U133A	ca00182	Tumor						adenocarcinoma						96.1	1
NCI_Lung_84_U133A	ca00182	Tumor						adenocarcinoma						53.2	0
NCI_Lung_85_U133A	ca00182	Tumor						adenocarcinoma						12.5	1
NCI_Lung_86_U133A	ca00182	Tumor						adenocarcinoma						29.5	0
NCI_Lung_70_U133A	ca00182	Tumor						adenocarcinoma						14.9	1
NCI_Lung_89_U133A	ca00182	Tumor						adenocarcinoma						107.5	0
NCI_Lung_90_U133A	ca00182	Tumor						adenocarcinoma						53.7	0
NCI_Lung_91_U133A	ca00182	Tumor						adenocarcinoma						21.8	0
NCI_Lung_92_U133A	ca00182	Tumor						adenocarcinoma						55.8	0
NCI_Lung_93_U133A	ca00182	Tumor						adenocarcinoma						21	1
NCI_Lung_95_U133A	ca00182	Tumor						adenocarcinoma						7.3	1
NCI_Lung_96_U133A	ca00182	Tumor						adenocarcinoma						159.9	0
NCI_Lung_97_U133A	ca00182	Tumor						adenocarcinoma						60.8	0
NCI_Lung_98_U133A	ca00182	Tumor						adenocarcinoma						21.2	1
NCI_Lung_99_U133A	ca00182	Tumor						adenocarcinoma						53.6	0
NCI_Lung_100_U133A	ca00182	Tumor						adenocarcinoma						23.2	0
NCI_lung201_U133A	ca00182	Tumor						adenocarcinoma						47.27	0
NCI_lung202_U133A	ca00182	Tumor						adenocarcinoma						59.11	1
NCI_lung203_U133A	ca00182	Tumor						adenocarcinoma						51.58	0
NCI_lung204_U133A	ca00182	Tumor						adenocarcinoma						36.25	1
NCI_lung205_U133A	ca00182	Tumor						adenocarcinoma						6.6	1
NCI_lung206_U133A	ca00182	Tumor						adenocarcinoma						54.93	1
NCI_lung207_U133A	ca00182	Tumor						adenocarcinoma						9.74	1
NCI_lung208__U133A	ca00182	Tumor						adenocarcinoma						58.88	0
NCI_lung209_U133A	ca00182	Tumor						adenocarcinoma						51.81	0
NCI_lung210_U133A	ca00182	Tumor						adenocarcinoma						21.48	1
NCI_lung212_U133A	ca00182	Tumor						adenocarcinoma						6.38	1
NCI_lung213_U133A	ca00182	Tumor						adenocarcinoma						69.01	1
NCI_lung215_U133A	ca00182	Tumor						adenocarcinoma						32.24	1
NCI_lung214_U133A	ca00182	Tumor						adenocarcinoma						64.14	0
NCI_lung216_U133A	ca00182	Tumor						adenocarcinoma							0
NCI_lung218_U133A	ca00182	Tumor						adenocarcinoma						56.35	0
NCI_lung219_U133A	ca00182	Tumor						adenocarcinoma						69.05	0
NCI_lung220_U133A	ca00182	Tumor						adenocarcinoma						56.32	0
NCI_lung221_U133A	ca00182	Tumor						adenocarcinoma						61.25	0
NCI_lung222_U133A	ca00182	Tumor						adenocarcinoma						50.43	0
NCI_lung224_U133A	ca00182	Tumor						adenocarcinoma						73.36	0
NCI_lung227_U133A	ca00182	Tumor						adenocarcinoma						66.74	0
NCI_lung228_U133A	ca00182	Tumor						adenocarcinoma						72.8	0
NCI_lung229_U133A	ca00182	Tumor						adenocarcinoma						19.9	1
NCI_lung230_U133A	ca00182	Tumor						adenocarcinoma						31.28	1
NCI_lung231_U133A	ca00182	Tumor						adenocarcinoma						45.33	1
NCI_lung234_U133A	ca00182	Tumor						adenocarcinoma						83.95	0
NCI_lung235_U133A	ca00182	Tumor						adenocarcinoma						12.63	1
NCI_lung236_U133A	ca00182	Tumor						adenocarcinoma						77.89	0
NCI_lung237_U133A	ca00182	Tumor						adenocarcinoma						11.18	0
NCI_lung238_U133A	ca00182	Tumor						adenocarcinoma						30.53	0
NCI_lung239_U133A	ca00182	Tumor						adenocarcinoma						73.59	0
NCI_lung240_U133A	ca00182	Tumor						adenocarcinoma						11.68	1
NCI_lung246_U133A	ca00182	Tumor						adenocarcinoma						74.61	0
NCI_lung247_U133A	ca00182	Tumor						adenocarcinoma						31.94	1
NCI_lung249_U133A	ca00182	Tumor						adenocarcinoma						2.24	1
NCI_lung258_U133A	ca00182	Tumor						adenocarcinoma						8.85	1
NCI_lung259_U133A	ca00182	Tumor						adenocarcinoma						92.2	0
NCI_lung263_U133A	ca00182	Tumor						adenocarcinoma						90.07	0
NCI_lung267_U133A	ca00182	Tumor						adenocarcinoma						24.97	1
NCI_lung268_U133A	ca00182	Tumor						adenocarcinoma						42.04	1
NCI_lung269_U133A	ca00182	Tumor						adenocarcinoma						12.2	1
NCI_lung270_U133A	ca00182	Tumor						adenocarcinoma						2.7	1
NCI_lung271_U133A	ca00182	Tumor						adenocarcinoma						96	1
NCI_lung272_U133A	ca00182	Tumor						adenocarcinoma						66.1	1
NCI_lung273_U133A	ca00182	Tumor						adenocarcinoma						68.6	1
NCI_lung274_U133A	ca00182	Tumor						adenocarcinoma						48	1
NCI_lung275_U133A	ca00182	Tumor						adenocarcinoma						30.7	1
NCI_lung276_U133A	ca00182	Tumor						adenocarcinoma						80.9	1
NCI_lung277_U133A	ca00182	Tumor						adenocarcinoma						11.7	1
NCI_lung278_U133A	ca00182	Tumor						adenocarcinoma						33.2	1
NCI_lung280_U133A	ca00182	Tumor						adenocarcinoma						42.5	1
NCI_lung281_U133	ca00182	Tumor						adenocarcinoma						122.4	1
NCI_lung282_U133	ca00182	Tumor						adenocarcinoma						30.2	1
NCI_lung283_U133	ca00182	Tumor						adenocarcinoma						78.5	1
NCI_lung285_U133	ca00182	Tumor						adenocarcinoma						73.2	1
NCI_lung286_U133	ca00182	Tumor						adenocarcinoma						65.2	1
NCI_lung288__U133	ca00182	Tumor						adenocarcinoma						145.8	0
NCI_lung289_U133	ca00182	Tumor						adenocarcinoma						73.7	1
NCI_lung290_U133	ca00182	Tumor						adenocarcinoma						3.3	1
NCI_lung291_U133	ca00182	Tumor						adenocarcinoma						19.5	1
NCI_lung292_U133	ca00182	Tumor						adenocarcinoma						8.4	1
NCI_lung293_U133	ca00182	Tumor						adenocarcinoma						26.9	1
NCI_lung294_U133	ca00182	Tumor						adenocarcinoma						129.8	0
NCI_lung295_U133	ca00182	Tumor						adenocarcinoma						19.6	1
NCI_Lung296_U133	ca00182	Tumor						adenocarcinoma						105.4	1
NCI_Lung297_U133	ca00182	Tumor						adenocarcinoma						157.5	1
NCI_Lung298_U133	ca00182	Tumor						adenocarcinoma						120.5	1
NCI_Lung299_U133	ca00182	Tumor						adenocarcinoma						47.8	1
NCI_Lung300_U133	ca00182	Tumor						adenocarcinoma						130	1
NCI_Lung304_U133	ca00182	Tumor						adenocarcinoma						52.3	0
NCI_Lung305_U133	ca00182	Tumor						adenocarcinoma						69.4	0
NCI_Lung306_U133	ca00182	Tumor						adenocarcinoma						25.95	1
NCI_Lung307_U133	ca00182	Tumor						adenocarcinoma						121.8	0
NCI_Lung309_U133	ca00182	Tumor						adenocarcinoma						32.6	1
NCI_Lung310_U133	ca00182	Tumor						adenocarcinoma						40.2	1
NCI_Lung311_U133	ca00182	Tumor						adenocarcinoma						14.5	1
NCI_Lung312_U133	ca00182	Tumor						adenocarcinoma						9.2	1
NCI_Lung313_U133	ca00182	Tumor						adenocarcinoma						19	1
NCI_Lung314_U133A	ca00182	Tumor						adenocarcinoma						121.2	0
NCI_Lung318_U133A	ca00182	Tumor						adenocarcinoma						9	1
NCI_Lung319_U133A	ca00182	Tumor						adenocarcinoma						97.6	0
NCI_Lung320_U133A	ca00182	Tumor						adenocarcinoma						175.9	0
NCI_Lung321_U133A	ca00182	Tumor						adenocarcinoma						45.3	1
Moff_0130D	ca00182	Tumor						adenocarcinoma						44.94	1
Moff_1300F	ca00182	Tumor						adenocarcinoma						27.63	1
Moff_1473F	ca00182	Tumor						adenocarcinoma						41.33	1
Moff_1477G	ca00182	Tumor						adenocarcinoma						5.65	1
Moff_1734M	ca00182	Tumor						adenocarcinoma						104.47	0
Moff_1835I	ca00182	Tumor						adenocarcinoma						70.6	1
Moff_2325E	ca00182	Tumor						adenocarcinoma						39.06	1
Moff_2362A	ca00182	Tumor						adenocarcinoma						84.44	0
Moff_2366C	ca00182	Tumor						adenocarcinoma						42.18	1
Moff_2373H	ca00182	Tumor						adenocarcinoma						85.65	1
Moff_2463A	ca00182	Tumor						adenocarcinoma						39.36	1
Moff_2497D	ca00182	Tumor						adenocarcinoma						42.02	1
Moff_2955B	ca00182	Tumor						adenocarcinoma						40.97	1
Moff_2958D	ca00182	Tumor						adenocarcinoma						76.12	0
Moff_2996G	ca00182	Tumor						adenocarcinoma						72.64	1
Moff_3003G	ca00182	Tumor						adenocarcinoma						11.99	1
Moff_3053B	ca00182	Tumor						adenocarcinoma						21.88	1
Moff_3274K	ca00182	Tumor						adenocarcinoma						72.05	0
Moff_2219F	ca00182	Tumor						adenocarcinoma						45.24	1
Moff_2352G	ca00182	Tumor						adenocarcinoma						2.27	1
Moff_2401B	ca00182	Tumor						adenocarcinoma						92.52	0
Moff_2472B	ca00182	Tumor						adenocarcinoma						31.7	0
Moff_2595A	ca00182	Tumor						adenocarcinoma						47.9	1
Moff_2629F	ca00182	Tumor						adenocarcinoma						81.54	0
Moff_2634G	ca00182	Tumor						adenocarcinoma						24.51	1
Moff_2663F	ca00182	Tumor						adenocarcinoma						9.63	1
Moff_2690H	ca00182	Tumor						adenocarcinoma						40.21	1
Moff_2886F	ca00182	Tumor						adenocarcinoma						66.69	0
Moff_3009D	ca00182	Tumor						adenocarcinoma						6.24	1
Moff_0480I	ca00182	Tumor						adenocarcinoma						8.61	1
Moff_0604H	ca00182	Tumor						adenocarcinoma						37.55	1
Moff_0683H	ca00182	Tumor						adenocarcinoma						106.58	0
Moff_0711B	ca00182	Tumor						adenocarcinoma						56.8	1
Moff_0928E	ca00182	Tumor						adenocarcinoma						13.33	1
Moff_0936G	ca00182	Tumor						adenocarcinoma						105.99	1
Moff_1221F	ca00182	Tumor						adenocarcinoma						44.42	1
Moff_1276H	ca00182	Tumor						adenocarcinoma						20.86	1
Moff_1343G	ca00182	Tumor						adenocarcinoma						74.18	1
Moff_1400H	ca00182	Tumor						adenocarcinoma						96	1
Moff_1487F	ca00182	Tumor						adenocarcinoma						0.43	1
Moff_1576F	ca00182	Tumor						adenocarcinoma						61.21	1
Moff_1888E	ca00182	Tumor						adenocarcinoma						27.56	1
Moff_1903E	ca00182	Tumor						adenocarcinoma						16.39	1
Moff_2072G	ca00182	Tumor						adenocarcinoma						77.7	0
Moff_2186B	ca00182	Tumor						adenocarcinoma						94.16	0
Moff_2199G	ca00182	Tumor						adenocarcinoma						73.4	0
Moff_2658C	ca00182	Tumor						adenocarcinoma						7.03	1
NCI_U133A_1L	ca00182	Tumor						adenocarcinoma						16	1
NCI_U133A_2L	ca00182	Tumor						adenocarcinoma						72	0
NCI_U133A_33L	ca00182	Tumor						adenocarcinoma						20	1
NCI_U133A_41L	ca00182	Tumor						adenocarcinoma						60	0
NCI_U133A_55L	ca00182	Tumor						adenocarcinoma						80	0
NCI_U133A_56L	ca00182	Tumor						adenocarcinoma						42	1
NCI_U133A_62L	ca00182	Tumor						adenocarcinoma						68	0
NCI_U133A_69L	ca00182	Tumor						adenocarcinoma						25	1
NCI_U133A_72L	ca00182	Tumor						adenocarcinoma						50	0
NCI_U133A_75L	ca00182	Tumor						adenocarcinoma						78	1
NCI_U133A_85L	ca00182	Tumor						adenocarcinoma						42	0
NCI_U133A_91L	ca00182	Tumor						adenocarcinoma						55	0
NCI_U133A_13L	ca00182	Tumor						adenocarcinoma						69	0
NCI_U133A_15L	ca00182	Tumor						adenocarcinoma						21	1
NCI_U133A_21L	ca00182	Tumor						adenocarcinoma						14	1
NCI_U133A_28L	ca00182	Tumor						adenocarcinoma						33	0
NCI_U133A_29L	ca00182	Tumor						adenocarcinoma						24	1
NCI_U133A_34L	ca00182	Tumor						adenocarcinoma						52	1
NCI_U133A_53L	ca00182	Tumor						adenocarcinoma						204	1
NCI_U133A_76L	ca00182	Tumor						adenocarcinoma						48	0
NCI_U133A_80L	ca00182	Tumor						adenocarcinoma						24	1
NCI_U133A_86L	ca00182	Tumor						adenocarcinoma						46	0
Moff_0770K	ca00182	Tumor						adenocarcinoma						30.12	1
Moff_1883G	ca00182	Tumor						adenocarcinoma						17.54	1
Moff_2333J	ca00182	Tumor						adenocarcinoma						77.6	1
Moff_3191I	ca00182	Tumor						adenocarcinoma						78.85	0
Moff_3298E	ca00182	Tumor						adenocarcinoma						28.25	1
Moff_3730B	ca00182	Tumor						adenocarcinoma						39.03	0
Moff_4112G	ca00182	Tumor						adenocarcinoma						15.77	1
Moff_4172B	ca00182	Tumor						adenocarcinoma						27.66	1
Moff_4217B	ca00182	Tumor						adenocarcinoma						29.67	1
NCI_U133A_6L	ca00182	Tumor						adenocarcinoma						66	0
NCI_U133A_10L	ca00182	Tumor						adenocarcinoma						92	0
NCI_U133A_11L	ca00182	Tumor						adenocarcinoma						65	0
NCI_U133A_14L	ca00182	Tumor						adenocarcinoma						40	1
NCI_U133A_17L	ca00182	Tumor						adenocarcinoma						26	1
NCI_U133A_20L	ca00182	Tumor						adenocarcinoma						66	0
NCI_U133A_22L	ca00182	Tumor						adenocarcinoma						33	0
NCI_U133A_24L	ca00182	Tumor						adenocarcinoma						66	0
NCI_U133A_26L	ca00182	Tumor						adenocarcinoma						91	0
NCI_U133A_27L	ca00182	Tumor						adenocarcinoma						68	1
NCI_U133A_31L	ca00182	Tumor						adenocarcinoma						114	1
NCI_U133A_35L	ca00182	Tumor						adenocarcinoma						93	0
NCI_U133A_38L	ca00182	Tumor						adenocarcinoma						100	0
NCI_U133A_40L	ca00182	Tumor						adenocarcinoma						32	1
NCI_U133A_43L	ca00182	Tumor						adenocarcinoma						15	1
NCI_U133A_45L	ca00182	Tumor						adenocarcinoma						54	0
NCI_U133A_48L	ca00182	Tumor						adenocarcinoma						115	0
NCI_U133A_63L	ca00182	Tumor						adenocarcinoma						7	0
NCI_U133A_73L	ca00182	Tumor						adenocarcinoma						57	1
NCI_U133A_89L	ca00182	Tumor						adenocarcinoma						38	0
NCI_U133A_90L	ca00182	Tumor						adenocarcinoma						43	0
NCI_U133A_106L	ca00182	Tumor						adenocarcinoma						43	0
NCI_U133A_97L	ca00182	Tumor						adenocarcinoma						64	0
NCI_U133A_3L	ca00182	Tumor						adenocarcinoma						47	0
NCI_U133A_4L	ca00182	Tumor						adenocarcinoma						52	1
NCI_U133A_7L	ca00182	Tumor						adenocarcinoma						44	0
NCI_U133A_8L	ca00182	Tumor						adenocarcinoma						70	0
NCI_U133A_9L	ca00182	Tumor						adenocarcinoma						75	0
NCI_U133A_16L	ca00182	Tumor						adenocarcinoma						29	1
NCI_U133A_23L	ca00182	Tumor						adenocarcinoma						85	0
NCI_U133A_30L	ca00182	Tumor						adenocarcinoma						62	0
NCI_U133A_37L_Rep	ca00182	Tumor						adenocarcinoma						14	1
NCI_U133A_42L	ca00182	Tumor						adenocarcinoma						50	0
NCI_U133A_46L	ca00182	Tumor						adenocarcinoma						31	0
NCI_U133A_50L	ca00182	Tumor						adenocarcinoma						48	1
NCI_U133A_52L	ca00182	Tumor						adenocarcinoma						91	0
NCI_U133A_68L	ca00182	Tumor						adenocarcinoma						41	0
NCI_U133A_70L	ca00182	Tumor						adenocarcinoma						42	0
NCI_U133A_71L	ca00182	Tumor						adenocarcinoma						51	1
NCI_U133A_74L	ca00182	Tumor						adenocarcinoma						13	1
NCI_U133A_77L	ca00182	Tumor						adenocarcinoma						33	1
NCI_U133A_78L	ca00182	Tumor						adenocarcinoma						37	0
NCI_U133A_79L	ca00182	Tumor						adenocarcinoma						17	1
NCI_U133A_81L	ca00182	Tumor						adenocarcinoma						44	0
NCI_U133A_82L	ca00182	Tumor						adenocarcinoma						30	0
NCI_U133A_84L	ca00182	Tumor						adenocarcinoma						88	0
NCI_U133A_88L	ca00182	Tumor						adenocarcinoma						40	0
NCI_U133A_5L	ca00182	Tumor						adenocarcinoma						39	1
NCI_U133A_12L	ca00182	Tumor						adenocarcinoma						43	0
NCI_U133A_18L	ca00182	Tumor						adenocarcinoma						77	0
NCI_U133A_19L	ca00182	Tumor						adenocarcinoma						2	1
NCI_U133A_25L	ca00182	Tumor						adenocarcinoma						15	0
NCI_U133A_32L	ca00182	Tumor						adenocarcinoma						4	1
NCI_U133A_39L	ca00182	Tumor						adenocarcinoma						33	0
NCI_U133A_44L	ca00182	Tumor						adenocarcinoma						37	0
NCI_U133A_47L	ca00182	Tumor						adenocarcinoma						38	0
NCI_U133A_49L	ca00182	Tumor						adenocarcinoma						36	0
NCI_U133A_54L	ca00182	Tumor						adenocarcinoma						50	0
NCI_U133A_59L	ca00182	Tumor						adenocarcinoma						62	1
NCI_U133A_60L	ca00182	Tumor						adenocarcinoma						22	0
NCI_U133A_61L	ca00182	Tumor						adenocarcinoma						63	0
NCI_U133A_64L	ca00182	Tumor						adenocarcinoma						52	1
NCI_U133A_65L	ca00182	Tumor						adenocarcinoma						36	0
NCI_U133A_66L	ca00182	Tumor						adenocarcinoma						15	1
NCI_U133A_67L	ca00182	Tumor						adenocarcinoma						20	1
NCI_U133A_83L	ca00182	Tumor						adenocarcinoma						50	0
NCI_U133A_87L	ca00182	Tumor						adenocarcinoma						56	0
NCI_U133A_92L	ca00182	Tumor						adenocarcinoma						17	1
NCI_U133A_93L	ca00182	Tumor						adenocarcinoma						36	0
NCI_U133A_95L	ca00182	Tumor						adenocarcinoma						23	1
NCI_U133A_96L	ca00182	Tumor						adenocarcinoma						62	0
NCI_U133A_98L	ca00182	Tumor						adenocarcinoma						85	0
NCI_U133A_100L	ca00182	Tumor						adenocarcinoma						48	1
NCI_U133A_101L	ca00182	Tumor						adenocarcinoma						57	0
NCI_U133A_102L	ca00182	Tumor						adenocarcinoma						43	0
NCI_U133A_103L	ca00182	Tumor						adenocarcinoma						41	0
NCI_U133A_107L	ca00182	Tumor						adenocarcinoma						32	0
NCI_U133A_51L	ca00182	Tumor						adenocarcinoma						19	1
NCI_U133A_57L	ca00182	Tumor						adenocarcinoma						60	0
NCI_U133A_58L	ca00182	Tumor						adenocarcinoma						26	0
NCI_U133A_94L_Rep	ca00182	Tumor						adenocarcinoma						10	1
NCI_U133A_99L	ca00182	Tumor						adenocarcinoma						47	1
Moff_0184A	ca00182	Tumor						adenocarcinoma						34.76	1
Moff_0404A	ca00182	Tumor						adenocarcinoma						19.84	1
Moff_0516E	ca00182	Tumor						adenocarcinoma						0.53	1
Moff_0686G	ca00182	Tumor						adenocarcinoma						123.3	0
Moff_1514K	ca00182	Tumor						adenocarcinoma						16.56	1
Moff_1864H	ca00182	Tumor						adenocarcinoma						3.52	1
Moff_2296D	ca00182	Tumor						adenocarcinoma						0.03	1
Moff_2470G	ca00182	Tumor						adenocarcinoma						82.5	0
Moff_2550F	ca00182	Tumor						adenocarcinoma						7.69	1
Moff_2603I	ca00182	Tumor						adenocarcinoma						58.84	0
Moff_3401F	ca00182	Tumor						adenocarcinoma						53.39	0
Moff_4094F	ca00182	Tumor						adenocarcinoma						52.2	1
Moff_3510G	ca00182	Tumor						adenocarcinoma						12.02	1
Moff_0142C	ca00182	Tumor						adenocarcinoma						150.18	0
Moff_0298B	ca00182	Tumor						adenocarcinoma						24.74	1
Moff_0542F	ca00182	Tumor						adenocarcinoma						16.49	1
Moff_1817G1	ca00182	Tumor						adenocarcinoma						8.94	1
Moff_1940G	ca00182	Tumor						adenocarcinoma						26.38	1
Moff_2310K	ca00182	Tumor						adenocarcinoma						75.73	1
Moff_2517G1	ca00182	Tumor						adenocarcinoma						5.78	1
Moff_0291A	ca00182	Tumor						adenocarcinoma						15.47	1
Moff_0170D	ca00182	Tumor						adenocarcinoma						18.2	1
Moff_0978B	ca00182	Tumor						adenocarcinoma						79.54	1
CL2004111013AA	ca00182	Tumor						adenocarcinoma						107	0
CL2004111022AA	ca00182	Tumor						adenocarcinoma						25	1
CL2004111042AA	ca00182	Tumor						adenocarcinoma						96	0
CL2004111002AA	ca00182	Tumor						adenocarcinoma						98	0
CL2004111043AA	ca00182	Tumor						adenocarcinoma						37	1
CL2004111046AA	ca00182	Tumor						adenocarcinoma						71	1
CL2004111003AA	ca00182	Tumor						adenocarcinoma						110	0
CL2004110909AA	ca00182	Tumor						adenocarcinoma						110	0
CL2004111017AA	ca00182	Tumor						adenocarcinoma						6	1
CL2004111033AA	ca00182	Tumor						adenocarcinoma						95	1
CL2004111040AA	ca00182	Tumor						adenocarcinoma						38	1
CL2004111044AA	ca00182	Tumor						adenocarcinoma						87	0
CL2004111048AA	ca00182	Tumor						adenocarcinoma						74	0
CL2004111041AA	ca00182	Tumor						adenocarcinoma						15	1
CL2004111010AA	ca00182	Tumor						adenocarcinoma						79	1
CL2004111018AA	ca00182	Tumor						adenocarcinoma						105	0
CL2004111045AA	ca00182	Tumor						adenocarcinoma						13	1
CL2004111038AA	ca00182	Tumor						adenocarcinoma						13	1
CL2004111097AA	ca00182	Tumor						adenocarcinoma						76	0
CL2004111098AA	ca00182	Tumor						adenocarcinoma						34	1
CL20041110100AA	ca00182	Tumor						adenocarcinoma						66	0
CL20041110102AA	ca00182	Tumor						adenocarcinoma						29	1
CL20041110103AA	ca00182	Tumor						adenocarcinoma						7	1
CL20041110104AA	ca00182	Tumor						adenocarcinoma						53	0
CL20041110107AA	ca00182	Tumor						adenocarcinoma						63	0
CL20041110108AA	ca00182	Tumor						adenocarcinoma						23	0
CL20041110109AA	ca00182	Tumor						adenocarcinoma						62	0
CL20041110110AA	ca00182	Tumor						adenocarcinoma						7	1
CL20041110111AA	ca00182	Tumor						adenocarcinoma						26	0
CL20041116136AA	ca00182	Tumor						adenocarcinoma						9	1
CL20041116127AA	ca00182	Tumor						adenocarcinoma						88	0
CL20041116126AA	ca00182	Tumor						adenocarcinoma						85	0
CL20041116134AA	ca00182	Tumor						adenocarcinoma						9	1
CL20041116156AA	ca00182	Tumor						adenocarcinoma						64	0
CL20041116112AA	ca00182	Tumor						adenocarcinoma						40	0
CL20041116113AA	ca00182	Tumor						adenocarcinoma						30	0
CL20041116114AA	ca00182	Tumor						adenocarcinoma						40	0
CL20041119167AA	ca00182	Tumor						adenocarcinoma						59	0
CL20041119175AA	ca00182	Tumor						adenocarcinoma						74	1
CL20041119179AA	ca00182	Tumor						adenocarcinoma						84	0
CL20041119180AA	ca00182	Tumor						adenocarcinoma						18	1
CL20041119181AA	ca00182	Tumor						adenocarcinoma						25	1
CL20041119182AA	ca00182	Tumor						adenocarcinoma						80	0
CL20041119183AA	ca00182	Tumor						adenocarcinoma						12	1
CL20041119184AA	ca00182	Tumor						adenocarcinoma						32	0
CL20041119185AA	ca00182	Tumor						adenocarcinoma						105	0
CL20041119186AA	ca00182	Tumor						adenocarcinoma						81	0
CL20041119187AA	ca00182	Tumor						adenocarcinoma						75	0
CL20041119190AA	ca00182	Tumor						adenocarcinoma						97	0
CL20041119191AA	ca00182	Tumor						adenocarcinoma						18	1
CL20041119192AA	ca00182	Tumor						adenocarcinoma						32	1
CL20041119194AA	ca00182	Tumor						adenocarcinoma						10	1
CL2005060326AA	ca00182	Tumor						adenocarcinoma						90	0
CL2005060345AA	ca00182	Tumor						adenocarcinoma						40	0
CL2005060338AA	ca00182	Tumor						adenocarcinoma						9	1
CL2005060327AA	ca00182	Tumor						adenocarcinoma						8	1
CL2005060344AA	ca00182	Tumor						adenocarcinoma						55	0
CL2005060346AA	ca00182	Tumor						adenocarcinoma						36	0
CL2005060341AA	ca00182	Tumor						adenocarcinoma						11	1
CL2005060339AA	ca00182	Tumor						adenocarcinoma						97	0
CL2005060332AA	ca00182	Tumor						adenocarcinoma						4	1
CL2005060334AA	ca00182	Tumor						adenocarcinoma						36	1
CL2005060343AA	ca00182	Tumor						adenocarcinoma						44	1
CL2005060328AA	ca00182	Tumor						adenocarcinoma						90	0
CL2005060329AA	ca00182	Tumor						adenocarcinoma						85	0
CL2005060333AA	ca00182	Tumor						adenocarcinoma						71	1
CL2005060337AA	ca00182	Tumor						adenocarcinoma						64	1
CL2005060336AA	ca00182	Tumor						adenocarcinoma						65	1
CL2005060340AA	ca00182	Tumor						adenocarcinoma						68	0
CL2005060342AA	ca00182	Tumor						adenocarcinoma						63	0
CL2005060348AA	ca00182	Tumor						adenocarcinoma						95	0
CL2005060349AA	ca00182	Tumor						adenocarcinoma						74	0
CL2005060350AA	ca00182	Tumor						adenocarcinoma						57	1
CL2005060351AA	ca00182	Tumor						adenocarcinoma						56	1
CL2005060352AA	ca00182	Tumor						adenocarcinoma						48	0
CL2005060353AA	ca00182	Tumor						adenocarcinoma						49	0
CL2005060354AA	ca00182	Tumor						adenocarcinoma						28	0
CL2005060355AA	ca00182	Tumor						adenocarcinoma						36	0
CL2005060356AA	ca00182	Tumor						adenocarcinoma						40	0
CL2005060357AA	ca00182	Tumor						adenocarcinoma						37	0
CL2005060358AA	ca00182	Tumor						adenocarcinoma						40	0
CL2005060360AA	ca00182	Tumor						adenocarcinoma						23	1
CL2001032638AA	ca00191	Tumor						adenocarcinoma						14.1	1
CL2001042506AA	ca00191	Tumor						adenocarcinoma
CL2001032716AA	ca00191	Tumor						adenocarcinoma
CL2001032233AA	ca00191	Tumor						adenocarcinoma						72.4	0
CL2001032603AA	ca00191	Tumor						adenocarcinoma						66.2	0
CL2001032624AA	ca00191	Tumor						adenocarcinoma						21.9	1
CL2001032020AA	ca00191	Tumor						adenocarcinoma						49.6	1
CL2001032845AA	ca00191	Tumor						adenocarcinoma						76.6	0
CL2001032739AA	ca00191	Tumor						adenocarcinoma						38.9	1
CL2001032856AA	ca00191	Tumor						adenocarcinoma						33.9	1
CL2001032643AA	ca00191	Tumor						adenocarcinoma						74	0
CL2001032241AA	ca00191	Tumor						adenocarcinoma						8.2	1
CL2001032232AA	ca00191	Tumor						adenocarcinoma						7.1	1
CL2001031622AA	ca00191	Tumor						adenocarcinoma						76	0
CL2001032729AA	ca00191	Tumor						adenocarcinoma						31.4	0
CL2001032306AA	ca00191	Tumor						adenocarcinoma
CL2001032250AA	ca00191	Tumor						adenocarcinoma						4.1	1
CL2001031630AA	ca00191	Tumor						adenocarcinoma						40.7	1
CL2001032839AA	ca00191	Tumor						adenocarcinoma						19.7	1
CL2001032149AA	ca00191	Tumor						adenocarcinoma
CL2001032702AA	ca00191	Tumor						adenocarcinoma						41.7	0
CL2001041714AA	ca00191	Tumor						adenocarcinoma						86.7	1
CL2001032703AA	ca00191	Tumor						adenocarcinoma						15	1
CL2001032841AA	ca00191	Tumor						adenocarcinoma						41.7	0
CL2001032735AA	ca00191	Tumor						adenocarcinoma						20	1
CL2001032640AA	ca00191	Tumor						adenocarcinoma						78.4	0
CL2001032709AA	ca00191	Tumor						adenocarcinoma						66.7	0
CL2001032604AA	ca00191	Tumor						adenocarcinoma						22.3	1
CL2001032601AA	ca00191	Tumor						adenocarcinoma						2.8	1
CL2001032234AA	ca00191	Tumor						adenocarcinoma						29	1
CL2001032734AA	ca00191	Tumor						adenocarcinoma						24.3	1
CL2001032301AA	ca00191	Tumor						adenocarcinoma
CL2001032840AA	ca00191	Tumor						adenocarcinoma						42.2	0
CL2001032843AA	ca00191	Tumor						adenocarcinoma						21	1
CL2001032125AA	ca00191	Tumor						adenocarcinoma						84.4	0
CL2001032130AA	ca00191	Tumor						adenocarcinoma						86.3	1
CL2001032733AA	ca00191	Tumor						adenocarcinoma						21.6	1
CL2001032307AA	ca00191	Tumor						adenocarcinoma
CL2001032842AA	ca00191	Tumor						adenocarcinoma
CL2001032141AA	ca00191	Tumor						adenocarcinoma						12.3	1
CL2001032612AA	ca00191	Tumor						adenocarcinoma						59	0
CL2001032025AA	ca00191	Tumor						adenocarcinoma						106.1	0
CL2001032026AA	ca00191	Tumor						adenocarcinoma						66.8	1
CL2001032229AA	ca00191	Tumor						adenocarcinoma						15	1
CL2001032628AA	ca00191	Tumor						adenocarcinoma						59.3	0
CL2001032138AA	ca00191	Tumor						adenocarcinoma						59	0
CL2001032309AA	ca00191	Tumor						adenocarcinoma						48.8	1
CL2001032310AA	ca00191	Tumor						adenocarcinoma						61.8	0
CL2001031615AA	ca00191	Tumor						adenocarcinoma						15.3	0
CL2001032212AA	ca00191	Tumor						adenocarcinoma						54.5	0
CL2001032647AA	ca00191	Tumor						adenocarcinoma						2.6	1
CL2001031618AA	ca00191	Tumor						adenocarcinoma						60.5	0
CL2001032312AA	ca00191	Tumor						adenocarcinoma						41.2	1
CL2001032142AA	ca00191	Tumor						adenocarcinoma						56.7	0
CL2001032032AA	ca00191	Tumor						adenocarcinoma						56.3	0
CL2001032308AA	ca00191	Tumor						adenocarcinoma						34.1	0
CL2001032211AA	ca00191	Tumor						adenocarcinoma						14.2	1
CL2001032620AA	ca00191	Tumor						adenocarcinoma						25.1	1
CL2001032132AA	ca00191	Tumor						adenocarcinoma						58.5	0
CL2001032616AA	ca00191	Tumor						adenocarcinoma						43.5	0
CL2001032136AA	ca00191	Tumor						adenocarcinoma						26.7	1
CL2001032318AA	ca00191	Tumor						adenocarcinoma						50.1	0
CL2001032027AA	ca00191	Tumor						adenocarcinoma						71.1	0
CL2001032617AA	ca00191	Tumor						adenocarcinoma						31	1
CL2001032031AA	ca00191	Tumor						adenocarcinoma						91	0
CL2001032030AA	ca00191	Tumor						adenocarcinoma						16.5	1
CL2001031616AA	ca00191	Tumor						adenocarcinoma						59.2	0
CL2001032135AA	ca00191	Tumor						adenocarcinoma						44.8	0
CL2001032646AA	ca00191	Tumor						adenocarcinoma						12.3	1
CL2001032213AA	ca00191	Tumor						adenocarcinoma						20.5	1
CL2001032028AA	ca00191	Tumor						adenocarcinoma						21	1
CL2001032214AA	ca00191	Tumor						adenocarcinoma						57.6	0
CL2001032315AA	ca00191	Tumor						adenocarcinoma						16.6	1
CL2001032013AA	ca00191	Tumor						adenocarcinoma						41.9	1
CL2001032012AA	ca00191	Tumor						adenocarcinoma						56	0
CL2001032645AA	ca00191	Tumor						adenocarcinoma						50.1	0
CL2001031635AA	ca00191	Tumor						adenocarcinoma						48.3	1
CL2001032311AA	ca00191	Tumor						adenocarcinoma						13.5	1
CL2001032016AA	ca00191	Tumor						adenocarcinoma						4.5	1
CL2001032255AA	ca00191	Tumor						adenocarcinoma						8.2	1
CL2001032254AA	ca00191	Tumor						adenocarcinoma						47.2	1
CL2001032717AA	ca00191	Tumor						adenocarcinoma						29.4	1
CL2001031636AA	ca00191	Tumor						adenocarcinoma						7.4	1
CL2001032114AA	ca00191	Tumor						adenocarcinoma						40.5	0
CL2001032252AA	ca00191	Tumor						adenocarcinoma						45.5	0
CL2001032623AA	ca00191	Tumor						adenocarcinoma						9.3	1
CL2001032742AA	ca00191	Tumor						adenocarcinoma						37.9	1
CL2001031611AA	ca00191	Tumor						adenocarcinoma
CL2001032741AA	ca00191	Tumor						adenocarcinoma						7.8	1
CL2001032838AA	ca00191	Tumor						adenocarcinoma						57.8	1
CL2001032746AA	ca00191	Tumor						adenocarcinoma						8.2	1
CL2001032156AA	ca00191	Tumor						adenocarcinoma						88.8	0
CL2001032706AA	ca00191	Tumor						adenocarcinoma						79	0
CL2001041711AA	ca00191	Tumor						adenocarcinoma						37.6	1
CL2001032259AA	ca00191	Tumor						adenocarcinoma
CL2001032257AA	ca00191	Tumor						adenocarcinoma						50.5	0
CL2001031628AA	ca00191	Tumor						adenocarcinoma						25.3	1
CL2001032610AA	ca00191	Tumor						adenocarcinoma						29.6	1
CL2001041716AA	ca00191	Tumor						adenocarcinoma						56.7	0
CL2001032109AA	ca00191	Tumor						adenocarcinoma						99.1	0
CL2001040306AA	ca00191	Tumor						adenocarcinoma						83	0
CL2001040305AA	ca00191	Tumor						adenocarcinoma						85.9	0
CL2001032110AA	ca00191	Tumor						adenocarcinoma						6.8	1
CL2001031625AA	ca00191	Tumor						adenocarcinoma						81.9	0
CL2001032613AA	ca00191	Tumor						adenocarcinoma						7.3	1
CL2001032846AA	ca00191	Tumor						adenocarcinoma						52.9	0
CL2001032747AA	ca00191	Tumor						adenocarcinoma						6	1
CL2001032707AA	ca00191	Tumor						adenocarcinoma						0.1	1
CL2001032737AA	ca00191	Tumor						adenocarcinoma						46.9	0
CL2001041708AA	ca00191	Tumor						adenocarcinoma						21.1	1
CL2001032738AA	ca00191	Tumor						adenocarcinoma						29.3	0
CL2001032115AA	ca00191	Tumor						adenocarcinoma						75.4	0
CL2001031634AA	ca00191	Tumor						adenocarcinoma						18.7	1
CL2001032321AA	ca00191	Tumor						adenocarcinoma						56.1	1
CL2001032011AA	ca00191	Tumor						adenocarcinoma						17.3	0
CL2001040314AA	ca00191	Tumor						adenocarcinoma						0.5	0
CL2001032111AA	ca00191	Tumor						adenocarcinoma						35.1	1
CL2001032113AA	ca00191	Tumor						adenocarcinoma						24.3	1
CL2001031632AA	ca00191	Tumor						adenocarcinoma						4.2	1
CL2001032857AA	ca00191	Tumor						adenocarcinoma						13.7	0
CL2001032704AA	ca00191	Tumor						adenocarcinoma
CL2001032034AA	ca00191	Tumor						adenocarcinoma						49.2	0
CL2001032639AA	ca00191	Tumor						adenocarcinoma
CL2001032134AA	ca00191	Tumor						adenocarcinoma						6.4	1
CL2001032602AA	ca00191	Tumor						adenocarcinoma						71.5	1
CL2001032848AA	ca00191	Tumor						adenocarcinoma						10.5	1
CL2001032116AA	ca00191	Tumor						adenocarcinoma						9.4	1
CL2001032614AA	ca00191	Tumor						adenocarcinoma						76.1	0
CL2001032314AA	ca00191	Tumor						adenocarcinoma						62.6	0
CL2001032015AA	ca00191	Tumor						adenocarcinoma						26	1
CL2001032248AA	ca00191	Tumor						adenocarcinoma						8.8	1
CL2001032322AA	ca00191	Tumor						adenocarcinoma						23.4	1
CL2001032247AA	ca00191	Tumor						adenocarcinoma						35.4	0
CL2001040304AA	ca00191	Tumor						adenocarcinoma						30.1	1
CL2001031631AA	ca00191	Tumor						adenocarcinoma						32.6	1
CL2001032246AA	ca00191	Tumor						adenocarcinoma						15.2	1
CL2001032155AA	ca00191	Tumor						adenocarcinoma
CL2001042505AA	ca00191	Tumor						adenocarcinoma
CL2001031612AA	ca00191	Tumor						adenocarcinoma
CL2001032151AA	ca00191	Tumor						adenocarcinoma
CL2001032847AA	ca00191	Tumor						adenocarcinoma
CL2001032219AA	ca00191	Tumor						adenocarcinoma
CL2001031609AA	ca00191	Tumor						adenocarcinoma
CL2001032152AA	ca00191	Tumor						adenocarcinoma
CL2001032124AA	ca00191	Tumor						adenocarcinoma
CL2001032127AA	ca00191	Tumor						adenocarcinoma
CL2001032722AA	ca00191	Tumor						adenocarcinoma
CL2001032629AA	ca00191	Tumor						adenocarcinoma
CL2001032850AA	ca00191	Tumor						adenocarcinoma
CL2001032630AA	ca00191	Tumor						adenocarcinoma
CL2001032044AA	ca00191	Tumor						adenocarcinoma
CL2001032860AA	ca00191	Tumor						adenocarcinoma
CL2001032238AA	ca00191	Tumor						adenocarcinoma
CL2001042501AA	ca00191	Tumor						adenocarcinoma
CL2001032101AA	ca00191	Tumor						adenocarcinoma
CL2001032145AA	ca00191	Tumor						adenocarcinoma
CL2001032854AA	ca00191	Tumor						adenocarcinoma
CL2001032210AA	ca00191	Tumor						adenocarcinoma
CL2001032607AA	ca00191	Tumor						adenocarcinoma
CL2001032147AA	ca00191	Tumor						adenocarcinoma
CL2001032206AA	ca00191	Tumor						adenocarcinoma
CL2001032718AA	ca00191	Tumor						adenocarcinoma
CL2001032041AA	ca00191	Tumor						adenocarcinoma
CL2001032128AA	ca00191	Tumor						adenocarcinoma
CL2001032202AA	ca00191	Tumor						adenocarcinoma
CL2001032256AA	ca00191	Tumor						adenocarcinoma
CL2001032010AA	ca00191	Tumor						adenocarcinoma
CL2001032727AA	ca00191	Tumor						adenocarcinoma
CL2001032102AA	ca00191	Tumor						adenocarcinoma
CL2001032046AA	ca00191	Tumor						adenocarcinoma
CL2001032043AA	ca00191	Tumor						adenocarcinoma
CL2001032304AA	ca00191	Tumor						adenocarcinoma
CL2001032045AA	ca00191	Tumor						adenocarcinoma
CL2001032725AA	ca00191	Tumor						adenocarcinoma
CL2001032220AA	ca00191	Tumor						adenocarcinoma
CL2001032724AA	ca00191	Tumor						adenocarcinoma
CL2001032260AA	ca00191	Tumor						adenocarcinoma
CL2001032632AA	ca00191	Tumor						adenocarcinoma
CL2001032217AA	ca00191	Tumor						adenocarcinoma
CL2001032121AA	ca00191	Tumor						adenocarcinoma
CL2001032720AA	ca00191	Tumor						adenocarcinoma
CL2001031607AA	ca00191	Tumor						adenocarcinoma
CL2001032732AA	ca00191	Tumor						adenocarcinoma
CL2001032129AA	ca00191	Tumor						adenocarcinoma
CL2001032218AA	ca00191	Tumor						adenocarcinoma
CL2001032207AA	ca00191	Tumor						adenocarcinoma
CL2001032627AA	ca00191	Tumor						adenocarcinoma
CL2001032144AA	ca00191	Tumor						adenocarcinoma
CL2001032608AA	ca00191	Tumor						adenocarcinoma
CL2001031620AA	ca00191	Tumor						adenocarcinoma
CL2001032240AA	ca00191	Tumor						adenocarcinoma
CL2001032231AA	ca00191	Tumor						adenocarcinoma
CL2001032644AA	ca00191	Tumor						adenocarcinoma
CL2001031621AA	ca00191	Tumor						adenocarcinoma
CL2001032153AA	ca00191	Tumor						adenocarcinoma
CL2001032719AA	ca00191	Tumor						adenocarcinoma
CL2001032122AA	ca00191	Tumor						adenocarcinoma
CL2001032853AA	ca00191	Tumor						adenocarcinoma
CL2001032239AA	ca00191	Tumor						adenocarcinoma
CL2001031606AA	ca00191	Tumor						adenocarcinoma
CL2001032222AA	ca00191	Tumor						adenocarcinoma
CL2001032305AA	ca00191	Tumor						adenocarcinoma
CL2001032209AA	ca00191	Tumor						adenocarcinoma
GSM258551	GSE10245	Tumor						adenocarcinoma						18.1	1
GSM258552	GSE10245	Tumor						adenocarcinoma						60.6	0
GSM258554	GSE10245	Tumor						adenocarcinoma						22.4	1
GSM258558	GSE10245	Tumor						adenocarcinoma						47.6	0
GSM258559	GSE10245	Tumor						adenocarcinoma						31.2	1
GSM258560	GSE10245	Tumor						adenocarcinoma						33.6	1
GSM258561	GSE10245	Tumor						adenocarcinoma						14.7	1
GSM258564	GSE10245	Tumor						adenocarcinoma						32.4	1
GSM258567	GSE10245	Tumor						adenocarcinoma						44.2	0
GSM258568	GSE10245	Tumor						adenocarcinoma						41	1
GSM258569	GSE10245	Tumor						adenocarcinoma						58.5	0
GSM258571	GSE10245	Tumor						adenocarcinoma						58.4	0
GSM258572	GSE10245	Tumor						adenocarcinoma						36.6	0
GSM258573	GSE10245	Tumor						adenocarcinoma						39.4	0
GSM258574	GSE10245	Tumor						adenocarcinoma						32.2	0
GSM258575	GSE10245	Tumor						adenocarcinoma						50.3	0
GSM258576	GSE10245	Tumor						adenocarcinoma						46.9	0
GSM258577	GSE10245	Tumor						adenocarcinoma						21.9	1
GSM258579	GSE10245	Tumor						adenocarcinoma						36.8	0
GSM258581	GSE10245	Tumor						adenocarcinoma						40.8	0
GSM258582	GSE10245	Tumor						adenocarcinoma						39.7	0
GSM258584	GSE10245	Tumor						adenocarcinoma						4.2	0
GSM258586	GSE10245	Tumor						adenocarcinoma						36.3	0
GSM258587	GSE10245	Tumor						adenocarcinoma						34.9	1
GSM258588	GSE10245	Tumor						adenocarcinoma						8.2	1
GSM258589	GSE10245	Tumor						adenocarcinoma						14.7	1
GSM258591	GSE10245	Tumor						adenocarcinoma						14.9	1
GSM258592	GSE10245	Tumor						adenocarcinoma						4.3	1
GSM258593	GSE10245	Tumor						adenocarcinoma						21.8	1
GSM258595	GSE10245	Tumor						adenocarcinoma						9.5	1
GSM258597	GSE10245	Tumor						adenocarcinoma						6.6	1
GSM258598	GSE10245	Tumor						adenocarcinoma						15.7	1
GSM258600	GSE10245	Tumor						adenocarcinoma						28	0
GSM258601	GSE10245	Tumor						adenocarcinoma						20.5	1
GSM258602	GSE10245	Tumor						adenocarcinoma						21.4	0
GSM258604	GSE10245	Tumor						adenocarcinoma						23.9	0
GSM258605	GSE10245	Tumor						adenocarcinoma						22.4	0
GSM258606	GSE10245	Tumor						adenocarcinoma						7.9	0
GSM258607	GSE10245	Tumor						adenocarcinoma						22.8	0
GSM258608	GSE10245	Tumor						adenocarcinoma						24.4	0
GSM258553	GSE10245	Tumor						squamous_cell_carcinoma						70.6	0
GSM258555	GSE10245	Tumor						squamous_cell_carcinoma						60.7	0
GSM258556	GSE10245	Tumor						squamous_cell_carcinoma						62.7	0
GSM258557	GSE10245	Tumor						squamous_cell_carcinoma						50.9	0
GSM258562	GSE10245	Tumor						squamous_cell_carcinoma						10.5	1
GSM258563	GSE10245	Tumor						squamous_cell_carcinoma						52.8	0
GSM258565	GSE10245	Tumor						squamous_cell_carcinoma						40.3	0
GSM258566	GSE10245	Tumor						squamous_cell_carcinoma						56	0
GSM258570	GSE10245	Tumor						squamous_cell_carcinoma						6.8	1
GSM258578	GSE10245	Tumor						squamous_cell_carcinoma						43.8	0
GSM258580	GSE10245	Tumor						squamous_cell_carcinoma						37.1	0
GSM258583	GSE10245	Tumor						squamous_cell_carcinoma						43.6	0
GSM258585	GSE10245	Tumor						squamous_cell_carcinoma						37.8	0
GSM258590	GSE10245	Tumor						squamous_cell_carcinoma						19.4	1
GSM258594	GSE10245	Tumor						squamous_cell_carcinoma						28.5	0
GSM258596	GSE10245	Tumor						squamous_cell_carcinoma						18.7	0
GSM258599	GSE10245	Tumor						squamous_cell_carcinoma						28.2	0
GSM258603	GSE10245	Tumor						squamous_cell_carcinoma						24.3	1
GSM16557	GSE1037	Tumor						adenocarcinoma						43	0
GSM16558	GSE1037	Tumor						adenocarcinoma						40	0
GSM16559	GSE1037	Tumor						adenocarcinoma						41	0
GSM16560	GSE1037	Tumor						adenocarcinoma						39	0
GSM16561	GSE1037	Tumor						adenocarcinoma						42	0
GSM16562	GSE1037	Tumor						adenocarcinoma						39	0
GSM16563	GSE1037	Tumor						adenocarcinoma						38	0
GSM16564	GSE1037	Tumor						adenocarcinoma						36	0
GSM16565	GSE1037	Tumor						adenocarcinoma						36	0
GSM16566	GSE1037	Tumor						adenocarcinoma						36	1
GSM16567	GSE1037	Tumor						adenocarcinoma						41	0
GSM16568	GSE1037	Tumor						adenocarcinoma						38	0
GSM18306	GSE1037	Tumor						adenocarcinoma						80	0
GSM18307	GSE1037	Tumor						adenocarcinoma						5	1
GSM18308	GSE1037	Tumor						adenocarcinoma						61	0
GSM18309	GSE1037	Tumor						adenocarcinoma						65	0
GSM17350	GSE1037	Tumor						adenocarcinoma						47	0
GSM18310	GSE1037	Tumor						adenocarcinoma						3	1
GSM17351	GSE1037	Tumor						adenocarcinoma						8	1
GSM17352	GSE1037	Tumor						adenocarcinoma						49	0
GSM17353	GSE1037	Tumor						adenocarcinoma						37	0
GSM17354	GSE1037	Tumor						adenocarcinoma						44	0
GSM17355	GSE1037	Tumor						adenocarcinoma						39	0
GSM17356	GSE1037	Tumor						adenocarcinoma						10	0
GSM17327	GSE1037	Tumor						adenocarcinoma						63	1
GSM17328	GSE1037	Tumor						adenocarcinoma						6	1
GSM17329	GSE1037	Tumor						adenocarcinoma						5	1
GSM17330	GSE1037	Tumor						adenocarcinoma						27	1
GSM17331	GSE1037	Tumor						adenocarcinoma						19	0
GSM17332	GSE1037	Tumor						adenocarcinoma						13	1
GSM17333	GSE1037	Tumor						adenocarcinoma						29	0
GSM17334	GSE1037	Tumor						adenocarcinoma						14	1
GSM17287	GSE1037	Tumor						adenocarcinoma
GSM17288	GSE1037	Tumor						adenocarcinoma
GSM17289	GSE1037	Tumor						adenocarcinoma
GSM17290	GSE1037	Tumor						adenocarcinoma
GSM17291	GSE1037	Tumor						adenocarcinoma
GSM17292	GSE1037	Tumor						adenocarcinoma
GSM17293	GSE1037	Tumor						adenocarcinoma
GSM17294	GSE1037	Tumor						adenocarcinoma
GSM17295	GSE1037	Tumor						adenocarcinoma
GSM17296	GSE1037	Tumor						adenocarcinoma
GSM17297	GSE1037	Tumor						adenocarcinoma
GSM17298	GSE1037	Tumor						adenocarcinoma
GSM17299	GSE1037	Tumor						adenocarcinoma
GSM17300	GSE1037	Tumor						adenocarcinoma
GSM17301	GSE1037	Tumor						adenocarcinoma
GSM17302	GSE1037	Tumor						adenocarcinoma
GSM17303	GSE1037	Tumor						adenocarcinoma
GSM17304	GSE1037	Tumor						adenocarcinoma
GSM17305	GSE1037	Tumor						adenocarcinoma
GSM17335	GSE1037	Tumor						adenocarcinoma						12	1
GSM17336	GSE1037	Tumor						adenocarcinoma						38	1
GSM17337	GSE1037	Tumor						adenocarcinoma						35	1
GSM17338	GSE1037	Tumor						adenocarcinoma						29	1
GSM17339	GSE1037	Tumor						adenocarcinoma						46	0
GSM17340	GSE1037	Tumor						adenocarcinoma						1	1
GSM17341	GSE1037	Tumor						adenocarcinoma						39	1
GSM17342	GSE1037	Tumor						adenocarcinoma						3	1
GSM17343	GSE1037	Tumor						adenocarcinoma						48	0
GSM17344	GSE1037	Tumor						adenocarcinoma						27	1
GSM17345	GSE1037	Tumor						adenocarcinoma						23	1
GSM17346	GSE1037	Tumor						adenocarcinoma						39	0
GSM17347	GSE1037	Tumor						adenocarcinoma						37	0
GSM17348	GSE1037	Tumor						adenocarcinoma						34	0
GSM17349	GSE1037	Tumor						adenocarcinoma						9	0
GSM17195	GSE1037	Tumor						adenocarcinoma
GSM17196	GSE1037	Tumor						adenocarcinoma
GSM17306	GSE1037	Tumor						adenocarcinoma
GSM17307	GSE1037	Tumor						adenocarcinoma
GSM17308	GSE1037	Tumor						adenocarcinoma
GSM17309	GSE1037	Tumor						adenocarcinoma
GSM17310	GSE1037	Tumor						adenocarcinoma
GSM17311	GSE1037	Tumor						adenocarcinoma
GSM17312	GSE1037	Tumor						adenocarcinoma
GSM17313	GSE1037	Tumor						adenocarcinoma
GSM17314	GSE1037	Tumor						adenocarcinoma
GSM18311	GSE1037	Tumor						adenocarcinoma						61	0
GSM18312	GSE1037	Tumor						adenocarcinoma						13	1
GSM17315	GSE1037	Tumor						adenocarcinoma						88	0
GSM17316	GSE1037	Tumor						adenocarcinoma						60	0
GSM17317	GSE1037	Tumor						adenocarcinoma						66	0
GSM17318	GSE1037	Tumor						adenocarcinoma						61	0
GSM17319	GSE1037	Tumor						adenocarcinoma						54	0
GSM17320	GSE1037	Tumor						adenocarcinoma						37	0
GSM17321	GSE1037	Tumor						adenocarcinoma						32	0
GSM17322	GSE1037	Tumor						adenocarcinoma						30	0
GSM17323	GSE1037	Tumor						adenocarcinoma						30	0
GSM17324	GSE1037	Tumor						adenocarcinoma						17	0
GSM17325	GSE1037	Tumor						adenocarcinoma						10	0
GSM17326	GSE1037	Tumor						adenocarcinoma						4	0
GSM272754	GSE10799	Tumor						adenocarcinoma
GSM272755	GSE10799	Tumor						adenocarcinoma
GSM272756	GSE10799	Tumor						adenocarcinoma
GSM272757	GSE10799	Tumor						adenocarcinoma
GSM272758	GSE10799	Tumor						adenocarcinoma
GSM272759	GSE10799	Tumor						adenocarcinoma
GSM272760	GSE10799	Tumor						adenocarcinoma
GSM272761	GSE10799	Tumor						adenocarcinoma
GSM272762	GSE10799	Tumor						adenocarcinoma
GSM272763	GSE10799	Tumor						adenocarcinoma
GSM272764	GSE10799	Tumor						adenocarcinoma
GSM272765	GSE10799	Tumor						adenocarcinoma
GSM272766	GSE10799	Tumor						adenocarcinoma
GSM272767	GSE10799	Tumor						adenocarcinoma
GSM272768	GSE10799	Tumor						adenocarcinoma
GSM272769	GSE10799	Tumor						adenocarcinoma
GSM272770	GSE10799	Normal						adenocarcinoma
GSM272771	GSE10799	Normal						adenocarcinoma
GSM272772	GSE10799	Normal						adenocarcinoma
GSM280530	GSE11117	Tumor						adenocarcinoma						28.9774	0
GSM280531	GSE11117	Tumor						adenocarcinoma
GSM280532	GSE11117	Tumor						adenocarcinoma
GSM280533	GSE11117	Tumor						adenocarcinoma						22.078	0
GSM280534	GSE11117	Tumor						adenocarcinoma
GSM280535	GSE11117	Tumor						adenocarcinoma						2.62834	1
GSM280536	GSE11117	Tumor						adenocarcinoma						0.985626	1
GSM280537	GSE11117	Tumor						adenocarcinoma						43.499	0
GSM280538	GSE11117	Tumor						adenocarcinoma						22.5708	0
GSM280539	GSE11117	Tumor						adenocarcinoma						15.6386	1
GSM280540	GSE11117	Tumor						adenocarcinoma						32.3285	0
GSM280541	GSE11117	Tumor						adenocarcinoma						8.93634	1
GSM280542	GSE11117	Tumor						adenocarcinoma						16.7228	0
GSM280543	GSE11117	Tumor						adenocarcinoma						19.0226	0
GSM280544	GSE11117	Tumor						adenocarcinoma						13.6016	1
GSM280545	GSE11117	Tumor						adenocarcinoma						12.8789	1
GSM280546	GSE11117	Tumor						adenocarcinoma						4.56674	1
GSM280547	GSE11117	Tumor						adenocarcinoma						5.38809	1
GSM280548	GSE11117	Tumor						adenocarcinoma						8.08214	1
GSM280549	GSE11117	Tumor						adenocarcinoma						39.0308	0
GSM280550	GSE11117	Tumor						adenocarcinoma						20.8296	0
GSM280551	GSE11117	Tumor						adenocarcinoma
GSM280552	GSE11117	Tumor						adenocarcinoma						15.2772	1
GSM280553	GSE11117	Tumor						adenocarcinoma						5.61807	1
GSM280554	GSE11117	Tumor						adenocarcinoma						11.269	1
GSM280555	GSE11117	Tumor						adenocarcinoma						32.8871	0
GSM280556	GSE11117	Tumor						adenocarcinoma
GSM280557	GSE11117	Tumor						adenocarcinoma						31.8686	0
GSM280558	GSE11117	Tumor						adenocarcinoma						8.9692	1
GSM280559	GSE11117	Tumor						adenocarcinoma						2.89117	1
GSM280560	GSE11117	Tumor						adenocarcinoma						13.7331	0
GSM280561	GSE11117	Tumor						adenocarcinoma						19.3511	0
GSM280562	GSE11117	Tumor						adenocarcinoma						6.17659	1
GSM280563	GSE11117	Tumor						adenocarcinoma						21.9138	0
GSM280564	GSE11117	Tumor						adenocarcinoma
GSM280565	GSE11117	Tumor						adenocarcinoma						16.3614	0
GSM280566	GSE11117	Tumor						adenocarcinoma						5.25667	1
GSM280567	GSE11117	Tumor						adenocarcinoma						19.9425	0
GSM280568	GSE11117	Tumor						adenocarcinoma
GSM280569	GSE11117	Tumor						adenocarcinoma						2.43121	1
GSM280570	GSE11117	Tumor						adenocarcinoma						16.9528	0
GSM280571	GSE11117	Tumor						adenocarcinoma
GSM280572	GSE11117	Tumor						adenocarcinoma
GSM280573	GSE11117	Tumor						adenocarcinoma						4.20534	1
GSM280574	GSE11117	Tumor						adenocarcinoma						21.1581	0
GSM280575	GSE11117	Tumor						adenocarcinoma
GSM280576	GSE11117	Tumor						adenocarcinoma						10.2505	1
GSM280577	GSE11117	Tumor						adenocarcinoma						7.3922	1
GSM280578	GSE11117	Tumor						adenocarcinoma
GSM280579	GSE11117	Tumor						adenocarcinoma
GSM280580	GSE11117	Tumor						adenocarcinoma
GSM280581	GSE11117	Tumor						adenocarcinoma						1.97125	1
GSM280582	GSE11117	Tumor						adenocarcinoma						10.7105	1
GSM280583	GSE11117	Tumor						adenocarcinoma
GSM280584	GSE11117	Tumor						adenocarcinoma
GSM280585	GSE11117	Tumor						adenocarcinoma						2.23409	1
GSM302996	GSE11969	Tumor	71	M				adenocarcinoma	T2	N0	M0	Stage I	Stage IB	43.6184	1
GSM302997	GSE11969	Tumor	49	F				adenocarcinoma	T1	N0	M0	Stage I	Stage IA	107.73	0
GSM302998	GSE11969	Tumor	51	F				adenocarcinoma	T2	N2	M0	Stage III	Stage IIIA	55.4934	1
GSM302999	GSE11969	Tumor	51	F				adenocarcinoma	T1	N1	M0	Stage II	Stage IIA	105.724	0
GSM303000	GSE11969	Tumor	67	F				adenocarcinoma	T1	N2	M0	Stage III	Stage IIIA	39.4737	1
GSM303001	GSE11969	Tumor	66	M				adenocarcinoma	T3	N1	M0	Stage III	Stage IIIA	7.33553	1
GSM303002	GSE11969	Tumor	71	F				adenocarcinoma	T1	N0	M0	Stage I	Stage IA	106.743	0
GSM303003	GSE11969	Tumor	62	F				adenocarcinoma	T4	N0	M0	Stage III	Stage IIIB	107.697	0
GSM303004	GSE11969	Tumor	47	F				adenocarcinoma	T2	N2	M0	Stage III	Stage IIIA	16.8092	1
GSM303005	GSE11969	Tumor	60	F				adenocarcinoma	T1	N0	M0	Stage I	Stage IA	106.743	0
GSM303006	GSE11969	Tumor	64	F				adenocarcinoma	T2	N0	M0	Stage I	Stage IB	108.388	0
GSM303007	GSE11969	Tumor	57	M				adenocarcinoma	T2	N2	M0	Stage III	Stage IIIA	107.237	0
GSM303008	GSE11969	Tumor	55	F				adenocarcinoma	T3	N0	M0	Stage II	Stage IIB	61.0197	1
GSM303009	GSE11969	Tumor	74	M				adenocarcinoma	T1	N2	M0	Stage III	Stage IIIA	22.8289	1
GSM303010	GSE11969	Tumor	61	M				adenocarcinoma	T1	N0	M0	Stage I	Stage IA	106.776	0
GSM303011	GSE11969	Tumor	67	F				adenocarcinoma	T2	N0	M0	Stage I	Stage IB	104.243	0
GSM303012	GSE11969	Tumor	63	F				adenocarcinoma	T1	N0	M0	Stage I	Stage IA	103.98	0
GSM303013	GSE11969	Tumor	59	M				adenocarcinoma	T2	N0	M0	Stage I	Stage IB	33.8816	1
GSM303014	GSE11969	Tumor	66	M				adenocarcinoma	T1	N2	M0	Stage III	Stage IIIA	69.1447	1
GSM303015	GSE11969	Tumor	68	F				adenocarcinoma	T2	N2	M0	Stage III	Stage IIIA	100.559	0
GSM303016	GSE11969	Tumor	64	M				adenocarcinoma	T1	N0	M0	Stage I	Stage IA	104.671	0
GSM303017	GSE11969	Tumor	70	F				adenocarcinoma	T1	N0	M0	Stage I	Stage IA	98.9803	0
GSM303018	GSE11969	Tumor	43	M				adenocarcinoma	T2	N0	M0	Stage I	Stage IB	98.8158	0
GSM303019	GSE11969	Tumor	73	M				adenocarcinoma	T1	N2	M0	Stage III	Stage IIIA	104.276	0
GSM303020	GSE11969	Tumor	72	M				adenocarcinoma	T2	N0	M0	Stage I	Stage IB	97.8289	0
GSM303021	GSE11969	Tumor	56	M				adenocarcinoma	T1	N0	M0	Stage I	Stage IA	94.7039	0
GSM303022	GSE11969	Tumor	75	M				adenocarcinoma	T3	N0	M0	Stage II	Stage IIB	41.8092	1
GSM303023	GSE11969	Tumor	61	M				adenocarcinoma	T1	N0	M0	Stage I	Stage IA	94.5066	0
GSM303024	GSE11969	Tumor	62	M				adenocarcinoma	T2	N1	M0	Stage II	Stage IIB	97.9934	0
GSM303025	GSE11969	Tumor	61	M				adenocarcinoma	T2	N0	M0	Stage I	Stage IB	95.5592	0
GSM303026	GSE11969	Tumor	32	F				adenocarcinoma	T4	N2	M0	Stage III	Stage IIIB	94.9013	1
GSM303027	GSE11969	Tumor	53	M				adenocarcinoma	T1	N0	M0	Stage I	Stage IA	88.8487	0
GSM303028	GSE11969	Tumor	66	M				adenocarcinoma	T4	N0	M0	Stage III	Stage IIIB	29.4737	1
GSM303029	GSE11969	Tumor	55	F				adenocarcinoma	T3	N2	M0	Stage III	Stage IIIA	95.7237	0
GSM303030	GSE11969	Tumor	62	M				adenocarcinoma	T3	N0	M0	Stage II	Stage IIB	92.5329	0
GSM303031	GSE11969	Tumor	64	F				adenocarcinoma	T2	N0	M0	Stage I	Stage IB	90.4276	0
GSM303032	GSE11969	Tumor	63	F				adenocarcinoma	T1	N0	M0	Stage I	Stage IA	96.4474	0
GSM303033	GSE11969	Tumor	69	F				adenocarcinoma	T2	N0	M0	Stage I	Stage IB	45.6908	1
GSM303034	GSE11969	Tumor	52	F				adenocarcinoma	T2	N0	M0	Stage I	Stage IB	91.9737	0
GSM303035	GSE11969	Tumor	52	F				adenocarcinoma	T2	N2	M0	Stage III	Stage IIIA	11.875	1
GSM303036	GSE11969	Tumor	62	M				adenocarcinoma	T2	N2	M0	Stage III	Stage IIIA	13.0592	1
GSM303037	GSE11969	Tumor	62	M				adenocarcinoma	T1	N0	M0	Stage I	Stage IA	82.4342	0
GSM303038	GSE11969	Tumor	67	M				adenocarcinoma	T2	N0	M0	Stage I	Stage IB	79.8026	0
GSM303039	GSE11969	Tumor	63	F				adenocarcinoma	T1	N2	M0	Stage III	Stage IIIA	72.1382	1
GSM303040	GSE11969	Tumor	49	F				adenocarcinoma	T2	N0	M0	Stage I	Stage IB	92.0066	0
GSM303041	GSE11969	Tumor	59	F				adenocarcinoma	T2	N1	M0	Stage II	Stage IIB	77.4671	0
GSM303042	GSE11969	Tumor	46	M				adenocarcinoma	T1	N1	M0	Stage II	Stage IIA	89.7697	0
GSM303043	GSE11969	Tumor	61	F				adenocarcinoma	T1	N0	M0	Stage I	Stage IA	88.8816	0
GSM303044	GSE11969	Tumor	35	F				adenocarcinoma	T4	N2	M0	Stage III	Stage IIIB	20.9211	1
GSM303045	GSE11969	Tumor	76	M				adenocarcinoma	T2	N0	M0	Stage I	Stage IB	27.2368	1
GSM303046	GSE11969	Tumor	76	F				adenocarcinoma	T2	N0	M0	Stage I	Stage IB	88.8816	0
GSM303047	GSE11969	Tumor	84	F				adenocarcinoma	T2	N0	M0	Stage I	Stage IB	80.7895	0
GSM303048	GSE11969	Tumor	64	M				adenocarcinoma	T2	N2	M0	Stage III	Stage IIIA	25.7895	1
GSM303049	GSE11969	Tumor	53	F				adenocarcinoma	T4	N2	M0	Stage III	Stage IIIB	19.6053	1
GSM303050	GSE11969	Tumor	53	F				adenocarcinoma	T1	N2	M0	Stage III	Stage IIIA	82.8947	0
GSM303051	GSE11969	Tumor	62	F				adenocarcinoma	T2	N0	M0	Stage I	Stage IB	77.2039	1
GSM303052	GSE11969	Tumor	73	F				adenocarcinoma	T2	N0	M0	Stage I	Stage IB	61.8421	1
GSM303053	GSE11969	Tumor	47	M				adenocarcinoma	T1	N0	M0	Stage I	Stage IA	67.4342	1
GSM303054	GSE11969	Tumor	74	M				adenocarcinoma	T2	N0	M0	Stage I	Stage IB	68.1579	0
GSM303055	GSE11969	Tumor	56	M				adenocarcinoma	T2	N0	M0	Stage I	Stage IB	14.4737	1
GSM303056	GSE11969	Tumor	69	M				adenocarcinoma	T1	N0	M0	Stage I	Stage IA	83.0592	0
GSM303057	GSE11969	Tumor	68	M				adenocarcinoma	T1	N1	M0	Stage II	Stage IIA	15.8553	1
GSM303058	GSE11969	Tumor	41	M				adenocarcinoma	T1	N0	M0	Stage I	Stage IA	38.2895	1
GSM303059	GSE11969	Tumor	55	M				adenocarcinoma	T1	N0	M0	Stage I	Stage IA	83.3224	0
GSM303060	GSE11969	Tumor	60	F				adenocarcinoma	T1	N0	M0	Stage I	Stage IA	83.1579	0
GSM303061	GSE11969	Tumor	66	M				adenocarcinoma	T1	N0	M0	Stage I	Stage IA	77.4013	0
GSM303062	GSE11969	Tumor	42	F				adenocarcinoma	T1	N0	M0	Stage I	Stage IA	82.4671	0
GSM303063	GSE11969	Tumor	56	M				adenocarcinoma	T3	N0	M0	Stage II	Stage IIB	82.8618	0
GSM303064	GSE11969	Tumor	50	F				adenocarcinoma	T1	N0	M0	Stage I	Stage IA	82.9276	0
GSM303065	GSE11969	Tumor	70	F				adenocarcinoma	T1	N2	M0	Stage III	Stage IIIA	49.375	1
GSM303066	GSE11969	Tumor	61	M				adenocarcinoma	T1	N0	M0	Stage I	Stage IA	74.3421	0
GSM303067	GSE11969	Tumor	63	M				adenocarcinoma	T2	N2	M0	Stage III	Stage IIIA	76.9408	0
GSM303068	GSE11969	Tumor	60	F				adenocarcinoma	T2	N0	M0	Stage I	Stage IB	40.4276	1
GSM303069	GSE11969	Tumor	58	M				adenocarcinoma	T1	N0	M0	Stage I	Stage IA	77.0066	0
GSM303070	GSE11969	Tumor	60	M				adenocarcinoma	T2	N0	M0	Stage I	Stage IB	25.5592	1
GSM303071	GSE11969	Tumor	65	F				adenocarcinoma	T1	N0	M0	Stage I	Stage IA	43.8487	1
GSM303072	GSE11969	Tumor	60	F				adenocarcinoma	T1	N0	M0	Stage I	Stage IA	77.2368	0
GSM303073	GSE11969	Tumor	82	M				adenocarcinoma	T2	N0	M0	Stage I	Stage IB	33.1579	1
GSM303074	GSE11969	Tumor	67	M				adenocarcinoma	T3	N0	M0	Stage II	Stage IIB	39.5066	1
GSM303075	GSE11969	Tumor	67	F				adenocarcinoma	T2	N0	M0	Stage I	Stage IB	64.3421	0
GSM303076	GSE11969	Tumor	60	F				adenocarcinoma	T2	N2	M0	Stage III	Stage IIIA	24.6382	1
GSM303077	GSE11969	Tumor	66	M				adenocarcinoma	T1	N0	M0	Stage I	Stage IA	76.8092	0
GSM303078	GSE11969	Tumor	73	M				adenocarcinoma	T1	N1	M0	Stage II	Stage IIA	28.2895	1
GSM303079	GSE11969	Tumor	74	M				adenocarcinoma	T2	N0	M0	Stage I	Stage IB	6.11842	1
GSM303080	GSE11969	Tumor	56	M				adenocarcinoma	T3	N0	M0	Stage II	Stage IIB	77.0395	0
GSM303081	GSE11969	Tumor	49	F				adenocarcinoma	T1	N2	M0	Stage III	Stage IIIA	35.3289	1
GSM303082	GSE11969	Tumor	60	F				adenocarcinoma	T2	N1	M0	Stage II	Stage IIB	28.5197	1
GSM303083	GSE11969	Tumor	53	M				adenocarcinoma	T2	N2	M0	Stage III	Stage IIIA	10	1
GSM303084	GSE11969	Tumor	51	M				adenocarcinoma	T1	N0	M0	Stage I	Stage IA	29.8026	1
GSM303085	GSE11969	Tumor	74	M				adenocarcinoma	T1	N0	M0	Stage I	Stage IA	15.6908	1
GSM303086	GSE11969	Tumor	71	M				AS	T2	N2	M0	Stage III	Stage IIIA	46.875	1
GSM303087	GSE11969	Tumor	71	M				AS	T3	N1	M0	Stage III	Stage IIIA	10.1645	1
GSM303088	GSE11969	Tumor	52	M				AS	T1	N0	M0	Stage I	Stage IA	79.8684	1
GSM303089	GSE11969	Tumor	73	M				AS	T1	N0	M0	Stage I	Stage IA	100.855	0
GSM303090	GSE11969	Tumor	68	M				LA	T2	N0	M0	Stage I	Stage IB	107.336	0
GSM303091	GSE11969	Tumor	69	M				LA	T1	N1	M0	Stage II	Stage IIA	106.513	0
GSM303092	GSE11969	Tumor	76	M				LA	T2	N1	M0	Stage II	Stage IIB	2.46711	1
GSM303093	GSE11969	Tumor	63	M				LA	T3	N0	M0	Stage II	Stage IIB	6.51316	1
GSM303094	GSE11969	Tumor	46	F				LA	T2	N3	M0	Stage III	Stage IIIB	21.7105	1
GSM303095	GSE11969	Tumor	63	M				LA	T2	N3	M0	Stage III	Stage IIIB	13.8816	1
GSM303096	GSE11969	Tumor	52	M				LA	T1	N0	M0	Stage I	Stage IA	89.2434	0
GSM303097	GSE11969	Tumor	64	F				LA	T3	N0	M0	Stage II	Stage IIB	9.76974	1
GSM303098	GSE11969	Tumor	68	M				LA	T3	N0	M0	Stage II	Stage IIB	4.17763	1
GSM303099	GSE11969	Tumor	41	M				LA	T3	N0	M0	Stage II	Stage IIB	89.2105	0
GSM303100	GSE11969	Tumor	43	M				LA	T2	N0	M0	Stage I	Stage IB	88.1908	0
GSM303101	GSE11969	Tumor	60	M				LA	T2	N2	M0	Stage III	Stage IIIA	4.40789	1
GSM303102	GSE11969	Tumor	72	M				LA	T2	N1	M0	Stage II	Stage IIB	47.8289	1
GSM303103	GSE11969	Tumor	56	F				LA	T2	N1	M0	Stage II	Stage IIB	88.4211	0
GSM303104	GSE11969	Tumor	52	M				LA	T2	N0	M0	Stage I	Stage IB	82.9276	0
GSM303105	GSE11969	Tumor	46	M				LA	T1	N2	M0	Stage III	Stage IIIA	12.3026	1
GSM303106	GSE11969	Tumor	71	M				LA	T2	N0	M0	Stage I	Stage IB	86.6447	0
GSM303107	GSE11969	Tumor	77	M				LA	T2	N0	M0	Stage I	Stage IB	77.4013	0
GSM303108	GSE11969	Tumor	71	M				LCNEC	T4	N0	M0	Stage III	Stage IIIB	7.53289	1
GSM303109	GSE11969	Tumor	69	M				LCNEC	T2	N0	M0	Stage I	Stage IB	25.9868	1
GSM303110	GSE11969	Tumor	74	F				squamous_cell_carcinoma	T2	N0	M0	Stage I	Stage IB	112.796	0
GSM303111	GSE11969	Tumor	61	M				squamous_cell_carcinoma	T3	N0	M0	Stage II	Stage IIB	118.289	0
GSM303112	GSE11969	Tumor	63	M				squamous_cell_carcinoma	T2	N2	M0	Stage III	Stage IIIA	7.23684	1
GSM303113	GSE11969	Tumor	55	M				squamous_cell_carcinoma	T2	N0	M0	Stage I	Stage IB	51.4803	1
GSM303114	GSE11969	Tumor	75	M				squamous_cell_carcinoma	T2	N0	M0	Stage I	Stage IB	72.2368	1
GSM303115	GSE11969	Tumor	65	M				squamous_cell_carcinoma	T1	N0	M0	Stage I	Stage IA	92.6974	0
GSM303116	GSE11969	Tumor	61	M				squamous_cell_carcinoma	T2	N1	M0	Stage II	Stage IIB	107.961	0
GSM303117	GSE11969	Tumor	58	M				squamous_cell_carcinoma	T2	N2	M0	Stage III	Stage IIIA	106.513	0
GSM303118	GSE11969	Tumor	75	M				squamous_cell_carcinoma	T2	N0	M0	Stage I	Stage IB	25.1316	1
GSM303119	GSE11969	Tumor	62	M				squamous_cell_carcinoma	T1	N0	M0	Stage I	Stage IA	98.6184	0
GSM303120	GSE11969	Tumor	57	M				squamous_cell_carcinoma	T3	N1	M0	Stage III	Stage IIIA	51.1184	1
GSM303121	GSE11969	Tumor	59	M				squamous_cell_carcinoma	T3	N1	M0	Stage III	Stage IIIA	7.63158	1
GSM303122	GSE11969	Tumor	63	M				squamous_cell_carcinoma	T2	N1	M0	Stage II	Stage IIB	92.8618	0
GSM303123	GSE11969	Tumor	58	M				squamous_cell_carcinoma	T2	N1	M0	Stage II	Stage IIB	95	0
GSM303124	GSE11969	Tumor	67	M				squamous_cell_carcinoma	T2	N2	M0	Stage III	Stage IIIA	30.6908	1
GSM303125	GSE11969	Tumor	63	M				squamous_cell_carcinoma	T4	N1	M0	Stage III	Stage IIIB	14.6382	1
GSM303126	GSE11969	Tumor	55	M				squamous_cell_carcinoma	T3	N1	M0	Stage III	Stage IIIA	95.7237	0
GSM303127	GSE11969	Tumor	58	M				squamous_cell_carcinoma	T2	N0	M0	Stage I	Stage IB	94.9342	0
GSM303128	GSE11969	Tumor	47	M				squamous_cell_carcinoma	T1	N0	M0	Stage I	Stage IA	89.4079	0
GSM303129	GSE11969	Tumor	46	F				squamous_cell_carcinoma	T2	N0	M0	Stage I	Stage IB	29.2105	1
GSM303130	GSE11969	Tumor	70	M				squamous_cell_carcinoma	T2	N0	M0	Stage I	Stage IB	88.9803	0
GSM303131	GSE11969	Tumor	72	M				squamous_cell_carcinoma	T1	N0	M0	Stage I	Stage IA	83.75	1
GSM303132	GSE11969	Tumor	64	M				squamous_cell_carcinoma	T3	N0	M0	Stage II	Stage IIB	48.125	1
GSM303133	GSE11969	Tumor	77	M				squamous_cell_carcinoma	T2	N2	M0	Stage III	Stage IIIA	4.57237	1
GSM303134	GSE11969	Tumor	75	M				squamous_cell_carcinoma	T2	N0	M0	Stage I	Stage IB	82.6645	0
GSM303135	GSE11969	Tumor	69	M				squamous_cell_carcinoma	T4	N1	M0	Stage III	Stage IIIB	83.1579	1
GSM303136	GSE11969	Tumor	72	M				squamous_cell_carcinoma	T2	N0	M0	Stage I	Stage IB	0.822368	1
GSM303137	GSE11969	Tumor	68	M				squamous_cell_carcinoma	T2	N2	M0	Stage III	Stage IIIA	0.822368	1
GSM303138	GSE11969	Tumor	72	M				squamous_cell_carcinoma	T2	N0	M0	Stage I	Stage IB	83.3224	0
GSM303139	GSE11969	Tumor	79	M				squamous_cell_carcinoma	T2	N0	M0	Stage I	Stage IB	77.5658	0
GSM303140	GSE11969	Tumor	76	M				squamous_cell_carcinoma	T1	N0	M0	Stage I	Stage IA	9.47368	1
GSM303141	GSE11969	Tumor	73	M				squamous_cell_carcinoma	T2	N2	M0	Stage III	Stage IIIA	61.25	1
GSM303142	GSE11969	Tumor	72	M				squamous_cell_carcinoma	T2	N0	M0	Stage I	Stage IB	22.4671	1
GSM303143	GSE11969	Tumor	56	M				squamous_cell_carcinoma	T2	N2	M0	Stage III	Stage IIIA	22.4671	1
GSM303144	GSE11969	Tumor	73	M				squamous_cell_carcinoma	T2	N2	M0	Stage III	Stage IIIA	26.1513	1
GSM303145	GSE11969	Tumor						SCLC
GSM303146	GSE11969	Tumor						SCLC
GSM303147	GSE11969	Tumor						SCLC
GSM303148	GSE11969	Tumor						SCLC
GSM303149	GSE11969	Tumor						SCLC
GSM303150	GSE11969	Tumor						SCLC
GSM303151	GSE11969	Tumor						SCLC
GSM303152	GSE11969	Tumor						SCLC
GSM303153	GSE11969	Tumor						SCLC
GSM303154	GSE11969	Tumor						Normal lung tissue
GSM303155	GSE11969	Tumor						Normal lung tissue
GSM303156	GSE11969	Tumor						Normal lung tissue
GSM303157	GSE11969	Tumor						Normal lung tissue
GSM303158	GSE11969	Tumor						Normal lung tissue
GSM333673	GSE13213	Tumor	71	M			ch1_site of relapse: PM;ch1_evidence of relapse: Y;ch1_k-ras status: Wt;ch1_p53 status: Wt;ch1_egfr status: Mut	adenocarcinoma	T2	N0	M0	Stage I	Stage IB	43.6184	1
GSM333674	GSE13213	Tumor	49	F			ch1_site of relapse: ;ch1_evidence of relapse: N;ch1_k-ras status: Wt;ch1_p53 status: Wt;ch1_egfr status: Wt	adenocarcinoma	T1	N0	M0	Stage I	Stage IA	107.73	0
GSM333675	GSE13213	Tumor					ch1_site of relapse: ;ch1_evidence of relapse: ;ch1_k-ras status: ;ch1_p53 status: ;ch1_egfr status:							55.4934	1
GSM333676	GSE13213	Tumor	51	F			ch1_site of relapse: ;ch1_evidence of relapse: N;ch1_k-ras status: Wt;ch1_p53 status: Wt;ch1_egfr status: Wt	adenocarcinoma	T1	N1	M0	Stage II	Stage IIA	105.724	0
GSM333677	GSE13213	Tumor	67	F			ch1_site of relapse: PM;ch1_evidence of relapse: Y;ch1_k-ras status: Wt;ch1_p53 status: Mut;ch1_egfr status: Mut	adenocarcinoma	T1	N2	M0	Stage III	Stage IIIA	39.4737	1
GSM333678	GSE13213	Tumor	66	M			ch1_site of relapse: Brain;ch1_evidence of relapse: Y;ch1_k-ras status: Wt;ch1_p53 status: Wt;ch1_egfr status: Mut	adenocarcinoma	T3	N1	M0	Stage III	Stage IIIA	7.33553	1
GSM333679	GSE13213	Tumor	71	F			ch1_site of relapse: ;ch1_evidence of relapse: N;ch1_k-ras status: Wt;ch1_p53 status: Wt;ch1_egfr status: Mut	adenocarcinoma	T1	N0	M0	Stage I	Stage IA	106.743	0
GSM333680	GSE13213	Tumor	62	F			ch1_site of relapse: ;ch1_evidence of relapse: N;ch1_k-ras status: Mut;ch1_p53 status: Wt;ch1_egfr status: Wt	adenocarcinoma	T4	N0	M0	Stage III	Stage IIIB	107.697	0
GSM333681	GSE13213	Tumor	47	F			ch1_site of relapse: Liver, adrenal;ch1_evidence of relapse: Y;ch1_k-ras status: Wt;ch1_p53 status: Wt;ch1_egfr status: Mut	adenocarcinoma	T2	N2	M0	Stage III	Stage IIIA	16.8092	1
GSM333682	GSE13213	Tumor	60	F			ch1_site of relapse: ;ch1_evidence of relapse: N;ch1_k-ras status: Wt;ch1_p53 status: Wt;ch1_egfr status: Wt	adenocarcinoma	T1	N0	M0	Stage I	Stage IA	106.743	0
GSM333683	GSE13213	Tumor	64	F			ch1_site of relapse: PM;ch1_evidence of relapse: Y;ch1_k-ras status: Wt;ch1_p53 status: Wt;ch1_egfr status: Mut	adenocarcinoma	T2	N0	M0	Stage I	Stage IB	108.388	0
GSM333684	GSE13213	Tumor	57	M			ch1_site of relapse: ;ch1_evidence of relapse: N;ch1_k-ras status: Wt;ch1_p53 status: Mut;ch1_egfr status: Mut	adenocarcinoma	T2	N2	M0	Stage III	Stage IIIA	107.237	0
GSM333685	GSE13213	Tumor	55	F			ch1_site of relapse: Liver;ch1_evidence of relapse: Y;ch1_k-ras status: Wt;ch1_p53 status: Mut;ch1_egfr status: Mut	adenocarcinoma	T3	N0	M0	Stage II	Stage IIB	61.0197	1
GSM333686	GSE13213	Tumor	74	M			ch1_site of relapse: LN (mediastinal);ch1_evidence of relapse: Y;ch1_k-ras status: Mut;ch1_p53 status: Wt;ch1_egfr status: Wt	adenocarcinoma	T1	N2	M0	Stage III	Stage IIIA	22.8289	1
GSM333687	GSE13213	Tumor	61	M			ch1_site of relapse: ;ch1_evidence of relapse: N;ch1_k-ras status: Wt;ch1_p53 status: Wt;ch1_egfr status: Wt	adenocarcinoma	T1	N0	M0	Stage I	Stage IA	106.776	0
GSM333688	GSE13213	Tumor	67	F			ch1_site of relapse: ;ch1_evidence of relapse: N;ch1_k-ras status: Wt;ch1_p53 status: Mut;ch1_egfr status: Wt	adenocarcinoma	T2	N0	M0	Stage I	Stage IB	104.243	0
GSM333689	GSE13213	Tumor	59	M			ch1_site of relapse: Local rec.;ch1_evidence of relapse: Y;ch1_k-ras status: Wt;ch1_p53 status: Wt;ch1_egfr status: Wt	adenocarcinoma	T2	N0	M0	Stage I	Stage IB	33.8816	1
GSM333690	GSE13213	Tumor	66	M			ch1_site of relapse: LN (mediastinal);ch1_evidence of relapse: Y;ch1_k-ras status: Wt;ch1_p53 status: Wt;ch1_egfr status: Wt	adenocarcinoma	T1	N2	M0	Stage III	Stage IIIA	69.1447	1
GSM333691	GSE13213	Tumor	68	F			ch1_site of relapse: ;ch1_evidence of relapse: N;ch1_k-ras status: Wt;ch1_p53 status: Wt;ch1_egfr status: Wt	adenocarcinoma	T2	N2	M0	Stage III	Stage IIIA	100.559	0
GSM333692	GSE13213	Tumor	64	M			ch1_site of relapse: ;ch1_evidence of relapse: N;ch1_k-ras status: Wt;ch1_p53 status: Mut;ch1_egfr status: Wt	adenocarcinoma	T1	N0	M0	Stage I	Stage IA	104.671	0
GSM333693	GSE13213	Tumor	43	M			ch1_site of relapse: ;ch1_evidence of relapse: N;ch1_k-ras status: Wt;ch1_p53 status: Wt;ch1_egfr status: Wt	adenocarcinoma	T2	N0	M0	Stage I	Stage IB	98.8158	0
GSM333694	GSE13213	Tumor	73	M			ch1_site of relapse: ;ch1_evidence of relapse: N;ch1_k-ras status: Wt;ch1_p53 status: Wt;ch1_egfr status: Wt	adenocarcinoma	T1	N2	M0	Stage III	Stage IIIA	104.276	0
GSM333695	GSE13213	Tumor	72	M			ch1_site of relapse: ;ch1_evidence of relapse: N;ch1_k-ras status: Wt;ch1_p53 status: Mut;ch1_egfr status: Wt	adenocarcinoma	T2	N0	M0	Stage I	Stage IB	97.8289	0
GSM333696	GSE13213	Tumor	56	M			ch1_site of relapse: ;ch1_evidence of relapse: N;ch1_k-ras status: Wt;ch1_p53 status: Wt;ch1_egfr status: Mut	adenocarcinoma	T1	N0	M0	Stage I	Stage IA	94.7039	0
GSM333697	GSE13213	Tumor	75	M			ch1_site of relapse: PM;ch1_evidence of relapse: Y;ch1_k-ras status: Wt;ch1_p53 status: Wt;ch1_egfr status: Mut	adenocarcinoma	T3	N0	M0	Stage II	Stage IIB	41.8092	1
GSM333698	GSE13213	Tumor	62	M			ch1_site of relapse: ;ch1_evidence of relapse: N;ch1_k-ras status: Wt;ch1_p53 status: Mut;ch1_egfr status: Wt	adenocarcinoma	T2	N1	M0	Stage II	Stage IIB	97.9934	0
GSM333699	GSE13213	Tumor	61	M			ch1_site of relapse: ;ch1_evidence of relapse: N;ch1_k-ras status: Mut;ch1_p53 status: Wt;ch1_egfr status: Wt	adenocarcinoma	T2	N0	M0	Stage I	Stage IB	95.5592	0
GSM333700	GSE13213	Tumor	32	F			ch1_site of relapse: PM;ch1_evidence of relapse: Y;ch1_k-ras status: Wt;ch1_p53 status: Wt;ch1_egfr status: Wt	adenocarcinoma	T4	N2	M0	Stage III	Stage IIIB	94.9013	1
GSM333701	GSE13213	Tumor	53	M			ch1_site of relapse: Bone;ch1_evidence of relapse: Y;ch1_k-ras status: Wt;ch1_p53 status: Wt;ch1_egfr status: Wt	adenocarcinoma	T1	N0	M0	Stage I	Stage IA	88.8487	0
GSM333702	GSE13213	Tumor	66	M			ch1_site of relapse: PM;ch1_evidence of relapse: Y;ch1_k-ras status: Mut;ch1_p53 status: Wt;ch1_egfr status: Wt	adenocarcinoma	T4	N0	M0	Stage III	Stage IIIB	29.4737	1
GSM333703	GSE13213	Tumor	55	F			ch1_site of relapse: LN (neck);ch1_evidence of relapse: Y;ch1_k-ras status: Wt;ch1_p53 status: Mut;ch1_egfr status: Wt	adenocarcinoma	T3	N2	M0	Stage III	Stage IIIA	95.7237	0
GSM333704	GSE13213	Tumor	62	M			ch1_site of relapse: ;ch1_evidence of relapse: N;ch1_k-ras status: Wt;ch1_p53 status: Wt;ch1_egfr status: Wt	adenocarcinoma	T3	N0	M0	Stage II	Stage IIB	92.5329	0
GSM333705	GSE13213	Tumor	64	F			ch1_site of relapse: ;ch1_evidence of relapse: N;ch1_k-ras status: Wt;ch1_p53 status: Wt;ch1_egfr status: Mut	adenocarcinoma	T2	N0	M0	Stage I	Stage IB	90.4276	0
GSM333706	GSE13213	Tumor	63	F			ch1_site of relapse: PM;ch1_evidence of relapse: Y;ch1_k-ras status: Wt;ch1_p53 status: Wt;ch1_egfr status: Mut	adenocarcinoma	T1	N0	M0	Stage I	Stage IA	96.4474	0
GSM333707	GSE13213	Tumor	69	F			ch1_site of relapse: Local rec.;ch1_evidence of relapse: Y;ch1_k-ras status: Wt;ch1_p53 status: Wt;ch1_egfr status: Mut	adenocarcinoma	T2	N0	M0	Stage I	Stage IB	45.6908	1
GSM333708	GSE13213	Tumor	52	F			ch1_site of relapse: ;ch1_evidence of relapse: N;ch1_k-ras status: Wt;ch1_p53 status: Wt;ch1_egfr status: Mut	adenocarcinoma	T2	N0	M0	Stage I	Stage IB	91.9737	0
GSM333709	GSE13213	Tumor	52	F			ch1_site of relapse: Bone;ch1_evidence of relapse: Y;ch1_k-ras status: Wt;ch1_p53 status: Wt;ch1_egfr status: Mut	adenocarcinoma	T2	N2	M0	Stage III	Stage IIIA	11.875	1
GSM333710	GSE13213	Tumor	62	M			ch1_site of relapse: PM;ch1_evidence of relapse: Y;ch1_k-ras status: Wt;ch1_p53 status: Mut;ch1_egfr status: Mut	adenocarcinoma	T2	N2	M0	Stage III	Stage IIIA	13.0592	1
GSM333711	GSE13213	Tumor	62	M			ch1_site of relapse: ;ch1_evidence of relapse: N;ch1_k-ras status: Wt;ch1_p53 status: Wt;ch1_egfr status: Wt	adenocarcinoma	T1	N0	M0	Stage I	Stage IA	82.4342	0
GSM333712	GSE13213	Tumor	67	M			ch1_site of relapse: ;ch1_evidence of relapse: N;ch1_k-ras status: Wt;ch1_p53 status: Wt;ch1_egfr status: Wt	adenocarcinoma	T2	N0	M0	Stage I	Stage IB	79.8026	0
GSM333713	GSE13213	Tumor	63	F			ch1_site of relapse: PM;ch1_evidence of relapse: Y;ch1_k-ras status: Wt;ch1_p53 status: Wt;ch1_egfr status: Wt	adenocarcinoma	T1	N2	M0	Stage III	Stage IIIA	72.1382	1
GSM333714	GSE13213	Tumor	49	F			ch1_site of relapse: Adrenal;ch1_evidence of relapse: Y;ch1_k-ras status: Wt;ch1_p53 status: Wt;ch1_egfr status: Mut	adenocarcinoma	T2	N0	M0	Stage I	Stage IB	92.0066	0
GSM333715	GSE13213	Tumor	59	F			ch1_site of relapse: Bone;ch1_evidence of relapse: Y;ch1_k-ras status: Wt;ch1_p53 status: Wt;ch1_egfr status: Mut	adenocarcinoma	T2	N1	M0	Stage II	Stage IIB	77.4671	0
GSM333716	GSE13213	Tumor	46	M			ch1_site of relapse: ;ch1_evidence of relapse: N;ch1_k-ras status: Wt;ch1_p53 status: Mut;ch1_egfr status: Mut	adenocarcinoma	T1	N1	M0	Stage II	Stage IIA	89.7697	0
GSM333717	GSE13213	Tumor	61	F			ch1_site of relapse: ;ch1_evidence of relapse: N;ch1_k-ras status: Wt;ch1_p53 status: Mut;ch1_egfr status: Mut	adenocarcinoma	T1	N0	M0	Stage I	Stage IA	88.8816	0
GSM333718	GSE13213	Tumor	35	F			ch1_site of relapse: Brain;ch1_evidence of relapse: Y;ch1_k-ras status: Wt;ch1_p53 status: Wt;ch1_egfr status: Wt	adenocarcinoma	T4	N2	M0	Stage III	Stage IIIB	20.9211	1
GSM333719	GSE13213	Tumor	76	M			ch1_site of relapse: ;ch1_evidence of relapse: Unknown;ch1_k-ras status: Mut;ch1_p53 status: Wt;ch1_egfr status: Wt	adenocarcinoma	T2	N0	M0	Stage I	Stage IB	27.2368	1
GSM333720	GSE13213	Tumor	76	F			ch1_site of relapse: ;ch1_evidence of relapse: N;ch1_k-ras status: Wt;ch1_p53 status: Mut;ch1_egfr status: Wt	adenocarcinoma	T2	N0	M0	Stage I	Stage IB	88.8816	0
GSM333721	GSE13213	Tumor	84	F			ch1_site of relapse: ;ch1_evidence of relapse: N;ch1_k-ras status: Wt;ch1_p53 status: Wt;ch1_egfr status: Wt	adenocarcinoma	T2	N0	M0	Stage I	Stage IB	80.7895	0
GSM333722	GSE13213	Tumor	64	M			ch1_site of relapse: LN (neck);ch1_evidence of relapse: Y;ch1_k-ras status: Mut;ch1_p53 status: Mut;ch1_egfr status: Wt	adenocarcinoma	T2	N2	M0	Stage III	Stage IIIA	25.7895	1
GSM333723	GSE13213	Tumor	53	F			ch1_site of relapse: ;ch1_evidence of relapse: N;ch1_k-ras status: Wt;ch1_p53 status: Wt;ch1_egfr status: Wt	adenocarcinoma	T4	N2	M0	Stage III	Stage IIIB	19.6053	1
GSM333724	GSE13213	Tumor	53	F			ch1_site of relapse: ;ch1_evidence of relapse: N;ch1_k-ras status: Wt;ch1_p53 status: Mut;ch1_egfr status: Mut	adenocarcinoma	T1	N2	M0	Stage III	Stage IIIA	82.8947	0
GSM333725	GSE13213	Tumor	62	F			ch1_site of relapse: PM;ch1_evidence of relapse: Y;ch1_k-ras status: Wt;ch1_p53 status: Wt;ch1_egfr status: Wt	adenocarcinoma	T2	N0	M0	Stage I	Stage IB	77.2039	1
GSM333726	GSE13213	Tumor	73	F			ch1_site of relapse: Local rec.;ch1_evidence of relapse: Y;ch1_k-ras status: Wt;ch1_p53 status: Wt;ch1_egfr status: Mut	adenocarcinoma	T2	N0	M0	Stage I	Stage IB	61.8421	1
GSM333727	GSE13213	Tumor	47	M			ch1_site of relapse: Brain;ch1_evidence of relapse: Y;ch1_k-ras status: Mut;ch1_p53 status: Mut;ch1_egfr status: Wt	adenocarcinoma	T1	N0	M0	Stage I	Stage IA	67.4342	1
GSM333728	GSE13213	Tumor	74	M			ch1_site of relapse: ;ch1_evidence of relapse: N;ch1_k-ras status: Wt;ch1_p53 status: Wt;ch1_egfr status: Wt	adenocarcinoma	T2	N0	M0	Stage I	Stage IB	68.1579	0
GSM333729	GSE13213	Tumor	56	M			ch1_site of relapse: LN (neck);ch1_evidence of relapse: Y;ch1_k-ras status: Wt;ch1_p53 status: Mut;ch1_egfr status: Wt	adenocarcinoma	T2	N0	M0	Stage I	Stage IB	14.4737	1
GSM333730	GSE13213	Tumor	69	M			ch1_site of relapse: ;ch1_evidence of relapse: N;ch1_k-ras status: Wt;ch1_p53 status: Wt;ch1_egfr status: Wt	adenocarcinoma	T1	N0	M0	Stage I	Stage IA	83.0592	0
GSM333731	GSE13213	Tumor	68	M			ch1_site of relapse: Liver;ch1_evidence of relapse: Y;ch1_k-ras status: Wt;ch1_p53 status: Wt;ch1_egfr status: Wt	adenocarcinoma	T1	N1	M0	Stage II	Stage IIA	15.8553	1
GSM333732	GSE13213	Tumor	41	M			ch1_site of relapse: PM;ch1_evidence of relapse: Y;ch1_k-ras status: Wt;ch1_p53 status: Mut;ch1_egfr status: Mut	adenocarcinoma	T1	N0	M0	Stage I	Stage IA	38.2895	1
GSM333733	GSE13213	Tumor	55	M			ch1_site of relapse: ;ch1_evidence of relapse: N;ch1_k-ras status: Wt;ch1_p53 status: Wt;ch1_egfr status: Wt	adenocarcinoma	T1	N0	M0	Stage I	Stage IA	83.3224	0
GSM333734	GSE13213	Tumor	60	F			ch1_site of relapse: ;ch1_evidence of relapse: N;ch1_k-ras status: Wt;ch1_p53 status: Mut;ch1_egfr status: Wt	adenocarcinoma	T1	N0	M0	Stage I	Stage IA	83.1579	0
GSM333735	GSE13213	Tumor	66	M			ch1_site of relapse: ;ch1_evidence of relapse: N;ch1_k-ras status: Wt;ch1_p53 status: Wt;ch1_egfr status: Mut	adenocarcinoma	T1	N0	M0	Stage I	Stage IA	77.4013	0
GSM333736	GSE13213	Tumor	42	F			ch1_site of relapse: ;ch1_evidence of relapse: N;ch1_k-ras status: Wt;ch1_p53 status: Wt;ch1_egfr status: Wt	adenocarcinoma	T1	N0	M0	Stage I	Stage IA	82.4671	0
GSM333737	GSE13213	Tumor	56	M			ch1_site of relapse: PM?bone;ch1_evidence of relapse: Y;ch1_k-ras status: Wt;ch1_p53 status: Wt;ch1_egfr status: Mut	adenocarcinoma	T3	N0	M0	Stage II	Stage IIB	82.8618	0
GSM333738	GSE13213	Tumor	50	F			ch1_site of relapse: PM;ch1_evidence of relapse: Y;ch1_k-ras status: Wt;ch1_p53 status: Mut;ch1_egfr status: Mut	adenocarcinoma	T1	N0	M0	Stage I	Stage IA	82.9276	0
GSM333739	GSE13213	Tumor	70	F			ch1_site of relapse: Bone;ch1_evidence of relapse: Y;ch1_k-ras status: Wt;ch1_p53 status: Mut;ch1_egfr status: Mut	adenocarcinoma	T1	N2	M0	Stage III	Stage IIIA	49.375	1
GSM333740	GSE13213	Tumor	61	M			ch1_site of relapse: ;ch1_evidence of relapse: N;ch1_k-ras status: Wt;ch1_p53 status: Wt;ch1_egfr status: Wt	adenocarcinoma	T1	N0	M0	Stage I	Stage IA	74.3421	0
GSM333741	GSE13213	Tumor	63	M			ch1_site of relapse: ;ch1_evidence of relapse: N;ch1_k-ras status: Mut;ch1_p53 status: Wt;ch1_egfr status: Wt	adenocarcinoma	T2	N2	M0	Stage III	Stage IIIA	76.9408	0
GSM333742	GSE13213	Tumor	60	F			ch1_site of relapse: local rec;ch1_evidence of relapse: Y;ch1_k-ras status: Wt;ch1_p53 status: Wt;ch1_egfr status: Wt	adenocarcinoma	T2	N0	M0	Stage I	Stage IB	40.4276	1
GSM333743	GSE13213	Tumor	58	M			ch1_site of relapse: ;ch1_evidence of relapse: N;ch1_k-ras status: Mut;ch1_p53 status: Wt;ch1_egfr status: Wt	adenocarcinoma	T1	N0	M0	Stage I	Stage IA	77.0066	0
GSM333744	GSE13213	Tumor	60	M			ch1_site of relapse: Local rec.;ch1_evidence of relapse: Y;ch1_k-ras status: Wt;ch1_p53 status: Mut;ch1_egfr status: Wt	adenocarcinoma	T2	N0	M0	Stage I	Stage IB	25.5592	1
GSM333745	GSE13213	Tumor	65	F			ch1_site of relapse: Local rec.,Brain;ch1_evidence of relapse: Y;ch1_k-ras status: Wt;ch1_p53 status: Mut;ch1_egfr status: Wt	adenocarcinoma	T1	N0	M0	Stage I	Stage IA	43.8487	1
GSM333746	GSE13213	Tumor	60	F			ch1_site of relapse: ;ch1_evidence of relapse: N;ch1_k-ras status: Wt;ch1_p53 status: Mut;ch1_egfr status: Mut	adenocarcinoma	T1	N0	M0	Stage I	Stage IA	77.2368	0
GSM333747	GSE13213	Tumor	82	M			ch1_site of relapse: PM;ch1_evidence of relapse: Y;ch1_k-ras status: Wt;ch1_p53 status: Wt;ch1_egfr status: Wt	adenocarcinoma	T2	N0	M0	Stage I	Stage IB	33.1579	1
GSM333748	GSE13213	Tumor	67	M			ch1_site of relapse: Bone;ch1_evidence of relapse: Y;ch1_k-ras status: Wt;ch1_p53 status: Mut;ch1_egfr status: Wt	adenocarcinoma	T3	N0	M0	Stage II	Stage IIB	39.5066	1
GSM333749	GSE13213	Tumor	67	F			ch1_site of relapse: ;ch1_evidence of relapse: N;ch1_k-ras status: Wt;ch1_p53 status: Mut;ch1_egfr status: Mut	adenocarcinoma	T2	N0	M0	Stage I	Stage IB	64.3421	0
GSM333750	GSE13213	Tumor	60	F			ch1_site of relapse: PM;ch1_evidence of relapse: Y;ch1_k-ras status: Wt;ch1_p53 status: Wt;ch1_egfr status: Mut	adenocarcinoma	T2	N2	M0	Stage III	Stage IIIA	24.6382	1
GSM333751	GSE13213	Tumor	66	M			ch1_site of relapse: ;ch1_evidence of relapse: N;ch1_k-ras status: Wt;ch1_p53 status: Wt;ch1_egfr status: Wt	adenocarcinoma	T1	N0	M0	Stage I	Stage IA	76.8092	0
GSM333752	GSE13213	Tumor	73	M			ch1_site of relapse: Brain;ch1_evidence of relapse: Y;ch1_k-ras status: Wt;ch1_p53 status: Wt;ch1_egfr status: Mut	adenocarcinoma	T1	N1	M0	Stage II	Stage IIA	28.2895	1
GSM333753	GSE13213	Tumor	74	M			ch1_site of relapse: PM;ch1_evidence of relapse: Y;ch1_k-ras status: Mut;ch1_p53 status: Wt;ch1_egfr status: Wt	adenocarcinoma	T2	N0	M0	Stage I	Stage IB	6.11842	1
GSM333754	GSE13213	Tumor	56	M			ch1_site of relapse: ;ch1_evidence of relapse: N;ch1_k-ras status: Wt;ch1_p53 status: Wt;ch1_egfr status: Wt	adenocarcinoma	T3	N0	M0	Stage II	Stage IIB	77.0395	0
GSM333755	GSE13213	Tumor	49	F			ch1_site of relapse: Brain;ch1_evidence of relapse: Y;ch1_k-ras status: Wt;ch1_p53 status: Wt;ch1_egfr status: Mut	adenocarcinoma	T1	N2	M0	Stage III	Stage IIIA	35.3289	1
GSM333756	GSE13213	Tumor	60	F			ch1_site of relapse: PM, Liver;ch1_evidence of relapse: Y;ch1_k-ras status: Wt;ch1_p53 status: Mut;ch1_egfr status: Wt	adenocarcinoma	T2	N1	M0	Stage II	Stage IIB	28.5197	1
GSM333757	GSE13213	Tumor	53	M			ch1_site of relapse: LN (neck);ch1_evidence of relapse: Y;ch1_k-ras status: Wt;ch1_p53 status: Mut;ch1_egfr status: Wt	adenocarcinoma	T2	N2	M0	Stage III	Stage IIIA	10	1
GSM333758	GSE13213	Tumor	51	M			ch1_site of relapse: Brain;ch1_evidence of relapse: Y;ch1_k-ras status: Wt;ch1_p53 status: Wt;ch1_egfr status: Wt	adenocarcinoma	T1	N0	M0	Stage I	Stage IA	29.8026	1
GSM333759	GSE13213	Tumor	74	M			ch1_site of relapse: Local rec.;ch1_evidence of relapse: Y;ch1_k-ras status: Wt;ch1_p53 status: Wt;ch1_egfr status: Wt	adenocarcinoma	T1	N0	M0	Stage I	Stage IA	15.6908	1
GSM333760	GSE13213	Tumor	64	M			ch1_site of relapse: ;ch1_evidence of relapse: N;ch1_k-ras status: Mut;ch1_p53 status: Wt;ch1_egfr status: Wt	adenocarcinoma	T2	N0	M0	Stage I	Stage IB	75.4605	0
GSM333761	GSE13213	Tumor	49	F			ch1_site of relapse: ;ch1_evidence of relapse: N;ch1_k-ras status: Wt;ch1_p53 status: Wt;ch1_egfr status: Mut	adenocarcinoma	T1	N0	M0	Stage I	Stage IA	75.2632	0
GSM333762	GSE13213	Tumor	70	M			ch1_site of relapse: ;ch1_evidence of relapse: N;ch1_k-ras status: Wt;ch1_p53 status: Mut;ch1_egfr status: Mut	adenocarcinoma	T2	N0	M0	Stage I	Stage IB	74.6053	0
GSM333763	GSE13213	Tumor	75	M			ch1_site of relapse: ;ch1_evidence of relapse: N;ch1_k-ras status: Wt;ch1_p53 status: Mut;ch1_egfr status: Wt	adenocarcinoma	T2	N0	M0	Stage I	Stage IB	69.1118	0
GSM333764	GSE13213	Tumor	76	F			ch1_site of relapse: ;ch1_evidence of relapse: N;ch1_k-ras status: Wt;ch1_p53 status: Wt;ch1_egfr status: Wt	adenocarcinoma	T1	N0	M0	Stage I	Stage IA	72.0066	0
GSM333765	GSE13213	Tumor	53	F			ch1_site of relapse: Brain;ch1_evidence of relapse: Y;ch1_k-ras status: Wt;ch1_p53 status: Mut;ch1_egfr status: Mut	adenocarcinoma	T1	N0	M0	Stage I	Stage IA	70.5263	1
GSM333766	GSE13213	Tumor	75	M			ch1_site of relapse: Bone;ch1_evidence of relapse: Y;ch1_k-ras status: Mut;ch1_p53 status: Mut;ch1_egfr status: Wt	adenocarcinoma	T2	N0	M0	Stage I	Stage IB	63.1579	1
GSM333767	GSE13213	Tumor	60	M			ch1_site of relapse: ;ch1_evidence of relapse: N;ch1_k-ras status: Wt;ch1_p53 status: Wt;ch1_egfr status: Mut	adenocarcinoma	T1	N0	M0	Stage I	Stage IA	66.4145	0
GSM333768	GSE13213	Tumor	61	F			ch1_site of relapse: PM;ch1_evidence of relapse: Y;ch1_k-ras status: Wt;ch1_p53 status: Mut;ch1_egfr status: Mut	adenocarcinoma	T1	N0	M0	Stage I	Stage IA	39.9013	1
GSM333769	GSE13213	Tumor	67	M			ch1_site of relapse: PM;ch1_evidence of relapse: Y;ch1_k-ras status: Wt;ch1_p53 status: Wt;ch1_egfr status: Wt	adenocarcinoma	T1	N0	M0	Stage I	Stage IA	34.3421	1
GSM333770	GSE13213	Tumor	63	M			ch1_site of relapse: ;ch1_evidence of relapse: Y;ch1_k-ras status: Mut;ch1_p53 status: Wt;ch1_egfr status: Wt	adenocarcinoma	T2	N0	M0	Stage I	Stage IB	64.3092	0
GSM333771	GSE13213	Tumor	56	F			ch1_site of relapse: ;ch1_evidence of relapse: Y;ch1_k-ras status: Wt;ch1_p53 status: N/A;ch1_egfr status: Wt	adenocarcinoma	T1	N0	M0	Stage I	Stage IA	67.9934	0
GSM333772	GSE13213	Tumor	69	F			ch1_site of relapse: ;ch1_evidence of relapse: N;ch1_k-ras status: Wt;ch1_p53 status: Wt;ch1_egfr status: Wt	adenocarcinoma	T2	N0	M0	Stage I	Stage IB	66.0855	0
GSM333773	GSE13213	Tumor	68	F			ch1_site of relapse: ;ch1_evidence of relapse: N;ch1_k-ras status: Wt;ch1_p53 status: Wt;ch1_egfr status: Mut	adenocarcinoma	T1	N0	M0	Stage I	Stage IA	64.7039	0
GSM333774	GSE13213	Tumor	72	F			ch1_site of relapse: ;ch1_evidence of relapse: N;ch1_k-ras status: Wt;ch1_p53 status: Mut;ch1_egfr status: Mut	adenocarcinoma	T1	N0	M0	Stage I	Stage IA	67.1382	0
GSM333775	GSE13213	Tumor	63	F			ch1_site of relapse: PM;ch1_evidence of relapse: Y;ch1_k-ras status: Wt;ch1_p53 status: Wt;ch1_egfr status: Mut	adenocarcinoma	T1	N0	M0	Stage I	Stage IA	34.2763	1
GSM333776	GSE13213	Tumor	35	M			ch1_site of relapse: ;ch1_evidence of relapse: N;ch1_k-ras status: Wt;ch1_p53 status: Wt;ch1_egfr status: Wt	adenocarcinoma	T1	N0	M0	Stage I	Stage IA	65.5921	0
GSM333777	GSE13213	Tumor	59	F			ch1_site of relapse: ;ch1_evidence of relapse: N;ch1_k-ras status: Wt;ch1_p53 status: Mut;ch1_egfr status: Mut	adenocarcinoma	T2	N0	M0	Stage I	Stage IB	53.2237	1
GSM333778	GSE13213	Tumor	65	F			ch1_site of relapse: ;ch1_evidence of relapse: N;ch1_k-ras status: Wt;ch1_p53 status: Wt;ch1_egfr status: Mut	adenocarcinoma	T1	N0	M0	Stage I	Stage IA	60.8224	0
GSM333779	GSE13213	Tumor	47	F			ch1_site of relapse: ;ch1_evidence of relapse: N;ch1_k-ras status: Mut;ch1_p53 status: Wt;ch1_egfr status: Wt	adenocarcinoma	T2	N0	M0	Stage I	Stage IB	59.9671	0
GSM333780	GSE13213	Tumor	61	M			ch1_site of relapse: ;ch1_evidence of relapse: N;ch1_k-ras status: Wt;ch1_p53 status: Mut;ch1_egfr status: Wt	adenocarcinoma	T2	N0	M0	Stage I	Stage IB	60.3947	0
GSM333781	GSE13213	Tumor	76	F			ch1_site of relapse: ;ch1_evidence of relapse: N;ch1_k-ras status: Wt;ch1_p53 status: Wt;ch1_egfr status: Wt	adenocarcinoma	T2	N0	M0	Stage I	Stage IB	63.5197	0
GSM333782	GSE13213	Tumor	48	F			ch1_site of relapse: ;ch1_evidence of relapse: N;ch1_k-ras status: Wt;ch1_p53 status: Wt;ch1_egfr status: Mut	adenocarcinoma	T2	N0	M0	Stage I	Stage IB	60.625	0
GSM333783	GSE13213	Tumor	57	M			ch1_site of relapse: ;ch1_evidence of relapse: N;ch1_k-ras status: Wt;ch1_p53 status: Wt;ch1_egfr status: Wt	adenocarcinoma	T1	N0	M0	Stage I	Stage IA	60.9211	0
GSM333784	GSE13213	Tumor	60	F			ch1_site of relapse: PM;ch1_evidence of relapse: Y;ch1_k-ras status: Wt;ch1_p53 status: Wt;ch1_egfr status: Mut	adenocarcinoma	T1	N0	M0	Stage I	Stage IA	62.7303	0
GSM333785	GSE13213	Tumor	47	M			ch1_site of relapse: Brain;ch1_evidence of relapse: Y;ch1_k-ras status: Wt;ch1_p53 status: Mut;ch1_egfr status: Wt	adenocarcinoma	T1	N0	M0	Stage I	Stage IA	23.4539	1
GSM333786	GSE13213	Tumor	35	M			ch1_site of relapse: ;ch1_evidence of relapse: N;ch1_k-ras status: Wt;ch1_p53 status: Wt;ch1_egfr status: Wt	adenocarcinoma	T1	N0	M0	Stage I	Stage IA	61.1184	0
GSM333787	GSE13213	Tumor	49	F			ch1_site of relapse: PM;ch1_evidence of relapse: Y;ch1_k-ras status: Wt;ch1_p53 status: Mut;ch1_egfr status: Mut	adenocarcinoma	T2	N0	M0	Stage I	Stage IB	55.7895	0
GSM333788	GSE13213	Tumor	61	M			ch1_site of relapse: PM;ch1_evidence of relapse: Y;ch1_k-ras status: Wt;ch1_p53 status: Wt;ch1_egfr status: Wt	adenocarcinoma	T1	N0	M0	Stage I	Stage IA	41.1842	1
GSM333789	GSE13213	Tumor	61	M			ch1_site of relapse: Derm (skin), med LN, bone;ch1_evidence of relapse: Y;ch1_k-ras status: Mut;ch1_p53 status: Wt;ch1_egfr status: Wt	adenocarcinoma	T2	N0	M0	Stage I	Stage IB	40.1974	1
GSM370913	GSE14814	Tumor	44.9	F				adenocarcinoma				Stage II		102.24	0	102.24	0
GSM370914	GSE14814	Tumor	53.4	M				squamous_cell_carcinoma				Stage I		108.36	0	108.36	0
GSM370915	GSE14814	Tumor	64.1	M				squamous_cell_carcinoma				Stage II		15.84	1	15.84	1
GSM370916	GSE14814	Tumor	57.1	M				LCUC				Stage II		103.92	0	103.92	0
GSM370917	GSE14814	Tumor	65.7	F				adenocarcinoma				Stage I		98.76	0	98.76	0
GSM370918	GSE14814	Tumor	69.2	M				squamous_cell_carcinoma				Stage II		24.72	1	24.72	1
GSM370919	GSE14814	Tumor	64.8	M				squamous_cell_carcinoma				Stage II		8.28	1	8.28	1
GSM370920	GSE14814	Tumor	67.2	F				adenocarcinoma				Stage I		0.36	1	0.36	0
GSM370921	GSE14814	Tumor	65.5	M				adenocarcinoma				Stage II		103.2	0	103.2	0
GSM370922	GSE14814	Tumor	70.6	M				squamous_cell_carcinoma				Stage II		19.92	1	19.92	0
GSM370923	GSE14814	Tumor	48.3	M				LCUC				Stage I		104.52	0	104.52	0
GSM370924	GSE14814	Tumor	60.8	M				LCUC				Stage I		102.6	0	102.6	0
GSM370925	GSE14814	Tumor	73.3	M				squamous_cell_carcinoma				Stage II		111.48	0	111.48	0
GSM370926	GSE14814	Tumor	73	M				squamous_cell_carcinoma				Stage I		74.04	1	74.04	0
GSM370927	GSE14814	Tumor	66.6	M				squamous_cell_carcinoma				Stage I		101.76	0	101.76	0
GSM370928	GSE14814	Tumor	63.5	F				adenocarcinoma				Stage I		19.08	1	19.08	1
GSM370929	GSE14814	Tumor	72.5	M				squamous_cell_carcinoma				Stage I		36	0	36	0
GSM370930	GSE14814	Tumor	48.2	F				squamous_cell_carcinoma				Stage II		90.36	0	90.36	0
GSM370931	GSE14814	Tumor	59.4	M				adenocarcinoma				Stage I		73.08	1	73.08	0
GSM370932	GSE14814	Tumor	63.4	F				squamous_cell_carcinoma				Stage II		96.24	0	96.24	0
GSM370933	GSE14814	Tumor	63.2	M				adenocarcinoma				Stage II		2.28	1	2.28	0
GSM370934	GSE14814	Tumor	50.2	F				adenocarcinoma				Stage I		83.16	0	83.16	0
GSM370935	GSE14814	Tumor	68.8	M				adenocarcinoma				Stage II		92.52	0	92.52	0
GSM370936	GSE14814	Tumor	53	F				squamous_cell_carcinoma				Stage I		86.88	0	86.88	0
GSM370937	GSE14814	Tumor	65.4	M				squamous_cell_carcinoma				Stage I		13.08	1	13.08	1
GSM370938	GSE14814	Tumor	81.3	M				LCUC				Stage I		14.4	1	14.4	1
GSM370939	GSE14814	Tumor	75.6	F				adenocarcinoma				Stage I		10.8	1	10.8	1
GSM370940	GSE14814	Tumor	62.1	M				squamous_cell_carcinoma				Stage II		95.28	0	95.28	0
GSM370941	GSE14814	Tumor	62.7	M				adenocarcinoma				Stage II		44.88	1	44.88	1
GSM370942	GSE14814	Tumor	72.9	M				squamous_cell_carcinoma				Stage I		86.52	0	86.52	0
GSM370943	GSE14814	Tumor	61.3	M				squamous_cell_carcinoma				Stage II		89.16	0	89.16	0
GSM370944	GSE14814	Tumor	58.2	M				adenocarcinoma				Stage II		86.4	0	86.4	0
GSM370945	GSE14814	Tumor	61.6	M				squamous_cell_carcinoma				Stage I		80.76	0	80.76	0
GSM370946	GSE14814	Tumor	56.4	M				squamous_cell_carcinoma				Stage I		27.48	1	27.48	1
GSM370947	GSE14814	Tumor	48.8	M				squamous_cell_carcinoma				Stage II		80.52	0	80.52	0
GSM370948	GSE14814	Tumor	63.3	M				squamous_cell_carcinoma				Stage II		81.12	0	81.12	0
GSM370949	GSE14814	Tumor	66.2	M				squamous_cell_carcinoma				Stage II		19.68	1	19.68	1
GSM370950	GSE14814	Tumor	42.7	M				LCUC				Stage II		8.88	1	8.88	1
GSM370951	GSE14814	Tumor	38.2	F				adenocarcinoma				Stage I		70.44	0	70.44	0
GSM370952	GSE14814	Tumor	69.6	M				squamous_cell_carcinoma				Stage I		95.28	0	95.28	0
GSM370953	GSE14814	Tumor	75.8	M				squamous_cell_carcinoma				Stage I		94.56	0	94.56	0
GSM370954	GSE14814	Tumor	65.7	M				squamous_cell_carcinoma				Stage I		22.56	1	22.56	1
GSM370955	GSE14814	Tumor	66.5	M				LCUC				Stage II		14.16	1	14.16	1
GSM370956	GSE14814	Tumor	63.7	M				adenocarcinoma				Stage I		65.04	0	65.04	0
GSM370957	GSE14814	Tumor	62.8	M				squamous_cell_carcinoma				Stage I		77.28	0	77.28	0
GSM370958	GSE14814	Tumor	56.5	F				adenocarcinoma				Stage II		60.36	0	60.36	0
GSM370959	GSE14814	Tumor	73.1	M				squamous_cell_carcinoma				Stage I		61.44	0	61.44	0
GSM370960	GSE14814	Tumor	74.4	M				squamous_cell_carcinoma				Stage II		73.08	0	73.08	0
GSM370961	GSE14814	Tumor	64.1	M				squamous_cell_carcinoma				Stage II		74.88	0	74.88	0
GSM370962	GSE14814	Tumor	63.5	M				adenocarcinoma				Stage II		27.36	1	27.36	1
GSM370963	GSE14814	Tumor	54.8	M				squamous_cell_carcinoma				Stage I		85.44	0	85.44	0
GSM370964	GSE14814	Tumor	69	M				squamous_cell_carcinoma				Stage I		38.04	1	38.04	0
GSM370965	GSE14814	Tumor	64.3	M				squamous_cell_carcinoma				Stage I		70.56	0	70.56	0
GSM370966	GSE14814	Tumor	70.3	M				squamous_cell_carcinoma				Stage I		63.72	0	63.72	0
GSM370967	GSE14814	Tumor	59.5	F				LCUC				Stage II		5.16	1	5.16	1
GSM370968	GSE14814	Tumor	60.5	M				squamous_cell_carcinoma				Stage II		84.48	0	84.48	0
GSM370969	GSE14814	Tumor	67.9	M				squamous_cell_carcinoma				Stage I		9.36	1	9.36	1
GSM370970	GSE14814	Tumor	58.1	F				squamous_cell_carcinoma				Stage II		82.32	0	82.32	0
GSM370971	GSE14814	Tumor	59.1	M				squamous_cell_carcinoma				Stage II		82.44	0	82.44	0
GSM370972	GSE14814	Tumor	50.5	M				LCUC				Stage I		7.56	1	7.56	1
GSM370973	GSE14814	Tumor	45.4	M				squamous_cell_carcinoma				Stage II		78.48	0	78.48	0
GSM370974	GSE14814	Tumor	58.5	M				squamous_cell_carcinoma				Stage II		23.52	1	23.52	0
GSM370975	GSE14814	Tumor	51.2	M				squamous_cell_carcinoma				Stage I		49.08	0	49.08	0
GSM370976	GSE14814	Tumor	45.8	F				adenocarcinoma				Stage I		22.32	1	22.32	1
GSM370977	GSE14814	Tumor	60.4	F				LCUC				Stage I		26.16	1	26.16	1
GSM370978	GSE14814	Tumor	69.4	F				squamous_cell_carcinoma				Stage I		56.88	0	56.88	0
GSM370979	GSE14814	Tumor	65.8	M				adenocarcinoma				Stage II		33.84	1	33.84	1
GSM370980	GSE14814	Tumor	61.6	M				LCUC				Stage I		108.12	0	108.12	0
GSM370981	GSE14814	Tumor	55.6	M				squamous_cell_carcinoma				Stage II		29.16	1	29.16	1
GSM370982	GSE14814	Tumor	59	M				squamous_cell_carcinoma				Stage II		60	1	60	1
GSM370983	GSE14814	Tumor	62.1	M				squamous_cell_carcinoma				Stage II		110.64	0	110.64	0
GSM370984	GSE14814	Tumor	69.2	M				adenocarcinoma				Stage II		18	1	18	1
GSM370985	GSE14814	Tumor	67.4	M				adenocarcinoma				Stage I		53.52	0	53.52	0
GSM370986	GSE14814	Tumor	69.7	F				adenocarcinoma				Stage II		47.4	0	47.4	0
GSM370987	GSE14814	Tumor	66.3	F				adenocarcinoma				Stage I		42.12	0	42.12	0
GSM370988	GSE14814	Tumor	72.4	M				squamous_cell_carcinoma				Stage I		68.04	1	68.04	0
GSM370989	GSE14814	Tumor	65.3	M				squamous_cell_carcinoma				Stage II		34.32	0	34.32	0
GSM370990	GSE14814	Tumor	70.4	M				squamous_cell_carcinoma				Stage I		93.24	0	93.24	0
GSM370991	GSE14814	Tumor	57.4	M				squamous_cell_carcinoma				Stage I		98.16	0	98.16	0
GSM370992	GSE14814	Tumor	58.4	F				adenocarcinoma				Stage II		58.68	0	58.68	0
GSM370993	GSE14814	Tumor	55.8	M				squamous_cell_carcinoma				Stage II		13.2	1	13.2	1
GSM370994	GSE14814	Tumor	66.5	M				squamous_cell_carcinoma				Stage I		13.68	1	13.68	1
GSM370995	GSE14814	Tumor	75.3	M				squamous_cell_carcinoma				Stage II		20.4	1	20.4	1
GSM370996	GSE14814	Tumor	66.9	M				squamous_cell_carcinoma				Stage II		79.92	1	79.92	1
GSM370997	GSE14814	Tumor	62	F				adenocarcinoma				Stage II		57.12	1	57.12	1
GSM370998	GSE14814	Tumor	57	F				squamous_cell_carcinoma				Stage II		68.16	0	68.16	0
GSM370999	GSE14814	Tumor	41	F				adenocarcinoma				Stage I		80.88	0	80.88	0
GSM371000	GSE14814	Tumor	63.2	M				adenocarcinoma				Stage I		64.56	0	64.56	0
GSM371001	GSE14814	Tumor	57.4	F				adenocarcinoma				Stage II		24.48	1	24.48	1
GSM371002	GSE14814	Tumor	56.8	M				adenocarcinoma				Stage I		72.36	1	72.36	0
GSM466947	GSE18842	Tumor						adenocarcinoma
GSM466948	GSE18842	Normal						adenocarcinoma
GSM466949	GSE18842	Tumor						adenocarcinoma
GSM466950	GSE18842	Normal						adenocarcinoma
GSM466951	GSE18842	Tumor						adenocarcinoma
GSM466952	GSE18842	Tumor						adenocarcinoma
GSM466953	GSE18842	Normal						adenocarcinoma
GSM466954	GSE18842	Tumor						adenocarcinoma
GSM466955	GSE18842	Normal						adenocarcinoma
GSM466956	GSE18842	Tumor						adenocarcinoma
GSM466957	GSE18842	Normal						adenocarcinoma
GSM466958	GSE18842	Tumor						adenocarcinoma
GSM466959	GSE18842	Normal						adenocarcinoma
GSM466960	GSE18842	Tumor						adenocarcinoma
GSM466961	GSE18842	Normal						adenocarcinoma
GSM466962	GSE18842	Tumor						adenocarcinoma
GSM466963	GSE18842	Tumor						adenocarcinoma
GSM466964	GSE18842	Normal						adenocarcinoma
GSM466965	GSE18842	Tumor						adenocarcinoma
GSM466966	GSE18842	Normal						adenocarcinoma
GSM466967	GSE18842	Tumor						adenocarcinoma
GSM466968	GSE18842	Normal						adenocarcinoma
GSM466969	GSE18842	Tumor						adenocarcinoma
GSM466970	GSE18842	Normal						adenocarcinoma
GSM466971	GSE18842	Tumor						adenocarcinoma
GSM466972	GSE18842	Normal						adenocarcinoma
GSM466973	GSE18842	Tumor						adenocarcinoma
GSM466974	GSE18842	Normal						adenocarcinoma
GSM466975	GSE18842	Tumor						adenocarcinoma
GSM466976	GSE18842	Normal						adenocarcinoma
GSM466977	GSE18842	Tumor						adenocarcinoma
GSM466978	GSE18842	Normal						adenocarcinoma
GSM466979	GSE18842	Normal						adenocarcinoma
GSM466980	GSE18842	Tumor						adenocarcinoma
GSM466981	GSE18842	Normal						adenocarcinoma
GSM466982	GSE18842	Tumor						adenocarcinoma
GSM466983	GSE18842	Tumor						adenocarcinoma
GSM466984	GSE18842	Normal						adenocarcinoma
GSM466985	GSE18842	Tumor						adenocarcinoma
GSM466986	GSE18842	Normal						adenocarcinoma
GSM466987	GSE18842	Tumor						adenocarcinoma
GSM466988	GSE18842	Normal						adenocarcinoma
GSM466989	GSE18842	Tumor						adenocarcinoma
GSM466990	GSE18842	Normal						adenocarcinoma
GSM466991	GSE18842	Tumor						adenocarcinoma
GSM466992	GSE18842	Normal						adenocarcinoma
GSM466993	GSE18842	Tumor						adenocarcinoma
GSM466994	GSE18842	Tumor						adenocarcinoma
GSM466995	GSE18842	Normal						adenocarcinoma
GSM466996	GSE18842	Tumor						adenocarcinoma
GSM466997	GSE18842	Normal						adenocarcinoma
GSM466998	GSE18842	Tumor						adenocarcinoma
GSM466999	GSE18842	Normal						adenocarcinoma
GSM467000	GSE18842	Normal						adenocarcinoma
GSM467001	GSE18842	Normal						adenocarcinoma
GSM467002	GSE18842	Normal						adenocarcinoma
GSM467003	GSE18842	Normal						adenocarcinoma
GSM467004	GSE18842	Tumor						adenocarcinoma
GSM467005	GSE18842	Normal						adenocarcinoma
GSM467006	GSE18842	Tumor						adenocarcinoma
GSM467007	GSE18842	Normal						adenocarcinoma
GSM467008	GSE18842	Tumor						adenocarcinoma
GSM467009	GSE18842	Normal						adenocarcinoma
GSM467010	GSE18842	Tumor						adenocarcinoma
GSM467011	GSE18842	Normal						adenocarcinoma
GSM467012	GSE18842	Tumor						adenocarcinoma
GSM467013	GSE18842	Normal						adenocarcinoma
GSM467014	GSE18842	Tumor						adenocarcinoma
GSM467015	GSE18842	Normal						adenocarcinoma
GSM467016	GSE18842	Tumor						adenocarcinoma
GSM467017	GSE18842	Normal						adenocarcinoma
GSM467018	GSE18842	Tumor						adenocarcinoma
GSM467019	GSE18842	Normal						adenocarcinoma
GSM467020	GSE18842	Normal						adenocarcinoma
GSM467021	GSE18842	Tumor						adenocarcinoma
GSM467022	GSE18842	Normal						adenocarcinoma
GSM467023	GSE18842	Tumor						adenocarcinoma
GSM467024	GSE18842	Tumor						adenocarcinoma
GSM467025	GSE18842	Normal						adenocarcinoma
GSM467026	GSE18842	Tumor						adenocarcinoma
GSM467027	GSE18842	Normal						adenocarcinoma
GSM467028	GSE18842	Tumor						adenocarcinoma
GSM467029	GSE18842	Tumor						adenocarcinoma
GSM467030	GSE18842	Tumor						adenocarcinoma
GSM467031	GSE18842	Normal						adenocarcinoma
GSM467032	GSE18842	Tumor						adenocarcinoma
GSM467033	GSE18842	Normal						adenocarcinoma
GSM467034	GSE18842	Tumor						adenocarcinoma
GSM467035	GSE18842	Normal						adenocarcinoma
GSM467036	GSE18842	Tumor						adenocarcinoma
GSM467037	GSE18842	Normal						adenocarcinoma
GSM475656	GSE19188	Tumor		M				LCC						12.5	1
GSM475657	GSE19188	Normal						healthy
GSM475658	GSE19188	Normal						healthy
GSM475659	GSE19188	Normal						healthy
GSM475660	GSE19188	Normal						healthy
GSM475661	GSE19188	Tumor						LCC
GSM475662	GSE19188	Tumor						adenocarcinoma
GSM475663	GSE19188	Normal						healthy
GSM475664	GSE19188	Tumor						squamous_cell_carcinoma
GSM475665	GSE19188	Normal						healthy
GSM475666	GSE19188	Normal						healthy
GSM475667	GSE19188	Normal						healthy
GSM475668	GSE19188	Tumor						squamous_cell_carcinoma
GSM475669	GSE19188	Normal						healthy
GSM475670	GSE19188	Tumor						adenocarcinoma
GSM475671	GSE19188	Normal						healthy
GSM475672	GSE19188	Tumor						adenocarcinoma
GSM475673	GSE19188	Normal						healthy
GSM475674	GSE19188	Tumor						squamous_cell_carcinoma
GSM475675	GSE19188	Normal						healthy
GSM475676	GSE19188	Tumor						adenocarcinoma
GSM475677	GSE19188	Tumor						adenocarcinoma
GSM475678	GSE19188	Normal		M				healthy
GSM475679	GSE19188	Tumor		F				adenocarcinoma						127	0
GSM475680	GSE19188	Normal		F				healthy
GSM475681	GSE19188	Tumor		F				adenocarcinoma						12.57	1
GSM475682	GSE19188	Normal		M				healthy
GSM475683	GSE19188	Tumor		M				adenocarcinoma						0.67	1
GSM475684	GSE19188	Normal		F				healthy
GSM475685	GSE19188	Tumor		F				adenocarcinoma						98.93	0
GSM475686	GSE19188	Normal		M				healthy
GSM475687	GSE19188	Tumor		F				adenocarcinoma						87.7	1
GSM475688	GSE19188	Normal		M				healthy
GSM475689	GSE19188	Tumor		M				adenocarcinoma						10.33	1
GSM475690	GSE19188	Normal		M				healthy
GSM475691	GSE19188	Tumor		M				adenocarcinoma						4.87	1
GSM475692	GSE19188	Tumor		M				adenocarcinoma						20.37	1
GSM475693	GSE19188	Normal		M				healthy
GSM475694	GSE19188	Tumor		M				squamous_cell_carcinoma						37.63	1
GSM475695	GSE19188	Normal		M				healthy
GSM475696	GSE19188	Tumor		M				adenocarcinoma						66.47	1
GSM475697	GSE19188	Normal		M				healthy
GSM475698	GSE19188	Tumor		M				adenocarcinoma						110.8	0
GSM475699	GSE19188	Normal		F				healthy
GSM475700	GSE19188	Tumor		F				adenocarcinoma						22.57	1
GSM475701	GSE19188	Tumor		F				adenocarcinoma						103.7	0
GSM475702	GSE19188	Normal		M				healthy
GSM475703	GSE19188	Tumor		M				adenocarcinoma						124.83	0
GSM475704	GSE19188	Normal		M				healthy
GSM475705	GSE19188	Normal		M				healthy
GSM475706	GSE19188	Tumor		M				adenocarcinoma						21.3	1
GSM475707	GSE19188	Normal		M				healthy
GSM475708	GSE19188	Tumor		M				adenocarcinoma						0.87	1
GSM475709	GSE19188	Tumor		M				adenocarcinoma						8.27	1
GSM475710	GSE19188	Tumor		M				adenocarcinoma						116.83	0
GSM475711	GSE19188	Normal		M				healthy
GSM475712	GSE19188	Tumor		M				adenocarcinoma						17.3	1
GSM475713	GSE19188	Tumor		F				squamous_cell_carcinoma						127.17	0
GSM475714	GSE19188	Normal		M				healthy
GSM475715	GSE19188	Tumor		M				adenocarcinoma						79.87	1
GSM475716	GSE19188	Normal		M				healthy
GSM475717	GSE19188	Tumor		M				LCC						79.27	1
GSM475718	GSE19188	Normal		M				healthy
GSM475719	GSE19188	Tumor		M				squamous_cell_carcinoma						10.03	1
GSM475720	GSE19188	Tumor		M				LCC						5.5	1
GSM475721	GSE19188	Normal		F				healthy
GSM475722	GSE19188	Tumor		F				LCC						17.67	1
GSM475723	GSE19188	Normal		F				healthy
GSM475724	GSE19188	Tumor		F				LCC						51.9	0
GSM475725	GSE19188	Normal		F				healthy
GSM475726	GSE19188	Normal		M				healthy
GSM475727	GSE19188	Tumor		M				LCC						56.5	1
GSM475728	GSE19188	Tumor		M				squamous_cell_carcinoma						15.07	1
GSM475729	GSE19188	Normal		M				healthy
GSM475730	GSE19188	Tumor		M				squamous_cell_carcinoma						2.43	1
GSM475731	GSE19188	Tumor		M				squamous_cell_carcinoma						86.27	1
GSM475732	GSE19188	Normal		M				healthy
GSM475733	GSE19188	Tumor		M				squamous_cell_carcinoma						51.23	0
GSM475734	GSE19188	Normal		M				healthy
GSM475735	GSE19188	Tumor		F				squamous_cell_carcinoma						27.17	1
GSM475736	GSE19188	Normal		M				healthy
GSM475737	GSE19188	Tumor		M				LCC						6.77	1
GSM475738	GSE19188	Normal		M				healthy
GSM475739	GSE19188	Tumor		M				LCC						2.67	0
GSM475740	GSE19188	Normal		M				healthy
GSM475741	GSE19188	Tumor		M				LCC						47.23	0
GSM475742	GSE19188	Normal		M				healthy
GSM475743	GSE19188	Normal		M				healthy
GSM475744	GSE19188	Tumor		M				squamous_cell_carcinoma						32.77	0
GSM475745	GSE19188	Normal		M				healthy
GSM475746	GSE19188	Normal		M				healthy
GSM475747	GSE19188	Tumor		M				adenocarcinoma						16.7	1
GSM475748	GSE19188	Tumor		M				squamous_cell_carcinoma						110	0
GSM475749	GSE19188	Normal		M				healthy
GSM475750	GSE19188	Normal		M				healthy
GSM475751	GSE19188	Tumor		M				squamous_cell_carcinoma						0.07	1
GSM475752	GSE19188	Normal		M				healthy
GSM475753	GSE19188	Tumor		M				squamous_cell_carcinoma						108.3	0
GSM475754	GSE19188	Normal		M				healthy
GSM475755	GSE19188	Normal		M				healthy
GSM475756	GSE19188	Tumor		M				squamous_cell_carcinoma						31.47	1
GSM475757	GSE19188	Normal		M				healthy
GSM475758	GSE19188	Tumor		M				squamous_cell_carcinoma						11.43	1
GSM475759	GSE19188	Tumor		M				squamous_cell_carcinoma						55.07	0
GSM475760	GSE19188	Tumor		M				squamous_cell_carcinoma						63.03	1
GSM475761	GSE19188	Tumor		F				adenocarcinoma						24.17	1
GSM475762	GSE19188	Tumor		M				squamous_cell_carcinoma						32.07	1
GSM475763	GSE19188	Tumor		M				squamous_cell_carcinoma						3.17	1
GSM475764	GSE19188	Normal		F				healthy
GSM475765	GSE19188	Tumor		F				adenocarcinoma						46.7	1
GSM475766	GSE19188	Normal		M				healthy
GSM475767	GSE19188	Normal		M				healthy
GSM475768	GSE19188	Tumor		F				adenocarcinoma						2.53	1
GSM475769	GSE19188	Tumor		F				LCC						26.43	1
GSM475770	GSE19188	Tumor		F				adenocarcinoma						63.87	0
GSM475771	GSE19188	Normal		F				healthy
GSM475772	GSE19188	Tumor		M				adenocarcinoma						27.97	0
GSM475773	GSE19188	Tumor		F				adenocarcinoma						89.73	0
GSM475774	GSE19188	Tumor		F				LCC						29.27	0
GSM475775	GSE19188	Normal		F				healthy
GSM475776	GSE19188	Tumor		F				LCC						35.73	0
GSM475777	GSE19188	Tumor		M				LCC						9.23	1
GSM475778	GSE19188	Tumor		M				squamous_cell_carcinoma						98.5	1
GSM475779	GSE19188	Tumor		M				adenocarcinoma						110.8	0
GSM475780	GSE19188	Tumor		F				adenocarcinoma						20.53	1
GSM475781	GSE19188	Normal		M				healthy
GSM475782	GSE19188	Tumor		M				squamous_cell_carcinoma						3.97	1
GSM475783	GSE19188	Normal		M				healthy
GSM475784	GSE19188	Tumor		M				adenocarcinoma						67.87	0
GSM475785	GSE19188	Tumor		M				LCC						50.53	0
GSM475786	GSE19188	Normal		F				healthy
GSM475787	GSE19188	Tumor		F				adenocarcinoma						20.93	0
GSM475788	GSE19188	Tumor		M				adenocarcinoma						23.13	0
GSM475789	GSE19188	Tumor		M				squamous_cell_carcinoma						97.73	0
GSM475790	GSE19188	Normal		M				healthy
GSM475791	GSE19188	Tumor		M				LCC						67.63	0
GSM475792	GSE19188	Tumor		M				adenocarcinoma						20.37	1
GSM475793	GSE19188	Tumor		M				LCC						78.9	0
GSM475794	GSE19188	Tumor		M				adenocarcinoma						5.53	1
GSM475795	GSE19188	Tumor		M				adenocarcinoma						13.73	1
GSM475796	GSE19188	Tumor		M				adenocarcinoma						124.3	0
GSM475797	GSE19188	Tumor		F				adenocarcinoma						89.03	0
GSM475798	GSE19188	Normal		F				healthy
GSM475799	GSE19188	Tumor		F				adenocarcinoma						78.63	0
GSM475800	GSE19188	Normal		M				healthy
GSM475801	GSE19188	Tumor		M				squamous_cell_carcinoma						1.13	1
GSM475802	GSE19188	Tumor		M				LCC						9.47	1
GSM475803	GSE19188	Tumor		M				adenocarcinoma						60.73	1
GSM475804	GSE19188	Tumor		M				squamous_cell_carcinoma						19.17	1
GSM475805	GSE19188	Tumor		F				LCC						94.57	0
GSM475806	GSE19188	Tumor		M				squamous_cell_carcinoma						80.03	1
GSM475807	GSE19188	Normal		M				healthy
GSM475808	GSE19188	Tumor		M				adenocarcinoma						2.5	1
GSM475809	GSE19188	Normal		M				healthy
GSM475810	GSE19188	Tumor		M				adenocarcinoma						7.13	1
GSM475811	GSE19188	Normal						healthy
GSM673870	GSE27262	Normal						adenocarcinoma				Stage I	Stage IB
GSM673871	GSE27262	Tumor						adenocarcinoma				Stage I	Stage IB
GSM673872	GSE27262	Normal						adenocarcinoma				Stage I	Stage IB
GSM673873	GSE27262	Tumor						adenocarcinoma				Stage I	Stage IB
GSM673874	GSE27262	Normal						adenocarcinoma				Stage I	Stage IA
GSM673875	GSE27262	Tumor						adenocarcinoma				Stage I	Stage IA
GSM673876	GSE27262	Normal						adenocarcinoma				Stage I	Stage IA
GSM673877	GSE27262	Tumor						adenocarcinoma				Stage I	Stage IA
GSM673878	GSE27262	Normal						adenocarcinoma				Stage I	Stage IA
GSM673879	GSE27262	Tumor						adenocarcinoma				Stage I	Stage IA
GSM673880	GSE27262	Normal						adenocarcinoma				Stage I	Stage IB
GSM673881	GSE27262	Tumor						adenocarcinoma				Stage I	Stage IB
GSM673882	GSE27262	Normal						adenocarcinoma				Stage I	Stage IB
GSM673883	GSE27262	Tumor						adenocarcinoma				Stage I	Stage IB
GSM673884	GSE27262	Normal						adenocarcinoma				Stage I	Stage IB
GSM673885	GSE27262	Tumor						adenocarcinoma				Stage I	Stage IB
GSM673886	GSE27262	Normal						adenocarcinoma				Stage I	Stage IB
GSM673887	GSE27262	Tumor						adenocarcinoma				Stage I	Stage IB
GSM673888	GSE27262	Normal						adenocarcinoma				Stage I	Stage IB
GSM673889	GSE27262	Tumor						adenocarcinoma				Stage I	Stage IB
GSM673890	GSE27262	Normal						adenocarcinoma				Stage I	Stage IB
GSM673891	GSE27262	Tumor						adenocarcinoma				Stage I	Stage IB
GSM673892	GSE27262	Normal						adenocarcinoma				Stage I	Stage IB
GSM673893	GSE27262	Tumor						adenocarcinoma				Stage I	Stage IB
GSM673894	GSE27262	Normal						adenocarcinoma				Stage I	Stage IA
GSM673895	GSE27262	Tumor						adenocarcinoma				Stage I	Stage IA
GSM673896	GSE27262	Normal						adenocarcinoma				Stage I	Stage IB
GSM673897	GSE27262	Tumor						adenocarcinoma				Stage I	Stage IB
GSM673898	GSE27262	Normal						adenocarcinoma				Stage I	Stage IB
GSM673899	GSE27262	Tumor						adenocarcinoma				Stage I	Stage IB
GSM673900	GSE27262	Normal						adenocarcinoma				Stage I	Stage IA
GSM673901	GSE27262	Tumor						adenocarcinoma				Stage I	Stage IA
GSM673902	GSE27262	Normal						adenocarcinoma				Stage I	Stage IB
GSM673903	GSE27262	Tumor						adenocarcinoma				Stage I	Stage IB
GSM673904	GSE27262	Normal						adenocarcinoma				Stage I	Stage IB
GSM673905	GSE27262	Tumor						adenocarcinoma				Stage I	Stage IB
GSM673906	GSE27262	Normal						adenocarcinoma				Stage I	Stage IB
GSM673907	GSE27262	Tumor						adenocarcinoma				Stage I	Stage IB
GSM673908	GSE27262	Normal						adenocarcinoma				Stage I	Stage IB
GSM673909	GSE27262	Tumor						adenocarcinoma				Stage I	Stage IB
GSM673910	GSE27262	Normal						adenocarcinoma				Stage I	Stage IB
GSM673911	GSE27262	Tumor						adenocarcinoma				Stage I	Stage IB
GSM673912	GSE27262	Normal						adenocarcinoma				Stage I	Stage IA
GSM673913	GSE27262	Tumor						adenocarcinoma				Stage I	Stage IA
GSM673914	GSE27262	Normal						adenocarcinoma				Stage I	Stage IA
GSM673915	GSE27262	Tumor						adenocarcinoma				Stage I	Stage IA
GSM673916	GSE27262	Normal						adenocarcinoma				Stage I	Stage IB
GSM673917	GSE27262	Tumor						adenocarcinoma				Stage I	Stage IB
GSM673918	GSE27262	Normal						adenocarcinoma				Stage I	Stage IB
GSM673919	GSE27262	Tumor						adenocarcinoma				Stage I	Stage IB
GSM718769	GSE29013	Tumor	67	M	Caucasian	Yes	time_to_progression: 2.384668036;progression: 0;adj_chemo: Yes	Squamous				Stage II	Stage IIA	28.56	0
GSM718770	GSE29013	Tumor	67	M	Caucasian	Yes	time_to_progression: 2.264202601;progression: 0;adj_chemo: Yes	adenocarcinoma				Stage I	Stage IB	27.12	0
GSM718771	GSE29013	Tumor	65	M	Caucasian	Yes	time_to_progression: 0.377823409;progression: 1;adj_chemo: Yes	Squamous				Stage III	Stage IIIB	16.8	1
GSM718772	GSE29013	Tumor	51	F	Caucasian	Yes	time_to_progression: 2.819986311;progression: 0;adj_chemo: Yes	adenocarcinoma				Stage II	Stage IIB	33.72	0
GSM718773	GSE29013	Tumor	72	M	Caucasian	Yes	time_to_progression: 2.896646133;progression: 1;adj_chemo: Yes	adenocarcinoma				Stage II	Stage IIB	34.68	0
GSM718774	GSE29013	Tumor	65	M	Caucasian	Yes	time_to_progression: 2.130047912;progression: 0;adj_chemo: Yes	adenocarcinoma				Stage I	Stage IB	25.56	0
GSM718775	GSE29013	Tumor	58	M	Caucasian	Yes	time_to_progression: 2.721423682;progression: 0;adj_chemo: Yes	adenocarcinoma				Stage I	Stage IB	32.64	0
GSM718776	GSE29013	Tumor	53	M	Caucasian	Yes	time_to_progression: 2.899383984;progression: 0;adj_chemo: Yes	Squamous				Stage II	Stage IIB	34.68	0
GSM718777	GSE29013	Tumor	70	F	Caucasian	Yes	time_to_progression: 0.785763176;progression: 1;adj_chemo: Yes	adenocarcinoma				Stage III	Stage IIIA	12.12	1
GSM718778	GSE29013	Tumor	76	M	Caucasian	Yes	time_to_progression: 3.197809719;progression: 0;adj_chemo: Yes	Squamous				Stage I	Stage IB	38.28	0
GSM718779	GSE29013	Tumor	73	M	Caucasian	Yes	time_to_progression: 1.045859001;progression: 1;adj_chemo: Yes	Squamous				Stage I	Stage IB	36.12	1
GSM718780	GSE29013	Tumor	63	F	Caucasian	Yes	time_to_progression: 0.750171116;progression: 1;adj_chemo: Yes	adenocarcinoma				Stage II	Stage IIB	31.08	0
GSM718781	GSE29013	Tumor	32	F	Caucasian	No	time_to_progression: 2.633812457;progression: 1;adj_chemo: Yes	adenocarcinoma				Stage II	Stage IIA	42.36	1
GSM718782	GSE29013	Tumor	54	F	African American	Yes	time_to_progression: 0.815879535;progression: 1;adj_chemo: Yes	Squamous				Stage I	Stage IB	15.48	1
GSM718783	GSE29013	Tumor	74	F	Caucasian	No	time_to_progression: 3.258042437;progression: 0;adj_chemo: Yes	adenocarcinoma				Stage I	Stage IB	39	0
GSM718784	GSE29013	Tumor	59	F	Caucasian	Yes	time_to_progression: 2.948665298;progression: 0;adj_chemo: Yes	adenocarcinoma				Stage I	Stage IB	35.28	0
GSM718785	GSE29013	Tumor	76	F	Caucasian	Yes	time_to_progression: 3.351129363;progression: 1;adj_chemo: Yes	adenocarcinoma				Stage I	Stage IB	40.2	1
GSM718786	GSE29013	Tumor	63	F	Caucasian	Yes	time_to_progression: 2.970568104;progression: 0;adj_chemo: Yes	Squamous				Stage I	Stage IB	35.64	0
GSM718787	GSE29013	Tumor	60	M	Caucasian	Yes	time_to_progression: 2.658453114;progression: 0;adj_chemo: Yes	Squamous				Stage III	Stage IIIA	31.8	0
GSM718788	GSE29013	Tumor	60	F	Caucasian	Yes	time_to_progression: 2.195756331;progression: 0;adj_chemo: Yes	adenocarcinoma				Stage I	Stage IB	26.28	0
GSM718789	GSE29013	Tumor	75	M	Caucasian	Yes	time_to_progression: 3.72347707;progression: 0;adj_chemo: Yes	adenocarcinoma				Stage I	Stage IB	49.68	0
GSM718790	GSE29013	Tumor	49	M	Caucasian	Yes	time_to_progression: 3.392197125;progression: 0;adj_chemo: Yes	adenocarcinoma				Stage III	Stage IIIB	40.68	0
GSM718791	GSE29013	Tumor	65	M	Caucasian	Yes	time_to_progression: 3.383983573;progression: 0;adj_chemo: Yes	adenocarcinoma				Stage III	Stage IIIA	40.56	0
GSM718792	GSE29013	Tumor	49	M	Caucasian	Yes	time_to_progression: 0.41615332;progression: 1;adj_chemo: Yes	Squamous				Stage III	Stage IIIA	6.24	1
GSM718793	GSE29013	Tumor	62	F	Caucasian	Yes	time_to_progression: 0.596851472;progression: 1;adj_chemo: Yes	adenocarcinoma				Stage II	Stage IIB	32.88	1
GSM718794	GSE29013	Tumor	60	M	Caucasian	Yes	time_to_progression: 3.75633128;progression: 1;adj_chemo: Yes	Squamous				Stage I	Stage IB	49.8	0
GSM718795	GSE29013	Tumor	55	F	Caucasian	Yes	time_to_progression: 1.084188912;progression: 1;adj_chemo: Yes	Squamous				Stage III	Stage IIIB	20.76	1
GSM718796	GSE29013	Tumor	65	M	Caucasian	Yes	time_to_progression: 0.657084189;progression: 1;adj_chemo: Yes	Squamous				Stage II	Stage IIB	16.56	1
GSM718797	GSE29013	Tumor	72	M	Caucasian	Yes	time_to_progression: 4.17522245;progression: 0;adj_chemo: Yes	adenocarcinoma				Stage III	Stage IIIB	50.04	0
GSM718798	GSE29013	Tumor	75	M	Caucasian	Yes	time_to_progression: 0.73100616;progression: 1;adj_chemo: Yes	Squamous				Stage III	Stage IIIA	15.84	1
GSM718799	GSE29013	Tumor	67	F	Caucasian	Yes	time_to_progression: 1.785078713;progression: 1;adj_chemo: Yes	Squamous				Stage I	Stage IA	21.36	0
GSM718800	GSE29013	Tumor	61	M	Caucasian	Yes	time_to_progression: 2.020533881;progression: 0;adj_chemo: Yes	adenocarcinoma				Stage III	Stage IIIA	24.24	0
GSM718801	GSE29013	Tumor	75	M	Caucasian	Yes	time_to_progression: 2.617385352;progression: 1;adj_chemo: Yes	adenocarcinoma				Stage I	Stage IB	32.4	0
GSM718802	GSE29013	Tumor	50	M	Caucasian	Yes	time_to_progression: 1.861738535;progression: 1;adj_chemo: Yes	Squamous				Stage III	Stage IIIB	16.8	1
GSM718803	GSE29013	Tumor	70	M	Caucasian	Yes	time_to_progression: 0.465434634;progression: 0;adj_chemo: No	adenocarcinoma				Stage III	Stage IIIB	5.52	0
GSM718804	GSE29013	Tumor	69	M	Caucasian	Yes	time_to_progression: 0.618754278;progression: 1;adj_chemo: No	adenocarcinoma				Stage I	Stage IB	7.68	0
GSM718805	GSE29013	Tumor	70	M	Caucasian	Yes	time_to_progression: 0.856947296;progression: 1;adj_chemo: No	adenocarcinoma				Stage I	Stage IB	11.28	0
GSM718806	GSE29013	Tumor	65	M	Caucasian	Yes	time_to_progression: 2.46954141;progression: 0;adj_chemo: No	Squamous				Stage II	Stage IIB	29.52	0
GSM718807	GSE29013	Tumor	67	F	Caucasian	Yes	time_to_progression: 2.203969884;progression: 0;adj_chemo: No	Squamous				Stage III	Stage IIIB	26.4	0
GSM718808	GSE29013	Tumor	71	F	Caucasian	Yes	time_to_progression: 2.973305955;progression: 0;adj_chemo: No	adenocarcinoma				Stage I	Stage IB	35.64	0
GSM718809	GSE29013	Tumor	64	M	Caucasian	Yes	time_to_progression: 3.868583162;progression: 0;adj_chemo: No	adenocarcinoma				Stage I	Stage IA	46.32	0
GSM718810	GSE29013	Tumor	50	M	Caucasian	Yes	time_to_progression: 1.308692676;progression: 1;adj_chemo: No	adenocarcinoma				Stage III	Stage IIIA	26.04	1
GSM718811	GSE29013	Tumor	63	F	Caucasian	Yes	time_to_progression: 3.014373717;progression: 1;adj_chemo: No	Squamous				Stage II	Stage IIA	42.96	0
GSM718812	GSE29013	Tumor	57	M	Caucasian	Yes	time_to_progression: 1.032169747;progression: 1;adj_chemo: No	adenocarcinoma				Stage I	Stage IB	25.92	1
GSM718813	GSE29013	Tumor	54	M	Caucasian	Yes	time_to_progression: 4.213552361;progression: 1;adj_chemo: No	adenocarcinoma				Stage III	Stage IIIB	57.96	0
GSM718814	GSE29013	Tumor	72	M	Caucasian	Yes	time_to_progression: 4.717316906;progression: 0;adj_chemo: No	Squamous				Stage I	Stage IB	56.52	0
GSM718815	GSE29013	Tumor	69	M	Caucasian	Yes	time_to_progression: 4.777549624;progression: 0;adj_chemo: No	Squamous				Stage I	Stage IB	57.24	0
GSM718816	GSE29013	Tumor	53	M	Caucasian	Yes	time_to_progression: 5.278576318;progression: 0;adj_chemo: No	Squamous				Stage II	Stage IIB	63.24	0
GSM718817	GSE29013	Tumor	68	M	Caucasian	Yes	time_to_progression: 1.505817933;progression: 1;adj_chemo: No	adenocarcinoma				Stage II	Stage IIB	28.8	1
GSM718818	GSE29013	Tumor	67	M	Caucasian	Yes	time_to_progression: 5.352498289;progression: 0;adj_chemo: No	Squamous				Stage II	Stage IIB	64.2	0
GSM718819	GSE29013	Tumor	65	M	Caucasian	Yes	time_to_progression: 0.602327173;progression: 1;adj_chemo: No	Squamous				Stage III	Stage IIIB	33.24	1
GSM718820	GSE29013	Tumor	59	F	Caucasian	Yes	time_to_progression: 6.869267625;progression: 0;adj_chemo: No	Squamous				Stage II	Stage IIB	82.32	0
GSM718821	GSE29013	Tumor	68	M	African American	Yes	time_to_progression: 0.240930869;progression: 1;adj_chemo: No	Squamous				Stage III	Stage IIIB	2.88	1
GSM718822	GSE29013	Tumor	69	M	Caucasian	Yes	time_to_progression: 3.589322382;progression: 1;adj_chemo: No	adenocarcinoma				Stage I	Stage IB	42.96	1
GSM718823	GSE29013	Tumor	69	M	Caucasian	Yes	time_to_progression: 3.140314853;progression: 1;adj_chemo: No	adenocarcinoma				Stage I	Stage IA	69.6	0
GSM1465989	GSE30219	Tumor	60	F				adenocarcinoma	T1	N0	M0			221	0	221	0
GSM1465990	GSE30219	Tumor	52	M				LCNE	T3	N2	M0			11	1
GSM1465991	GSE30219	Tumor	66	M				LCNE	T2	N0	M0			57	1	57	0
GSM1465992	GSE30219	Tumor	70	F				CARCI	T4	N3	M0			43	1	43	1
GSM1465993	GSE30219	Tumor	82	M				SQC	T2	N0	M0			95	1	14	1
GSM1465994	GSE30219	Tumor	63	M				SQC	T2	N1	M0			34	1	11	1
GSM1465995	GSE30219	Tumor	76	M				LCNE	T2	N1	MX			12	0	12	0
GSM1465996	GSE30219	Tumor	75	M				LCNE	T2	N0	MX			33	1	33	0
GSM1465997	GSE30219	Tumor	65	M				LCNE	T2	N0	MX			24	0	24	0
GSM1465998	GSE30219	Tumor	48	M				SQC	T1	N0	M0			200	0	200	0
GSM1465999	GSE30219	Tumor	72	M				BAS	T2	N0	M0			80	1	73	1
GSM748053	GSE30219	Tumor	62	F				adenocarcinoma	T1	N0	M0			121	0	121	0
GSM748054	GSE30219	Tumor	50	M				adenocarcinoma	T1	N0	M0			21	1	21	0
GSM748055	GSE30219	Tumor	62	F				adenocarcinoma	T1	N0	M0			86	1	86	0
GSM748056	GSE30219	Tumor	71	M				SQC	T1	N0	M0			12	1	10	1
GSM748057	GSE30219	Tumor	62	M				adenocarcinoma	T1	N0	M0			195	1	81	1
GSM748058	GSE30219	Tumor	53	F				adenocarcinoma	T1	N0	M0			68	0	68	0
GSM748059	GSE30219	Tumor	67	M				SQC	T1	N0	M0			52	1	52	0
GSM748060	GSE30219	Normal
GSM748061	GSE30219	Tumor	63	M				SQC	T1	N0	M0			70	1	70	0
GSM748062	GSE30219	Tumor	78	M				SQC	T1	N0	M0			115	0	115	0
GSM748063	GSE30219	Tumor	71	M				SQC	T1	N0	M0			72	1	13	1
GSM748064	GSE30219	Tumor	44	F				adenocarcinoma	T1	N0	M0			118	0	118	0
GSM748065	GSE30219	Tumor	51	M				SQC	T1	N0	M0			104	1	104	1
GSM748066	GSE30219	Tumor	51	M				SQC	T1	N0	M0			5	1	5	0
GSM748067	GSE30219	Tumor	58	M				SQC	T1	N0	M0			218	0	218	0
GSM748068	GSE30219	Tumor	52	M				adenocarcinoma	T1	N0	M0			87	0	87	0
GSM748069	GSE30219	Tumor	62	M				LCC	T1	N0	M0			85	0	5	1
GSM748070	GSE30219	Normal
GSM748071	GSE30219	Tumor	60	M				adenocarcinoma	T1	N0	M0			51	0	51	0
GSM748072	GSE30219	Tumor	70	M				SQC	T1	N0	M0			134	0	134	0
GSM748073	GSE30219	Tumor	72	M				Other	T1	N0	M0			36	1	36	0
GSM748074	GSE30219	Tumor	65	M				SQC	T1	N0	M0			54	0	54	0
GSM748075	GSE30219	Tumor	65	M				adenocarcinoma	T1	N0	M0			34	1	28	1
GSM748076	GSE30219	Tumor	67	M				SQC	T1	N0	M0			228	1	228	0
GSM748077	GSE30219	Tumor	80	M				adenocarcinoma	T1	N0	M0			20	1	18	1
GSM748078	GSE30219	Tumor	77	M				adenocarcinoma	T1	N0	M0			58	0	58	0
GSM748079	GSE30219	Tumor	65	M				adenocarcinoma	T1	N0	M0			29	1	28	1
GSM748080	GSE30219	Tumor	60	M				adenocarcinoma	T1	N0	M0			64	0	64	0
GSM748081	GSE30219	Tumor	58	M				adenocarcinoma	T1	N0	M0			102	0	6	1
GSM748083	GSE30219	Tumor	53	M				adenocarcinoma	T1	N0	M0			8	1	8	0
GSM748084	GSE30219	Tumor	74	M				SQC	T1	N0	M0			71	1	68	1
GSM748085	GSE30219	Tumor	78	M				adenocarcinoma	T1	N0	M0			89	1	88	1
GSM748086	GSE30219	Tumor	71	M				adenocarcinoma	T1	N0	M0			131	0	131	0
GSM748087	GSE30219	Tumor	60	M				adenocarcinoma	T1	N0	M0			101	0	101	0
GSM748088	GSE30219	Tumor	52	M				SQC	T1	N0	M0			170	0	170	0
GSM748089	GSE30219	Tumor	48	M				adenocarcinoma	T1	N0	M0			25	1	3	1
GSM748090	GSE30219	Tumor	56	M				adenocarcinoma	T1	N0	M0			88	0	88	0
GSM748091	GSE30219	Tumor	49	M				adenocarcinoma	T1	N0	M0			84	0	84	0
GSM748092	GSE30219	Tumor	53	F				adenocarcinoma	T1	N0	M0			116	0	116	0
GSM748093	GSE30219	Tumor	62	M				SQC	T1	N0	M0			44	1	44	0
GSM748094	GSE30219	Tumor	59	M				adenocarcinoma	T1	N0	M0			108	1	108	0
GSM748095	GSE30219	Tumor	56	M				SQC	T1	N0	M0			55	0	55	0
GSM748096	GSE30219	Tumor	78	M				Other	T1	N0	M0			2	1	2	0
GSM748097	GSE30219	Tumor	74	F				SQC	T1	N0	M0			55	0	55	0
GSM748098	GSE30219	Tumor	60	M				SQC	T1	N0	M0			111	1	111	0
GSM748099	GSE30219	Tumor	70	F				SQC	T1	N0	M0			76	1	76	0
GSM748100	GSE30219	Tumor	62	M				adenocarcinoma	T1	N0	M0			46	1	46	0
GSM748101	GSE30219	Tumor	70	F				adenocarcinoma	T1	N0	M0			175	1	175	0
GSM748102	GSE30219	Tumor	64	M				adenocarcinoma	T1	N0	M0			203	0	203	0
GSM748103	GSE30219	Tumor	84	F				adenocarcinoma	T1	N0	M0			59	0	59	0
GSM748104	GSE30219	Tumor	72	F				adenocarcinoma	T1	N0	M0			74	1	54	1
GSM748105	GSE30219	Tumor	75	M				SQC	T1	N0	M0			124	1	124	0
GSM748106	GSE30219	Tumor	52	M				SQC	T1	N0	M0			199	0	199	0
GSM748107	GSE30219	Normal
GSM748108	GSE30219	Tumor	63	F				adenocarcinoma	T1	N0	M0			62	0	62	0
GSM748109	GSE30219	Tumor	57	M				SQC	T1	N0	M0			139	1	40	1
GSM748110	GSE30219	Tumor	69	M				SQC	T1	N0	M0			52	0	52	0
GSM748111	GSE30219	Tumor	60	M				adenocarcinoma	T1	N0	M0			25	1	25	0
GSM748112	GSE30219	Tumor	54	M				SQC	T1	N0	M0			31	1	16	1
GSM748113	GSE30219	Tumor	55	M				adenocarcinoma	T1	N0	M0			90	1	50	1
GSM748115	GSE30219	Tumor	74	M				SQC	T1	N0	M0			17	1	17	0
GSM748116	GSE30219	Tumor	77	M				adenocarcinoma	T1	N0	M0			40	1	18	1
GSM748117	GSE30219	Tumor	69	M				SQC	T1	N0	M0			11	1	11	1
GSM748118	GSE30219	Normal
GSM748119	GSE30219	Tumor	53	M				SQC	T1	N0	M0			220	0	220	0
GSM748120	GSE30219	Tumor	67	M				SQC	T1	N0	M0			45	1	45	0
GSM748121	GSE30219	Tumor	47	F				adenocarcinoma	T1	N0	M0			85	0	85	0
GSM748122	GSE30219	Tumor	66	M				adenocarcinoma	T1	N0	M0			113	0	113	0
GSM748123	GSE30219	Tumor	59	M				adenocarcinoma	T1	N0	M0			12	1	12	1
GSM748124	GSE30219	Tumor	57	M				adenocarcinoma	T1	N0	M0			81	0	81	0
GSM748125	GSE30219	Tumor	65	M				adenocarcinoma	T1	N0	M0			56	0	56	0
GSM748126	GSE30219	Tumor	49	M				adenocarcinoma	T1	N0	M0			69	0	69	0
GSM748127	GSE30219	Tumor	69	M				adenocarcinoma	T1	N0	M0			52	1	52	0
GSM748128	GSE30219	Tumor	53	M				adenocarcinoma	T1	N0	M0			72	0	72	0
GSM748129	GSE30219	Normal
GSM748130	GSE30219	Tumor	60	M				adenocarcinoma	T1	N0	M0			14	1	12	1
GSM748131	GSE30219	Tumor	73	M				adenocarcinoma	T1	N0	M0			13	1	13	0
GSM748132	GSE30219	Tumor	63	M				SQC	T1	N0	M0			1	1	1	0
GSM748133	GSE30219	Tumor	60	M				SQC	T1	N0	M0			256	0	256	0
GSM748134	GSE30219	Tumor	78	F				adenocarcinoma	T1	N0	M0			0	1	0	0
GSM748135	GSE30219	Tumor	61	M				adenocarcinoma	T1	N0	M0			175	0	175	0
GSM748136	GSE30219	Tumor	81	M				SQC	T1	N0	M0			84	1	84	0
GSM748137	GSE30219	Tumor	57	M				adenocarcinoma	T1	N0	M0			49	0	49	0
GSM748138	GSE30219	Tumor	53	M				adenocarcinoma	T1	N0	M0			38	1	25	1
GSM748139	GSE30219	Tumor	65	M				adenocarcinoma	T1	N0	M0			150	1	150	0
GSM748140	GSE30219	Tumor	57	M				adenocarcinoma	T1	N0	M0			28	1	16	1
GSM748141	GSE30219	Tumor	59	M				SQC	T1	N0	M0			124	1	124	0
GSM748142	GSE30219	Tumor	52	M				adenocarcinoma	T1	N0	M0			99	0	99	0
GSM748143	GSE30219	Tumor	56	M				adenocarcinoma	T1	N0	M0			127	1	127	0
GSM748144	GSE30219	Tumor	82	M				Other	T1	N0	M0			53	1	53	0
GSM748145	GSE30219	Tumor	67	M				SQC	T1	N0	M0			80	0	80	0
GSM748146	GSE30219	Tumor	56	M				adenocarcinoma	T1	N0	M0			18	1	18	0
GSM748147	GSE30219	Tumor	76	M				adenocarcinoma	T1	N0	M0			117	0	117	0
GSM748148	GSE30219	Tumor	76	M				SQC	T1	N0	M0			68	1	68	0
GSM748149	GSE30219	Tumor	56	M				LCC	T1	N0	M0			122	0	122	0
GSM748150	GSE30219	Tumor	56	M				adenocarcinoma	T1	N0	M0			56	0	56	0
GSM748151	GSE30219	Tumor	63	M				SQC	T1	N0	M0			57	1	57	0
GSM748152	GSE30219	Tumor	55	M				adenocarcinoma	T1	N0	M0			177	0	177	0
GSM748153	GSE30219	Normal
GSM748154	GSE30219	Tumor	71	M				SQC	T1	N0	M0			40	1	33	1
GSM748155	GSE30219	Tumor	56	F				SQC	T1	N0	M0			12	1	12	0
GSM748156	GSE30219	Tumor	67	M				SQC	T1	N0	M0			16	1	6	1
GSM748157	GSE30219	Tumor	62	M				adenocarcinoma	T1	N0	M0			137	0	137	0
GSM748158	GSE30219	Normal
GSM748159	GSE30219	Tumor	46	M				SQC	T1	N0	M0			59	0	59	0
GSM748160	GSE30219	Tumor	63	M				LCC	T1	N0	M0			216	0	216	0
GSM748161	GSE30219	Tumor	56	M				adenocarcinoma	T1	N0	M0			175	1	164	1
GSM748162	GSE30219	Tumor	57	M				adenocarcinoma	T1	N0	M0			89	0	89	0
GSM748163	GSE30219	Tumor	63	M				SQC	T1	N0	M0			89	1	89	0
GSM748164	GSE30219	Tumor	72	M				adenocarcinoma	T1	N0	M0			61	0	61	0
GSM748165	GSE30219	Tumor	72	M				SQC	T1	N0	M0			32	1	17	1
GSM748166	GSE30219	Tumor	44	F				adenocarcinoma	T1	N0	M0			65	0	65	0
GSM748167	GSE30219	Tumor	58	M				adenocarcinoma	T1	N0	M0			123	0	123	0
GSM748168	GSE30219	Normal
GSM748169	GSE30219	Tumor	54	M				adenocarcinoma	T1	N0	M0			129	0	129	0
GSM748170	GSE30219	Tumor	69	F				adenocarcinoma	T1	N0	M0			2	1	2	0
GSM748171	GSE30219	Tumor	77	M				adenocarcinoma	T1	N0	M0			13	1	13	0
GSM748172	GSE30219	Tumor	64	M				SQC	T1	N0	M0			62	0	62	0
GSM748173	GSE30219	Tumor	50	M				adenocarcinoma	T1	N0	M0			14	1	14	0
GSM748174	GSE30219	Tumor	81	M				Other	T1	N0	M0			14	1	14	0
GSM748175	GSE30219	Tumor	61	M				adenocarcinoma	T1	N0	M0			134	0	134	0
GSM748176	GSE30219	Normal
GSM748177	GSE30219	Tumor	63	M				SQC	T1	N0	M0			80	0	80	0
GSM748178	GSE30219	Tumor	74	M				adenocarcinoma	T1	N0	M0			0	1	0	0
GSM748179	GSE30219	Tumor	47	F				adenocarcinoma	T1	N0	M0			11	1	7	1
GSM748180	GSE30219	Tumor	75	M				adenocarcinoma	T1	N0	M0			100	0	100	0
GSM748181	GSE30219	Tumor	56	F				adenocarcinoma	T1	N0	M0			51	0	51	0
GSM748182	GSE30219	Tumor	71	M				SQC	T1	N0	M0			33	1	32	1
GSM748183	GSE30219	Tumor	63	M				SQC	T1	N0	M0			13	1	13	0
GSM748184	GSE30219	Normal
GSM748185	GSE30219	Tumor	61	M				adenocarcinoma	T3	N1	M0			175	0	104	1
GSM748186	GSE30219	Tumor	57	M				adenocarcinoma	T2	N0	M0			22	1	11	1
GSM748187	GSE30219	Tumor	71	M				adenocarcinoma	T2	N0	M0			107	1	107	0
GSM748188	GSE30219	Tumor	71	M				adenocarcinoma	T2	N0	M0			99	1	99	0
GSM748189	GSE30219	Tumor	73	F				adenocarcinoma	T3	N0	M0			21	1	17	1
GSM748191	GSE30219	Tumor	53	M				SQC	T2	N0	M0			172	1	172	0
GSM748192	GSE30219	Tumor	58	M				SQC	T1	N0	M0			63	0
GSM748193	GSE30219	Tumor	64	M				SQC	T4	N1	M0			12	1	8	1
GSM748195	GSE30219	Tumor	57	M				SQC	T4	N1	M0			17	1	11	1
GSM748196	GSE30219	Tumor	60	M				BAS	T4	N1	M0			60	1	41	1
GSM748197	GSE30219	Tumor	64	M				LCNE	T2	N0	M0			14	1
GSM748198	GSE30219	Tumor	74	M				LCNE	T2	N0	M0			14	1	14	1
GSM748199	GSE30219	Tumor	52	F				LCNE	T1	N0	M0			11	1
GSM748200	GSE30219	Tumor	68	M				LCNE	T2	N0	M0			107	1
GSM748201	GSE30219	Tumor	74	M				LCNE	T2	N2	M0			2	1
GSM748202	GSE30219	Tumor	77	M				LCNE	T4	N2	M0			28	1	28	0
GSM748203	GSE30219	Tumor	49	M				LCNE	TX	NX	M1			20	1
GSM748206	GSE30219	Tumor	71	M				LCNE	T1	N0	M0			91	1
GSM748207	GSE30219	Tumor	46	M				LCNE	T3	N1	M0			13	1
GSM748209	GSE30219	Tumor	68	M				SCC	T4	N2	M0			13	1	4	1
GSM748210	GSE30219	Tumor	55	M				LCNE	T3	N1	M0			24	1	18	1
GSM748211	GSE30219	Tumor	53	M				LCNE	T2	N0	M0			91	0	41	1
GSM748212	GSE30219	Tumor	68	M				LCNE	T2	N1	M0			87	1	5	1
GSM748213	GSE30219	Tumor	67	M				SCC	T2	N2	M1			14	1	9	1
GSM748214	GSE30219	Tumor	70	M				LCNE	T2	N1	M0			3	1	3	0
GSM748215	GSE30219	Tumor	54	M				SCC	T4	N3	M0			14	1	10	1
GSM748216	GSE30219	Tumor	41	M				LCNE	T3	N0	M0			56	0
GSM748217	GSE30219	Tumor	51	M				LCNE	T1	N0	M0			32	1
GSM748218	GSE30219	Tumor	68	M				SCC	T3	N2	M0			31	1
GSM748219	GSE30219	Tumor	71	M				SCC	T4	N1	M1			6	1
GSM748220	GSE30219	Tumor	58	F				CARCI	T2	N0	M0			85	0	4	1
GSM748221	GSE30219	Tumor	58	M				CARCI	T2	N0	M1			85	1	70	1
GSM748222	GSE30219	Tumor	ND	M				CARCI	TX	NX	M0			11	1	11	1
GSM748223	GSE30219	Tumor	57	M				CARCI	T2	N1	M0			184	0	184	0
GSM748224	GSE30219	Tumor	52	F				CARCI	T2	N1	M0			155	0	155	0
GSM748225	GSE30219	Tumor	29	M				CARCI	T1	N0	M0			123	0	123	0
GSM748226	GSE30219	Tumor	63	M				CARCI	T1	N0	M0			179	1	179	0
GSM748227	GSE30219	Tumor	15	M				CARCI	T1	N1	M0			119	0	119	0
GSM748228	GSE30219	Tumor	24	F				CARCI	T1	N0	M0			204	0	204	0
GSM748229	GSE30219	Tumor	48	M				LCNE	T1	N1	M0			53	0
GSM748232	GSE30219	Normal
GSM748233	GSE30219	Normal
GSM748234	GSE30219	Normal
GSM748235	GSE30219	Normal
GSM748239	GSE30219	Tumor	65	M				adenocarcinoma	T2	N0	M0			4	1	3	1
GSM748240	GSE30219	Tumor	52	M				adenocarcinoma	T2	N0	M0			23	1	16	1
GSM748242	GSE30219	Tumor	64	F				adenocarcinoma	T2	N1	M0			17	1	13	1
GSM748243	GSE30219	Tumor	62	M				adenocarcinoma	T2	N0	M0			103	1	102	1
GSM748244	GSE30219	Tumor	56	M				SCC	T3	N3	M0			28	1	16	1
GSM748245	GSE30219	Tumor	59	M				SCC	T2	N2	M0			17	1	17	1
GSM748246	GSE30219	Tumor	62	M				SCC	TX	N3	M1			11	1	11	0
GSM748247	GSE30219	Tumor	47	M				SCC	T4	N2	M0			19	1	11	1
GSM748248	GSE30219	Tumor	83	M				SCC	TX	N2	M0			14	1	3	1
GSM748249	GSE30219	Tumor	71	M				SCC	T1	N0	M0			30	1	30	0
GSM748250	GSE30219	Tumor	51	M				SCC	T1	N0	M0			77	0	77	0
GSM748251	GSE30219	Tumor	69	F				SCC	TX	N2	M1			2	1	2	0
GSM748252	GSE30219	Tumor	69	M				SCC	T1	N1	M0			140	0	140	0
GSM748253	GSE30219	Tumor	73	M				SCC	T2	N3	M0			11	1	10	1
GSM748254	GSE30219	Tumor	68	M				SCC	T4	N2	M0			4	1	4	0
GSM748255	GSE30219	Tumor	68	M				SCC	T3	N2	M0			6	1	4	1
GSM748256	GSE30219	Tumor	75	M				SCC	T2	N3	M0			54	1	51	1
GSM748257	GSE30219	Tumor	67	M				SCC	T2	N3	M0			8	1	2	1
GSM748258	GSE30219	Tumor	40	M				SCC	TX	N2	M0			10	1	5	1
GSM748259	GSE30219	Tumor	39	F				CARCI	T1	N0	M0			121	0	121	0
GSM748260	GSE30219	Tumor	51	F				CARCI	T1	N0	M0			111	0	111	0
GSM748261	GSE30219	Tumor	71	M				CARCI	T1	N0	M0			105	0	105	0
GSM748262	GSE30219	Tumor	57	F				CARCI	T1	N0	M0			115	0	115	0
GSM748263	GSE30219	Tumor	17	M				CARCI	T1	N0	M0			102	1	102	0
GSM748264	GSE30219	Tumor	69	M				adenocarcinoma	T2	N0	M0			42	1	21	1
GSM748265	GSE30219	Tumor	70	M				SCC	T1	N0	M0			59	1	59	0
GSM748266	GSE30219	Tumor	27	F				CARCI	T2	N0	M0			66	0	66	0
GSM748267	GSE30219	Tumor	42	F				CARCI	T1	N0	M0			244	0	244	0
GSM748268	GSE30219	Tumor	31	M				CARCI	T2	N0	M0			223	0	223	0
GSM748269	GSE30219	Tumor	25	M				CARCI	T1	N0	M0			157	0	157	0
GSM748270	GSE30219	Tumor	56	M				CARCI	T1	N1	M0			175	0	175	0
GSM748271	GSE30219	Tumor	69	F				adenocarcinoma	T2	N0	M0			23	1	16	1
GSM748272	GSE30219	Tumor	35	F				CARCI	T1	N0	M0			78	0	78	0
GSM748273	GSE30219	Tumor	80	M				CARCI	T2	N0	M0			67	0	67	0
GSM748274	GSE30219	Tumor	31	M				CARCI	T2	N0	M0			180	0	180	0
GSM748275	GSE30219	Tumor	66	M				CARCI	T2	N0	M0			52	1	52	0
GSM748276	GSE30219	Tumor	53	M				adenocarcinoma	T2	N1	M0			55	1	28	1
GSM748277	GSE30219	Tumor	70	M				adenocarcinoma	T2	N0	M0			193	1	193	0
GSM748278	GSE30219	Tumor	70	M				adenocarcinoma	T1	N0	M0			23	1	12	1
GSM748279	GSE30219	Tumor	44	M				adenocarcinoma	T2	N0	M0			205	0	205	0
GSM748280	GSE30219	Tumor	57	M				SQC	T1	N1	M0			23	1	8	1
GSM748281	GSE30219	Tumor	80	M				SQC	T3	N0	M0			4	1	4	0
GSM748282	GSE30219	Tumor	65	M				SQC	T2	N0	M0			13	1	6	1
GSM748283	GSE30219	Tumor	50	M				SQC	T1	N1	M0			67	1	55	1
GSM748284	GSE30219	Tumor	60	M				SQC	T3	N0	M0			125	1	125	0
GSM748285	GSE30219	Tumor	70	M				SQC	T3	N1	M0			22	1	13	1
GSM748286	GSE30219	Tumor	48	M				SQC	T2	N1	M0			204	0	204	0
GSM748287	GSE30219	Tumor	58	F				SQC	T3	N1	M0			26	1	15	1
GSM748288	GSE30219	Tumor	66	F				SQC	T2	N1	M0			13	1	5	1
GSM748291	GSE30219	Tumor	65	M				BAS	T1	N0	M0			42	1	3	1
GSM748292	GSE30219	Tumor	64	M				BAS	T1	N0	M0			179	1	179	0
GSM748294	GSE30219	Tumor	66	M				BAS	T2	N1	M0			48	1	48	0
GSM748295	GSE30219	Tumor	70	M				BAS	T1	N1	M0			50	1	50	0
GSM748296	GSE30219	Tumor	50	M				LCNE	T3	N0	M0			3	0	3	0
GSM748297	GSE30219	Tumor	75	M				LCNE	T2	N1	M0			8	1	5	1
GSM748298	GSE30219	Tumor	65	F				LCNE	T1	N1	M0			188	0	188	0
GSM748299	GSE30219	Tumor	79	M				LCNE	T2	N2	M0			2	1	2	1
GSM748300	GSE30219	Tumor	80	M				LCNE	T2	N0	M0			9	1	7	1
GSM748301	GSE30219	Tumor	44	M				BAS	T1	N1	M0			29	1	24	1
GSM748302	GSE30219	Tumor	68	M				BAS	T1	N0	M0			91	0	91	0
GSM748303	GSE30219	Tumor	55	M				BAS	T2	N1	M0			83	0	17	1
GSM748304	GSE30219	Tumor	67	M				BAS	T3	N0	M0			13	1	13	1
GSM748305	GSE30219	Tumor	56	M				BAS	T3	N1	M0			10	1	7	1
GSM748306	GSE30219	Tumor	82	M				BAS	T2	N1	M0			40	1	22	1
GSM748307	GSE30219	Tumor	57	M				BAS	T3	N1	M0			76	1	76	0
GSM748308	GSE30219	Tumor	64	M				BAS	T3	N1	M0			27	1	27	1
GSM748309	GSE30219	Tumor	54	M				BAS	T1	N1	M0			9	1	4	1
GSM748310	GSE30219	Tumor	64	M				BAS	T1	N0	M0			63	1	58	1
GSM748311	GSE30219	Tumor	50	M				BAS	T2	N1	M1			54	1	48	1
GSM748312	GSE30219	Tumor	60	M				SQC	T1	N0	M0			14	1	13	1
GSM748313	GSE30219	Tumor	57	M				BAS	T3	N2	M0			11	1	3	1
GSM748314	GSE30219	Tumor	65	M				BAS	T3	N1	M0			143	1	143	0
GSM748315	GSE30219	Tumor	62	M				BAS	T4	N2	M0			26	1	10	1
GSM748316	GSE30219	Tumor	65	F				BAS	T3	N2	M0			21	1	19	1
GSM748317	GSE30219	Tumor	69	M				BAS	T4	N1	M0			9	1	5	1
GSM748318	GSE30219	Tumor	77	M				BAS	T3	N1	M0			134	1	134	0
GSM748319	GSE30219	Tumor	71	M				BAS	T2	N1	M0			0	1	0	0
GSM748320	GSE30219	Tumor	55	M				BAS	T1	N1	M0			23	1	16	1
GSM748321	GSE30219	Tumor	50	M				BAS	T4	N1	M0			34	1	34	0
GSM748323	GSE30219	Tumor	50	M				BAS	T3	N1	M0			5	1	5	0
GSM748324	GSE30219	Tumor	73	M				BAS	T1	N0	M0			52	1	52	0
GSM748325	GSE30219	Tumor	66	M				BAS	T2	N0	M0			17	1	8	1
GSM748326	GSE30219	Tumor	79	M				BAS	T1	N0	M0			11	1	11	0
GSM748327	GSE30219	Tumor	53	F				BAS	T2	N1	M0			34	1	28	1
GSM748328	GSE30219	Tumor	58	M				BAS	T2	N0	M0			3	1	3	0
GSM748329	GSE30219	Tumor	70	M				BAS	T2	N1	M0			2	1	2	0
GSM748330	GSE30219	Tumor	64	M				BAS	T4	N2	M0			8	1	8	0
GSM748331	GSE30219	Tumor	82	M				BAS	T1	N0	M0			0	1	0	0
GSM748332	GSE30219	Tumor	77	M				BAS	T2	N2	M0			27	1	27	0
GSM748333	GSE30219	Tumor	61	M				BAS	T3	N1	M0			45	1	41	1
GSM748334	GSE30219	Tumor	70	M				BAS	T1	N1	M0			100	1	93	1
GSM748335	GSE30219	Tumor	71	M				BAS	T2	N0	M0			88	1	88	0
GSM748336	GSE30219	Tumor	67	F				LCNE	T3	N2	M0			7	1	5	1
GSM748337	GSE30219	Tumor	74	M				LCNE	T2	N2	M1			3	1	2	1
GSM748338	GSE30219	Tumor	61	M				LCNE	T2	N0	M0			1	1	1	0
GSM748339	GSE30219	Tumor	47	M				LCNE	T4	N2	M0			4	1	2	1
GSM748341	GSE30219	Tumor	46	M				LCNE	T1	N2	M0			206	0	206	0
GSM748342	GSE30219	Tumor	63	M				LCNE	T2	N0	M0			104	1	104	0
GSM748343	GSE30219	Tumor	69	M				LCNE	T4	N3	M0			7	1	4	1
GSM748344	GSE30219	Tumor	54	M				LCNE	T4	N2	M0			140	1	79	1
GSM748345	GSE30219	Tumor	45	M				LCNE	T4	N2	M0			9	1	9	0
GSM748346	GSE30219	Tumor	58	M				LCNE	T2	N0	M0			23	1	15	1
GSM748347	GSE30219	Tumor	55	M				LCNE	T3	N3	M0			11	1	8	1
GSM748348	GSE30219	Tumor	54	M				LCNE	T3	N3	M0			11	1	10	1
GSM748349	GSE30219	Tumor	72	M				LCNE	T2	N0	M0			174	1	6	1
GSM748350	GSE30219	Tumor	74	M				LCNE	T2	N1	M0			8	1	5	1
GSM748351	GSE30219	Tumor	59	F				LCNE	T3	N1	M0			105	1	63	1
GSM748352	GSE30219	Tumor	39	M				LCNE	T4	N2	M0			29	1	9	1
GSM748353	GSE30219	Tumor	65	M				LCNE	T4	N2	M0			118	1	20	1
GSM748354	GSE30219	Tumor	62	M				LCNE	T4	N1	M0			7	1	7	0
GSM748355	GSE30219	Tumor	77	M				LCNE	T2	N0	M0			81	1	81	0
GSM748356	GSE30219	Tumor	53	M				LCNE	T2	N0	M0			18	1
GSM748357	GSE30219	Tumor	52	M				LCNE	T1	N0	M0			6	1	2	1
GSM748358	GSE30219	Tumor	66	F				LCNE	T2	N2	M0			118	1	103	1
GSM748359	GSE30219	Tumor	71	M				LCNE	T3	N2	M0			6	1	6	0
GSM748360	GSE30219	Tumor	49	M				LCNE	T2	N1	M0			111	0	111	0
GSM748361	GSE30219	Tumor	77	M				LCNE	T1	N0	M0			19	1	7	1
GSM748362	GSE30219	Tumor	67	F				LCNE	T3	N0	M0			116	0	41	1
GSM748363	GSE30219	Tumor	56	M				LCNE	T2	N1	M0			8	1	8	0
GSM748364	GSE30219	Tumor	51	M				LCNE	T3	N0	M0			20	1	10	1
GSM748365	GSE30219	Tumor	60	M				LCNE	T1	N2	M0			6	1	4	1
GSM748366	GSE30219	Tumor	66	M				LCNE	T1	N0	M0			2	1	1	1
GSM773540	GSE31210	Tumor	55	F		No		adenocarcinoma				Stage II	Stage II	14.3671	1
GSM773541	GSE31210	Tumor	38	F		Yes		adenocarcinoma				Stage II	Stage II	24.4274	0
GSM773542	GSE31210	Tumor	30	M		Yes		adenocarcinoma				Stage II	Stage II	85.5123	0
[truncated: 4,457 more rows]
