# Supplementary material for: A novel methionine metabolism-related signature predicts prognosis and immunotherapy response in lung adenocarcinoma
Source: Aging (Albany NY). 2023 May 2;15(9):3498–523. doi: 10.18632/aging.204687 (PMC10449287; doi:10.18632/aging.204687)
Supplement: Supplementary Table 2 [file aging-15-204687-s003.xlsx]

## Sheet: Table S2
Supplementary Table 2. The difference of mRNA expression levels of 68 MRGs between normal and LUAD samples in 13 datasets.
GSE	Symbol	Log2FC	pvalue	stars
GSE10799	DNMT1
GSE18842	DNMT1
GSE19188	DNMT1
GSE27262	DNMT1
GSE30219	DNMT1
GSE31210	DNMT1
GSE31547	DNMT1
GSE33356	DNMT1
GSE63459	DNMT1
GSE68465	DNMT1
GSE68571	DNMT1
GSE81089	DNMT1
GSE87340	DNMT1
TCGA.LUAD	DNMT1
GSE10799	COMT
GSE18842	COMT
GSE19188	COMT
GSE27262	COMT
GSE30219	COMT
GSE31210	COMT
GSE31547	COMT
GSE33356	COMT
GSE63459	COMT	-0.250517	5.87401e-05	***
GSE68465	COMT
GSE68571	COMT
GSE81089	COMT
GSE87340	COMT	0.0341412	0.648992
TCGA.LUAD	COMT
GSE10799	AMD1
GSE18842	AMD1
GSE19188	AMD1
GSE27262	AMD1
GSE30219	AMD1
GSE31210	AMD1
GSE31547	AMD1
GSE33356	AMD1
GSE63459	AMD1	-0.222722	0.0279568	*
GSE68465	AMD1
GSE68571	AMD1
GSE81089	AMD1
GSE87340	AMD1	-0.112407	0.339501
TCGA.LUAD	AMD1	-0.409116	1.73415e-10	***
GSE10799	MTR	-0.175423	0.421053
GSE18842	MTR	-0.0646782	0.239747
GSE19188	MTR	-0.125808	0.00877904	**
GSE27262	MTR	0.130341	0.271363
GSE30219	MTR	-0.154757	0.143643
GSE31210	MTR	-0.0923847	0.224489
GSE31547	MTR	0.0438131	0.403487
GSE33356	MTR	0.181809	0.000677566	***
GSE63459	MTR	-0.156052	0.0191689	*
GSE68465	MTR	-0.534348	7.82461e-07	***
GSE68571	MTR	-0.176889	0.894955
GSE81089	MTR	-0.00557234	0.761392
GSE87340	MTR	-0.0151428	0.486324
TCGA.LUAD	MTR	-0.16959	0.00977552	**
GSE10799	SRM	1.43134	0.0144479	*
GSE18842	SRM	0.887679	7.56473e-12	***
GSE19188	SRM	0.821085	4.37789e-13	***
GSE27262	SRM	0.702846	2.99567e-07	***
GSE30219	SRM	0.860866	2.39541e-06	***
GSE31210	SRM	0.412679	6.29859e-06	***
GSE31547	SRM	1.04389	1.69746e-13	***
GSE33356	SRM	0.566213	2.33173e-10	***
GSE63459	SRM	0.554598	2.39035e-06	***
GSE68465	SRM	-1.28744	4.54591e-12	***
GSE68571	SRM	0.817591	0.0584342
GSE81089	SRM	0.852625	1.75937e-05	***
GSE87340	SRM	0.630874	4.26361e-08	***
TCGA.LUAD	SRM	1.0345	3.72638e-25	***
GSE10799	SLC7A5	2.83941	0.0144479	*
GSE18842	SLC7A5	2.36231	1.61881e-19	***
GSE19188	SLC7A5	1.36255	2.06944e-15	***
GSE27262	SLC7A5	1.2061	2.11684e-06	***
GSE30219	SLC7A5	1.98063	2.08947e-06	***
GSE31210	SLC7A5	0.775504	7.53373e-05	***
GSE31547	SLC7A5	1.16762	8.00086e-06	***
GSE33356	SLC7A5	0.864457	7.54271e-07	***
GSE63459	SLC7A5	0.877192	4.5619e-05	***
GSE68465	SLC7A5	-2.13541	3.7739e-12	***
GSE68571	SLC7A5	0.776463	0.201854
GSE81089	SLC7A5	1.95144	2.07094e-07	***
GSE87340	SLC7A5	1.40592	1.58178e-09	***
TCGA.LUAD	SLC7A5	2.3097	1.38353e-27	***
GSE10799	EIF2B2	0.0594904	0.957688
GSE18842	EIF2B2	0.45578	8.63225e-08	***
GSE19188	EIF2B2	0.436563	4.78398e-10	***
GSE27262	EIF2B2	0.440895	3.18283e-08	***
GSE30219	EIF2B2	0.489052	5.66151e-05	***
GSE31210	EIF2B2	0.293262	0.000124311	***
GSE31547	EIF2B2	0.376634	0.000250209	***
GSE33356	EIF2B2	0.341977	5.5537e-06	***
GSE63459	EIF2B2	0.270958	0.000367157	***
GSE68465	EIF2B2	-0.573947	6.32654e-10	***
GSE68571	EIF2B2	0.25387	0.201852
GSE81089	EIF2B2	0.467274	3.74688e-07	***
GSE87340	EIF2B2	0.318363	0.000546129	***
TCGA.LUAD	EIF2B2	0.538806	1.45878e-19	***
GSE10799	SETDB1	0.371484	0.263343
GSE18842	SETDB1	0.299471	0.000868436	***
GSE19188	SETDB1	0.355453	6.40232e-07	***
GSE27262	SETDB1	0.488824	1.65429e-06	***
GSE30219	SETDB1	0.32731	0.00421592	**
GSE31210	SETDB1	0.221864	0.00153147	**
GSE31547	SETDB1	0.488659	7.36289e-07	***
GSE33356	SETDB1	0.433057	3.11763e-08	***
GSE63459	SETDB1	0.350702	1.72837e-05	***
GSE68465	SETDB1	0.105105	0.143335
GSE68571	SETDB1	0.333794	0.159035
GSE81089	SETDB1	0.440938	1.58036e-06	***
GSE87340	SETDB1	0.268122	0.00028271	***
TCGA.LUAD	SETDB1	0.642585	1.78434e-22	***
GSE10799	CBS	0.868619	0.0733855
GSE18842	CBS	0.643623	0.000808545	***
GSE19188	CBS	0.538755	0.000495328	***
GSE27262	CBS	0.0106282	0.175944
GSE30219	CBS	0.363945	0.236022
GSE31210	CBS	0.13228	0.744266
GSE31547	CBS	0.23425	0.392464
GSE33356	CBS	0.0039605	0.569032
GSE63459	CBS	0.163493	0.819605
GSE68465	CBS	-1.77073	7.7215e-12	***
GSE68571	CBS	1.44821	0.0666861
GSE81089	CBS	0.357204	0.321355
GSE87340	CBS	0.0759253	0.553308
TCGA.LUAD	CBS	0.666221	0.000161221	***
GSE10799	CTH	0.548543	0.79257
GSE18842	CTH	0.184614	0.465207
GSE19188	CTH	0.160247	0.170817
GSE27262	CTH	0.319278	0.0128173	*
GSE30219	CTH	0.137263	0.642773
GSE31210	CTH	0.188211	0.104973
GSE31547	CTH	0.30028	0.164132
GSE33356	CTH	0.249146	0.0129468	*
GSE63459	CTH	0.125737	0.00508621	**
GSE68465	CTH	-0.880564	8.86595e-08	***
GSE68571	CTH
GSE81089	CTH	0.257343	0.17606
GSE87340	CTH	0.459378	1.04236e-06	***
TCGA.LUAD	CTH	0.952681	1.47634e-15	***
GSE10799	GAMT	0.80649	0.00973451	**
GSE18842	GAMT	0.430386	4.61599e-08	***
GSE19188	GAMT	0.88418	3.35337e-09	***
GSE27262	GAMT	0.389224	6.73795e-05	***
GSE30219	GAMT	0.510395	0.00013854	***
GSE31210	GAMT	0.848253	2.89331e-05	***
GSE31547	GAMT	0.075727	0.883047
GSE33356	GAMT	0.385182	9.60215e-07	***
GSE63459	GAMT	0.253238	0.0101137	*
GSE68465	GAMT	-2.72008	1.03221e-12	***
GSE68571	GAMT
GSE81089	GAMT	1.09042	4.61461e-05	***
GSE87340	GAMT	0.611542	5.69525e-05	***
TCGA.LUAD	GAMT	0.907913	1.1816e-11	***
GSE10799	EZH2	3.22149	0.0085754	**
GSE18842	EZH2	2.55804	2.53061e-21	***
GSE19188	EZH2	2.02762	1.15743e-19	***
GSE27262	EZH2	2.08412	4.29394e-11	***
GSE30219	EZH2	2.32806	2.05239e-07	***
GSE31210	EZH2	1.17542	1.13323e-08	***
GSE31547	EZH2	1.39755	2.04053e-07	***
GSE33356	EZH2	1.19594	1.2787e-09	***
GSE63459	EZH2	0.396525	5.61429e-05	***
GSE68465	EZH2	-2.14992	4.84157e-13	***
GSE68571	EZH2
GSE81089	EZH2	1.77304	5.20119e-11	***
GSE87340	EZH2	0.671941	1.23339e-05	***
TCGA.LUAD	EZH2	2.58851	4.17097e-34	***
GSE10799	CDO1	-5.24113	0.00834426	**
GSE18842	CDO1	-2.77484	7.55279e-20	***
GSE19188	CDO1	-2.08871	5.55992e-19	***
GSE27262	CDO1	-1.25424	6.32858e-14	***
GSE30219	CDO1	-2.7583	1.52097e-07	***
GSE31210	CDO1	-2.47964	2.23561e-11	***
GSE31547	CDO1	-1.5391	1.58288e-11	***
GSE33356	CDO1	-2.28959	2.98987e-15	***
GSE63459	CDO1	-1.0272	7.1364e-13	***
GSE68465	CDO1	-0.178592	0.085172
GSE68571	CDO1	-1.82258	0.0267395	*
GSE81089	CDO1
GSE87340	CDO1	-1.63911	3.55222e-09	***
TCGA.LUAD	CDO1	-3.23565	6.07206e-33	***
GSE10799	GOT1	0.34346	0.55934
GSE18842	GOT1	1.01771	3.4685e-16	***
GSE19188	GOT1	0.455927	4.82016e-06	***
GSE27262	GOT1	0.623836	1.32797e-05	***
GSE30219	GOT1	0.807585	8.76349e-06	***
GSE31210	GOT1	0.544748	6.29859e-06	***
GSE31547	GOT1	0.375978	0.0262772	*
GSE33356	GOT1	0.46257	0.000256492	***
GSE63459	GOT1	0.398384	0.000395682	***
GSE68465	GOT1	-0.447059	0.000579324	***
GSE68571	GOT1	1.51229	0.0510444
GSE81089	GOT1	0.640437	1.52079e-06	***
GSE87340	GOT1	0.503429	3.76826e-06	***
TCGA.LUAD	GOT1	0.829919	1.65245e-19	***
GSE10799	HNMT	-0.651312	0.25387
GSE18842	HNMT	-1.38791	9.08697e-11	***
GSE19188	HNMT	-0.551686	6.55848e-09	***
GSE27262	HNMT	0.352374	0.0408792	*
GSE30219	HNMT	-1.34019	9.68648e-06	***
GSE31210	HNMT	0.213789	0.00449998	**
GSE31547	HNMT	0.0602386	0.945271
GSE33356	HNMT	0.238275	0.0136302	*
GSE63459	HNMT	-0.211155	0.0198533	*
GSE68465	HNMT	0.184457	0.0706971
GSE68571	HNMT	-0.334863	0.4905
GSE81089	HNMT	-0.684156	1.33112e-05	***
GSE87340	HNMT	0.157763	0.49718
TCGA.LUAD	HNMT	-0.43684	9.44575e-05	***
GSE10799	MTAP	0.415906	0.875129
GSE18842	MTAP	0.256664	0.0138355	*
GSE19188	MTAP	0.133342	0.00985148	**
GSE27262	MTAP	0.223138	0.0121001	*
GSE30219	MTAP	0.0542405	0.378924
GSE31210	MTAP	-0.10468	0.494251
GSE31547	MTAP	-0.472432	0.274535
GSE33356	MTAP	-0.123075	0.161884
GSE63459	MTAP	0.110324	0.112332
GSE68465	MTAP	-0.72552	3.43162e-06	***
GSE68571	MTAP
GSE81089	MTAP	0.0386775	0.283542
GSE87340	MTAP	-0.297246	0.0530679
TCGA.LUAD	MTAP	0.135759	0.000114628	***
GSE10799	AHCY	0.810797	0.131041
GSE18842	AHCY	1.40566	3.37664e-19	***
GSE19188	AHCY	1.03526	5.53952e-18	***
GSE27262	AHCY	0.899518	5.9014e-12	***
GSE30219	AHCY	1.06728	2.76123e-07	***
GSE31210	AHCY	0.773281	1.26981e-10	***
GSE31547	AHCY	0.596921	1.63367e-06	***
GSE33356	AHCY	0.72294	1.03553e-15	***
GSE63459	AHCY	0.810624	8.31156e-08	***
GSE68465	AHCY	-0.987646	8.43295e-11	***
GSE68571	AHCY	0.416057	0.181885
GSE81089	AHCY	0.818989	1.94639e-07	***
GSE87340	AHCY	0.71675	3.27895e-07	***
TCGA.LUAD	AHCY	0.914628	5.47115e-22	***
GSE10799	MAT2A	-0.917168	0.0144479	*
GSE18842	MAT2A	-1.03845	2.5241e-19	***
GSE19188	MAT2A	0.259273	0.0394208	*
GSE27262	MAT2A	-0.429768	0.00347717	**
GSE30219	MAT2A	-0.312893	0.00491998	**
GSE31210	MAT2A	-0.183471	0.291868
GSE31547	MAT2A	-0.376244	0.196523
GSE33356	MAT2A	-0.426938	8.1782e-05	***
GSE63459	MAT2A	0.012785	0.684174
GSE68465	MAT2A	-0.303668	3.29874e-05	***
GSE68571	MAT2A
GSE81089	MAT2A	0.0137655	0.71213
GSE87340	MAT2A	0.097994	0.113696
TCGA.LUAD	MAT2A	-0.0810076	0.497303
GSE10799	MAT1A	0.111941	0.563703
GSE18842	MAT1A	0.0993385	0.20941
GSE19188	MAT1A	-0.355848	0.0890752
GSE27262	MAT1A	0.0321789	0.590014
GSE30219	MAT1A	0.109506	0.24717
GSE31210	MAT1A	-0.119055	0.596476
GSE31547	MAT1A	0.385584	0.0396006	*
GSE33356	MAT1A	0.121221	0.099336
GSE63459	MAT1A	0.040875	0.321836
GSE68465	MAT1A	-1.0394	1.25539e-06	***
GSE68571	MAT1A
GSE81089	MAT1A
GSE87340	MAT1A	0.290887	0.105903
TCGA.LUAD	MAT1A	0.354139	0.262146
GSE10799	PNMT	-0.145952	0.591143
GSE18842	PNMT	-0.115715	0.102827
GSE19188	PNMT	-0.390183	0.0387383	*
GSE27262	PNMT	-0.492717	2.25301e-05	***
GSE30219	PNMT	-0.000415443	0.976643
GSE31210	PNMT	-1.29191	1.57609e-06	***
GSE31547	PNMT	-0.648151	0.045867	*
GSE33356	PNMT	-0.180541	0.0154249	*
GSE63459	PNMT	-0.0347841	0.306052
GSE68465	PNMT	-0.739275	0.000126884	***
GSE68571	PNMT	-0.247558	0.284211
GSE81089	PNMT
GSE87340	PNMT	-0.574339	4.79754e-05	***
TCGA.LUAD	PNMT	-1.64012	1.66868e-11	***
GSE10799	PCMT1	-0.0545416	0.957688
GSE18842	PCMT1	-0.246088	0.000121383	***
GSE19188	PCMT1	0.0537901	0.550693
GSE27262	PCMT1	-0.169926	0.00483323	**
GSE30219	PCMT1	-0.0988007	0.137827
GSE31210	PCMT1	-0.197233	0.000210288	***
GSE31547	PCMT1	-0.326392	0.00139741	**
GSE33356	PCMT1	-0.327072	5.6171e-05	***
GSE63459	PCMT1	-0.232927	0.000257779	***
GSE68465	PCMT1	-1.01659	2.15042e-12	***
GSE68571	PCMT1	-0.179131	0.607634
GSE81089	PCMT1	-0.0866698	0.224514
GSE87340	PCMT1	-0.164867	0.00301022	**
TCGA.LUAD	PCMT1	-0.267814	1.48909e-06	***
GSE10799	BHMT	0.0164397	0.77283
GSE18842	BHMT	0.108095	0.0996941
GSE19188	BHMT	0.426696	0.105745
GSE27262	BHMT	0.360505	0.0773431
GSE30219	BHMT	0.259548	0.0508933
GSE31210	BHMT	0.52442	0.202773
GSE31547	BHMT	0.651465	0.0291888	*
GSE33356	BHMT	0.202564	0.0011692	**
GSE63459	BHMT	0.15111	0.00295701	**
GSE68465	BHMT	0.349422	0.272757
GSE68571	BHMT
GSE81089	BHMT
GSE87340	BHMT	0.238553	0.290948
TCGA.LUAD	BHMT	0.522688	0.175214
GSE10799	MTHFD1	0.749783	0.0289622	*
GSE18842	MTHFD1	0.751661	5.20691e-13	***
GSE19188	MTHFD1	0.531417	2.68595e-10	***
GSE27262	MTHFD1	0.733575	5.17406e-07	***
GSE30219	MTHFD1	0.742882	2.5835e-06	***
GSE31210	MTHFD1	0.266945	0.00241146	**
GSE31547	MTHFD1	0.750335	1.75645e-05	***
GSE33356	MTHFD1	0.559639	4.85225e-12	***
GSE63459	MTHFD1	0.119907	0.00647039	**
GSE68465	MTHFD1	-1.3271	8.41512e-13	***
GSE68571	MTHFD1	0.765141	0.0546352
GSE81089	MTHFD1	0.545165	2.24903e-07	***
GSE87340	MTHFD1	0.233976	0.0468557	*
TCGA.LUAD	MTHFD1	0.574237	1.22444e-16	***
GSE10799	PRMT2	-0.879611	0.109391
GSE18842	PRMT2	-0.201075	0.00398508	**
GSE19188	PRMT2	-0.228822	8.78809e-05	***
GSE27262	PRMT2	0.159315	0.772986
GSE30219	PRMT2	-0.159446	0.0637738
GSE31210	PRMT2	0.00167605	0.969925
GSE31547	PRMT2	-0.0969292	0.461267
GSE33356	PRMT2	-0.0781052	0.428041
GSE63459	PRMT2	-0.0968182	0.127966
GSE68465	PRMT2	0.237651	0.00144796	**
GSE68571	PRMT2	-0.287081	0.386749
GSE81089	PRMT2	-0.154337	0.0650402
GSE87340	PRMT2	-0.204812	0.000140908	***
TCGA.LUAD	PRMT2	-0.317215	8.60041e-10	***
GSE10799	EIF2B4	-0.0172881	0.957688
GSE18842	EIF2B4	0.254458	6.89516e-06	***
GSE19188	EIF2B4	0.276746	7.70396e-07	***
GSE27262	EIF2B4	0.0784032	0.0517771
GSE30219	EIF2B4	0.185698	0.00950287	**
GSE31210	EIF2B4	0.200127	0.00048312	***
GSE31547	EIF2B4	0.318048	0.000950566	***
GSE33356	EIF2B4	0.125452	0.00973918	**
GSE63459	EIF2B4	0.307125	3.89425e-05	***
GSE68465	EIF2B4	-0.228563	9.51571e-05	***
GSE68571	EIF2B4
GSE81089	EIF2B4	0.484086	3.18223e-08	***
GSE87340	EIF2B4	0.297537	1.30097e-06	***
TCGA.LUAD	EIF2B4	0.493133	1.71512e-23	***
GSE10799	RNMT	0.0607232	0.55934
GSE18842	RNMT	0.500307	2.73355e-07	***
GSE19188	RNMT	0.505372	8.71038e-12	***
GSE27262	RNMT	0.0922175	0.441038
GSE30219	RNMT	0.420866	6.12349e-05	***
GSE31210	RNMT	0.0787742	0.238552
GSE31547	RNMT	0.245495	0.00408511	**
GSE33356	RNMT	0.0785847	0.149655
GSE63459	RNMT	0.226407	0.0228058	*
GSE68465	RNMT	-0.444686	2.33097e-08	***
GSE68571	RNMT
GSE81089	RNMT	0.299719	0.00105721	**
GSE87340	RNMT	0.193593	0.0395193	*
TCGA.LUAD	RNMT	0.149757	0.00661188	**
GSE10799	PRMT1	-0.0405524	0.467201
GSE18842	PRMT1	0.712575	1.03218e-09	***
GSE19188	PRMT1	0.599997	9.04676e-10	***
GSE27262	PRMT1	0.121286	0.396546
GSE30219	PRMT1	0.553851	0.000111933	***
GSE31210	PRMT1	-0.036965	0.912545
GSE31547	PRMT1	-0.111968	0.0277007	*
GSE33356	PRMT1	-0.0973113	0.0146618	*
GSE63459	PRMT1	0.0635625	0.478584
GSE68465	PRMT1	-1.07262	1.53939e-10	***
GSE68571	PRMT1	0.0869144	0.587275
GSE81089	PRMT1	0.575391	0.00665443	**
GSE87340	PRMT1	0.059021	0.339501
TCGA.LUAD	PRMT1	0.389494	4.36564e-10	***
GSE10799	SHMT1	0.2171	0.0220241	*
GSE18842	SHMT1	-0.00623106	0.577437
GSE19188	SHMT1	-0.0550014	0.562759
GSE27262	SHMT1	0.13912	0.0408792	*
GSE30219	SHMT1	0.108258	0.0351633	*
GSE31210	SHMT1	0.371821	0.00445393	**
GSE31547	SHMT1	1.15286	9.06035e-05	***
GSE33356	SHMT1	0.0543082	0.0564067
GSE63459	SHMT1	-0.0900739	0.0265773	*
GSE68465	SHMT1	0.178777	0.0726322
GSE68571	SHMT1
GSE81089	SHMT1	-0.000118517	0.726505
GSE87340	SHMT1	0.439903	0.00250682	**
TCGA.LUAD	SHMT1	0.238777	0.0129703	*
GSE10799	PEMT	-0.249689	0.712074
GSE18842	PEMT	-0.172017	0.00419837	**
GSE19188	PEMT	0.125203	0.531657
GSE27262	PEMT	-0.282596	0.000240471	***
GSE30219	PEMT	0.233037	0.154941
GSE31210	PEMT	-0.206023	0.0125403	*
GSE31547	PEMT	0.0851013	0.241155
GSE33356	PEMT	-0.042353	0.272653
GSE63459	PEMT	-0.0426302	0.0505641
GSE68465	PEMT	-0.883761	3.73436e-08	***
GSE68571	PEMT
GSE81089	PEMT	0.146092	1
GSE87340	PEMT	0.0643905	0.965769
TCGA.LUAD	PEMT	-0.10411	0.0880207
GSE10799	GNMT	0.0594501	0.671406
GSE18842	GNMT	-0.225745	0.000393542	***
GSE19188	GNMT	-0.818361	3.29747e-05	***
GSE27262	GNMT	-0.0560324	0.407412
GSE30219	GNMT	-0.637286	0.000237704	***
GSE31210	GNMT	-0.249869	0.11219
GSE31547	GNMT	-0.249324	0.658802
GSE33356	GNMT	0.0167018	0.380745
GSE63459	GNMT	0.0181591	0.792982
GSE68465	GNMT	-0.363487	0.333603
GSE68571	GNMT
GSE81089	GNMT
GSE87340	GNMT	0.0163558	0.541843
TCGA.LUAD	GNMT	-1.51697	2.44951e-15	***
GSE10799	MTHFR	-1.32347	0.00412797	**
GSE18842	MTHFR	-1.0072	2.57136e-12	***
GSE19188	MTHFR	-0.311688	1.11935e-05	***
GSE27262	MTHFR	-0.0717027	0.325399
GSE30219	MTHFR	-0.81319	2.2205e-06	***
GSE31210	MTHFR	-0.348954	2.89331e-05	***
GSE31547	MTHFR	-0.819782	0.000878527	***
GSE33356	MTHFR	-0.410246	7.8504e-06	***
GSE63459	MTHFR	-0.169459	0.0943194
GSE68465	MTHFR	-0.00796742	0.9874
GSE68571	MTHFR
GSE81089	MTHFR	-0.909382	7.42831e-09	***
GSE87340	MTHFR	-0.3402	0.00116339	**
TCGA.LUAD	MTHFR	-0.564544	3.57042e-10	***
GSE10799	MTRR	0.0176322	0.633643
GSE18842	MTRR	-0.461155	1.99003e-05	***
GSE19188	MTRR	-0.733742	7.67654e-17	***
GSE27262	MTRR	-0.0694285	0.0303874	*
GSE30219	MTRR	-0.167212	0.288367
GSE31210	MTRR	-0.00966689	0.369898
GSE31547	MTRR	-0.159065	0.170272
GSE33356	MTRR	-0.0389438	0.352881
GSE63459	MTRR	-0.0710142	0.109402
GSE68465	MTRR	0.186765	0.239014
GSE68571	MTRR
GSE81089	MTRR	-0.655834	3.184e-06	***
GSE87340	MTRR	-0.231697	0.121926
TCGA.LUAD	MTRR	-0.497997	1.35211e-10	***
GSE10799	DOT1L	-0.624102	0.162066
GSE18842	DOT1L	0.0345206	0.561331
GSE19188	DOT1L	-0.135086	0.213585
GSE27262	DOT1L	-0.299697	0.000262076	***
GSE30219	DOT1L	0.000206063	0.35279
GSE31210	DOT1L	-0.375531	0.000594282	***
GSE31547	DOT1L	0.116315	0.52331
GSE33356	DOT1L	-0.328561	9.73457e-05	***
GSE63459	DOT1L	-0.0557775	0.0732587
GSE68465	DOT1L	0.115257	0.382185
GSE68571	DOT1L
GSE81089	DOT1L	-0.113478	0.415148
GSE87340	DOT1L	-0.358971	1.01874e-05	***
TCGA.LUAD	DOT1L	-0.567586	3.33489e-09	***
GSE10799	MAT2B	-0.659494	0.210526
GSE18842	MAT2B	-0.390505	1.6523e-08	***
GSE19188	MAT2B	-0.327005	4.50373e-05	***
GSE27262	MAT2B	-0.0130567	0.7437
GSE30219	MAT2B	-0.470286	4.46562e-05	***
GSE31210	MAT2B	-0.0240304	0.845338
GSE31547	MAT2B	-0.278277	0.0262772	*
GSE33356	MAT2B	0.0104473	0.953959
GSE63459	MAT2B	-0.0560634	0.408419
GSE68465	MAT2B	0.130677	0.0208307	*
GSE68571	MAT2B
GSE81089	MAT2B	-0.374881	0.000153057	***
GSE87340	MAT2B	-0.0843517	0.121926
TCGA.LUAD	MAT2B	-0.351564	1.49802e-07	***
GSE10799	SMYD2	0.32267	0.303406
GSE18842	SMYD2	0.0550682	0.50744
GSE19188	SMYD2	0.355642	5.47362e-08	***
GSE27262	SMYD2	-0.022103	0.832481
GSE30219	SMYD2	0.121898	0.266559
GSE31210	SMYD2	0.0892912	0.154302
GSE31547	SMYD2	0.092193	0.320427
GSE33356	SMYD2	0.020164	0.981157
GSE63459	SMYD2	0.0508807	0.963368
GSE68465	SMYD2	-0.172836	0.00964528	**
GSE68571	SMYD2
GSE81089	SMYD2	0.251649	0.0319695	*
GSE87340	SMYD2	-0.0879008	0.259153
TCGA.LUAD	SMYD2	0.00534674	0.831944
GSE10799	AHCYL1	-0.0180953	0.957688
GSE18842	AHCYL1	-0.184673	0.000183271	***
GSE19188	AHCYL1	-0.163522	0.0145093	*
GSE27262	AHCYL1	0.383158	3.39069e-05	***
GSE30219	AHCYL1	0.0118004	0.974185
GSE31210	AHCYL1	0.13991	0.0680802
GSE31547	AHCYL1	0.4823	5.54615e-05	***
GSE33356	AHCYL1	0.264612	0.000615355	***
GSE63459	AHCYL1	0.140185	0.290831
GSE68465	AHCYL1	0.0784688	0.399625
GSE68571	AHCYL1
GSE81089	AHCYL1	-0.0186592	0.582559
GSE87340	AHCYL1	0.26381	0.000473287	***
TCGA.LUAD	AHCYL1	0.0426007	0.503867
GSE10799	PRMT5	0.621119	0.0846233
GSE18842	PRMT5	0.962677	6.5826e-18	***
GSE19188	PRMT5	0.792594	1.05926e-15	***
GSE27262	PRMT5	0.701117	5.59779e-10	***
GSE30219	PRMT5	0.85623	2.99684e-07	***
GSE31210	PRMT5	0.403613	2.69032e-06	***
GSE31547	PRMT5	0.564388	0.0142879	*
GSE33356	PRMT5	0.436709	2.11458e-06	***
GSE63459	PRMT5	0.214524	4.88256e-05	***
GSE68465	PRMT5	-1.12712	1.99006e-11	***
GSE68571	PRMT5	0.960033	0.0444538	*
GSE81089	PRMT5	0.799441	6.90164e-11	***
GSE87340	PRMT5	0.453886	1.1987e-08	***
TCGA.LUAD	PRMT5	0.672202	4.67634e-22	***
GSE10799	EIF2B1	-0.138645	0.737205
GSE18842	EIF2B1	0.175862	0.00371554	**
GSE19188	EIF2B1	0.195673	0.00165878	**
GSE27262	EIF2B1	0.0467116	0.658147
GSE30219	EIF2B1	0.317401	4.01488e-05	***
GSE31210	EIF2B1	-0.0824314	0.121362
GSE31547	EIF2B1	0.0282012	0.73133
GSE33356	EIF2B1	0.0960488	0.0299826	*
GSE63459	EIF2B1	0.0706932	0.752816
GSE68465	EIF2B1	-0.332717	2.67887e-05	***
GSE68571	EIF2B1	0.0175042	0.825832
GSE81089	EIF2B1	0.222147	0.000837224	***
GSE87340	EIF2B1	0.0795336	0.186956
TCGA.LUAD	EIF2B1	0.398523	1.53742e-17	***
GSE10799	DNMT3A	1.7246	0.00851732	**
GSE18842	DNMT3A	1.27211	9.05171e-23	***
GSE19188	DNMT3A	0.356015	1.98328e-10	***
GSE27262	DNMT3A	0.507084	0.000262076	***
GSE30219	DNMT3A	1.12104	5.11562e-08	***
GSE31210	DNMT3A	0.209613	0.0024378	**
GSE31547	DNMT3A	1.41002	0.000250209	***
GSE33356	DNMT3A	0.749252	4.76289e-12	***
GSE63459	DNMT3A	0.00628788	0.792984
GSE68465	DNMT3A	-0.371562	0.146237
GSE68571	DNMT3A
GSE81089	DNMT3A	0.754221	1.0394e-07	***
GSE87340	DNMT3A	0.385216	0.00319708	**
TCGA.LUAD	DNMT3A	1.16607	4.64135e-28	***
GSE10799	BHMT2	0.180058	0.113167
GSE18842	BHMT2	0.0308459	2.36821e-05	***
GSE19188	BHMT2	0.227643	0.790233
GSE27262	BHMT2	0.853118	0.116639
GSE30219	BHMT2	0.141089	0.0187763	*
GSE31210	BHMT2	0.0425761	0.585157
GSE31547	BHMT2	0.256505	0.821523
GSE33356	BHMT2	0.486063	0.429574
GSE63459	BHMT2	0.231848	0.0562158
GSE68465	BHMT2	0.915396	0.0698808
GSE68571	BHMT2
GSE81089	BHMT2
GSE87340	BHMT2	0.465206	0.366378
TCGA.LUAD	BHMT2	0.947077	0.258479
GSE10799	SUV39H2	1.64299	0.0227038	*
GSE18842	SUV39H2	1.6805	2.24199e-22	***
GSE19188	SUV39H2	1.07237	5.96668e-20	***
GSE27262	SUV39H2	0.788581	1.8912e-09	***
GSE30219	SUV39H2	1.70558	1.87654e-09	***
GSE31210	SUV39H2	0.376991	3.58795e-05	***
GSE31547	SUV39H2	-0.0407469	0.960893
GSE33356	SUV39H2	0.693524	1.91978e-09	***
GSE63459	SUV39H2	0.0669744	0.293806
GSE68465	SUV39H2	-0.938967	0.000448865	***
GSE68571	SUV39H2
GSE81089	SUV39H2	1.38923	2.64209e-12	***
GSE87340	SUV39H2	0.354425	5.6538e-06	***
TCGA.LUAD	SUV39H2	1.23145	2.07974e-29	***
GSE10799	NNMT	-0.551602	0.0340737	*
GSE18842	NNMT	-0.137364	0.18104
GSE19188	NNMT	-0.70264	0.00143011	**
GSE27262	NNMT	-0.0592923	0.616886
GSE30219	NNMT	0.10198	0.592852
GSE31210	NNMT	0.0794598	0.596476
GSE31547	NNMT	-0.591778	0.0236153	*
GSE33356	NNMT	-0.210019	0.135375
GSE63459	NNMT	-0.180011	0.34382
GSE68465	NNMT
GSE68571	NNMT
GSE81089	NNMT	0.0155484	0.706409
GSE87340	NNMT	0.110885	0.636669
TCGA.LUAD	NNMT	-0.28748	0.0730317
GSE10799	MSRA	-0.565985	0.370883
GSE18842	MSRA	-1.24468	7.55279e-20	***
GSE19188	MSRA	-0.75147	1.15639e-15	***
GSE27262	MSRA	-0.127952	0.0542201
GSE30219	MSRA	-0.855887	5.4822e-08	***
GSE31210	MSRA	-0.320086	4.63089e-05	***
GSE31547	MSRA	-0.340224	0.00467113	**
GSE33356	MSRA	-0.250811	0.000231484	***
GSE63459	MSRA	-0.467947	7.79884e-07	***
GSE68465	MSRA	0.444827	3.81417e-05	***
GSE68571	MSRA
GSE81089	MSRA
GSE87340	MSRA	-0.321225	0.000250716	***
TCGA.LUAD	MSRA	-0.868663	8.18498e-19	***
GSE10799	PRMT3	1.13188	0.0144479	*
GSE18842	PRMT3	1.20716	1.08645e-17	***
GSE19188	PRMT3	0.823686	2.13299e-14	***
GSE27262	PRMT3	0.753043	2.99567e-07	***
GSE30219	PRMT3	1.05608	9.32659e-08	***
GSE31210	PRMT3	0.406376	3.90662e-07	***
GSE31547	PRMT3	0.271853	0.111446
GSE33356	PRMT3	0.57419	7.1815e-09	***
GSE63459	PRMT3
GSE68465	PRMT3	-1.07828	1.96628e-11	***
GSE68571	PRMT3
GSE81089	PRMT3	0.70342	7.20726e-10	***
GSE87340	PRMT3	0.459891	2.13236e-08	***
TCGA.LUAD	PRMT3	0.845691	3.68324e-27	***
GSE10799	CARM1	1.3542	0.00854634	**
GSE18842	CARM1	1.00073	1.57136e-17	***
GSE19188	CARM1	0.603122	3.29366e-08	***
GSE27262	CARM1	0.38274	0.000399266	***
GSE30219	CARM1	0.427747	0.00200428	**
GSE31210	CARM1	0.353445	4.31545e-05	***
GSE31547	CARM1	0.485384	1.00627e-05	***
GSE33356	CARM1	0.337521	0.000165951	***
GSE63459	CARM1	0.435413	0.000499609	***
GSE68465	CARM1	-1.11736	1.80296e-12	***
GSE68571	CARM1
GSE81089	CARM1	0.629612	0.000624134	***
GSE87340	CARM1	0.320779	0.000140908	***
TCGA.LUAD	CARM1	0.525405	1.92873e-19	***
GSE10799	ADI1	0.135477	0.957688
GSE18842	ADI1	0.0924851	0.767049
GSE19188	ADI1	-0.010082	0.589745
GSE27262	ADI1	0.144524	0.271363
GSE30219	ADI1	0.0779143	0.514517
GSE31210	ADI1	0.24649	0.0112157	*
GSE31547	ADI1	0.402485	0.00129525	**
GSE33356	ADI1	0.172698	0.00791103	**
GSE63459	ADI1	0.00628314	0.595121
GSE68465	ADI1	0.81757	1.08695e-09	***
GSE68571	ADI1
GSE81089	ADI1	-0.0455215	0.491437
GSE87340	ADI1	0.4556	0.000208462	***
TCGA.LUAD	ADI1	-0.00831399	0.425797
GSE10799	PRMT7	0.46256	0.0826988
GSE18842	PRMT7	0.220098	0.0455272	*
GSE19188	PRMT7	0.0142607	0.499165
GSE27262	PRMT7	0.310266	0.022262	*
GSE30219	PRMT7	0.0619076	0.728807
GSE31210	PRMT7	0.0827241	0.483955
GSE31547	PRMT7	0.199663	0.485589
GSE33356	PRMT7	0.269678	0.000106135	***
GSE63459	PRMT7	0.103303	0.0248426	*
GSE68465	PRMT7	-2.04122	8.53234e-10	***
GSE68571	PRMT7
GSE81089	PRMT7	0.137255	0.43523
GSE87340	PRMT7	0.282841	0.000508518	***
TCGA.LUAD	PRMT7	0.372637	1.33061e-09	***
GSE10799	MSRB2	-0.232851	0.712074
GSE18842	MSRB2	-0.358667	0.00465595	**
GSE19188	MSRB2	-0.457372	1.53087e-08	***
GSE27262	MSRB2	-0.316454	0.00397247	**
GSE30219	MSRB2	-0.252246	0.0766361
GSE31210	MSRB2	-0.360409	2.36569e-06	***
GSE31547	MSRB2	0.0108281	0.791136
GSE33356	MSRB2	0.103673	0.151142
GSE63459	MSRB2	0.0724148	0.193051
GSE68465	MSRB2	0.313378	7.42367e-05	***
GSE68571	MSRB2
GSE81089	MSRB2	0.0157404	0.941782
GSE87340	MSRB2	0.0670284	0.37562
TCGA.LUAD	MSRB2	0.10316	0.170214
GSE10799	DNMT3B	1.35945	0.0218494	*
GSE18842	DNMT3B	1.03541	3.86276e-16	***
GSE19188	DNMT3B	1.69664	1.72791e-20	***
GSE27262	DNMT3B	0.828607	2.99567e-07	***
GSE30219	DNMT3B	1.15132	1.17688e-08	***
GSE31210	DNMT3B	0.422899	0.000631252	***
GSE31547	DNMT3B	1.33159	0.000354667	***
GSE33356	DNMT3B	0.564286	1.60635e-09	***
GSE63459	DNMT3B	0.0247254	0.250849
GSE68465	DNMT3B	-2.76848	1.55533e-13	***
GSE68571	DNMT3B
GSE81089	DNMT3B	1.43973	2.83521e-10	***
GSE87340	DNMT3B	0.318383	0.0036022	**
TCGA.LUAD	DNMT3B	1.74085	2.3919e-23	***
GSE10799	MTHFD2L	1.0431	0.198337
GSE18842	MTHFD2L	0.0891573	0.672517
GSE19188	MTHFD2L	-0.104622	0.260528
GSE27262	MTHFD2L	0.102799	0.847517
GSE30219	MTHFD2L	0.392807	0.0651085
GSE31210	MTHFD2L	-0.420986	0.00010442	***
GSE31547	MTHFD2L	0.16359	0.340086
GSE33356	MTHFD2L	0.0918737	0.835759
GSE63459	MTHFD2L	0.0245587	0.813284
GSE68465	MTHFD2L	-0.161726	0.383141
GSE68571	MTHFD2L
GSE81089	MTHFD2L	0.289591	0.0708333
GSE87340	MTHFD2L	0.0279469	0.475595
TCGA.LUAD	MTHFD2L	0.146951	0.100774
GSE10799	SUV39H1	1.22546	0.0144479	*
GSE18842	SUV39H1	0.574563	1.03225e-10	***
GSE19188	SUV39H1	0.366774	0.000456884	***
GSE27262	SUV39H1	0.232585	0.146715
GSE30219	SUV39H1	0.510109	4.40677e-05	***
GSE31210	SUV39H1	-0.127883	0.209835
GSE31547	SUV39H1	0.192989	0.05293
GSE33356	SUV39H1	0.244132	0.000652037	***
GSE63459	SUV39H1	0.427106	5.10806e-06	***
GSE68465	SUV39H1	-0.739301	6.00728e-11	***
GSE68571	SUV39H1
GSE81089	SUV39H1	0.658315	7.17055e-05	***
GSE87340	SUV39H1	0.180755	0.000674701	***
TCGA.LUAD	SUV39H1	0.564336	7.73167e-14	***
GSE10799	AHCYL2	-0.721815	0.955401
GSE18842	AHCYL2	-1.3367	2.07569e-13	***
GSE19188	AHCYL2	-0.89751	1.92876e-11	***
GSE27262	AHCYL2	-0.332457	0.0567567
GSE30219	AHCYL2	-1.13268	8.5701e-05	***
GSE31210	AHCYL2	0.00780554	0.819759
GSE31547	AHCYL2	-0.0931736	0.510575
GSE33356	AHCYL2	-0.689897	0.000107279	***
GSE63459	AHCYL2
GSE68465	AHCYL2	1.4586	2.02669e-10	***
GSE68571	AHCYL2
GSE81089	AHCYL2	-1.42606	2.06472e-06	***
GSE87340	AHCYL2	-0.180828	0.711971
TCGA.LUAD	AHCYL2	-0.790518	3.35228e-06	***
GSE10799	ENOPH1	0.763099	0.25387
GSE18842	ENOPH1	0.787477	2.57136e-12	***
GSE19188	ENOPH1	0.488363	6.28309e-12	***
GSE27262	ENOPH1	0.279283	0.00483323	**
GSE30219	ENOPH1	0.752504	8.27848e-08	***
GSE31210	ENOPH1	0.214969	0.000210288	***
GSE31547	ENOPH1	0.418491	0.00533039	**
GSE33356	ENOPH1	0.285604	2.53058e-05	***
GSE63459	ENOPH1
GSE68465	ENOPH1	-0.693545	7.15799e-08	***
GSE68571	ENOPH1
GSE81089	ENOPH1	0.448023	9.73657e-07	***
GSE87340	ENOPH1	0.295994	2.15712e-05	***
TCGA.LUAD	ENOPH1	0.523815	7.89652e-18	***
GSE10799	SLC38A7	1.27732	0.00828698	**
GSE18842	SLC38A7	0.445819	9.35167e-10	***
GSE19188	SLC38A7	0.351102	0.000111404	***
GSE27262	SLC38A7	0.348706	5.45796e-06	***
GSE30219	SLC38A7	0.185148	0.0726215
GSE31210	SLC38A7	0.481428	2.57536e-07	***
GSE31547	SLC38A7	0.3641	0.000273283	***
GSE33356	SLC38A7	0.468865	5.24354e-08	***
GSE63459	SLC38A7
GSE68465	SLC38A7	0.399836	5.82665e-06	***
GSE68571	SLC38A7
GSE81089	SLC38A7	0.510886	0.000417878	***
GSE87340	SLC38A7	0.362193	0.000380547	***
TCGA.LUAD	SLC38A7	0.774859	2.65432e-21	***
GSE10799	CHDH	0.094491	0.736759
GSE18842	CHDH	-0.42543	1.93707e-07	***
GSE19188	CHDH	0.0116145	0.914122
GSE27262	CHDH	0.461603	0.00424289	**
GSE30219	CHDH	0.0525866	0.0476905	*
GSE31210	CHDH	0.334979	0.108534
GSE31547	CHDH
GSE33356	CHDH	0.41122	1.07757e-05	***
GSE63459	CHDH	-0.00125852	0.838826
GSE68465	CHDH
GSE68571	CHDH
GSE81089	CHDH	-0.594618	0.0386478	*
GSE87340	CHDH	0.730632	2.19688e-09	***
TCGA.LUAD	CHDH	0.100993	0.169315
GSE10799	MTFMT	0.0545397	0.736871
GSE18842	MTFMT	0.36141	0.00208542	**
GSE19188	MTFMT	0.234851	0.00302061	**
GSE27262	MTFMT	0.112175	0.271363
GSE30219	MTFMT	0.40425	0.000634835	***
GSE31210	MTFMT	0.195651	0.0142592	*
GSE31547	MTFMT
GSE33356	MTFMT	0.0720283	0.307321
GSE63459	MTFMT	0.0552443	0.106522
GSE68465	MTFMT
GSE68571	MTFMT
GSE81089	MTFMT	-0.0381672	0.787884
GSE87340	MTFMT	0.030522	0.576583
TCGA.LUAD	MTFMT	0.0100508	0.815235
GSE10799	PRMT6	0.151228	0.875129
GSE18842	PRMT6	0.539155	1.63529e-05	***
GSE19188	PRMT6	0.434563	1.11935e-05	***
GSE27262	PRMT6	0.365944	0.0915541
GSE30219	PRMT6	0.650713	0.000586351	***
GSE31210	PRMT6	0.0875447	0.281488
GSE31547	PRMT6
GSE33356	PRMT6	0.368539	0.00426476	**
GSE63459	PRMT6	0.304565	0.000900584	***
GSE68465	PRMT6
GSE68571	PRMT6
GSE81089	PRMT6	0.221221	0.0477584	*
GSE87340	PRMT6	0.207467	0.0530679
TCGA.LUAD	PRMT6	0.0417181	0.0652083
GSE10799	MSRB3	-3.62791	0.00206398	**
GSE18842	MSRB3	-1.38716	1.25098e-11	***
GSE19188	MSRB3	-0.626958	4.74786e-09	***
GSE27262	MSRB3	-1.17884	1.1075e-13	***
GSE30219	MSRB3	-1.67591	2.14305e-09	***
GSE31210	MSRB3	-0.758299	9.16274e-09	***
GSE31547	MSRB3
GSE33356	MSRB3	-1.15331	3.10604e-12	***
GSE63459	MSRB3	-0.843548	1.58354e-10	***
GSE68465	MSRB3
GSE68571	MSRB3
GSE81089	MSRB3	-1.21726	1.60208e-08	***
GSE87340	MSRB3	-1.35736	6.74702e-10	***
TCGA.LUAD	MSRB3	-2.11832	1.03373e-31	***
GSE10799	IL4I1	1.32742	0.0205885	*
GSE18842	IL4I1	1.20129	9.32019e-12	***
GSE19188	IL4I1	1.33731	1.19015e-07	***
GSE27262	IL4I1	1.20056	2.29419e-09	***
GSE30219	IL4I1	0.865582	0.00186348	**
GSE31210	IL4I1	1.6925	4.49658e-08	***
GSE31547	IL4I1
GSE33356	IL4I1	0.835384	5.58898e-09	***
GSE63459	IL4I1	0.231422	5.31113e-05	***
GSE68465	IL4I1
GSE68571	IL4I1
GSE81089	IL4I1	1.38951	0.000316316	***
GSE87340	IL4I1	0.82653	0.000888987	***
TCGA.LUAD	IL4I1	1.77172	2.97138e-19	***
GSE10799	APIP	-0.527412	0.401529
GSE18842	APIP	-0.706645	3.77932e-12	***
GSE19188	APIP
GSE27262	APIP	-0.0394842	0.658147
GSE30219	APIP	-0.144345	0.0607471
GSE31210	APIP
GSE31547	APIP
GSE33356	APIP	-0.164422	0.0109092	*
GSE63459	APIP	-0.204277	0.0178616	*
GSE68465	APIP	-0.741331	4.85186e-09	***
GSE68571	APIP
GSE81089	APIP	-0.65779	2.81845e-07	***
GSE87340	APIP	-0.177704	0.0430579	*
TCGA.LUAD	APIP	-0.628694	4.73766e-16	***
GSE10799	SMS	0.757346	0.210526
GSE18842	SMS	0.709145	4.04723e-06	***
GSE19188	SMS
GSE27262	SMS	0.465935	0.00149956	**
GSE30219	SMS	0.881421	1.49147e-06	***
GSE31210	SMS
GSE31547	SMS
GSE33356	SMS	0.406819	3.14076e-07	***
GSE63459	SMS	0.259951	0.00772567	**
GSE68465	SMS	-1.46242	3.0158e-12	***
GSE68571	SMS	0.349534	0.191679
GSE81089	SMS	0.754454	3.36719e-06	***
GSE87340	SMS	0.532848	2.15712e-05	***
TCGA.LUAD	SMS	0.631732	1.07368e-15	***
GSE10799	SLC43A2	-0.0879211	0.614728
GSE18842	SLC43A2	-0.219333	0.00215459	**
GSE19188	SLC43A2	-0.172722	0.06209
GSE27262	SLC43A2	-0.236867	0.0121001	*
GSE30219	SLC43A2	-0.416891	0.000191001	***
GSE31210	SLC43A2	-0.222831	0.00597759	**
GSE31547	SLC43A2
GSE33356	SLC43A2	-0.228434	0.00444439	**
GSE63459	SLC43A2	-0.101276	0.176523
GSE68465	SLC43A2
GSE68571	SLC43A2
GSE81089	SLC43A2	-0.754216	9.85782e-06	***
GSE87340	SLC43A2	-0.377689	0.000178494	***
TCGA.LUAD	SLC43A2	-0.567673	6.57195e-12	***
GSE10799	SETD7	-0.431831	0.79257
GSE18842	SETD7	-0.00656523	0.984246
GSE19188	SETD7	-0.333208	0.00056617	***
GSE27262	SETD7	-0.00422712	0.279922
GSE30219	SETD7	-0.203112	0.222887
GSE31210	SETD7	-0.054105	0.178361
GSE31547	SETD7
GSE33356	SETD7	0.0414307	0.962324
GSE63459	SETD7
GSE68465	SETD7
GSE68571	SETD7
GSE81089	SETD7	-0.0886774	0.461687
GSE87340	SETD7	-0.0560307	0.244784
TCGA.LUAD	SETD7	-0.0590001	0.911897
GSE10799	MRI1	0.369608	0.240214
GSE18842	MRI1	0.042979	0.645225
GSE19188	MRI1	0.369867	5.69869e-08	***
GSE27262	MRI1	0.154447	0.00848625	**
GSE30219	MRI1	-0.100907	0.286969
GSE31210	MRI1	0.111331	0.092914
GSE31547	MRI1
GSE33356	MRI1	0.125638	0.0689643
GSE63459	MRI1
GSE68465	MRI1
GSE68571	MRI1
GSE81089	MRI1	0.382239	0.218702
GSE87340	MRI1	-0.0202445	0.965769
TCGA.LUAD	MRI1	0.276827	8.26414e-05	***
GSE10799	MSRB1	0.748651	0.109391
GSE18842	MSRB1	0.0576134	0.445498
GSE19188	MSRB1
GSE27262	MSRB1	0.236172	0.0915541
GSE30219	MSRB1	0.113011	0.717261
GSE31210	MSRB1
GSE31547	MSRB1
GSE33356	MSRB1	0.231157	0.00506638	**
GSE63459	MSRB1
GSE68465	MSRB1	0.177697	0.285224
GSE68571	MSRB1
GSE81089	MSRB1	0.398713	0.217266
GSE87340	MSRB1
TCGA.LUAD	MSRB1
GSE10799	MRM2
GSE18842	MRM2
GSE19188	MRM2
GSE27262	MRM2
GSE30219	MRM2
GSE31210	MRM2
GSE31547	MRM2
GSE33356	MRM2
GSE63459	MRM2
GSE68465	MRM2
GSE68571	MRM2
GSE81089	MRM2	0.366474	4.46453e-05	***
GSE87340	MRM2
TCGA.LUAD	MRM2
GSE10799	KMT5A
GSE18842	KMT5A
GSE19188	KMT5A
GSE27262	KMT5A
GSE30219	KMT5A
GSE31210	KMT5A
GSE31547	KMT5A
GSE33356	KMT5A
GSE63459	KMT5A
GSE68465	KMT5A
GSE68571	KMT5A
GSE81089	KMT5A	0.222859	0.0945213
GSE87340	KMT5A
TCGA.LUAD	KMT5A
