# Supplementary material for: A novel methionine metabolism-related signature predicts prognosis and immunotherapy response in lung adenocarcinoma
Source: Aging (Albany NY). 2023 May 2;15(9):3498–523. doi: 10.18632/aging.204687 (PMC10449287; doi:10.18632/aging.204687)
Supplement: Supplementary Table 3 [file aging-15-204687-s004.xlsx]

## Sheet: Table S3
Supplementary Table 3. Association between MRGs expression and patient prognosis across 30 LUAD datasets as determined by the Log-rank test.
Gene	GSE	HR	HR.95L	HR.95H	hratio.se	zscore	pvalue	weight
DNMT1	ca00153	2.87367	1.13435	7.27996	0.474261	2.22576	0.0260301	86
DNMT1	ca00182	1.27867	0.957186	1.70814	0.147748	1.6638	0.0961525	442
DNMT1	ca00191	0.669003	0.378132	1.18362	0.291101	-1.38085	0.167325	125
DNMT1	GSE10245	0.348029	0.149948	0.807776	0.4296	-2.45687	0.0140154	58
DNMT1	GSE1037	4.22739	1.72117	10.3829	0.458466	3.14436	0.0016645	61
DNMT1	GSE11117	4.35357	1.76234	10.7547	0.461412	3.18803	0.00143245	41
DNMT1	GSE11969	2.72386	1.24973	5.93681	0.397518	2.52076	0.01171	149
DNMT1	GSE13213	2.34819	1.19832	4.60142	0.343231	2.48708	0.0128795	117
DNMT1	GSE14814	0.617564	0.317946	1.19953	0.338732	-1.42287	0.154773	90
DNMT1	GSE19188	0.739174	0.385735	1.41646	0.331834	-0.910765	0.362419	82
DNMT1	GSE29013	3.07616	1.14173	8.28811	0.505692	2.22207	0.0262786	55
DNMT1	GSE30219	3.26771	2.14348	4.9816	0.215137	5.50388	3.71515e-08	293
DNMT1	GSE31210	2.31041	1.13037	4.72236	0.364743	2.29593	0.0216798	226
DNMT1	GSE3141	0.57399	0.25935	1.27035	0.405331	-1.3696	0.17081	111
DNMT1	GSE31547	2.70586	0.724741	10.1025	0.672135	1.48098	0.138611	30
DNMT1	GSE36471	0.676193	0.406308	1.12535	0.259887	-1.50556	0.132179	115
DNMT1	GSE37745	0.803204	0.575774	1.12047	0.169847	-1.29026	0.196959	196
DNMT1	GSE41271	2.29964	1.3593	3.89048	0.268261	3.10425	0.0019076	274
DNMT1	GSE42127	2.45373	1.21044	4.97408	0.360532	2.48968	0.0127857	176
DNMT1	GSE50081	1.4377	0.909979	2.27145	0.233359	1.55572	0.119774	181
DNMT1	GSE5843	0.489961	0.207169	1.15877	0.439188	-1.62443	0.104284	48
DNMT1	GSE63459	0.249328	0.0659755	0.942233	0.678321	-2.04768	0.040591	65
DNMT1	GSE68465	1.33216	0.979778	1.81128	0.156753	1.82964	0.0673039	442
DNMT1	GSE68571	0.345256	0.136913	0.870639	0.471917	-2.25351	0.0242271	64
DNMT1	GSE72094	0.560476	0.382972	0.820253	0.194302	-2.97973	0.00288503	398
DNMT1	GSE87340	2.24393	0.703062	7.16185	0.592123	1.36497	0.172263	54
DNMT1	GSE8894	2.30145	1.34732	3.93126	0.273179	3.05126	0.00227885	138
DNMT1	OncoSG.LUAD	0.581802	0.278012	1.21755	0.376775	-1.43753	0.150568	169
DNMT1	Roepman.LUAD	0.659706	0.378539	1.14971	0.28341	-1.4677	0.142185	171
DNMT1	TCGA.LUAD	1.20234	0.914461	1.58085	0.139641	1.31961	0.186966	567
COMT	ca00153	3.52352	1.48925	8.33655	0.43939	2.86639	0.00415187	86
COMT	ca00182	0.740598	0.472705	1.16031	0.229079	-1.31089	0.189896	442
COMT	ca00191	0.729033	0.382595	1.38917	0.328957	-0.960722	0.336692	125
COMT	GSE10245	0.276736	0.104922	0.729902	0.494828	-2.59624	0.00942511	58
COMT	GSE1037	1.59521	0.577881	4.40352	0.518069	0.90144	0.367354	50
COMT	GSE11117	2.06355	0.81	5.2571	0.477127	1.51832	0.128935	41
COMT	GSE11969	0.620264	0.374123	1.02835	0.257944	-1.8516	0.0640832	149
COMT	GSE13213	0.182341	0.044271	0.751016	0.722232	-2.35641	0.0184524	117
COMT	GSE14814	0.741307	0.390779	1.40626	0.326675	-0.916325	0.359497	90
COMT	GSE19188	1.47242	0.825133	2.6275	0.295475	1.30945	0.190382	82
COMT	GSE29013	0.2958	0.116343	0.752068	0.476102	-2.55843	0.0105147	55
COMT	GSE30219	1.36348	1.03191	1.80161	0.142164	2.18089	0.0291916	293
COMT	GSE31210	2.22494	0.969599	5.10555	0.423784	1.88711	0.059145	226
COMT	GSE3141	1.54701	0.916086	2.61245	0.267335	1.63212	0.102655	111
COMT	GSE31547	4.63986	1.15013	18.7181	0.711649	2.15652	0.0310434	30
COMT	GSE36471	1.98748	1.09239	3.61601	0.305363	2.24935	0.0244903	115
COMT	GSE37745	0.677063	0.392929	1.16666	0.277625	-1.40474	0.160099	196
COMT	GSE41271	0.727823	0.48416	1.09411	0.207984	-1.52751	0.126634	274
COMT	GSE42127	0.635979	0.383417	1.05491	0.25819	-1.75293	0.079614	176
COMT	GSE50081	0.45146	0.261896	0.778233	0.277831	-2.86242	0.00420422	181
COMT	GSE5843	3.48204	1.29457	9.36571	0.504824	2.47139	0.013459	47
COMT	GSE63459	0.159947	0.0461116	0.554804	0.63459	-2.88834	0.00387276	65
COMT	GSE68465	0.669285	0.434943	1.02989	0.219899	-1.82604	0.0678439	442
COMT	GSE68571	3.09223	1.09654	8.72005	0.528954	2.1342	0.0328264	64
COMT	GSE72094	0.552651	0.361718	0.844369	0.21626	-2.7422	0.00610295	398
COMT	GSE87340	0.3877	0.0867017	1.73366	0.764177	-1.23993	0.215003	54
COMT	GSE8894	0.638723	0.3771	1.08185	0.268862	-1.66734	0.0954472	138
COMT	OncoSG.LUAD	0.479758	0.260171	0.884678	0.312221	-2.35241	0.018652	169
COMT	Roepman.LUAD	0.502867	0.225579	1.121	0.409015	-1.6807	0.0928219	171
COMT	TCGA.LUAD	1.33579	0.997246	1.78925	0.149124	1.94147	0.0522012	567
AMD1	ca00153	0.426999	0.144738	1.25971	0.551979	-1.54168	0.123152	86
AMD1	ca00182	1.50166	1.13534	1.98618	0.142675	2.84964	0.00437693	442
AMD1	ca00191	0.597698	0.373493	0.956492	0.239896	-2.14539	0.0319218	125
AMD1	GSE10245	4.13015e-09	0	Inf	7697.56	-0.00250793	0.997999	58
AMD1	GSE1037	0.47269	0.187966	1.18871	0.470509	-1.59256	0.111258	61
AMD1	GSE11117	0.411926	0.172745	0.982275	0.443389	-2.0003	0.0454679	41
AMD1	GSE11969	1.56889	0.994151	2.4759	0.232777	1.93476	0.0530191	149
AMD1	GSE13213	0.442512	0.214088	0.914655	0.370456	-2.20077	0.0277522	117
AMD1	GSE14814	0.630612	0.288856	1.37671	0.398355	-1.15742	0.247101	90
AMD1	GSE19188	0.33301	0.144616	0.766828	0.425564	-2.58383	0.00977111	82
AMD1	GSE29013	2.27597	0.896438	5.77848	0.475383	1.72999	0.0836321	55
AMD1	GSE30219	1.81793	1.23624	2.67332	0.19675	3.03786	0.00238266	293
AMD1	GSE31210	1.91073	0.977972	3.73311	0.341719	1.89478	0.0581212	226
AMD1	GSE3141	2.00243	0.723557	5.54168	0.519365	1.33694	0.181242	111
AMD1	GSE31547	0.209266	0.0261273	1.67611	1.06156	-1.47344	0.140632	30
AMD1	GSE36471	1.63632	0.9181	2.9164	0.294852	1.67016	0.0948872	115
AMD1	GSE37745	1.24472	0.895303	1.73052	0.168118	1.30214	0.192869	196
AMD1	GSE41271	1.2736	0.892585	1.81727	0.181373	1.33344	0.182386	274
AMD1	GSE42127	2.12828	1.07782	4.20255	0.347138	2.17583	0.0295678	176
AMD1	GSE50081	0.48881	0.210218	1.13661	0.430533	-1.66255	0.0964034	181
AMD1	GSE5843	8.00969e+07	0	Inf	5240.36	0.0034728	0.997229	48
AMD1	GSE63459	2.62568e+08	0	Inf	9417.04	0.00205861	0.998357	65
AMD1	GSE68465	1.67905	1.27379	2.21324	0.140936	3.67703	0.000235969	442
AMD1	GSE68571	3.1255	1.28569	7.59809	0.453224	2.51442	0.0119228	64
AMD1	GSE72094	0.550321	0.286659	1.05649	0.332766	-1.79481	0.0726835	398
AMD1	GSE87340	0.204718	0.0706852	0.592902	0.542559	-2.92341	0.00346223	54
AMD1	GSE8894	2.48643	0.863702	7.15795	0.539487	1.68836	0.0913423	138
AMD1	OncoSG.LUAD	1.88835	0.978021	3.646	0.335684	1.89376	0.0582569	169
AMD1	Roepman.LUAD	0.559925	0.31394	0.99865	0.29521	-1.96454	0.0494674	171
AMD1	TCGA.LUAD	1.21061	0.916876	1.59845	0.141793	1.34793	0.177682	567
MTR	ca00153	0.565657	0.224283	1.42663	0.471988	-1.20716	0.227369	86
MTR	ca00182	0.735703	0.513551	1.05395	0.18341	-1.67345	0.0942381	442
MTR	ca00191	1.78399	0.911394	3.49204	0.342676	1.68921	0.0911785	125
MTR	GSE10245	0.370479	0.109245	1.25639	0.623074	-1.59364	0.111016	58
MTR	GSE1037	3.08969	1.23132	7.75282	0.46939	2.40327	0.0162492	61
MTR	GSE11117	0.269527	0.094582	0.76806	0.534296	-2.45386	0.0141331	41
MTR	GSE11969	0.488798	0.300044	0.796295	0.248995	-2.87478	0.00404305	149
MTR	GSE13213	1.6259	0.914787	2.8898	0.293437	1.65644	0.0976322	117
MTR	GSE14814	1.63342	0.843276	3.16393	0.337321	1.45463	0.145773	90
MTR	GSE19188	2.14803	1.21945	3.78369	0.288858	2.6468	0.00812563	82
MTR	GSE29013	3.27687	0.736643	14.5768	0.761515	1.55859	0.119094	55
MTR	GSE30219	2.00884	1.16504	3.46379	0.277966	2.50951	0.0120898	293
MTR	GSE31210	0.296908	0.152829	0.576815	0.338833	-3.58387	0.000338535	226
MTR	GSE3141	0.463452	0.265104	0.810204	0.284996	-2.69846	0.00696608	111
MTR	GSE31547	2.62593e+08	0	Inf	11040.3	0.00175594	0.998599	30
MTR	GSE36471	0.519479	0.314901	0.856963	0.255397	-2.56436	0.0103366	115
MTR	GSE37745	0.791574	0.570849	1.09765	0.166788	-1.40137	0.161104	196
MTR	GSE41271	0.601234	0.360114	1.0038	0.261516	-1.94547	0.0517187	274
MTR	GSE42127	0.451485	0.163719	1.24505	0.517555	-1.53648	0.124421	176
MTR	GSE50081	0.459091	0.280025	0.752663	0.252234	-3.08645	0.00202562	181
MTR	GSE5843	4.26863e-09	0	Inf	7538.68	-0.00255641	0.99796	48
MTR	GSE63459	4.717	1.23611	18.0001	0.683279	2.27019	0.0231961	65
MTR	GSE68465	0.73559	0.52155	1.03747	0.175446	-1.7503	0.0800672	442
MTR	GSE68571	0.481987	0.198811	1.1685	0.451825	-1.61531	0.106243	64
MTR	GSE72094	0.516075	0.353757	0.752871	0.192678	-3.43321	0.000596488	398
MTR	GSE87340	0.302939	0.100784	0.910581	0.561516	-2.12678	0.033438	54
MTR	GSE8894	1.46698	0.756024	2.8465	0.338213	1.13302	0.257204	138
MTR	OncoSG.LUAD	1.02491e-08	0	Inf	3124.93	-0.00588688	0.995303	169
MTR	Roepman.LUAD	0.458664	0.250515	0.839762	0.308577	-2.52591	0.0115401	171
MTR	TCGA.LUAD	0.651124	0.46503	0.91169	0.171737	-2.49832	0.0124784	567
SRM	ca00153	2.86767	1.05569	7.78969	0.509858	2.06626	0.0388039	86
SRM	ca00182	0.518871	0.376039	0.715957	0.16427	-3.99402	6.49616e-05	442
SRM	ca00191	1.5642	0.960139	2.5483	0.24901	1.79661	0.0723979	125
SRM	GSE10245	0.485788	0.179035	1.31812	0.50929	-1.41763	0.156299	58
SRM	GSE1037	0.284942	0.0831689	0.976233	0.628284	-1.99825	0.0456896	61
SRM	GSE11117	1.97312	0.867704	4.48681	0.419152	1.62141	0.104929	41
SRM	GSE11969	1.67896	1.05193	2.67974	0.238549	2.17218	0.0298418	149
SRM	GSE13213	2.66502	1.38652	5.12244	0.333383	2.9402	0.00328	117
SRM	GSE14814	1.57644	0.834136	2.97931	0.324764	1.40153	0.161056	90
SRM	GSE19188	1.76403	0.791217	3.93293	0.409081	1.3875	0.165289	82
SRM	GSE29013	2.18691	0.615139	7.77483	0.647154	1.20913	0.226614	55
SRM	GSE30219	2.96408	1.77631	4.94608	0.261244	4.1592	3.19363e-05	293
SRM	GSE31210	1.68688	0.8386	3.39323	0.356589	1.46634	0.142556	226
SRM	GSE3141	2.51636	1.14141	5.54756	0.403347	2.28789	0.0221441	111
SRM	GSE31547	4.81115	0.967582	23.9227	0.818327	1.91969	0.0548967	30
SRM	GSE36471	1.84912	0.965284	3.54222	0.331661	1.85343	0.0638207	115
SRM	GSE37745	1.52617	1.08198	2.15273	0.1755	2.40891	0.0160001	196
SRM	GSE41271	1.79116	1.24413	2.57873	0.185938	3.13473	0.00172014	274
SRM	GSE42127	1.98398	1.11156	3.54113	0.295588	2.31777	0.0204617	176
SRM	GSE50081	2.14134	1.15208	3.98007	0.316264	2.40758	0.0160585	181
SRM	GSE5843	0.216779	0.0291776	1.61058	1.02322	-1.49418	0.135128	48
SRM	GSE63459	3.9901	1.0569	15.0637	0.677805	2.04161	0.0411899	65
SRM	GSE68465	0.620385	0.458261	0.839865	0.154545	-3.08918	0.00200712	442
SRM	GSE68571	3.69679	1.19519	11.4344	0.576113	2.26946	0.0232403	64
SRM	GSE72094	1.84141	0.95999	3.53211	0.332335	1.8371	0.0661953	398
SRM	GSE87340	4.95562	0.647655	37.9186	1.03824	1.54157	0.123179	54
SRM	GSE8894	2.16623	1.25042	3.75278	0.280367	2.75705	0.00583248	138
SRM	OncoSG.LUAD	3.22092	1.48832	6.97051	0.393895	2.96949	0.00298291	169
SRM	Roepman.LUAD	1.82425	1.0428	3.19128	0.285339	2.10685	0.0351306	171
SRM	TCGA.LUAD	1.41862	1.07711	1.86841	0.140514	2.48863	0.0128236	567
SLC7A5	ca00153	6.01955	2.39388	15.1365	0.470467	3.81539	0.000135969	86
SLC7A5	ca00182	1.5687	1.12927	2.17911	0.167693	2.68493	0.00725454	442
SLC7A5	ca00191	1.75479	1.03562	2.97337	0.269061	2.09004	0.0366145	125
SLC7A5	GSE10245	0.344977	0.134671	0.883702	0.479928	-2.21758	0.0265837	58
SLC7A5	GSE1037	4.13463	1.46544	11.6656	0.529215	2.68208	0.00731656	61
SLC7A5	GSE11117	4.29399	1.64483	11.2099	0.489591	2.9764	0.00291655	41
SLC7A5	GSE11969	0.59788	0.378112	0.945382	0.23378	-2.20021	0.0277916	149
SLC7A5	GSE13213	1.82879	1.04042	3.21456	0.287779	2.09764	0.0359371	117
SLC7A5	GSE14814	1.53023	0.807007	2.9016	0.326456	1.30314	0.192525	90
SLC7A5	GSE19188	0.558674	0.312563	0.998574	0.296313	-1.96478	0.0494398	82
SLC7A5	GSE29013	3.3825	0.776883	14.7272	0.750565	1.6236	0.104462	55
SLC7A5	GSE30219	3.42379	1.98371	5.90928	0.278463	4.41979	9.87963e-06	293
SLC7A5	GSE31210	2.5708	1.25786	5.25418	0.364704	2.589	0.00962555	226
SLC7A5	GSE3141	0.619203	0.357037	1.07387	0.280919	-1.70626	0.0879591	111
SLC7A5	GSE31547	0.172931	0.0341738	0.875092	0.827278	-2.12125	0.033901	30
SLC7A5	GSE36471	2.32144	1.05995	5.0843	0.399992	2.10551	0.0352467	115
SLC7A5	GSE37745	1.71695	1.22325	2.4099	0.172981	3.12491	0.00177859	196
SLC7A5	GSE41271	1.73201	1.13489	2.64331	0.215693	2.5466	0.0108779	274
SLC7A5	GSE42127	2.81855	1.01806	7.80328	0.519562	1.99441	0.0461069	176
SLC7A5	GSE50081	1.95111	1.07257	3.54927	0.305282	2.18944	0.0285648	181
SLC7A5	GSE5843	7.84908e+07	0	Inf	5680.65	0.00320007	0.997447	48
SLC7A5	GSE63459	4.21349	1.1146	15.9282	0.678481	2.11987	0.0340169	65
SLC7A5	GSE68465	1.48849	1.10984	1.99633	0.149771	2.65581	0.00791177	442
SLC7A5	GSE68571	4.59499	1.75113	12.0573	0.492204	3.09824	0.00194675	64
SLC7A5	GSE72094	2.36291	1.59797	3.49401	0.199574	4.30864	1.64262e-05	398
SLC7A5	GSE87340	6.19108	2.09877	18.2628	0.551926	3.30317	0.000955969	54
SLC7A5	GSE8894	1.76942	0.890799	3.51467	0.350155	1.62972	0.103161	138
SLC7A5	OncoSG.LUAD	3.95955	1.22019	12.8488	0.600583	2.29133	0.0219446	169
SLC7A5	Roepman.LUAD	3.60686	1.87678	6.93179	0.333312	3.84876	0.000118716	171
SLC7A5	TCGA.LUAD	1.82898	1.31754	2.53896	0.167346	3.60786	0.000308738	567
EIF2B2	ca00153	3.94977	1.75328	8.89803	0.414381	3.31497	0.000916543	86
EIF2B2	ca00182	1.28766	0.89872	1.84493	0.183479	1.37797	0.168214	442
EIF2B2	ca00191	1.50839	0.941115	2.41761	0.240686	1.70781	0.087672	125
EIF2B2	GSE10245	2.2428	0.757308	6.64212	0.553943	1.45813	0.144803	58
EIF2B2	GSE1037	2.30798	0.918176	5.80148	0.470284	1.77844	0.075331	61
EIF2B2	GSE11117	0.588438	0.257018	1.34722	0.422622	-1.25475	0.209571	41
EIF2B2	GSE11969	2.24282	1.15099	4.37037	0.34037	2.37311	0.017639	149
EIF2B2	GSE13213	2.58251	1.41717	4.70612	0.30618	3.09871	0.00194365	117
EIF2B2	GSE14814	2.09253	1.07948	4.05629	0.337708	2.18643	0.0287843	90
EIF2B2	GSE19188	0.538625	0.193455	1.49966	0.522446	-1.18431	0.236292	82
EIF2B2	GSE29013	0.445977	0.144347	1.3779	0.575544	-1.403	0.160617	55
EIF2B2	GSE30219	1.72914	1.28473	2.32727	0.151572	3.61295	0.000302729	293
EIF2B2	GSE31210	2.20734	1.03397	4.71227	0.386935	2.04631	0.0407258	226
EIF2B2	GSE3141	2.86146	1.59989	5.11782	0.296637	3.54416	0.000393865	111
EIF2B2	GSE31547	2.46567	0.659803	9.21417	0.672603	1.34175	0.179678	30
EIF2B2	GSE36471	0.689817	0.359064	1.32525	0.333132	-1.11466	0.264996	115
EIF2B2	GSE37745	2.22424	1.45159	3.40816	0.217737	3.67147	0.000241155	196
EIF2B2	GSE41271	0.657883	0.445746	0.970978	0.198614	-2.10825	0.0350093	274
EIF2B2	GSE42127	0.541022	0.316184	0.925741	0.274054	-2.24152	0.0249927	176
EIF2B2	GSE50081	1.66831	1.04424	2.66535	0.239047	2.14105	0.0322697	181
EIF2B2	GSE5843	0.560185	0.220243	1.42482	0.476303	-1.21664	0.223742	48
EIF2B2	GSE63459	0.23573	0.0622301	0.892957	0.679528	-2.12658	0.0334554	65
EIF2B2	GSE68465	1.30246	0.929206	1.82564	0.172287	1.53379	0.125082	442
EIF2B2	GSE68571	4.57158	1.33823	15.6172	0.626804	2.42477	0.0153179	64
EIF2B2	GSE72094	1.65369	1.13864	2.40171	0.190398	2.64188	0.00824484	398
EIF2B2	GSE87340	2.97188	0.990283	8.91874	0.560704	1.94255	0.0520707	54
EIF2B2	GSE8894	1.65183	0.913202	2.9879	0.302395	1.6597	0.0969744	138
EIF2B2	OncoSG.LUAD	1.59289	0.736822	3.44358	0.393354	1.18354	0.236595	169
EIF2B2	Roepman.LUAD	0.530983	0.238215	1.18357	0.408965	-1.54787	0.121653	171
EIF2B2	TCGA.LUAD	1.6213	1.16808	2.25037	0.167283	2.88869	0.00386848	567
SETDB1	ca00153	0.245521	0.109544	0.550286	0.411771	-3.41057	0.000648281	86
SETDB1	ca00182	1.37197	0.984734	1.91147	0.169202	1.86904	0.061617	442
SETDB1	ca00191	0.353304	0.152084	0.820755	0.430056	-2.41928	0.0155513	125
SETDB1	GSE10245	2.82591	1.1297	7.06892	0.467804	2.22065	0.0263747	58
SETDB1	GSE1037	2.62956	1.07295	6.44445	0.457357	2.11392	0.0345221	61
SETDB1	GSE11117	1.95512	0.82459	4.63564	0.440478	1.5221	0.127984	41
SETDB1	GSE11969	1.4041	0.889577	2.21623	0.232866	1.45749	0.144981	149
SETDB1	GSE13213	1.64966	0.701608	3.87877	0.436207	1.14755	0.251155	117
SETDB1	GSE14814	1.80258	0.892302	3.64148	0.358767	1.64235	0.100518	90
SETDB1	GSE19188	0.472266	0.268691	0.83008	0.28775	-2.60717	0.00912947	82
SETDB1	GSE29013	2.15277	0.766246	6.0482	0.527054	1.45479	0.145726	55
SETDB1	GSE30219	1.51204	1.11242	2.05523	0.156599	2.64026	0.00828421	293
SETDB1	GSE31210	0.455937	0.223162	0.931516	0.364526	-2.15458	0.0311949	226
SETDB1	GSE3141	0.575786	0.339389	0.976842	0.269693	-2.04684	0.0406736	111
SETDB1	GSE31547	0.411739	0.0853635	1.98596	0.802805	-1.10533	0.269016	30
SETDB1	GSE36471	0.623349	0.338706	1.1472	0.311217	-1.51871	0.128836	115
SETDB1	GSE37745	0.805883	0.576198	1.12712	0.17117	-1.26084	0.207368	196
SETDB1	GSE41271	0.750014	0.488779	1.15087	0.218464	-1.31675	0.187922	274
SETDB1	GSE42127	0.46298	0.246418	0.869865	0.321768	-2.39325	0.0167	176
SETDB1	GSE50081	1.56949	0.874449	2.81698	0.298431	1.51041	0.130939	181
SETDB1	GSE5843	0.511035	0.150971	1.72985	0.622129	-1.07906	0.280559	48
SETDB1	GSE63459	1.21144e-08	0	Inf	7095.11	-0.00256921	0.99795	65
SETDB1	GSE68465	1.36934	0.962608	1.94792	0.179818	1.74803	0.0804587	442
SETDB1	GSE68571	0.312756	0.127352	0.768077	0.45841	-2.53557	0.0112263	64
SETDB1	GSE72094	1.84735	1.2305	2.77342	0.207316	2.96045	0.00307186	398
SETDB1	GSE87340	0.293908	0.0916815	0.942193	0.594371	-2.06015	0.0393846	54
SETDB1	GSE8894	1.48106	0.722932	3.03423	0.365925	1.07333	0.283121	138
SETDB1	OncoSG.LUAD	0.512465	0.279334	0.940166	0.30961	-2.15924	0.0308314	169
SETDB1	Roepman.LUAD	0.509286	0.2614	0.992243	0.340291	-1.98285	0.0473844	171
SETDB1	TCGA.LUAD	0.636527	0.45207	0.896247	0.17459	-2.58737	0.00967104	567
CBS	ca00153	0.339626	0.133681	0.862843	0.475717	-2.27007	0.0232034	86
CBS	ca00182	1.36698	1.05422	1.77253	0.132555	2.35831	0.0183586	442
CBS	ca00191	0.580516	0.360771	0.934106	0.242695	-2.24083	0.025037	125
CBS	GSE10245	0.338738	0.100185	1.14531	0.621545	-1.74167	0.0815657	58
CBS	GSE1037	2.29863	0.830238	6.36406	0.519578	1.6019	0.109178	61
CBS	GSE11117	0.376688	0.157226	0.902482	0.44579	-2.19013	0.0285147	41
CBS	GSE11969	0.512082	0.262221	1.00003	0.341485	-1.95988	0.0500095	149
CBS	GSE13213	0.379352	0.18868	0.762708	0.356339	-2.72014	0.00652546	117
CBS	GSE14814	2.77363	1.42717	5.39042	0.339019	3.00914	0.00261984	90
CBS	GSE19188	0.661005	0.360391	1.21237	0.309481	-1.3377	0.180993	82
CBS	GSE29013	2.52461	0.813461	7.83523	0.577839	1.60267	0.109007	55
CBS	GSE30219	2.13312	1.43742	3.16554	0.2014	3.76159	0.000168837	293
CBS	GSE31210	0.521047	0.266661	1.01811	0.341773	-1.90745	0.0564619	226
CBS	GSE3141	0.605484	0.353234	1.03787	0.274953	-1.82477	0.0680356	111
CBS	GSE31547	3.17583	0.656622	15.3603	0.804207	1.43691	0.150745	30
CBS	GSE36471	0.590292	0.303816	1.14689	0.338882	-1.55552	0.119822	115
CBS	GSE37745	1.48377	1.05896	2.079	0.172096	2.29282	0.0218583	196
CBS	GSE41271	1.50524	1.05542	2.14678	0.181133	2.25776	0.0239607	274
CBS	GSE42127	0.530618	0.260242	1.0819	0.363491	-1.74341	0.0812627	176
CBS	GSE50081	1.93367	1.21333	3.08165	0.237783	2.77319	0.00555102	181
CBS	GSE5843	0.29938	0.100568	0.891221	0.556582	-2.16687	0.0302444	46
CBS	GSE63459	4.48196	1.30531	15.3895	0.629411	2.38328	0.0171594	65
CBS	GSE68465	1.31952	1.01795	1.71043	0.132388	2.09435	0.0362292	442
CBS	GSE68571	0.43721	0.175361	1.09005	0.466114	-1.77498	0.0759018	64
CBS	GSE72094	2.20364	1.4686	3.30656	0.207044	3.81615	0.000135552	398
CBS	GSE87340	2.61077	0.905328	7.52888	0.540368	1.77591	0.0757481	54
CBS	GSE8894	2.25024	1.29802	3.90099	0.280717	2.88916	0.00386274	138
CBS	OncoSG.LUAD	3.83376	1.16063	12.6636	0.609645	2.20431	0.0275025	169
CBS	Roepman.LUAD	0.623545	0.265032	1.46702	0.436523	-1.08204	0.279235	171
CBS	TCGA.LUAD	0.815588	0.592338	1.12298	0.163183	-1.24919	0.211597	567
CTH	ca00153	1.84157	0.814081	4.16592	0.416496	1.46609	0.142624	86
CTH	ca00182	1.56419	1.07107	2.28433	0.193221	2.31532	0.0205955	442
CTH	ca00191	0.565869	0.25714	1.24527	0.402427	-1.41489	0.1571	125
CTH	GSE10245	0.573721	0.233558	1.40931	0.458534	-1.21171	0.225622	58
CTH	GSE1037	1.22162e-08	0	Inf	5323.72	-0.00342251	0.997269	61
CTH	GSE11117	2.15547	0.939091	4.94739	0.423912	1.81172	0.0700297	39
CTH	GSE11969	1.57079	0.976917	2.52568	0.242316	1.86359	0.0623794	149
CTH	GSE13213	0.617356	0.276888	1.37647	0.409106	-1.17893	0.238424	117
CTH	GSE14814	1.84558	0.811678	4.19645	0.419112	1.46212	0.143707	90
CTH	GSE19188	1.32047	0.748009	2.33103	0.289968	0.958678	0.337721	82
CTH	GSE29013	4.07624e-09	0	Inf	7959.14	-0.00242716	0.998063	55
CTH	GSE30219	0.648553	0.4731	0.889074	0.16094	-2.69051	0.00713427	293
CTH	GSE31210	0.301575	0.154167	0.589928	0.342345	-3.50155	0.000462555	226
CTH	GSE3141	2.07747	1.05042	4.10874	0.347947	2.10133	0.0356119	111
CTH	GSE31547	3.70111	0.925773	14.7966	0.707034	1.85088	0.0641869	30
CTH	GSE36471	2.26748	0.907901	5.66302	0.466992	1.75307	0.0795908	115
CTH	GSE37745	0.660679	0.441551	0.988551	0.205602	-2.01597	0.0438032	196
CTH	GSE41271	0.688241	0.455554	1.03978	0.210527	-1.77467	0.0759526	274
CTH	GSE42127	0.478837	0.276012	0.830704	0.281084	-2.61984	0.00879701	176
CTH	GSE50081	0.606302	0.383748	0.957927	0.233368	-2.14415	0.0320206	181
CTH	GSE5843	0.254907	0.074539	0.871729	0.627347	-2.17879	0.0293476	48
CTH	GSE63459	3.19292	0.932464	10.9331	0.628001	1.84862	0.0645128	65
CTH	GSE68465	1.63717	1.13184	2.36811	0.188332	2.61755	0.00885641	442
CTH	GSE68571	0.468727	0.178953	1.22773	0.491284	-1.54235	0.122987	64
CTH	GSE72094	0.686267	0.47334	0.994976	0.18952	-1.98654	0.0469734	398
CTH	GSE87340	0.197993	0.0615187	0.637224	0.596383	-2.71557	0.00661608	54
CTH	GSE8894	2.11371	0.994373	4.49303	0.384744	1.9453	0.0517392	138
CTH	OncoSG.LUAD	0.259013	0.0624036	1.07507	0.726165	-1.86029	0.0628449	169
CTH	Roepman.LUAD	0.302994	0.108562	0.845647	0.523678	-2.28011	0.0226012	171
CTH	TCGA.LUAD	0.72507	0.519286	1.0124	0.170317	-1.88758	0.0590818	567
GAMT	ca00153	0.333325	0.142307	0.780746	0.434258	-2.52991	0.011409	86
GAMT	ca00182	0.720995	0.552313	0.941194	0.135981	-2.40566	0.0161435	442
GAMT	ca00191	1.48569	0.75997	2.90441	0.342024	1.15746	0.247086	125
GAMT	GSE10245	1.28497e-08	0	Inf	5658.63	-0.00321102	0.997438	58
GAMT	GSE1037	1.85686	0.61878	5.57211	0.560668	1.10383	0.269665	61
GAMT	GSE11117	2.95241	0.397442	21.932	1.02314	1.05813	0.289996	41
GAMT	GSE11969	1.62542	1.01884	2.59314	0.238323	2.03827	0.0415234	149
GAMT	GSE13213	0.350568	0.174497	0.704296	0.355947	-2.94482	0.00323143	117
GAMT	GSE14814	2.68168	0.949208	7.57622	0.529893	1.86159	0.0626607	90
GAMT	GSE19188	1.90432	0.849387	4.26948	0.411929	1.56368	0.117892	82
GAMT	GSE29013	1.55773	0.582962	4.16242	0.501471	0.883863	0.37677	55
GAMT	GSE30219	0.643475	0.455876	0.908273	0.175851	-2.50707	0.0121735	293
GAMT	GSE31210	0.479753	0.230301	0.999399	0.374437	-1.96157	0.0498125	226
GAMT	GSE3141	0.504655	0.269949	0.943427	0.319212	-2.1424	0.0321612	111
GAMT	GSE31547	2.96994	0.792152	11.1349	0.674269	1.6144	0.10644	30
GAMT	GSE36471	0.660623	0.300978	1.45002	0.401103	-1.03358	0.301333	115
GAMT	GSE37745	0.776638	0.482797	1.24932	0.242545	-1.0422	0.297318	196
GAMT	GSE41271	0.591919	0.38369	0.913154	0.221195	-2.37069	0.0177549	274
GAMT	GSE42127	0.401251	0.238628	0.6747	0.265148	-3.44399	0.000573188	176
GAMT	GSE50081	1.98615	0.906469	4.35182	0.40021	1.7146	0.0864194	181
GAMT	GSE5843	3.46971	1.17835	10.2167	0.551008	2.25781	0.0239575	48
GAMT	GSE63459	0.366929	0.0970603	1.38714	0.678499	-1.47765	0.1395	65
GAMT	GSE68465	0.687706	0.518757	0.911679	0.143843	-2.6028	0.00924659	442
GAMT	GSE68571	0.266367	0.101822	0.696821	0.490648	-2.69619	0.00701381	64
GAMT	GSE72094	0.734713	0.506298	1.06618	0.18998	-1.62267	0.10466	398
GAMT	GSE87340	2.18159	0.729764	6.52176	0.558729	1.39612	0.162677	54
GAMT	GSE8894	1.74405	0.875434	3.4745	0.351662	1.58166	0.113728	138
GAMT	OncoSG.LUAD	1.95685	1.01615	3.76841	0.33435	2.00789	0.0446553	169
GAMT	Roepman.LUAD	3.18151	1.80469	5.60873	0.289275	4.00089	6.31049e-05	171
GAMT	TCGA.LUAD	1.26061	0.846472	1.87735	0.203203	1.13971	0.254406	567
EZH2	ca00153	0.34914	0.118491	1.02876	0.551355	-1.90854	0.0563215	86
EZH2	ca00182	1.75127	1.30349	2.35287	0.150663	3.71914	0.000199899	442
EZH2	ca00191	1.77215	1.01126	3.10554	0.286228	1.99908	0.0455994	125
EZH2	GSE10245	0.501376	0.204013	1.23217	0.45877	-1.50489	0.132352	58
EZH2	GSE1037	4.53318	1.72535	11.9105	0.492864	3.06661	0.00216499	61
EZH2	GSE11117	0.632256	0.27244	1.46729	0.429536	-1.06734	0.285818	41
EZH2	GSE11969	2.9876	1.48585	6.00718	0.356376	3.07111	0.00213262	149
EZH2	GSE13213	2.67326	1.52503	4.68602	0.286375	3.43361	0.000595596	117
EZH2	GSE14814	0.511967	0.225303	1.16337	0.41879	-1.59864	0.1099	90
EZH2	GSE19188	0.653617	0.356605	1.19801	0.309134	-1.37556	0.168957	82
EZH2	GSE29013	3.51101	1.11229	11.0827	0.586481	2.14142	0.0322401	55
EZH2	GSE30219	11.0274	4.53081	26.839	0.453824	5.28923	1.22829e-07	293
EZH2	GSE31210	3.27225	1.53276	6.98584	0.38695	3.06365	0.00218656	226
EZH2	GSE3141	9.2872	1.28536	67.1033	1.009	2.20877	0.0271909	111
EZH2	GSE31547	3.3449e+08	0	Inf	8987.51	0.00218393	0.998257	30
EZH2	GSE36471	1.81293	0.658548	4.99087	0.516675	1.15149	0.249531	115
EZH2	GSE37745	1.38288	0.985048	1.94138	0.173081	1.87292	0.0610792	196
EZH2	GSE41271	2.61201	1.32485	5.14975	0.346346	2.77214	0.00556883	274
EZH2	GSE42127	4.74511	1.48718	15.1401	0.591966	2.63041	0.00852813	176
EZH2	GSE50081	2.78037	1.55454	4.97282	0.29664	3.44722	0.00056638	181
EZH2	GSE5843	0.503949	0.213339	1.19043	0.438576	-1.56251	0.118168	47
EZH2	GSE63459	0.536755	0.142332	2.02419	0.677249	-0.918736	0.358234	65
EZH2	GSE68465	1.65835	1.23776	2.22187	0.149249	3.38913	0.000701144	442
EZH2	GSE68571	5.38101	0.716155	40.4316	1.02897	1.6355	0.101944	63
EZH2	GSE72094	1.82806	1.24513	2.6839	0.195931	3.07891	0.0020776	398
EZH2	GSE87340	10.5858	3.59846	31.1411	0.550526	4.28594	1.81971e-05	54
EZH2	GSE8894	1.75637	1.03482	2.98105	0.269916	2.08676	0.0369094	138
EZH2	OncoSG.LUAD	1.68273	0.881865	3.21091	0.329667	1.57862	0.114423	169
EZH2	Roepman.LUAD	0.57528	0.301196	1.09877	0.330156	-1.67466	0.0940013	171
EZH2	TCGA.LUAD	1.37856	0.942865	2.0156	0.193817	1.65642	0.0976372	567
CDO1	ca00153	0.328534	0.146907	0.734711	0.410639	-2.71069	0.00671429	86
CDO1	ca00182	0.76557	0.59081	0.992024	0.13221	-2.02053	0.0433281	442
CDO1	ca00191	0.408809	0.148974	1.12184	0.515047	-1.73675	0.0824316	125
CDO1	GSE10245	0.5416	0.183109	1.60195	0.5533	-1.10831	0.267729	58
CDO1	GSE1037	0.608852	0.232695	1.59307	0.490746	-1.01107	0.311982	61
CDO1	GSE11117	0.374411	0.156737	0.894387	0.444286	-2.21119	0.0270226	41
CDO1	GSE11969	0.491566	0.264708	0.912844	0.315807	-2.24872	0.0245306	149
CDO1	GSE13213	0.496499	0.263132	0.936834	0.323947	-2.16138	0.0306658	117
CDO1	GSE14814	0.585688	0.302884	1.13255	0.336453	-1.59002	0.11183	90
CDO1	GSE19188	0.451094	0.251452	0.809243	0.298181	-2.66979	0.00758988	82
CDO1	GSE29013	2.32876	0.534069	10.1543	0.751323	1.12513	0.260534	55
CDO1	GSE30219	0.442777	0.310532	0.63134	0.181013	-4.50072	6.77245e-06	293
CDO1	GSE31210	0.236014	0.107173	0.519742	0.402784	-3.58471	0.000337449	226
CDO1	GSE3141	0.465384	0.273411	0.792149	0.271376	-2.81857	0.00482379	111
CDO1	GSE31547	4.25529e-09	0	Inf	12611	-0.00152844	0.99878	30
CDO1	GSE36471	0.285567	0.0895664	0.910482	0.591591	-2.11849	0.0341338	115
CDO1	GSE37745	0.725925	0.499253	1.05551	0.19099	-1.6771	0.0935229	196
CDO1	GSE41271	0.500192	0.327761	0.763335	0.21567	-3.21215	0.00131746	274
CDO1	GSE42127	0.375857	0.217051	0.650852	0.280145	-3.49301	0.000477617	176
CDO1	GSE50081	0.403409	0.217008	0.749923	0.316342	-2.86969	0.00410875	181
CDO1	GSE5843	0.28453	0.0902503	0.897032	0.585854	-2.14544	0.0319174	35
CDO1	GSE63459	0.377861	0.11056	1.29142	0.627037	-1.55211	0.120636	65
CDO1	GSE68465	0.773439	0.595888	1.00389	0.13306	-1.93076	0.0535125	442
CDO1	GSE68571	0.302037	0.109353	0.834238	0.518361	-2.3096	0.0209105	64
CDO1	GSE72094	0.356154	0.245399	0.516895	0.190042	-5.43243	5.55929e-08	398
CDO1	GSE87340	0.264539	0.0825314	0.847929	0.594301	-2.23753	0.0252517	54
CDO1	GSE8894	0.325222	0.166984	0.633407	0.340111	-3.30259	0.000957962	138
CDO1	OncoSG.LUAD	0.340523	0.184827	0.627376	0.311772	-3.45532	0.00054964	169
CDO1	Roepman.LUAD	1.48726	0.808624	2.73545	0.310903	1.27672	0.2017	171
CDO1	TCGA.LUAD	0.633455	0.46854	0.856414	0.153863	-2.96736	0.00300371	567
GOT1	ca00153	5.38978	0.727508	39.9305	1.02177	1.64861	0.0992272	86
GOT1	ca00182	0.782496	0.605044	1.01199	0.13122	-1.86912	0.0616068	442
GOT1	ca00191	1.55472	0.957467	2.52452	0.24733	1.78423	0.074386	125
GOT1	GSE10245	2.33093	0.778922	6.97534	0.559251	1.51322	0.130225	58
GOT1	GSE1037	0.106346	0.0142302	0.794756	1.02621	-2.18382	0.0289757	61
GOT1	GSE11117	3.48328	1.45349	8.34767	0.44593	2.79859	0.00513269	41
GOT1	GSE11969	0.4651	0.24975	0.866137	0.317247	-2.41296	0.0158235	149
GOT1	GSE13213	1.82792	1.01283	3.29897	0.301246	2.00228	0.0452543	117
GOT1	GSE14814	4.28832	1.51942	12.1031	0.529381	2.75018	0.00595624	90
GOT1	GSE19188	0.587715	0.318486	1.08453	0.312588	-1.70036	0.0890624	82
GOT1	GSE29013	2.55319	0.837653	7.78217	0.56863	1.64842	0.0992658	55
GOT1	GSE30219	1.21047	0.916473	1.59878	0.141958	1.34554	0.178452	293
GOT1	GSE31210	4.24872	0.581442	31.0464	1.01474	1.4256	0.153984	226
GOT1	GSE3141	0.357938	0.153541	0.834432	0.43184	-2.37911	0.0173545	111
GOT1	GSE31547	2.72626e-09	0	Inf	8696.6	-0.00226759	0.998191	30
GOT1	GSE36471	2.67167	1.21341	5.88244	0.402695	2.44032	0.0146743	115
GOT1	GSE37745	1.79634	1.06773	3.02214	0.265422	2.20686	0.0273236	196
GOT1	GSE41271	1.49294	1.04684	2.12915	0.181111	2.21273	0.0269165	274
GOT1	GSE42127	1.41195	0.857947	2.32369	0.25418	1.35719	0.174721	176
GOT1	GSE50081	1.94521	1.22471	3.08959	0.23606	2.81864	0.00482269	181
GOT1	GSE5843	0.32882	0.120613	0.896443	0.511706	-2.1736	0.0297349	48
GOT1	GSE63459	2.99931	0.877707	10.2493	0.626963	1.75191	0.0797894	65
GOT1	GSE68465	0.689494	0.451832	1.05216	0.21564	-1.72416	0.084679	442
GOT1	GSE68571	8.34214	1.11602	62.357	1.02632	2.06691	0.0387423	64
GOT1	GSE72094	3.44153	1.40355	8.43872	0.457618	2.70076	0.00691812	398
GOT1	GSE87340	2.9074	0.972532	8.6917	0.55874	1.91011	0.0561184	54
GOT1	GSE8894	2.30848	0.916777	5.81284	0.471172	1.77555	0.0758072	138
GOT1	OncoSG.LUAD	2.71528	1.42468	5.17504	0.329063	3.03558	0.00240073	169
GOT1	Roepman.LUAD	1.68074	0.969444	2.91394	0.280755	1.84943	0.0643957	171
GOT1	TCGA.LUAD	1.74179	1.07378	2.82537	0.246804	2.2484	0.0245509	567
HNMT	ca00153	0.380443	0.161694	0.895129	0.436555	-2.21374	0.0268466	86
HNMT	ca00182	0.718598	0.553525	0.932898	0.133163	-2.48158	0.0130803	442
HNMT	ca00191	0.584305	0.347561	0.982309	0.265047	-2.02731	0.042631	125
HNMT	GSE10245	8.10631e+07	0	Inf	5235.19	0.00347853	0.997225	58
HNMT	GSE1037	0.548423	0.217364	1.38371	0.472189	-1.27218	0.20331	61
HNMT	GSE11117	0.131748	0.0307412	0.564636	0.742508	-2.72975	0.00633821	41
HNMT	GSE11969	0.6272	0.39728	0.990183	0.232976	-2.00231	0.0452516	149
HNMT	GSE13213	0.293128	0.116123	0.739943	0.472439	-2.59747	0.00939135	117
HNMT	GSE14814	1.67246	0.735155	3.80482	0.419381	1.22633	0.220076	90
HNMT	GSE19188	0.456094	0.192402	1.08118	0.44037	-1.78272	0.0746324	82
HNMT	GSE29013	0.619202	0.239507	1.60083	0.484624	-0.989064	0.322632	55
HNMT	GSE30219	0.594633	0.433262	0.816107	0.161534	-3.21797	0.00129102	293
HNMT	GSE31210	0.252439	0.123587	0.515635	0.364409	-3.77758	0.000158358	226
HNMT	GSE3141	2.28418	1.18303	4.41024	0.335682	2.46068	0.0138674	111
HNMT	GSE31547	0.366118	0.0757471	1.7696	0.803869	-1.24995	0.211316	30
HNMT	GSE36471	0.505702	0.257852	0.991788	0.34366	-1.98396	0.0472605	115
HNMT	GSE37745	0.714343	0.499678	1.02123	0.18235	-1.84476	0.0650728	196
HNMT	GSE41271	0.519421	0.349665	0.771589	0.201911	-3.24421	0.00117778	274
HNMT	GSE42127	0.506672	0.309305	0.829976	0.251808	-2.70005	0.00693294	176
HNMT	GSE50081	0.410791	0.165289	1.02094	0.464494	-1.91535	0.0554477	181
HNMT	GSE5843	0.337309	0.147157	0.77317	0.423223	-2.56781	0.0102342	48
HNMT	GSE63459	0.373969	0.0991638	1.41032	0.677257	-1.45231	0.146417	65
HNMT	GSE68465	0.686993	0.523015	0.902382	0.139143	-2.69818	0.00697197	442
HNMT	GSE68571	0.332667	0.0768649	1.43976	0.747509	-1.47237	0.14092	64
HNMT	GSE72094	0.561881	0.355066	0.88916	0.234181	-2.46162	0.0138313	398
HNMT	GSE87340	0.214112	0.0279947	1.63759	1.03802	-1.48481	0.137595	54
HNMT	GSE8894	0.214109	0.0517395	0.886031	0.724638	-2.12695	0.0334243	138
HNMT	OncoSG.LUAD	1.63625	0.831231	3.22089	0.345543	1.42502	0.154153	169
HNMT	Roepman.LUAD	0.463807	0.263566	0.816181	0.288356	-2.66437	0.00771329	171
HNMT	TCGA.LUAD	0.523587	0.318714	0.860155	0.253274	-2.55474	0.0106266	567
MTAP	ca00153	0.341131	0.134672	0.864104	0.474206	-2.26798	0.0233305	86
MTAP	ca00182	1.25096	0.965894	1.62017	0.131949	1.69698	0.089701	442
MTAP	ca00191	1.42042	0.788945	2.55734	0.300012	1.1698	0.242082	125
MTAP	GSE10245	2.27528	0.968282	5.34649	0.435894	1.88602	0.0592923	58
MTAP	GSE1037	5.12926	1.80233	14.5974	0.533623	3.06389	0.0021848	60
MTAP	GSE11117	0.226837	0.03052	1.68595	1.02341	-1.44959	0.147174	41
MTAP	GSE11969	2.82138	1.51204	5.26455	0.318255	3.2591	0.00111765	149
MTAP	GSE13213	3.51512	1.69893	7.27288	0.370965	3.38866	0.000702343	117
MTAP	GSE14814	0.464949	0.204393	1.05766	0.419337	-1.82628	0.0678082	90
MTAP	GSE19188	2.86318	1.40428	5.83775	0.363482	2.89404	0.00380315	82
MTAP	GSE29013	0.404035	0.158535	1.02971	0.477318	-1.89864	0.0576123	55
MTAP	GSE30219	1.49715	1.13344	1.97759	0.141999	2.84204	0.00448261	293
MTAP	GSE31210	0.365508	0.188244	0.709693	0.33855	-2.97288	0.00295019	226
MTAP	GSE3141	0.443778	0.22294	0.883375	0.351243	-2.31301	0.020722	111
MTAP	GSE31547	5.06675	1.18863	21.598	0.739759	2.19355	0.0282675	30
MTAP	GSE36471	1.66244	0.904949	3.05398	0.310292	1.63808	0.101404	115
MTAP	GSE37745	1.55398	1.06224	2.27337	0.194105	2.27104	0.0231444	196
MTAP	GSE41271	3.12079	1.94634	5.00391	0.240889	4.72453	2.30653e-06	274
MTAP	GSE42127	2.58256	1.30905	5.09502	0.34668	2.73676	0.0062047	176
MTAP	GSE50081	1.44488	0.918228	2.27359	0.231297	1.59114	0.111579	181
MTAP	GSE5843	0.369061	0.123597	1.10201	0.558139	-1.78593	0.0741114	47
MTAP	GSE63459	1.14825e-08	0	Inf	6477.93	-0.00282226	0.997748	65
MTAP	GSE68465	1.33513	1.0229	1.74268	0.135916	2.12655	0.0334577	442
MTAP	GSE68571	0.480041	0.158934	1.44991	0.563982	-1.30126	0.193171	63
MTAP	GSE72094	1.65439	1.04551	2.61789	0.234154	2.15001	0.0315542	398
MTAP	GSE87340	3.89053	0.506143	29.905	1.04057	1.30558	0.191696	54
MTAP	GSE8894	1.68481	0.99054	2.86569	0.271004	1.92489	0.0542429	138
MTAP	OncoSG.LUAD	0.367939	0.187126	0.723464	0.344973	-2.89831	0.00375178	169
MTAP	Roepman.LUAD	2.51244	1.36176	4.63544	0.312495	2.94806	0.00319776	171
MTAP	TCGA.LUAD	1.63713	1.17771	2.27577	0.16805	2.93332	0.00335357	567
AHCY	ca00153	2.03945	0.758147	5.48623	0.504887	1.41157	0.158077	86
AHCY	ca00182	1.48196	1.09524	2.00521	0.154282	2.54965	0.0107833	442
AHCY	ca00191	1.51559	0.917276	2.50418	0.256206	1.62294	0.104602	125
AHCY	GSE10245	0.377852	0.111698	1.27819	0.621798	-1.56522	0.11753	58
AHCY	GSE1037	0.3506	0.0468549	2.62343	1.02685	-1.0207	0.307395	61
AHCY	GSE11117	2.81558	1.08253	7.32313	0.487697	2.12257	0.0337901	36
AHCY	GSE11969	2.05265	1.17463	3.58697	0.28479	2.52513	0.0115655	149
AHCY	GSE13213	3.40845	1.89982	6.11508	0.29822	4.11193	3.92367e-05	117
AHCY	GSE14814	0.341676	0.121039	0.964506	0.529476	-2.02822	0.042538	90
AHCY	GSE19188	1.57621	0.875501	2.83772	0.299996	1.51676	0.129327	82
AHCY	GSE29013	3.32937	1.26617	8.75456	0.493269	2.43839	0.0147528	55
AHCY	GSE30219	1.69084	1.27452	2.24316	0.144216	3.64196	0.000270568	293
AHCY	GSE31210	1.94924	1.00326	3.7872	0.338877	1.96957	0.048888	226
AHCY	GSE3141	0.545052	0.246873	1.20338	0.404092	-1.50182	0.133143	111
AHCY	GSE31547	3.93688	0.919937	16.8479	0.741768	1.84746	0.0646801	30
AHCY	GSE36471	2.25885	0.905892	5.63248	0.466178	1.74795	0.0804721	115
AHCY	GSE37745	1.86731	0.979933	3.55823	0.328969	1.89834	0.0576507	196
AHCY	GSE41271	1.67143	1.1241	2.48525	0.202399	2.53794	0.0111506	274
AHCY	GSE42127	1.67164	1.02099	2.73695	0.251554	2.04254	0.0410983	176
AHCY	GSE50081	2.62445	1.05738	6.51396	0.463822	2.08026	0.0375014	181
AHCY	GSE5843	2.13147	0.787905	5.76614	0.50776	1.49049	0.136095	48
AHCY	GSE63459	0.276576	0.0723606	1.05712	0.684105	-1.87876	0.0602771	65
AHCY	GSE68465	1.55444	1.16053	2.08205	0.149104	2.95841	0.00309226	442
AHCY	GSE68571	2.35102	0.784313	7.04733	0.560111	1.52622	0.126956	64
AHCY	GSE72094	1.58085	1.08772	2.29755	0.190757	2.40078	0.0163602	398
AHCY	GSE87340	2.40379	0.667359	8.65831	0.653825	1.34141	0.179788	54
AHCY	GSE8894	2.0201	0.805247	5.06775	0.46927	1.49838	0.134034	138
AHCY	OncoSG.LUAD	2.33369	1.07558	5.0634	0.395205	2.14434	0.032006	169
AHCY	Roepman.LUAD	3.96668	0.96177	16.36	0.722926	1.90604	0.0566445	171
AHCY	TCGA.LUAD	1.37139	1.03519	1.81678	0.143493	2.20101	0.0277356	567
MAT2A	ca00153	7.93643e+07	0	Inf	5370.88	0.0033867	0.997298	86
MAT2A	ca00182	1.4685	1.13217	1.90474	0.132708	2.89539	0.00378684	442
MAT2A	ca00191	0.412715	0.215038	0.792111	0.332631	-2.6606	0.00780008	125
MAT2A	GSE10245	0.202965	0.0272865	1.50971	1.02382	-1.55763	0.119321	58
MAT2A	GSE11117	2.07336	0.913796	4.70434	0.418026	1.74431	0.0811045	41
MAT2A	GSE11969	1.93576	1.01867	3.67851	0.327559	2.01644	0.0437543	149
MAT2A	GSE13213	0.559018	0.307367	1.0167	0.305179	-1.90568	0.0566919	117
MAT2A	GSE14814	1.91257	0.988528	3.70039	0.336735	1.9257	0.0541419	90
MAT2A	GSE19188	0.516163	0.292522	0.910784	0.289742	-2.28249	0.0224603	82
MAT2A	GSE29013	1.77903	0.690514	4.58347	0.48286	1.19303	0.232856	55
MAT2A	GSE30219	0.718372	0.504011	1.0239	0.180814	-1.82933	0.0673506	293
MAT2A	GSE31210	0.391764	0.138194	1.1106	0.531642	-1.76264	0.0779606	226
MAT2A	GSE3141	2.05726	0.932379	4.53926	0.403778	1.78656	0.0740083	111
MAT2A	GSE31547	2.49081e+08	0	Inf	11959.2	0.0016166	0.99871	30
MAT2A	GSE36471	0.705174	0.426404	1.1662	0.256666	-1.36095	0.17353	115
MAT2A	GSE37745	0.676923	0.425754	1.07627	0.236584	-1.6493	0.099087	196
MAT2A	GSE41271	1.68514	1.07437	2.64312	0.229653	2.27234	0.023066	274
MAT2A	GSE42127	1.5277	0.864349	2.70016	0.290589	1.4583	0.144758	176
MAT2A	GSE50081	0.521703	0.328555	0.828398	0.23592	-2.75795	0.00581652	181
MAT2A	GSE5843	0.536431	0.21985	1.30888	0.455105	-1.36851	0.171152	48
MAT2A	GSE63459	8.05499e+07	0	Inf	7374.65	0.00246851	0.99803	65
MAT2A	GSE68465	1.54266	1.13041	2.10525	0.158639	2.73267	0.00628241	442
MAT2A	GSE68571	3.91085	0.520331	29.3943	1.02912	1.32516	0.185117	63
MAT2A	GSE72094	1.25894	0.75047	2.11192	0.263947	0.872417	0.382981	398
MAT2A	GSE87340	0.0646976	0.0143807	0.291069	0.767278	-3.5685	0.000359032	54
MAT2A	GSE8894	0.652194	0.333162	1.27673	0.342716	-1.24713	0.212349	138
MAT2A	OncoSG.LUAD	0.460573	0.245994	0.862327	0.319988	-2.42286	0.0153989	169
MAT2A	Roepman.LUAD	1.63602	0.762182	3.51171	0.38972	1.26313	0.206543	171
MAT2A	TCGA.LUAD	0.651531	0.492702	0.86156	0.142564	-3.00519	0.00265418	567
MAT1A	ca00153	2.4417	0.817896	7.28933	0.558028	1.59973	0.109658	86
MAT1A	ca00182	0.641408	0.464406	0.885871	0.164751	-2.69552	0.00702788	442
MAT1A	ca00191	2.39238	1.08653	5.26765	0.40271	2.16604	0.0303078	125
MAT1A	GSE10245	2.33489	0.543754	10.0261	0.743496	1.14051	0.254072	58
MAT1A	GSE1037	2.87668	0.997477	8.29624	0.5404	1.95529	0.050549	45
MAT1A	GSE11117	5.02942	2.13002	11.8755	0.438362	3.68487	0.000228821	41
MAT1A	GSE11969	1.58573	0.983378	2.55703	0.243782	1.89121	0.0585968	149
MAT1A	GSE13213	1.58852	0.90406	2.7912	0.287589	1.60926	0.10756	117
MAT1A	GSE14814	0.438707	0.206368	0.932621	0.384786	-2.14125	0.0322538	90
MAT1A	GSE19188	0.64808	0.349065	1.20324	0.315698	-1.37391	0.169469	82
MAT1A	GSE29013	2.55061e+08	0	Inf	7653.7	0.0025291	0.997982	55
MAT1A	GSE30219	1.2381	0.847892	1.80788	0.193156	1.10572	0.268847	293
MAT1A	GSE31210	3.54435	1.82504	6.88333	0.338654	3.73642	0.000186657	226
MAT1A	GSE3141	0.595535	0.320907	1.10519	0.31547	-1.64293	0.100398	111
MAT1A	GSE31547	2.07913	0.257454	16.7905	1.06577	0.686782	0.49222	30
MAT1A	GSE36471	2.04276	1.2194	3.42208	0.263243	2.71348	0.00665802	115
MAT1A	GSE37745	0.767598	0.541809	1.08748	0.177735	-1.48811	0.136721	196
MAT1A	GSE41271	1.86199	1.25135	2.77062	0.202771	3.06575	0.00217123	274
MAT1A	GSE42127	2.12863	1.21496	3.72941	0.286113	2.64049	0.00827859	176
MAT1A	GSE50081	1.44558	0.913892	2.28661	0.233961	1.5751	0.115233	181
MAT1A	GSE5843	7.82874e+07	0	Inf	5803.15	0.00313208	0.997501	48
MAT1A	GSE63459	2.61999e+08	0	Inf	9482.76	0.00204412	0.998369	65
MAT1A	GSE68465	0.602021	0.428109	0.846581	0.173939	-2.91748	0.00352872	442
MAT1A	GSE68571	7.66108e+07	0	Inf	8429.69	0.00215361	0.998282	33
MAT1A	GSE72094	0.409072	0.255459	0.655055	0.240223	-3.72097	0.000198455	398
MAT1A	GSE87340	3.31014	1.03717	10.5644	0.5921	2.0216	0.0432174	54
MAT1A	GSE8894	0.664379	0.392441	1.12475	0.26861	-1.52229	0.127937	138
MAT1A	OncoSG.LUAD	1.81867	0.942472	3.50944	0.335391	1.78331	0.0745365	169
MAT1A	Roepman.LUAD	0.417405	0.129356	1.34688	0.59771	-1.46174	0.143812	171
MAT1A	TCGA.LUAD	0.784518	0.529151	1.16312	0.20092	-1.20788	0.227095	567
PNMT	ca00153	0.308483	0.103614	0.918426	0.556641	-2.11283	0.034615	86
PNMT	ca00182	1.24321	0.953808	1.62042	0.135201	1.61016	0.107362	442
PNMT	ca00191	0.618735	0.316279	1.21043	0.34238	-1.40218	0.160861	125
PNMT	GSE10245	0.539068	0.198651	1.46284	0.509342	-1.21316	0.225069	58
PNMT	GSE1037	0.537164	0.218816	1.31867	0.458209	-1.35626	0.175016	61
PNMT	GSE11117	3.71828e-09	0	Inf	7010.28	-0.00276879	0.997791	34
PNMT	GSE11969	0.668542	0.360079	1.24125	0.315708	-1.27541	0.202165	149
PNMT	GSE13213	1.95442	1.06331	3.59233	0.310571	2.15761	0.0309582	117
PNMT	GSE14814	1.65129	0.780556	3.49337	0.382307	1.31193	0.189545	90
PNMT	GSE19188	0.58782	0.324294	1.06549	0.303459	-1.75093	0.0799579	82
PNMT	GSE29013	2.04358	0.726833	5.74575	0.527438	1.35504	0.175404	55
PNMT	GSE30219	1.99126	1.17312	3.37998	0.269955	2.55141	0.0107289	293
PNMT	GSE31210	0.197523	0.0270363	1.44306	1.01465	-1.59849	0.109934	226
PNMT	GSE3141	0.541104	0.320607	0.913249	0.267044	-2.29978	0.0214604	111
PNMT	GSE31547	3.59311	0.857026	15.0643	0.731292	1.74899	0.0802935	30
PNMT	GSE36471	0.594361	0.255154	1.38452	0.431447	-1.20587	0.227869	115
PNMT	GSE37745	1.50763	0.997188	2.27935	0.210899	1.94661	0.0515812	196
PNMT	GSE41271	0.648627	0.447117	0.940955	0.189818	-2.28058	0.022573	274
PNMT	GSE42127	0.383607	0.193526	0.760385	0.349091	-2.74466	0.00605733	176
PNMT	GSE50081	1.8282	1.15297	2.89886	0.235202	2.56516	0.0103129	181
PNMT	GSE63459	2.89465	0.370517	22.6144	1.04886	1.01336	0.31089	65
PNMT	GSE68465	1.55028	0.958272	2.50801	0.245442	1.7863	0.0740502	442
PNMT	GSE68571	1.91554	0.730806	5.02088	0.491645	1.32209	0.186138	64
PNMT	GSE72094	0.651876	0.448529	0.947413	0.190759	-2.24315	0.0248872	398
PNMT	GSE87340	1.69402	0.472208	6.07722	0.651768	0.808732	0.418669	54
PNMT	GSE8894	2.52807	1.29574	4.93242	0.341013	2.7197	0.00653408	138
PNMT	OncoSG.LUAD	0.662919	0.316223	1.38972	0.377663	-1.08854	0.276356	169
PNMT	Roepman.LUAD	1.74543	0.84417	3.60889	0.37062	1.50289	0.132868	171
PNMT	TCGA.LUAD	0.718116	0.489892	1.05266	0.195129	-1.69695	0.0897063	567
PCMT1	ca00182	1.30145	1.00621	1.68331	0.131272	2.0071	0.0447388	442
PCMT1	ca00191	0.636864	0.367459	1.10379	0.28059	-1.60804	0.107827	125
PCMT1	GSE10245	0.359913	0.153408	0.844401	0.435092	-2.34868	0.0188401	58
PCMT1	GSE1037	0.333721	0.0437773	2.54401	1.03634	-1.05896	0.289616	61
PCMT1	GSE11117	4.82795	1.74554	13.3536	0.519071	3.03316	0.0024201	41
PCMT1	GSE11969	2.18175	1.38044	3.44819	0.233536	3.3405	0.000836284	149
PCMT1	GSE13213	2.9844	1.54581	5.76177	0.335642	3.25763	0.00112348	117
PCMT1	GSE14814	2.49051	1.17861	5.2627	0.381719	2.39047	0.0168267	90
PCMT1	GSE19188	0.675444	0.267276	1.70694	0.473013	-0.829542	0.406798	82
PCMT1	GSE29013	4.52102	0.600883	34.016	1.02966	1.46528	0.142844	55
PCMT1	GSE30219	0.556694	0.359518	0.862008	0.223091	-2.62557	0.00865039	293
PCMT1	GSE31210	2.4753	1.27526	4.80462	0.338381	2.67853	0.00739456	226
PCMT1	GSE3141	2.42242	0.876025	6.69858	0.518953	1.70491	0.0882112	111
PCMT1	GSE31547	15.1509	1.88819	121.572	1.06249	2.5582	0.0105216	30
PCMT1	GSE36471	1.4217	0.873086	2.31503	0.248765	1.41439	0.157248	115
PCMT1	GSE37745	1.50363	1.08285	2.08791	0.167496	2.43517	0.0148849	196
PCMT1	GSE41271	0.556602	0.346297	0.894626	0.242124	-2.41985	0.0155269	274
PCMT1	GSE42127	1.52108	0.881934	2.62342	0.278096	1.50818	0.131507	176
PCMT1	GSE50081	0.63721	0.403057	1.00739	0.233688	-1.92845	0.0537994	181
PCMT1	GSE5843	1.67467	0.568112	4.93656	0.551568	0.934819	0.349882	48
PCMT1	GSE63459	3.36275	1.02452	11.0375	0.606408	1.9999	0.0455105	65
PCMT1	GSE68465	1.43023	1.1052	1.85086	0.131539	2.7204	0.00652037	442
PCMT1	GSE68571	2.29685	0.941585	5.60281	0.454972	1.82767	0.0675994	64
PCMT1	GSE72094	1.4556	1.00623	2.10567	0.188377	1.99292	0.0462699	398
PCMT1	GSE87340	1.94226	0.672656	5.60818	0.541017	1.22705	0.219805	54
PCMT1	GSE8894	1.52539	0.897193	2.59345	0.270789	1.55934	0.118916	138
PCMT1	OncoSG.LUAD	2.54721	1.36358	4.75827	0.318825	2.93265	0.00336085	169
PCMT1	Roepman.LUAD	0.485262	0.224698	1.04798	0.392831	-1.84066	0.0656719	171
PCMT1	TCGA.LUAD	1.28918	0.969522	1.71424	0.145391	1.74708	0.080624	567
BHMT	ca00153	0.202033	0.0272425	1.49829	1.02229	-1.56446	0.117711	86
BHMT	ca00182	0.737841	0.470817	1.15631	0.229218	-1.32637	0.184718	442
BHMT	ca00191	1.59328	0.988194	2.56886	0.243713	1.91123	0.0559747	125
BHMT	GSE10245	0.441369	0.183983	1.05883	0.446457	-1.83192	0.0669637	58
BHMT	GSE1037	0.317378	0.0927957	1.08549	0.627406	-1.82921	0.0673675	61
BHMT	GSE11117	3.03095	0.942413	9.74802	0.596025	1.86045	0.0628215	25
BHMT	GSE11969	0.683645	0.431342	1.08353	0.234973	-1.61855	0.105544	149
BHMT	GSE13213	2.73162	0.813334	9.17426	0.618127	1.62571	0.104012	57
BHMT	GSE14814	1.82477	0.883737	3.76786	0.369931	1.62586	0.103979	90
BHMT	GSE19188	3.66903	1.84951	7.27858	0.3495	3.71939	0.000199708	82
BHMT	GSE29013	0.365761	0.104958	1.27462	0.636963	-1.57902	0.114332	55
BHMT	GSE30219	0.790052	0.581569	1.07327	0.156313	-1.50759	0.13166	293
BHMT	GSE31210	0.400394	0.203555	0.787577	0.345165	-2.65179	0.00800663	226
BHMT	GSE3141	0.651986	0.337664	1.2589	0.335706	-1.27413	0.202617	111
BHMT	GSE31547	0.289299	0.0769693	1.08736	0.67555	-1.83598	0.0663606	30
BHMT	GSE36471	0.647222	0.328647	1.27461	0.345774	-1.25824	0.208306	115
BHMT	GSE37745	1.46448	0.936899	2.28914	0.227902	1.67396	0.0941381	196
BHMT	GSE41271	0.507306	0.236453	1.08842	0.389478	-1.74243	0.0814324	274
BHMT	GSE42127	0.6218	0.306685	1.26069	0.360617	-1.31757	0.187648	176
BHMT	GSE50081	1.39476	0.886297	2.19492	0.231343	1.43821	0.150374	181
BHMT	GSE5843	2.10182	0.825469	5.35166	0.476848	1.55773	0.119297	48
BHMT	GSE63459	2.70346	0.583584	12.5238	0.782208	1.27144	0.203571	65
BHMT	GSE68465	0.789697	0.553608	1.12647	0.181224	-1.30284	0.192631	442
BHMT	GSE68571	2.75892e+08	0	Inf	7109.22	0.00273385	0.997819	57
BHMT	GSE72094	0.546096	0.344544	0.865551	0.23499	-2.57441	0.0100411	398
BHMT	GSE87340	1.51362	0.524844	4.36518	0.540396	0.767034	0.443061	54
BHMT	GSE8894	0.498267	0.274376	0.904852	0.304411	-2.28842	0.0221134	138
BHMT	OncoSG.LUAD	0.384078	0.208627	0.70708	0.311382	-3.0731	0.00211847	169
BHMT	Roepman.LUAD	1.71213	0.729077	4.02068	0.435577	1.23454	0.217001	171
BHMT	TCGA.LUAD	0.717675	0.513645	1.00275	0.170659	-1.94386	0.0519119	567
MTHFD1	ca00153	0.337196	0.079095	1.43752	0.739816	-1.46941	0.141722	86
MTHFD1	ca00182	1.21337	0.89328	1.64815	0.156255	1.23771	0.215822	442
MTHFD1	ca00191	3.04106	1.58069	5.85063	0.333855	3.33141	0.000864085	125
MTHFD1	GSE10245	2.22608	0.819871	6.04418	0.509628	1.57025	0.116356	58
MTHFD1	GSE1037	4.99153	1.99599	12.4827	0.467663	3.43782	0.000586422	61
MTHFD1	GSE11117	2.40299	1.01517	5.68811	0.439632	1.99421	0.0461297	41
MTHFD1	GSE11969	2.22605	1.0678	4.64068	0.374818	2.13498	0.0327626	149
MTHFD1	GSE13213	1.9378	1.02645	3.65828	0.324211	2.0405	0.041301	117
MTHFD1	GSE14814	2.83529	0.871481	9.22438	0.601902	1.73142	0.083377	90
MTHFD1	GSE19188	1.37688	0.786376	2.41079	0.285789	1.11907	0.263112	82
MTHFD1	GSE29013	0.286562	0.101371	0.810073	0.530197	-2.35723	0.0184117	55
MTHFD1	GSE30219	3.37015	1.91811	5.92143	0.287566	4.22497	2.38975e-05	293
MTHFD1	GSE31210	1.97445	0.966683	4.03283	0.364382	1.86697	0.0619056	226
MTHFD1	GSE3141	1.68682	0.981053	2.9003	0.276521	1.89079	0.0586525	111
MTHFD1	GSE31547	3.12987	0.836795	11.7066	0.673056	1.69524	0.0900303	30
MTHFD1	GSE36471	1.8214	1.10608	2.99933	0.254485	2.35616	0.0184652	115
MTHFD1	GSE37745	1.59214	1.14637	2.21126	0.167595	2.77504	0.00551948	196
MTHFD1	GSE41271	1.86044	1.28643	2.69058	0.18824	3.298	0.00097377	274
MTHFD1	GSE42127	1.79411	0.973562	3.30623	0.311894	1.87406	0.0609227	176
MTHFD1	GSE50081	2.92774	1.50078	5.71148	0.340948	3.15072	0.00162869	181
MTHFD1	GSE5843	2.57098	0.595767	11.0948	0.74603	1.26575	0.205603	47
MTHFD1	GSE63459	2.93807	0.778655	11.0861	0.677532	1.5907	0.111677	65
MTHFD1	GSE68465	1.23915	0.912205	1.68327	0.156286	1.372	0.170062	442
MTHFD1	GSE68571	2.31906	0.774029	6.94814	0.559862	1.50245	0.132981	64
MTHFD1	GSE72094	1.54603	1.06843	2.23711	0.188522	2.31107	0.0208289	398
MTHFD1	GSE87340	8.23872	2.81586	24.1051	0.547754	3.84999	0.000118125	54
MTHFD1	GSE8894	2.18368	1.26265	3.77656	0.279495	2.79437	0.00520003	138
MTHFD1	OncoSG.LUAD	0.604207	0.308371	1.18385	0.343177	-1.46816	0.142061	169
MTHFD1	TCGA.LUAD	1.8184	1.38423	2.38877	0.139196	4.29582	1.7405e-05	567
PRMT2	ca00153	0.132007	0.0407254	0.427887	0.600013	-3.37476	0.000738807	86
PRMT2	ca00182	0.677155	0.522944	0.876841	0.131852	-2.95676	0.00310895	442
PRMT2	ca00191	0.695468	0.43138	1.12123	0.243676	-1.49038	0.136125	125
PRMT2	GSE10245	0.309035	0.131315	0.727278	0.436668	-2.68923	0.00716176	58
PRMT2	GSE1037	0.331671	0.0436816	2.51836	1.03431	-1.067	0.285973	50
PRMT2	GSE11117	2.90405	1.17923	7.15171	0.459828	2.31849	0.0204229	40
PRMT2	GSE13213	1.75194	0.972344	3.15658	0.300397	1.8666	0.0619572	117
PRMT2	GSE14814	1.95817	1.02597	3.7374	0.329791	2.03769	0.0415809	90
PRMT2	GSE19188	0.388643	0.139468	1.08299	0.522879	-1.80748	0.0706868	82
PRMT2	GSE29013	0.298654	0.0857622	1.04002	0.636597	-1.89833	0.0576527	55
PRMT2	GSE30219	0.673904	0.508689	0.892777	0.143497	-2.75035	0.00595318	293
PRMT2	GSE31210	0.655162	0.329796	1.30152	0.350214	-1.20747	0.227252	226
PRMT2	GSE3141	2.99562	0.934371	9.60406	0.594416	1.84577	0.0649262	111
PRMT2	GSE31547	0.349562	0.0721254	1.69419	0.805258	-1.30526	0.191803	30
PRMT2	GSE36471	1.74458	0.794243	3.83202	0.401476	1.38617	0.165696	115
PRMT2	GSE37745	0.797315	0.570145	1.115	0.171104	-1.32379	0.185573	196
PRMT2	GSE41271	0.684461	0.414652	1.12983	0.255715	-1.4826	0.138181	274
PRMT2	GSE42127	0.505481	0.25593	0.998362	0.347254	-1.96468	0.0494508	176
PRMT2	GSE50081	0.293803	0.11854	0.728193	0.463099	-2.64489	0.00817176	181
PRMT2	GSE5843	1.86375	0.802834	4.32661	0.4297	1.44889	0.147368	48
PRMT2	GSE63459	0.327214	0.0990193	1.08129	0.609857	-1.83181	0.0669799	65
PRMT2	GSE68465	0.645789	0.496326	0.84026	0.134308	-3.25582	0.00113066	442
PRMT2	GSE68571	0.223517	0.0721025	0.692904	0.577256	-2.5955	0.00944546	64
PRMT2	GSE72094	0.400458	0.256574	0.625032	0.227143	-4.02893	5.60312e-05	398
PRMT2	GSE87340	0.209363	0.0646261	0.678256	0.599732	-2.6073	0.00912587	54
PRMT2	GSE8894	0.55412	0.315402	0.973515	0.287522	-2.05332	0.0400415	138
PRMT2	OncoSG.LUAD	0.511369	0.27656	0.945539	0.31361	-2.13853	0.0324739	169
PRMT2	Roepman.LUAD	0.54528	0.263121	1.13001	0.371784	-1.63121	0.102847	171
PRMT2	TCGA.LUAD	0.554745	0.380261	0.809292	0.192683	-3.05812	0.00222731	567
EIF2B4	ca00182	0.741996	0.566863	0.971236	0.137363	-2.17243	0.029823	442
EIF2B4	ca00191	1.436	0.897596	2.29735	0.239748	1.50934	0.131211	125
EIF2B4	GSE10245	3.42844	1.25685	9.35207	0.511996	2.40648	0.0161072	58
EIF2B4	GSE1037	0.28526	0.11526	0.705998	0.462361	-2.71293	0.00666907	61
EIF2B4	GSE11117	2.4763	0.734835	8.34481	0.619845	1.46289	0.143498	41
EIF2B4	GSE11969	1.72572	1.09064	2.73063	0.234129	2.33054	0.0197778	149
EIF2B4	GSE13213	1.98909	0.888544	4.45276	0.411154	1.67255	0.0944156	117
EIF2B4	GSE14814	2.2455	1.18435	4.25742	0.326401	2.47833	0.0132001	90
EIF2B4	GSE19188	1.92271	1.09258	3.38356	0.28837	2.267	0.0233905	82
EIF2B4	GSE29013	0.365742	0.136208	0.982083	0.503962	-1.99584	0.0459515	55
EIF2B4	GSE30219	1.55721	1.12675	2.15213	0.165084	2.68286	0.00729954	293
EIF2B4	GSE31210	4.12465	0.56448	30.1388	1.01473	1.39641	0.16259	226
EIF2B4	GSE3141	1.75161	1.02945	2.98034	0.271181	2.067	0.0387338	111
EIF2B4	GSE31547	0.362783	0.0904173	1.4556	0.708874	-1.43037	0.152611	30
EIF2B4	GSE36471	0.634238	0.388262	1.03605	0.250384	-1.81853	0.0689837	115
EIF2B4	GSE37745	0.777977	0.553824	1.09285	0.173396	-1.44789	0.147647	196
EIF2B4	GSE41271	1.18998	0.833443	1.69903	0.1817	0.957263	0.338434	274
EIF2B4	GSE42127	0.705719	0.388992	1.28033	0.303913	-1.14683	0.251451	176
EIF2B4	GSE50081	0.639509	0.396986	1.03019	0.243269	-1.83769	0.0661079	181
EIF2B4	GSE5843	2.66927	1.14794	6.20678	0.430536	2.28043	0.0225824	48
EIF2B4	GSE63459	0.362632	0.11048	1.19028	0.606416	-1.67272	0.0943818	65
EIF2B4	GSE68465	0.772035	0.570535	1.0447	0.154317	-1.67658	0.0936237	442
EIF2B4	GSE72094	0.612887	0.417445	0.899831	0.195936	-2.49865	0.0124667	398
EIF2B4	GSE87340	3.03155	0.845372	10.8713	0.651569	1.70216	0.0887258	54
EIF2B4	GSE8894	1.70429	1.00351	2.89445	0.270231	1.97294	0.0485019	138
EIF2B4	OncoSG.LUAD	0.553826	0.264658	1.15894	0.376748	-1.56843	0.11678	169
EIF2B4	Roepman.LUAD	0.690881	0.359955	1.32604	0.332653	-1.11164	0.266295	171
EIF2B4	TCGA.LUAD	0.716016	0.474476	1.08052	0.209948	-1.59112	0.111582	567
RNMT	ca00182	1.24018	0.941782	1.63311	0.140428	1.53283	0.125318	442
RNMT	ca00191	0.762627	0.472253	1.23154	0.244522	-1.10823	0.267763	125
RNMT	GSE10245	0.220619	0.0729041	0.667627	0.564955	-2.67511	0.00747046	58
RNMT	GSE1037	2.93858	1.11126	7.77067	0.496147	2.17259	0.029811	59
RNMT	GSE11117	3.03052	1.12093	8.19321	0.507444	2.18494	0.0288932	41
RNMT	GSE11969	2.03501	1.28721	3.21726	0.233692	3.04034	0.00236314	149
RNMT	GSE13213	2.99857	1.18854	7.56514	0.472159	2.32578	0.0200303	117
RNMT	GSE14814	0.548322	0.266145	1.12967	0.368793	-1.62935	0.103239	90
RNMT	GSE19188	2.46507	1.32686	4.57967	0.31603	2.85485	0.00430566	82
RNMT	GSE29013	2.85234	1.07536	7.56567	0.497704	2.10595	0.0352088	55
RNMT	GSE30219	1.72967	1.26445	2.36604	0.159845	3.42788	0.000608323	293
RNMT	GSE31210	2.12247	0.963574	4.67516	0.402908	1.86787	0.0617804	226
RNMT	GSE3141	0.513362	0.306221	0.860622	0.263614	-2.52936	0.0114272	111
RNMT	GSE31547	2.48786e-09	0	Inf	10102.9	-0.001961	0.998435	30
RNMT	GSE36471	0.638297	0.389452	1.04615	0.252078	-1.781	0.0749123	115
RNMT	GSE37745	1.41949	0.784873	2.56722	0.302316	1.1587	0.246576	196
RNMT	GSE41271	1.70928	1.13675	2.57017	0.208115	2.57585	0.00999933	274
RNMT	GSE42127	2.02787	1.16131	3.54106	0.284413	2.48577	0.0129271	176
RNMT	GSE50081	2.18356	1.21638	3.91975	0.298512	2.61616	0.00889241	181
RNMT	GSE5843	0.399472	0.156988	1.0165	0.476527	-1.92562	0.0541513	48
RNMT	GSE63459	0.268387	0.0815866	0.882888	0.607545	-2.16498	0.0303891	65
RNMT	GSE68465	1.23818	0.903373	1.69707	0.160851	1.3282	0.184112	442
RNMT	GSE72094	1.73452	1.19888	2.50946	0.188441	2.92254	0.00347188	398
RNMT	GSE87340	5.13215	1.42685	18.4595	0.6531	2.50425	0.0122712	54
RNMT	GSE8894	0.645786	0.33373	1.24963	0.336811	-1.29832	0.194179	138
RNMT	OncoSG.LUAD	0.497309	0.240787	1.02712	0.370058	-1.88766	0.0590711	169
RNMT	Roepman.LUAD	0.498892	0.272048	0.914887	0.309399	-2.24747	0.0246099	171
RNMT	TCGA.LUAD	0.726584	0.529606	0.996822	0.161339	-1.97969	0.0477384	567
PRMT1	ca00153	0.412406	0.177692	0.957155	0.429578	-2.0619	0.0392173	86
PRMT1	ca00182	1.25825	0.960794	1.6478	0.137614	1.66933	0.0950523	442
PRMT1	ca00191	1.42849	0.825528	2.47186	0.279776	1.27466	0.20243	125
PRMT1	GSE10245	2.8052	1.18022	6.66753	0.44173	2.33508	0.0195391	58
PRMT1	GSE1037	1.21202e-08	0	Inf	5266.98	-0.00346088	0.997239	61
PRMT1	GSE13213	2.36011	1.22683	4.54028	0.333822	2.57235	0.0101009	117
PRMT1	GSE14814	2.52727	1.10818	5.76359	0.420632	2.20416	0.0275132	90
PRMT1	GSE19188	0.564733	0.323835	0.984833	0.28374	-2.01383	0.0440277	82
PRMT1	GSE29013	1.88111	0.659662	5.36421	0.534647	1.18183	0.237274	55
PRMT1	GSE30219	2.16943	1.59841	2.94443	0.155846	4.96942	6.71523e-07	293
PRMT1	GSE31210	3.72224	1.54462	8.96993	0.448759	2.9288	0.00340269	226
PRMT1	GSE3141	2.05538	1.10761	3.81416	0.315444	2.28397	0.0223734	111
PRMT1	GSE31547	0.560778	0.150423	2.09058	0.671375	-0.86156	0.38893	30
PRMT1	GSE36471	2.40312	1.30879	4.41245	0.310037	2.82795	0.00468476	115
PRMT1	GSE37745	1.88725	1.08285	3.2892	0.283435	2.2408	0.0250388	196
PRMT1	GSE41271	1.67668	1.04612	2.68732	0.240682	2.14729	0.03177	274
PRMT1	GSE42127	1.70983	0.925935	3.15739	0.312939	1.71406	0.086517	176
PRMT1	GSE50081	1.94985	1.22789	3.09631	0.235952	2.83004	0.00465428	181
PRMT1	GSE5843	2.89888e+08	0	Inf	10418.1	0.0018703	0.998508	22
PRMT1	GSE63459	0.268216	0.0577993	1.24465	0.783084	-1.68048	0.0928631	65
PRMT1	GSE68465	1.19236	0.914219	1.55512	0.135523	1.29819	0.194222	442
PRMT1	GSE68571	0.475522	0.177309	1.27529	0.503335	-1.47683	0.13972	64
PRMT1	GSE72094	2.11505	1.27528	3.50779	0.258123	2.90202	0.00370768	398
PRMT1	GSE87340	2.67934	0.896482	8.00783	0.558607	1.76434	0.0776749	54
PRMT1	GSE8894	2.71553	1.07917	6.83313	0.470823	2.12179	0.0338554	138
PRMT1	OncoSG.LUAD	2.21845	1.20254	4.09262	0.312442	2.55027	0.010764	169
PRMT1	Roepman.LUAD	0.681829	0.269636	1.72414	0.473328	-0.809115	0.418449	171
PRMT1	TCGA.LUAD	1.43677	1.05383	1.95888	0.158152	2.29146	0.0219366	567
SHMT1	ca00153	0.496475	0.166636	1.47919	0.55701	-1.25711	0.208714	86
SHMT1	ca00182	0.80458	0.601334	1.07652	0.148559	-1.46363	0.143295	442
SHMT1	ca00191	0.528434	0.318749	0.876056	0.257919	-2.47301	0.0133979	125
SHMT1	GSE10245	0.390072	0.115327	1.31934	0.621725	-1.51421	0.129972	58
SHMT1	GSE1037	1.75257	0.671366	4.57499	0.489561	1.14609	0.251758	61
SHMT1	GSE11117	1.97499	0.840615	4.64015	0.435816	1.56158	0.118386	40
SHMT1	GSE13213	0.685021	0.271338	1.7294	0.4725	-0.800648	0.423335	117
SHMT1	GSE14814	9.23025	1.26397	67.4048	1.01442	2.19089	0.0284598	90
SHMT1	GSE19188	0.369642	0.173236	0.788722	0.38668	-2.57376	0.0100601	82
SHMT1	GSE29013	0.27976	0.0917602	0.852939	0.568763	-2.23964	0.0251145	55
SHMT1	GSE30219	0.792497	0.574305	1.09358	0.164303	-1.41548	0.156929	293
SHMT1	GSE31210	0.313959	0.160522	0.614064	0.342269	-3.38474	0.000712455	226
SHMT1	GSE3141	0.438907	0.247075	0.779681	0.293167	-2.80887	0.0049716	111
SHMT1	GSE31547	3.32735	0.835132	13.2569	0.70529	1.70451	0.088285	30
SHMT1	GSE36471	0.690475	0.407418	1.17019	0.269158	-1.37606	0.168805	115
SHMT1	GSE37745	1.49305	1.0609	2.10125	0.174345	2.29903	0.0215033	196
SHMT1	GSE41271	1.71313	1.17659	2.49432	0.191685	2.80835	0.00497954	274
SHMT1	GSE42127	1.69761	0.902583	3.19294	0.322311	1.64196	0.100597	176
SHMT1	GSE50081	1.65165	1.02888	2.65137	0.241485	2.07787	0.0377213	181
SHMT1	GSE5843	0.240901	0.0948291	0.611978	0.475677	-2.9923	0.00276882	47
SHMT1	GSE63459	0.194562	0.0514115	0.736304	0.679038	-2.41077	0.0159191	65
SHMT1	GSE68465	1.82562	1.12641	2.95885	0.246373	2.44312	0.0145611	442
SHMT1	GSE72094	0.58932	0.405442	0.856591	0.190815	-2.77119	0.00558514	398
SHMT1	GSE87340	9.29913	1.20848	71.5558	1.04112	2.14185	0.0322056	54
SHMT1	GSE8894	0.680897	0.359089	1.2911	0.326455	-1.17733	0.239065	138
SHMT1	OncoSG.LUAD	1.5252	0.809662	2.87311	0.323101	1.30649	0.191386	169
SHMT1	Roepman.LUAD	1.58978	0.830342	3.04381	0.33139	1.39894	0.161831	171
SHMT1	TCGA.LUAD	0.628632	0.430175	0.918647	0.193552	-2.39836	0.0164685	567
PEMT	ca00182	0.559578	0.388529	0.805931	0.186134	-3.11911	0.00181396	442
PEMT	ca00191	1.96553	0.790911	4.88465	0.464465	1.45493	0.145688	125
PEMT	GSE10245	1.80582	0.755176	4.31817	0.444813	1.32868	0.183954	58
PEMT	GSE1037	4.00654	1.41417	11.3511	0.531328	2.61218	0.0089966	61
PEMT	GSE11117	6.30757	1.83434	21.6892	0.630146	2.92274	0.0034697	22
PEMT	GSE11969	0.559306	0.311846	1.00313	0.29806	-1.94947	0.0512391	149
PEMT	GSE13213	0.554215	0.199225	1.54175	0.522009	-1.13064	0.258208	117
PEMT	GSE14814	0.467621	0.195173	1.12039	0.44581	-1.70498	0.0881983	90
PEMT	GSE19188	0.248876	0.060414	1.02524	0.722326	-1.92545	0.0541731	82
PEMT	GSE29013	0.306329	0.0405893	2.31188	1.03122	-1.14728	0.251267	55
PEMT	GSE30219	1.2486	0.937236	1.66341	0.146352	1.51706	0.129252	293
PEMT	GSE31210	0.370375	0.190364	0.720609	0.339588	-2.92483	0.00344641	226
PEMT	GSE3141	0.547316	0.295035	1.01532	0.315277	-1.91174	0.0559094	111
PEMT	GSE31547	0.236556	0.0487598	1.14764	0.805769	-1.78906	0.0736049	30
PEMT	GSE36471	1.65892	0.987668	2.78636	0.264583	1.91307	0.0557397	115
PEMT	GSE37745	1.65488	1.06237	2.57785	0.22614	2.22752	0.0259126	196
PEMT	GSE41271	1.22961	0.846787	1.7855	0.190311	1.0861	0.277434	274
PEMT	GSE42127	0.414783	0.150647	1.14204	0.516752	-1.70295	0.0885782	176
PEMT	GSE50081	0.598051	0.355307	1.00664	0.265664	-1.93507	0.0529818	181
PEMT	GSE5843	2.29008	0.53495	9.80366	0.741936	1.11679	0.264084	48
PEMT	GSE63459	0.265585	0.0573721	1.22943	0.781838	-1.69578	0.0899285	65
PEMT	GSE68465	0.788841	0.609265	1.02135	0.131794	-1.79971	0.0719067	442
PEMT	GSE72094	0.748559	0.446424	1.25518	0.26372	-1.09815	0.272138	398
PEMT	GSE87340	0.323095	0.1012	1.03153	0.59228	-1.90756	0.0564482	54
PEMT	GSE8894	0.735969	0.427905	1.26582	0.276682	-1.10801	0.267857	138
PEMT	OncoSG.LUAD	1.90518	0.679535	5.34146	0.525991	1.22545	0.220405	169
PEMT	Roepman.LUAD	2.00727	1.13725	3.54289	0.289886	2.40363	0.0162332	171
PEMT	TCGA.LUAD	0.775397	0.526168	1.14268	0.197838	-1.2858	0.198512	567
GNMT	ca00182	0.455822	0.323022	0.643219	0.175708	-4.47135	7.77271e-06	442
GNMT	ca00191	0.498525	0.300948	0.825812	0.257512	-2.70318	0.00686791	125
GNMT	GSE10245	0.491016	0.144988	1.66287	0.622372	-1.14285	0.2531	58
GNMT	GSE11117	0.485655	0.163336	1.44403	0.555975	-1.29908	0.193916	38
GNMT	GSE11969	0.171275	0.0419741	0.698888	0.717472	-2.45931	0.0139205	149
GNMT	GSE13213	0.376879	0.19635	0.723392	0.332673	-2.9333	0.00335375	117
GNMT	GSE14814	5.38936	0.738968	39.305	1.01376	1.66157	0.0965993	90
GNMT	GSE19188	3.15771	1.69934	5.86764	0.316132	3.63724	0.00027558	82
GNMT	GSE29013	7.97923	1.0579	60.1834	1.03091	2.01456	0.0439503	55
GNMT	GSE30219	0.427446	0.276306	0.661261	0.222616	-3.8179	0.000134591	293
GNMT	GSE31210	0.303788	0.156168	0.590948	0.339495	-3.50941	0.00044911	226
GNMT	GSE3141	0.57408	0.289328	1.13908	0.349603	-1.58748	0.112404	111
GNMT	GSE31547	0.232612	0.0290188	1.86459	1.06197	-1.37328	0.169665	30
GNMT	GSE36471	0.51897	0.276802	0.973005	0.320691	-2.0453	0.0408254	115
GNMT	GSE37745	1.39561	1.00548	1.93712	0.167284	1.99261	0.0463043	196
GNMT	GSE41271	1.38012	0.917875	2.07516	0.208098	1.54817	0.121582	274
GNMT	GSE42127	0.409212	0.1486	1.12688	0.516835	-1.72883	0.0838387	176
GNMT	GSE50081	0.298992	0.120445	0.742211	0.463895	-2.60261	0.00925164	181
GNMT	GSE5843	0.299073	0.0858074	1.04239	0.637044	-1.8948	0.0581196	48
GNMT	GSE63459	5.30497	1.14455	24.5883	0.782478	2.13251	0.0329648	65
GNMT	GSE68465	0.552565	0.400256	0.762831	0.164526	-3.60541	0.000311661	442
GNMT	GSE72094	0.473511	0.32725	0.685143	0.1885	-3.96595	7.3104e-05	398
GNMT	GSE87340	0.190312	0.0593514	0.610241	0.594495	-2.79075	0.00525853	54
GNMT	GSE8894	0.40095	0.211116	0.761481	0.327266	-2.79259	0.00522882	138
GNMT	OncoSG.LUAD	0.362431	0.171695	0.765053	0.381186	-2.66254	0.00775544	169
GNMT	Roepman.LUAD	0.695467	0.33759	1.43273	0.368758	-0.984854	0.324696	171
GNMT	TCGA.LUAD	0.370586	0.272052	0.504807	0.157703	-6.29457	3.08247e-10	567
MTHFR	ca00182	1.16874	0.877073	1.55739	0.146476	1.06449	0.287106	442
MTHFR	ca00191	0.589755	0.322871	1.07724	0.30738	-1.7179	0.0858143	125
MTHFR	GSE10245	4.21054	0.564216	31.4217	1.02548	1.40187	0.160955	58
MTHFR	GSE1037	0.304877	0.11668	0.79662	0.490045	-2.42396	0.0153524	61
MTHFR	GSE11117	0.240867	0.0559037	1.0378	0.745226	-1.91017	0.0561111	36
MTHFR	GSE11969	0.605036	0.355383	1.03007	0.27148	-1.85085	0.0641917	149
MTHFR	GSE14814	3.47546	1.63253	7.39884	0.385515	3.23133	0.00123215	90
MTHFR	GSE19188	1.39721	0.797832	2.44689	0.285892	1.16995	0.24202	82
MTHFR	GSE29013	1.19101e-08	0	Inf	5353.73	-0.00340807	0.997281	55
MTHFR	GSE30219	0.493074	0.372776	0.652193	0.142697	-4.95522	7.22491e-07	293
MTHFR	GSE31210	0.164313	0.0803482	0.336022	0.365009	-4.94778	7.50659e-07	226
MTHFR	GSE3141	0.263573	0.082298	0.844134	0.59388	-2.24528	0.0247501	111
MTHFR	GSE31547	6.70808e-10	0	Inf	13588.7	-0.00155441	0.99876	30
MTHFR	GSE36471	0.707874	0.429738	1.16603	0.254643	-1.35676	0.174858	115
MTHFR	GSE37745	0.713903	0.511829	0.995757	0.169777	-1.98501	0.0471438	196
MTHFR	GSE41271	0.461534	0.287591	0.740684	0.24134	-3.20377	0.00135639	274
MTHFR	GSE42127	0.40796	0.220518	0.754729	0.313878	-2.85648	0.00428366	176
MTHFR	GSE50081	0.651161	0.392254	1.08096	0.258601	-1.65892	0.0971316	181
MTHFR	GSE5843	2.41398	0.801768	7.26805	0.562364	1.56709	0.117093	48
MTHFR	GSE63459	5.90971	1.72136	20.289	0.629338	2.82296	0.00475825	65
MTHFR	GSE68465	0.829851	0.620319	1.11016	0.148478	-1.25614	0.209065	442
MTHFR	GSE72094	0.557485	0.373502	0.832095	0.204346	-2.85946	0.00424364	398
MTHFR	GSE87340	0.244871	0.0679534	0.882393	0.654047	-2.15126	0.0314556	54
MTHFR	GSE8894	0.655618	0.381316	1.12724	0.27651	-1.52681	0.126809	138
MTHFR	OncoSG.LUAD	0.314156	0.163251	0.604551	0.333984	-3.46683	0.000526634	169
MTHFR	Roepman.LUAD	0.296352	0.0918094	0.956596	0.597885	-2.03418	0.0419331	171
MTHFR	TCGA.LUAD	0.591614	0.441104	0.79348	0.149786	-3.50435	0.000457728	567
MTRR	ca00182	1.28516	0.917128	1.80088	0.172141	1.45742	0.145	442
MTRR	ca00191	0.515535	0.26364	1.0081	0.34216	-1.93638	0.0528212	125
MTRR	GSE10245	0.347848	0.116452	1.03904	0.558318	-1.89138	0.058574	58
MTRR	GSE11117	0.111424	0.0149742	0.829118	1.02401	-2.14296	0.032116	41
MTRR	GSE11969	0.549346	0.34312	0.879522	0.240132	-2.49457	0.0126109	149
MTRR	GSE13213	0.575356	0.324972	1.01865	0.291459	-1.89655	0.0578868	117
MTRR	GSE14814	2.18613	0.961608	4.96996	0.419028	1.86654	0.0619661	90
MTRR	GSE19188	0.54751	0.308489	0.971728	0.292707	-2.05794	0.0395955	82
MTRR	GSE29013	0.445291	0.175536	1.12959	0.47495	-1.70339	0.0884944	55
MTRR	GSE30219	0.660868	0.427798	1.02092	0.221893	-1.86667	0.0619476	293
MTRR	GSE31210	0.5204	0.264455	1.02405	0.345376	-1.89115	0.0586043	226
MTRR	GSE3141	0.54783	0.325426	0.922233	0.265736	-2.26462	0.0235362	111
MTRR	GSE31547	0.120181	0.0147174	0.981395	1.07143	-1.97749	0.047986	30
MTRR	GSE36471	0.393233	0.168001	0.920423	0.433902	-2.15107	0.0314706	115
MTRR	GSE37745	0.662534	0.444889	0.986654	0.203191	-2.02609	0.0427557	196
MTRR	GSE41271	1.45697	0.964888	2.2	0.21026	1.78997	0.0734594	274
MTRR	GSE42127	1.53932	0.862968	2.74578	0.295271	1.46084	0.14406	176
MTRR	GSE50081	0.310515	0.182413	0.52858	0.271414	-4.30901	1.6399e-05	181
MTRR	GSE63459	0.437335	0.115954	1.64947	0.677312	-1.22108	0.222054	65
MTRR	GSE68465	1.36962	1.01775	1.84313	0.151499	2.07612	0.0378829	442
MTRR	GSE72094	0.511591	0.350294	0.747159	0.193244	-3.4683	0.000523759	398
MTRR	GSE87340	0.262969	0.0910217	0.759737	0.541304	-2.46759	0.0136024	54
MTRR	GSE8894	1.73752	1.02428	2.94743	0.269634	2.04893	0.0404688	138
MTRR	OncoSG.LUAD	0.629719	0.278594	1.42338	0.416088	-1.1115	0.266353	169
MTRR	Roepman.LUAD	0.531046	0.256196	1.10076	0.371897	-1.70184	0.0887862	171
MTRR	TCGA.LUAD	0.659534	0.470999	0.923536	0.171777	-2.42304	0.0153913	567
DOT1L	ca00182	1.32793	0.850554	2.07324	0.227295	1.24782	0.212098	442
DOT1L	ca00191	0.39709	0.24637	0.640014	0.243539	-3.79238	0.000149212	125
DOT1L	GSE10245	0.270801	0.0800048	0.916611	0.622103	-2.09993	0.0357352	58
DOT1L	GSE1037	1.87623	0.714614	4.92606	0.492497	1.2777	0.201355	61
DOT1L	GSE11117	2.89453	1.24112	6.75056	0.432051	2.45995	0.0138958	39
DOT1L	GSE11969	2.63949	1.21055	5.75517	0.397718	2.44039	0.0146715	149
DOT1L	GSE13213	0.473545	0.250669	0.894586	0.324554	-2.30319	0.0212684	117
DOT1L	GSE14814	0.525041	0.264846	1.04086	0.349153	-1.84526	0.0649991	90
DOT1L	GSE19188	0.487723	0.278993	0.852614	0.284985	-2.51946	0.0117534	82
DOT1L	GSE29013	2.3048	0.863303	6.15325	0.501022	1.66658	0.0955972	55
DOT1L	GSE30219	2.01036	1.51375	2.66988	0.144758	4.82401	1.40703e-06	293
DOT1L	GSE31210	0.328767	0.100498	1.07552	0.60471	-1.83957	0.0658311	226
DOT1L	GSE3141	1.64885	0.853918	3.18379	0.335718	1.48957	0.136337	111
DOT1L	GSE31547	3.14216	0.812022	12.1587	0.690389	1.65836	0.0972458	30
DOT1L	GSE36471	1.59343	0.946488	2.68257	0.265763	1.75302	0.0795979	115
DOT1L	GSE37745	1.49701	0.995379	2.25144	0.208218	1.93772	0.0526575	196
DOT1L	GSE41271	1.81493	1.24262	2.65082	0.193281	3.08382	0.00204363	274
DOT1L	GSE42127	1.68946	0.978114	2.91816	0.278853	1.88061	0.0600257	176
DOT1L	GSE50081	1.56734	0.957712	2.56502	0.251325	1.78804	0.0737691	181
DOT1L	GSE5843	1.83497	0.784951	4.28956	0.433252	1.40109	0.161187	47
DOT1L	GSE63459	0.334904	0.0979717	1.14483	0.627137	-1.74429	0.0811079	65
DOT1L	GSE68465	1.40853	0.895818	2.21469	0.230905	1.4835	0.137942	442
DOT1L	GSE72094	0.666476	0.445244	0.997633	0.205811	-1.97148	0.0486693	398
DOT1L	GSE87340	0.299496	0.0805858	1.11307	0.669797	-1.80003	0.0718563	54
DOT1L	GSE8894	0.435656	0.257398	0.737365	0.26849	-3.09473	0.00196995	138
DOT1L	OncoSG.LUAD	0.732804	0.399206	1.34518	0.309904	-1.00314	0.315794	169
DOT1L	TCGA.LUAD	0.77961	0.54409	1.11708	0.183513	-1.35664	0.174896	567
MAT2B	ca00182	0.808425	0.623025	1.049	0.132911	-1.60007	0.109583	442
MAT2B	GSE10245	0.435745	0.169524	1.12004	0.481675	-1.7246	0.084599	58
MAT2B	GSE1037	2.38609	0.863389	6.59426	0.518655	1.67675	0.0935912	61
MAT2B	GSE11117	0.429459	0.174903	1.0545	0.458322	-1.84418	0.0651566	41
MAT2B	GSE11969	0.645634	0.407968	1.02175	0.23421	-1.86808	0.0617508	149
MAT2B	GSE13213	1.8614	0.902016	3.8412	0.369626	1.68097	0.0927684	117
MAT2B	GSE14814	1.81744	0.832125	3.96946	0.398579	1.4989	0.133901	90
MAT2B	GSE19188	0.457569	0.26064	0.803289	0.287141	-2.7228	0.00647316	82
MAT2B	GSE29013	0.180463	0.0551226	0.590809	0.605096	-2.82968	0.00465944	55
MAT2B	GSE30219	0.682498	0.510112	0.913139	0.148538	-2.57171	0.0101199	293
MAT2B	GSE31210	1.21566e-08	0	Inf	3967.68	-0.00459346	0.996335	226
MAT2B	GSE3141	1.48615	0.885814	2.49334	0.264003	1.50069	0.133435	111
MAT2B	GSE31547	0.346857	0.0654596	1.83792	0.85077	-1.24457	0.21329	30
MAT2B	GSE36471	0.561294	0.277405	1.13571	0.359581	-1.60607	0.10826	115
MAT2B	GSE37745	1.90061	1.16709	3.09517	0.248814	2.58095	0.00985279	196
MAT2B	GSE41271	0.665482	0.358059	1.23685	0.316238	-1.28778	0.197824	274
MAT2B	GSE42127	1.74644	1.02825	2.96624	0.270269	2.06305	0.0391079	176
MAT2B	GSE50081	1.93444	1.01902	3.67222	0.327035	2.01758	0.0436348	181
MAT2B	GSE5843	4.1498e-09	0	Inf	7263.3	-0.00265722	0.99788	48
MAT2B	GSE63459	0.176675	0.0468477	0.666289	0.677263	-2.55948	0.0104828	65
MAT2B	GSE68465	0.80131	0.617344	1.0401	0.133075	-1.66453	0.0960069	442
MAT2B	GSE72094	0.471206	0.315612	0.703505	0.204484	-3.67981	0.00023341	398
MAT2B	GSE87340	0.422558	0.13222	1.35044	0.592797	-1.45316	0.146179	54
MAT2B	GSE8894	0.361891	0.210388	0.622494	0.276735	-3.67287	0.000239842	138
MAT2B	OncoSG.LUAD	0.507263	0.234463	1.09747	0.393748	-1.72375	0.0847524	169
MAT2B	Roepman.LUAD	0.252786	0.126898	0.50356	0.351619	-3.91109	9.18818e-05	171
MAT2B	TCGA.LUAD	0.696515	0.443059	1.09496	0.230814	-1.56692	0.117134	567
SMYD2	ca00182	1.3405	1.03728	1.73236	0.130839	2.23974	0.0251077	442
SMYD2	GSE10245	4.4103	0.590663	32.9304	1.02576	1.44668	0.147987	58
SMYD2	GSE1037	2.48121	0.822127	7.48837	0.563585	1.61244	0.106867	61
SMYD2	GSE11117	4.92519	0.661511	36.6698	1.0243	1.55654	0.11958	40
SMYD2	GSE11969	2.0666	1.27515	3.34929	0.246352	2.94662	0.00321271	149
SMYD2	GSE13213	5.58032	1.35156	23.04	0.723476	2.37637	0.0174839	117
SMYD2	GSE14814	1.79766	0.950327	3.40051	0.325229	1.80331	0.0713398	90
SMYD2	GSE19188	1.45327	0.805991	2.62038	0.300772	1.24287	0.213918	82
SMYD2	GSE29013	0.233135	0.0823804	0.659767	0.53076	-2.7435	0.00607883	55
SMYD2	GSE30219	2.01031	1.34445	3.00594	0.205259	3.40198	0.00066899	293
SMYD2	GSE31210	2.41539	1.18177	4.93678	0.364727	2.41787	0.0156118	226
SMYD2	GSE3141	1.67431	0.982185	2.85415	0.272135	1.89391	0.0582369	111
SMYD2	GSE31547	4.06246e-09	0	Inf	12567.1	-0.00153746	0.998773	30
SMYD2	GSE36471	0.569754	0.308094	1.05364	0.313679	-1.79339	0.0729098	115
SMYD2	GSE37745	1.50837	0.996319	2.28357	0.211593	1.94254	0.0520722	196
SMYD2	GSE41271	0.569816	0.35287	0.920139	0.244501	-2.30037	0.0214271	274
SMYD2	GSE42127	2.28856	1.15602	4.53066	0.348447	2.37604	0.0174996	176
SMYD2	GSE50081	1.5354	0.841707	2.80079	0.306696	1.39809	0.162085	181
SMYD2	GSE5843	3.07681	0.903952	10.4727	0.624947	1.79838	0.0721163	48
SMYD2	GSE63459	8.07508e+07	0	Inf	7320.35	0.00248716	0.998016	65
SMYD2	GSE68465	1.40786	1.07476	1.8442	0.137745	2.48335	0.0130154	442
SMYD2	GSE72094	0.752976	0.514754	1.10145	0.194057	-1.46205	0.143727	398
SMYD2	GSE87340	2.70092	0.843288	8.65061	0.593908	1.67297	0.0943327	54
SMYD2	GSE8894	0.490268	0.25274	0.951031	0.338064	-2.10848	0.0349893	138
SMYD2	OncoSG.LUAD	2.65505	1.17243	6.01254	0.417039	2.34142	0.0192105	169
SMYD2	Roepman.LUAD	0.633958	0.359076	1.11927	0.290031	-1.57146	0.116075	171
SMYD2	TCGA.LUAD	1.308	0.97329	1.75782	0.150806	1.78044	0.0750035	567
AHCYL1	ca00182	0.709745	0.530882	0.948869	0.148148	-2.31423	0.0206548	442
AHCYL1	ca00191	1.71324	1.06799	2.74835	0.241133	2.23274	0.0255661	125
AHCYL1	GSE10245	2.91581	1.07097	7.93854	0.51102	2.09414	0.0362474	58
AHCYL1	GSE11117	1.70246	0.718278	4.03517	0.440301	1.20844	0.22688	41
AHCYL1	GSE11969	0.704872	0.444812	1.11698	0.234885	-1.48898	0.136492	149
AHCYL1	GSE13213	1.35242	0.769427	2.37716	0.287764	1.04912	0.294124	117
AHCYL1	GSE14814	2.08325	0.86835	4.99793	0.446484	1.6438	0.100217	90
AHCYL1	GSE19188	0.603865	0.25718	1.41789	0.435504	-1.15821	0.246779	82
AHCYL1	GSE29013	0.392661	0.146302	1.05387	0.50372	-1.85581	0.0634806	55
AHCYL1	GSE30219	0.653041	0.485117	0.879091	0.15166	-2.80967	0.00495921	293
AHCYL1	GSE31210	3.05951	1.53987	6.07885	0.350292	3.19235	0.0014112	226
AHCYL1	GSE3141	2.25968	1.06798	4.78116	0.382384	2.13195	0.033011	111
AHCYL1	GSE31547	5.69929	1.47615	22.0044	0.689248	2.52499	0.0115703	30
AHCYL1	GSE36471	0.594443	0.366545	0.964035	0.24669	-2.10844	0.0349928	115
AHCYL1	GSE37745	1.352	0.962022	1.90008	0.173629	1.73697	0.082392	196
AHCYL1	GSE41271	2.15856	1.29825	3.58895	0.259403	2.96619	0.00301511	274
AHCYL1	GSE42127	0.597556	0.357758	0.998085	0.261735	-1.96729	0.0491502	176
AHCYL1	GSE50081	0.632677	0.368109	1.08739	0.276322	-1.65675	0.0975701	181
AHCYL1	GSE63459	2.21039	0.67323	7.25726	0.60656	1.30765	0.190993	65
AHCYL1	GSE68465	0.855518	0.645868	1.13322	0.143427	-1.088	0.276596	442
AHCYL1	GSE72094	0.600572	0.376653	0.95761	0.238045	-2.14192	0.0321997	398
AHCYL1	GSE87340	0.331213	0.103601	1.05889	0.592978	-1.86346	0.0623969	54
AHCYL1	GSE8894	2.93604	1.06041	8.12925	0.519604	2.07285	0.0381858	138
AHCYL1	OncoSG.LUAD	0.351429	0.107744	1.14625	0.603197	-1.73367	0.082976	169
AHCYL1	TCGA.LUAD	0.727392	0.51812	1.02119	0.173095	-1.83882	0.0659421	567
PRMT5	ca00153	0.346943	0.0810142	1.48579	0.742124	-1.42644	0.153742	86
PRMT5	ca00182	1.35024	1.03497	1.76154	0.135671	2.21328	0.0268783	442
PRMT5	GSE10245	1.80098	0.768723	4.21939	0.434374	1.35444	0.175596	58
PRMT5	GSE1037	0.494522	0.196697	1.24329	0.470379	-1.49701	0.13439	61
PRMT5	GSE13213	2.05001	0.987714	4.25482	0.372561	1.92678	0.0540067	117
PRMT5	GSE14814	1.79937	0.851022	3.80453	0.382025	1.53769	0.124123	90
PRMT5	GSE19188	2.05162	1.16208	3.62206	0.290013	2.47791	0.0132154	82
PRMT5	GSE29013	3.35455	1.09953	10.2344	0.569111	2.12668	0.0334467	55
PRMT5	GSE30219	1.98144	1.46876	2.67306	0.152758	4.47649	7.58805e-06	293
PRMT5	GSE31210	2.4177	1.20191	4.86332	0.356591	2.47571	0.013297	226
PRMT5	GSE3141	3.35085	1.51812	7.3961	0.403956	2.99343	0.00275859	111
PRMT5	GSE31547	3.69074e+08	0	Inf	9211.2	0.00214158	0.998291	30
PRMT5	GSE36471	1.5608	0.934229	2.6076	0.261858	1.70015	0.0891024	115
PRMT5	GSE37745	1.51267	0.921849	2.48215	0.252683	1.63793	0.101437	196
PRMT5	GSE41271	1.58889	1.07925	2.33919	0.197334	2.34647	0.0189523	274
PRMT5	GSE42127	2.01587	1.09449	3.71293	0.311622	2.24969	0.0244686	176
PRMT5	GSE50081	1.50791	0.942513	2.41248	0.239764	1.71303	0.0867068	181
PRMT5	GSE5843	2.42164	0.881144	6.65536	0.515815	1.71465	0.0864086	48
PRMT5	GSE63459	2.6858	0.785171	9.18717	0.627476	1.57452	0.115366	65
PRMT5	GSE68465	1.59954	1.22639	2.08621	0.135531	3.46573	0.00052879	442
PRMT5	GSE68571	0.180866	0.0236604	1.38258	1.03775	-1.64779	0.0993948	64
PRMT5	GSE72094	2.2761	1.56529	3.3097	0.191021	4.30563	1.66514e-05	398
PRMT5	GSE87340	4.32171	1.44095	12.9617	0.560393	2.61183	0.00900599	54
PRMT5	GSE8894	1.8672	1.02885	3.38866	0.304084	2.05351	0.0400235	138
PRMT5	OncoSG.LUAD	2.14905	0.840189	5.49688	0.479169	1.59657	0.110362	169
PRMT5	Roepman.LUAD	1.85956	0.787953	4.38853	0.438097	1.41598	0.156781	171
PRMT5	TCGA.LUAD	1.40935	1.0205	1.94637	0.164716	2.08314	0.037238	567
EIF2B1	ca00153	5.2654	2.09132	13.2569	0.471112	3.52604	0.00042183	86
EIF2B1	ca00182	1.52065	1.14518	2.01922	0.144685	2.89689	0.00376881	442
EIF2B1	GSE10245	0.37167	0.136444	1.01242	0.511282	-1.93582	0.0528897	58
EIF2B1	GSE1037	2.22928	0.897094	5.53978	0.464435	1.72614	0.0843215	61
EIF2B1	GSE11117	2.13963	0.940455	4.86788	0.419408	1.81359	0.0697412	41
EIF2B1	GSE11969	1.40144	0.886621	2.2152	0.233596	1.44481	0.148511	149
EIF2B1	GSE13213	2.92855	1.05297	8.14495	0.521893	2.05886	0.0395076	117
EIF2B1	GSE14814	2.54357	1.11615	5.7965	0.420256	2.22143	0.0263217	90
EIF2B1	GSE19188	0.659893	0.261855	1.66297	0.471583	-0.881452	0.378073	82
EIF2B1	GSE29013	3.1928	1.11929	9.10753	0.534808	2.17068	0.0299552	55
EIF2B1	GSE30219	1.94695	1.38365	2.73958	0.174257	3.82346	0.000131594	293
EIF2B1	GSE31210	1.80408	0.908211	3.58363	0.350173	1.68502	0.0919848	226
EIF2B1	GSE3141	0.683985	0.388451	1.20436	0.288664	-1.31578	0.188247	111
EIF2B1	GSE31547	4.44512	1.02105	19.3518	0.750514	1.98772	0.0468431	30
EIF2B1	GSE36471	1.47173	0.670277	3.23147	0.401283	0.963002	0.335546	115
EIF2B1	GSE37745	1.37224	0.97633	1.92868	0.173675	1.82204	0.0684496	196
EIF2B1	GSE41271	1.53069	0.997938	2.34784	0.218259	1.95051	0.0511156	274
EIF2B1	GSE42127	1.8266	1.0653	3.13196	0.275109	2.18988	0.0285329	176
EIF2B1	GSE50081	1.66625	1.05782	2.62463	0.231823	2.20242	0.0276354	181
EIF2B1	GSE5843	4.98676	0.664439	37.4268	1.02839	1.56244	0.118185	47
EIF2B1	GSE63459	0.175963	0.0224401	1.37981	1.05075	-1.65357	0.0982156	65
EIF2B1	GSE68465	1.40624	1.04514	1.8921	0.151415	2.25154	0.0243513	442
EIF2B1	GSE68571	4.09102	1.48392	11.2786	0.517413	2.72277	0.00647375	64
EIF2B1	GSE72094	0.622162	0.421805	0.917689	0.198299	-2.39313	0.0167053	398
EIF2B1	GSE87340	3.84902	1.19972	12.3487	0.594771	2.26611	0.0234445	54
EIF2B1	GSE8894	1.77823	0.865442	3.65372	0.36742	1.56664	0.117198	138
EIF2B1	OncoSG.LUAD	2.79082	1.51817	5.13028	0.310631	3.30403	0.000953063	169
EIF2B1	TCGA.LUAD	1.37916	1.04864	1.81384	0.139786	2.29974	0.0214627	567
DNMT3A	ca00182	1.23792	0.954914	1.6048	0.132434	1.61161	0.107046	442
DNMT3A	GSE10245	0.385721	0.161683	0.920201	0.443619	-2.14743	0.0317591	58
DNMT3A	GSE1037	2.02707	0.793215	5.18023	0.47871	1.47604	0.139934	61
DNMT3A	GSE11117	2.94616	0.872395	9.94949	0.620938	1.74011	0.0818389	41
DNMT3A	GSE11969	1.86689	1.04241	3.34347	0.29732	2.09967	0.0357581	149
DNMT3A	GSE13213	0.309046	0.111097	0.859691	0.521991	-2.24959	0.024475	117
DNMT3A	GSE14814	0.679999	0.311685	1.48355	0.398017	-0.968963	0.332564	90
DNMT3A	GSE19188	1.66201	0.597015	4.62684	0.522379	0.972533	0.330785	82
DNMT3A	GSE29013	0.398011	0.148972	1.06337	0.501398	-1.83742	0.0661485	55
DNMT3A	GSE30219	2.2522	1.54908	3.27446	0.190945	4.25205	2.11819e-05	293
DNMT3A	GSE31210	1.78211	0.916049	3.46696	0.339538	1.70171	0.0888089	226
DNMT3A	GSE3141	0.681194	0.373089	1.24374	0.307163	-1.24985	0.211354	111
DNMT3A	GSE31547	2.19415	0.584221	8.24052	0.67515	1.16388	0.244473	30
DNMT3A	GSE36471	1.58439	0.971289	2.58449	0.249662	1.84328	0.0652881	115
DNMT3A	GSE37745	0.710851	0.509116	0.992523	0.170303	-2.00403	0.0450667	196
DNMT3A	GSE41271	1.59822	0.943342	2.70774	0.268995	1.74313	0.0813103	274
DNMT3A	GSE42127	0.651349	0.396317	1.07049	0.25349	-1.69123	0.0907922	176
DNMT3A	GSE50081	2.0084	1.2736	3.16712	0.232395	3.00065	0.00269401	181
DNMT3A	GSE5843	0.387886	0.15481	0.971876	0.468639	-2.02084	0.0432967	47
DNMT3A	GSE63459	3.98717e+08	0	Inf	7677.52	0.00257945	0.997942	65
DNMT3A	GSE68465	0.789561	0.602163	1.03528	0.138242	-1.70916	0.0874216	442
DNMT3A	GSE72094	2.1571	1.39785	3.32876	0.221347	3.47313	0.00051443	398
DNMT3A	GSE87340	5.50523	1.71633	17.6583	0.594658	2.86837	0.00412596	54
DNMT3A	GSE8894	2.16229	1.2076	3.87172	0.297215	2.59465	0.0094687	138
DNMT3A	OncoSG.LUAD	1.70731	0.838111	3.47794	0.363029	1.47349	0.140619	169
DNMT3A	Roepman.LUAD	0.619099	0.344923	1.11121	0.298446	-1.60662	0.108137	171
DNMT3A	TCGA.LUAD	1.2964	0.985675	1.70507	0.139807	1.85676	0.0633455	567
BHMT2	ca00182	1.44712	1.06518	1.96601	0.156344	2.36386	0.0180855	442
BHMT2	GSE10245	1.77558	0.692139	4.55501	0.480671	1.19443	0.232308	58
BHMT2	GSE1037	3.82025	0.510712	28.5765	1.02669	1.30548	0.19173	61
BHMT2	GSE11117	1.66194	0.729672	3.78533	0.41998	1.20955	0.226452	41
BHMT2	GSE11969	0.793023	0.500561	1.25636	0.234761	-0.987827	0.323237	149
BHMT2	GSE13213	1.77694	0.985299	3.20464	0.300875	1.91074	0.0560378	117
BHMT2	GSE14814	3.24177	1.62866	6.45259	0.351212	3.34875	0.000811778	90
BHMT2	GSE19188	1.72684	0.88098	3.38483	0.34338	1.59093	0.111626	82
BHMT2	GSE29013	3.65509	1.00621	13.2772	0.65814	1.96937	0.0489103	55
BHMT2	GSE30219	0.750323	0.567954	0.991252	0.142076	-2.02181	0.0431961	293
BHMT2	GSE31210	0.263634	0.133814	0.519397	0.34598	-3.85339	0.000116495	226
BHMT2	GSE3141	0.606856	0.358253	1.02797	0.268909	-1.85737	0.0632581	111
BHMT2	GSE31547	0.508343	0.121133	2.1333	0.731783	-0.92459	0.355179	30
BHMT2	GSE36471	0.469692	0.267266	0.825435	0.287675	-2.62684	0.00861811	115
BHMT2	GSE37745	0.607564	0.417408	0.884348	0.191531	-2.60166	0.00927739	196
BHMT2	GSE41271	1.30598	0.916066	1.86187	0.180933	1.47544	0.140094	274
BHMT2	GSE42127	2.26022	1.10858	4.60824	0.363469	2.24355	0.0248612	176
BHMT2	GSE50081	0.704939	0.410487	1.21061	0.275906	-1.26726	0.205063	181
BHMT2	GSE5843	1.74496	0.7143	4.26276	0.455715	1.22167	0.221833	48
BHMT2	GSE63459	2.95719	0.782902	11.1699	0.678067	1.59901	0.109817	65
BHMT2	GSE68465	1.45057	1.06305	1.97936	0.158584	2.34549	0.0190022	442
BHMT2	GSE72094	0.654503	0.45245	0.946788	0.18837	-2.25024	0.0244334	398
BHMT2	GSE87340	0.312984	0.0870956	1.12473	0.652638	-1.77986	0.0750989	54
BHMT2	GSE8894	0.400726	0.195363	0.821967	0.366548	-2.49483	0.0126016	138
BHMT2	OncoSG.LUAD	0.35792	0.179363	0.714232	0.352505	-2.9147	0.00356035	169
BHMT2	Roepman.LUAD	3.2521	1.00849	10.4871	0.59738	1.97412	0.0483678	171
BHMT2	TCGA.LUAD	0.674453	0.48191	0.943924	0.171505	-2.29645	0.02165	567
SUV39H2	ca00182	1.36559	1.04566	1.7834	0.136196	2.28778	0.0221501	442
SUV39H2	GSE10245	0.247313	0.0331367	1.84581	1.02554	-1.36231	0.1731	58
SUV39H2	GSE1037	2.63391	1.07503	6.45328	0.457213	2.1182	0.0341583	61
SUV39H2	GSE11117	0.318135	0.124542	0.812653	0.478493	-2.39351	0.0166878	38
SUV39H2	GSE11969	1.67426	1.04189	2.69044	0.242011	2.12953	0.0332104	149
SUV39H2	GSE13213	2.83029	1.58161	5.0648	0.296912	3.504	0.000458329	117
SUV39H2	GSE14814	1.34104	0.650923	2.76283	0.368787	0.795706	0.426203	90
SUV39H2	GSE19188	1.69886	0.898159	3.21339	0.325194	1.62968	0.10317	82
SUV39H2	GSE29013	3.11555	1.14217	8.49844	0.511987	2.2196	0.0264459	55
SUV39H2	GSE30219	2.35751	1.66539	3.33728	0.177324	4.8364	1.32212e-06	293
SUV39H2	GSE31210	2.55735	1.25082	5.22859	0.364889	2.57331	0.0100732	226
SUV39H2	GSE3141	4.09907	0.999937	16.8035	0.719821	1.95988	0.0500102	111
SUV39H2	GSE31547	11.3156	2.23094	57.3938	0.828463	2.92853	0.00340569	30
SUV39H2	GSE36471	2.19176	1.00055	4.80114	0.400084	1.96134	0.049839	115
SUV39H2	GSE37745	1.52508	0.996226	2.33469	0.217264	1.94256	0.0520691	196
SUV39H2	GSE41271	1.42225	0.959661	2.10783	0.200726	1.75483	0.0792878	274
SUV39H2	GSE42127	1.36473	0.830354	2.24301	0.253505	1.22663	0.21996	176
SUV39H2	GSE50081	1.25346	0.755373	2.07997	0.258397	0.874259	0.381977	181
SUV39H2	GSE5843	0.52822	0.231009	1.20782	0.421976	-1.51251	0.130404	48
SUV39H2	GSE63459	0.30593	0.0892958	1.04812	0.628277	-1.88516	0.0594088	65
SUV39H2	GSE68465	1.3219	0.998057	1.75082	0.143377	1.9464	0.0516071	442
SUV39H2	GSE72094	1.8607	1.2858	2.69265	0.188561	3.29311	0.000990841	398
SUV39H2	GSE87340	7.73019	2.64341	22.6055	0.547491	3.73546	0.000187369	54
SUV39H2	GSE8894	1.69369	0.995826	2.88061	0.27097	1.94453	0.0518319	138
SUV39H2	OncoSG.LUAD	2.52098	1.35464	4.69154	0.316901	2.91779	0.00352526	169
SUV39H2	Roepman.LUAD	0.379755	0.211141	0.683023	0.299496	-3.23286	0.00122559	171
SUV39H2	TCGA.LUAD	1.45805	1.09444	1.94247	0.146359	2.57655	0.00997919	567
NNMT	ca00153	2.29689	0.783996	6.72926	0.548433	1.51624	0.129458	86
NNMT	ca00182	0.850805	0.658542	1.0992	0.130693	-1.23627	0.216358	442
NNMT	ca00191	1.76057	0.900691	3.44138	0.341962	1.6541	0.0981064	125
NNMT	GSE10245	1.97997	0.583228	6.72172	0.623614	1.09536	0.273358	58
NNMT	GSE1037	0.578021	0.23775	1.40529	0.453269	-1.20932	0.226541	61
NNMT	GSE11117	0.515722	0.218293	1.2184	0.438645	-1.50962	0.13114	41
NNMT	GSE11969	0.496193	0.272498	0.90352	0.305789	-2.29175	0.02192	149
NNMT	GSE13213	0.614715	0.220975	1.71004	0.522005	-0.932167	0.35125	117
NNMT	GSE14814	0.315994	0.0971309	1.02802	0.60188	-1.91406	0.0556128	90
NNMT	GSE19188	0.636215	0.362533	1.11651	0.286955	-1.57592	0.115044	82
NNMT	GSE29013	1.95908	0.732996	5.23602	0.501585	1.3407	0.180019	55
NNMT	GSE30219	1.56372	0.973597	2.51155	0.241753	1.84928	0.0644172	293
NNMT	GSE31210	3.67271	0.880309	15.3228	0.728794	1.78504	0.0742545	226
NNMT	GSE3141	2.43469	1.4479	4.09402	0.265161	3.35578	0.000791418	111
NNMT	GSE31547	3.80817e-09	0	Inf	11040.3	-0.00175594	0.998599	30
NNMT	GSE36471	2.38138	1.27782	4.43803	0.317623	2.7318	0.00629896	115
NNMT	GSE37745	2.10855	1.29854	3.42385	0.247333	3.01618	0.00255977	196
NNMT	GSE41271	0.759654	0.470239	1.22719	0.24471	-1.12334	0.261294	274
NNMT	GSE42127	1.37908	0.839143	2.26644	0.25347	1.26807	0.204772	176
NNMT	GSE50081	1.83874	1.05524	3.20399	0.283329	2.14973	0.0315766	181
NNMT	GSE5843	0.469401	0.138617	1.58955	0.622331	-1.21527	0.224265	48
NNMT	GSE63459	2.71157	0.786505	9.34846	0.631483	1.57966	0.114185	65
NNMT	GSE72094	1.76825	1.20752	2.58936	0.194607	2.92892	0.00340142	398
NNMT	GSE87340	0.126933	0.0283265	0.568793	0.765249	-2.69729	0.00699063	54
NNMT	GSE8894	1.74628	0.950709	3.20758	0.310226	1.79703	0.0723315	138
NNMT	OncoSG.LUAD	3.39989	1.70289	6.78803	0.35277	3.46895	0.00052249	169
NNMT	Roepman.LUAD	0.350575	0.168101	0.731123	0.375011	-2.79507	0.00518886	171
NNMT	TCGA.LUAD	1.40848	0.92704	2.13995	0.213408	1.60497	0.108501	567
MSRA	ca00182	0.683653	0.504296	0.926799	0.155251	-2.44961	0.0143011	442
MSRA	GSE10245	3.07294	0.412991	22.8648	1.02398	1.09634	0.272929	58
MSRA	GSE1037	3.49352	1.25513	9.72381	0.522289	2.39505	0.0166179	61
MSRA	GSE11117	0.220306	0.0296278	1.63816	1.02365	-1.47779	0.139463	41
MSRA	GSE11969	0.616447	0.382168	0.994347	0.24394	-1.98321	0.0473445	149
MSRA	GSE13213	0.389938	0.218888	0.694656	0.294611	-3.19664	0.00139039	117
MSRA	GSE14814	1.57603	0.721689	3.44174	0.398512	1.14152	0.253656	90
MSRA	GSE19188	0.413811	0.21773	0.786478	0.327636	-2.69307	0.00707982	82
MSRA	GSE29013	3.59431e-09	0	Inf	7081.42	-0.00274576	0.997809	55
MSRA	GSE30219	0.596219	0.406058	0.875434	0.195979	-2.63879	0.0083203	293
MSRA	GSE31210	2.26491	1.02747	4.99267	0.40329	2.02717	0.0426453	226
MSRA	GSE3141	0.383575	0.153216	0.960277	0.468216	-2.04653	0.0407038	111
MSRA	GSE31547	3.72505e-09	0	Inf	10493.3	-0.00184958	0.998524	30
MSRA	GSE36471	1.78069	1.00874	3.14337	0.289951	1.98999	0.0465924	115
MSRA	GSE37745	0.627732	0.452749	0.870346	0.166726	-2.79286	0.00522447	196
MSRA	GSE41271	0.590844	0.411063	0.849252	0.185108	-2.84269	0.00447347	274
MSRA	GSE42127	0.559136	0.335844	0.930887	0.260079	-2.23533	0.0253956	176
MSRA	GSE50081	0.515849	0.208136	1.2785	0.463082	-1.42942	0.152883	181
MSRA	GSE5843	0.434681	0.160641	1.17621	0.507887	-1.64041	0.100921	48
MSRA	GSE63459	0.244056	0.0743005	0.801653	0.606786	-2.32431	0.020109	65
MSRA	GSE68465	0.657614	0.456965	0.946365	0.185723	-2.25679	0.0240215	442
MSRA	GSE72094	0.592806	0.409037	0.859137	0.18932	-2.76192	0.00574619	398
MSRA	GSE87340	0.202333	0.067398	0.607418	0.560878	-2.84882	0.00438822	54
MSRA	GSE8894	0.455278	0.234448	0.884109	0.338615	-2.32373	0.0201402	138
MSRA	OncoSG.LUAD	1.3841	0.675809	2.83474	0.365771	0.88868	0.374175	169
MSRA	Roepman.LUAD	4.20645	2.31136	7.65535	0.305508	4.70239	2.57129e-06	171
MSRA	TCGA.LUAD	0.728901	0.550528	0.965067	0.143196	-2.20828	0.0272246	567
PRMT3	ca00182	1.51621	1.12692	2.03997	0.151392	2.74924	0.00597344	442
PRMT3	ca00191	1.73609	0.976677	3.08598	0.293492	1.87956	0.0601687	125
PRMT3	GSE10245	2.9216	0.681489	12.5251	0.74267	1.44362	0.148847	58
PRMT3	GSE1037	2.26074	0.748814	6.8254	0.563764	1.44687	0.147933	61
PRMT3	GSE13213	2.55222	1.0842	6.00797	0.436805	2.14504	0.0319494	117
PRMT3	GSE14814	2.33323	1.21614	4.47643	0.33244	2.54859	0.0108159	90
PRMT3	GSE19188	1.38919	0.794272	2.42971	0.285235	1.15246	0.249133	82
PRMT3	GSE29013	4.46448	1.55706	12.8008	0.537434	2.78388	0.00537126	55
PRMT3	GSE30219	1.96581	1.48698	2.59882	0.142429	4.74554	2.0795e-06	293
PRMT3	GSE31210	2.36004	1.07041	5.20344	0.403395	2.12863	0.0332846	226
PRMT3	GSE3141	0.450156	0.220578	0.918678	0.363956	-2.19301	0.0283064	111
PRMT3	GSE31547	3.24778e-09	0	Inf	9365.07	-0.00208704	0.998335	30
PRMT3	GSE36471	1.63002	1.00518	2.64327	0.246651	1.9809	0.0476027	115
PRMT3	GSE37745	1.43433	0.958553	2.14625	0.205629	1.75411	0.0794125	196
PRMT3	GSE41271	1.82362	1.18123	2.81534	0.221567	2.71169	0.00669402	274
PRMT3	GSE42127	1.82505	1.08701	3.06419	0.264381	2.27553	0.0228743	176
PRMT3	GSE50081	0.66022	0.41514	1.04998	0.236717	-1.75392	0.0794448	181
PRMT3	GSE5843	1.64027	0.48687	5.52611	0.619716	0.798531	0.424562	48
PRMT3	GSE68465	1.42035	1.09713	1.83879	0.131739	2.66362	0.00773053	442
PRMT3	GSE72094	1.89155	1.24976	2.86291	0.211454	3.01435	0.00257534	398
PRMT3	GSE87340	2.24929	0.702798	7.19879	0.593531	1.36575	0.172018	54
PRMT3	OncoSG.LUAD	2.10683	1.12572	3.94304	0.319784	2.33028	0.0197915	169
PRMT3	Roepman.LUAD	0.495035	0.258226	0.949012	0.332044	-2.11757	0.0342112	171
PRMT3	TCGA.LUAD	1.42503	0.994951	2.04103	0.183298	1.93235	0.0533163	567
CARM1	ca00182	0.643695	0.490021	0.845561	0.139174	-3.16533	0.00154908	442
CARM1	ca00191	1.48238	0.887535	2.47589	0.261716	1.5041	0.132556	125
CARM1	GSE10245	0.415511	0.16227	1.06396	0.479726	-1.83073	0.0671414	58
CARM1	GSE1037	0.237226	0.0890647	0.631859	0.499831	-2.87845	0.00399633	61
CARM1	GSE14814	0.172427	0.0236408	1.25761	1.01379	-1.73387	0.0829419	90
CARM1	GSE19188	2.08049	1.19218	3.63071	0.284098	2.57871	0.00991714	82
CARM1	GSE29013	2.74561	0.793789	9.49669	0.633144	1.59522	0.110664	55
CARM1	GSE30219	2.13296	1.52533	2.98265	0.171074	4.42798	9.51218e-06	293
CARM1	GSE31210	11.1673	1.52817	81.6067	1.01477	2.37786	0.0174132	226
CARM1	GSE3141	0.687462	0.403313	1.17181	0.272094	-1.37728	0.168426	111
CARM1	GSE31547	0.423514	0.103978	1.72502	0.716547	-1.19904	0.230512	30
CARM1	GSE37745	1.64753	1.18267	2.29512	0.169138	2.9519	0.00315827	196
CARM1	GSE41271	1.29581	0.904042	1.85736	0.183686	1.41077	0.158312	274
CARM1	GSE42127	1.41331	0.861176	2.31944	0.252755	1.36866	0.171107	176
CARM1	GSE50081	1.70326	1.02816	2.82162	0.257541	2.06779	0.0386596	181
CARM1	GSE5843	0.298535	0.124239	0.717352	0.447294	-2.70263	0.00687937	48
CARM1	GSE63459	0.295255	0.0637531	1.3674	0.782067	-1.55986	0.118793	65
CARM1	GSE68465	0.654671	0.504678	0.849242	0.132763	-3.19081	0.00141875	442
CARM1	GSE72094	0.541268	0.273699	1.07041	0.347908	-1.76438	0.0776684	398
CARM1	GSE87340	2.43509e+08	0	Inf	9057.65	0.00213197	0.998299	54
CARM1	GSE8894	2.16154	1.08878	4.29125	0.349883	2.20308	0.0275891	138
CARM1	OncoSG.LUAD	0.468197	0.229755	0.954098	0.36321	-2.08934	0.0366776	169
CARM1	Roepman.LUAD	2.18281	1.23149	3.86902	0.292039	2.67298	0.00751811	171
CARM1	TCGA.LUAD	1.29791	0.955012	1.76394	0.156528	1.66589	0.0957355	567
ADI1	ca00182	0.704429	0.505644	0.981364	0.169164	-2.07117	0.0383429	442
ADI1	GSE10245	3.32239	1.42897	7.72465	0.430483	2.78915	0.00528459	58
ADI1	GSE1037	0.322264	0.10757	0.965453	0.55982	-2.02277	0.0430972	61
ADI1	GSE11117	3.01626	1.0128	8.98285	0.556795	1.98281	0.0473887	41
ADI1	GSE13213	1.74304	0.540687	5.61912	0.597227	0.93035	0.35219	117
ADI1	GSE14814	1.6583	0.692863	3.96896	0.44527	1.13592	0.255991	90
ADI1	GSE19188	0.454464	0.201535	1.02482	0.414882	-1.90087	0.057319	82
ADI1	GSE29013	0.128108	0.028354	0.578814	0.769456	-2.67056	0.00757244	55
ADI1	GSE30219	1.88826	1.24038	2.87455	0.214412	2.96464	0.00303035	293
ADI1	GSE31210	0.316762	0.157508	0.637038	0.356475	-3.22492	0.00126007	226
ADI1	GSE3141	1.76487	0.835051	3.73002	0.381812	1.48784	0.136793	111
ADI1	GSE31547	3.05254	0.816685	11.4096	0.672705	1.65894	0.0971282	30
ADI1	GSE36471	0.641522	0.391521	1.05116	0.251946	-1.76194	0.0780802	115
ADI1	GSE37745	1.30109	0.858489	1.97188	0.212139	1.24071	0.214712	196
ADI1	GSE41271	1.67378	0.98709	2.83817	0.269432	1.91174	0.05591	274
ADI1	GSE42127	3.16164	1.3628	7.33484	0.429368	2.68089	0.00734257	176
ADI1	GSE50081	0.356635	0.154612	0.82263	0.426433	-2.41783	0.0156134	181
ADI1	GSE5843	0.385959	0.147953	1.00684	0.489211	-1.94604	0.05165	48
ADI1	GSE63459	2.62782	0.566769	12.1839	0.782646	1.23447	0.217027	65
ADI1	GSE68465	0.693219	0.487375	0.986002	0.179755	-2.03839	0.0415113	442
ADI1	GSE72094	0.552399	0.353909	0.86221	0.227162	-2.61261	0.00898539	398
ADI1	GSE87340	0.28478	0.0952639	0.851314	0.558717	-2.24808	0.0245712	54
ADI1	GSE8894	0.576414	0.322447	1.03041	0.296376	-1.85889	0.0630432	138
ADI1	OncoSG.LUAD	2.71492	1.06293	6.93442	0.478445	2.08752	0.0368414	169
ADI1	Roepman.LUAD	0.542933	0.254362	1.15888	0.386858	-1.5788	0.114383	171
ADI1	TCGA.LUAD	0.66072	0.437957	0.996788	0.209804	-1.9753	0.0482344	567
PRMT7	ca00182	0.693782	0.514536	0.935471	0.152499	-2.39738	0.016513	442
PRMT7	GSE10245	3.85464	0.899573	16.517	0.742418	1.81741	0.0691544	58
PRMT7	GSE1037	0.231636	0.0771424	0.695538	0.560988	-2.60716	0.00912964	61
PRMT7	GSE11117	2.8529	1.05529	7.71262	0.507418	2.06603	0.0388261	41
PRMT7	GSE11969	1.865	1.13115	3.07495	0.255119	2.44302	0.0145648	149
PRMT7	GSE13213	3.07762	0.954818	9.91997	0.59715	1.88254	0.0597629	117
PRMT7	GSE14814	1.66462	0.879667	3.15001	0.325418	1.56597	0.117355	90
PRMT7	GSE19188	1.42943	0.69408	2.94387	0.368602	0.969279	0.332406	82
PRMT7	GSE29013	0.188673	0.0712797	0.499405	0.496643	-3.35803	0.000785012	55
PRMT7	GSE30219	0.781167	0.573583	1.06388	0.157598	-1.56706	0.1171	293
PRMT7	GSE31210	1.57236	0.799172	3.0936	0.345291	1.31072	0.189953	226
PRMT7	GSE3141	0.515807	0.252209	1.05491	0.365045	-1.81354	0.0697491	111
PRMT7	GSE31547	4.16856	0.829489	20.9489	0.823748	1.73302	0.0830923	30
PRMT7	GSE36471	1.6936	1.01218	2.83377	0.262633	2.00606	0.0448498	115
PRMT7	GSE37745	0.789872	0.569784	1.09497	0.166642	-1.41551	0.156919	196
PRMT7	GSE41271	1.45221	0.974286	2.16458	0.203646	1.83204	0.0669448	274
PRMT7	GSE42127	1.5189	0.924148	2.49642	0.25351	1.6488	0.0991889	176
PRMT7	GSE50081	0.710923	0.42605	1.18627	0.261233	-1.30608	0.191527	181
PRMT7	GSE5843	0.215142	0.0694541	0.666424	0.576863	-2.66347	0.00773383	48
PRMT7	GSE63459	0.12467	0.0321931	0.482796	0.690789	-3.01406	0.00257773	65
PRMT7	GSE68465	0.7141	0.5363	0.950846	0.146089	-2.30498	0.0211676	442
PRMT7	GSE72094	0.621804	0.415599	0.93032	0.205567	-2.31132	0.0208153	398
PRMT7	GSE87340	2.6528e+08	0	Inf	8284.96	0.00234114	0.998132	54
PRMT7	GSE8894	3.69697	0.900262	15.1818	0.720719	1.81418	0.0696502	138
PRMT7	OncoSG.LUAD	0.288125	0.144131	0.575977	0.35341	-3.521	0.000429916	169
PRMT7	TCGA.LUAD	0.585541	0.413673	0.828814	0.177279	-3.01908	0.00253542	567
MSRB2	ca00182	0.748027	0.528092	1.05956	0.177641	-1.63429	0.102199	442
MSRB2	GSE10245	0.224062	0.0300816	1.66892	1.02451	-1.46004	0.144278	58
MSRB2	GSE1037	0.252025	0.0711805	0.892329	0.645067	-2.13657	0.0326333	55
MSRB2	GSE13213	0.642926	0.366687	1.12727	0.286495	-1.54182	0.123117	117
MSRB2	GSE14814	1.35049	0.707048	2.5795	0.330173	0.910039	0.362802	90
MSRB2	GSE19188	1.99315	1.0817	3.67259	0.311833	2.21181	0.0269797	82
MSRB2	GSE29013	1.99405	0.784668	5.06743	0.475858	1.45037	0.146955	55
MSRB2	GSE30219	0.56564	0.42658	0.75003	0.14396	-3.95803	7.5569e-05	293
MSRB2	GSE31210	0.457613	0.23033	0.909173	0.350268	-2.23181	0.0256273	226
MSRB2	GSE3141	0.489285	0.253418	0.944684	0.335672	-2.12949	0.0332139	111
MSRB2	GSE31547	0.152059	0.0189637	1.21927	1.06213	-1.77331	0.0761778	30
MSRB2	GSE36471	1.99001	1.1529	3.43492	0.278504	2.47084	0.0134797	115
MSRB2	GSE37745	0.656241	0.441655	0.975089	0.202044	-2.08482	0.0370854	196
MSRB2	GSE41271	0.456346	0.291393	0.714678	0.228872	-3.4277	0.000608725	274
MSRB2	GSE42127	0.650218	0.393921	1.07327	0.255698	-1.68343	0.0922928	176
MSRB2	GSE50081	1.26911	0.79706	2.02073	0.237322	1.00419	0.315286	181
MSRB2	GSE5843	9.27302	1.24767	68.9195	1.0234	2.17618	0.0295416	48
MSRB2	GSE63459	11.4762	1.45678	90.4074	1.0531	2.31722	0.0204916	65
MSRB2	GSE68465	0.733026	0.557352	0.964072	0.139791	-2.22171	0.0263032	442
MSRB2	GSE72094	0.391662	0.15964	0.96091	0.457907	-2.04704	0.0406537	398
MSRB2	GSE87340	4.12682	1.27632	13.3436	0.598749	2.36745	0.0179112	54
MSRB2	GSE8894	0.455678	0.228522	0.908632	0.352126	-2.23207	0.0256103	138
MSRB2	OncoSG.LUAD	2.49782	0.7697	8.10587	0.600609	1.52415	0.127472	169
MSRB2	Roepman.LUAD	2.17157	1.13179	4.16661	0.332481	2.33231	0.0196842	171
MSRB2	TCGA.LUAD	1.29647	0.955514	1.75909	0.155693	1.66768	0.0953789	567
DNMT3B	ca00182	1.52461	1.13834	2.04195	0.149067	2.8292	0.0046664	442
DNMT3B	GSE10245	0.452688	0.193204	1.06068	0.434426	-1.82437	0.0680966	58
DNMT3B	GSE1037	2.87594	1.08478	7.62464	0.49746	2.12355	0.0337081	61
DNMT3B	GSE11117	2.77324	0.914808	8.4071	0.565857	1.80261	0.0714499	22
DNMT3B	GSE11969	2.82938	1.03182	7.75857	0.514672	2.02082	0.0432985	149
DNMT3B	GSE13213	1.96601	1.02354	3.77631	0.333037	2.02982	0.0423746	117
DNMT3B	GSE14814	1.81891	0.760362	4.35115	0.445009	1.34433	0.178841	90
DNMT3B	GSE19188	2.22512	0.992293	4.98963	0.412022	1.94119	0.0522358	82
DNMT3B	GSE29013	2.39892	0.95042	6.05501	0.472391	1.85232	0.0639803	55
DNMT3B	GSE30219	2.38514	1.8004	3.15979	0.143497	6.05765	1.38129e-09	293
DNMT3B	GSE31210	4.51298	0.61711	33.0039	1.01515	1.48446	0.137686	226
DNMT3B	GSE3141	1.61216	0.905296	2.87096	0.294429	1.62204	0.104794	111
DNMT3B	GSE31547	2.54943e+08	0	Inf	11353.9	0.00170483	0.99864	30
DNMT3B	GSE36471	0.671626	0.378485	1.19181	0.29262	-1.36031	0.173733	115
DNMT3B	GSE37745	1.79613	1.1639	2.77177	0.221359	2.64563	0.00815393	196
DNMT3B	GSE41271	2.21239	1.43382	3.41371	0.221294	3.58832	0.000332818	274
DNMT3B	GSE42127	1.59092	0.927206	2.72974	0.275461	1.68559	0.0918747	176
DNMT3B	GSE50081	1.68244	1.03908	2.72413	0.245875	2.11588	0.0343549	181
DNMT3B	GSE5843	0.281446	0.0948492	0.835133	0.554935	-2.28462	0.022335	48
DNMT3B	GSE63459	0.471864	0.125089	1.77998	0.677393	-1.10876	0.267535	65
DNMT3B	GSE68465	1.73149	1.10497	2.71324	0.22917	2.39551	0.0165971	442
DNMT3B	GSE72094	1.70964	1.17686	2.48363	0.190532	2.81467	0.00488267	398
DNMT3B	GSE87340	3.88014	1.34208	11.2181	0.54167	2.50313	0.0123099	54
DNMT3B	GSE8894	1.35023	0.763345	2.38834	0.290985	1.03193	0.302105	138
DNMT3B	OncoSG.LUAD	0.394257	0.182472	0.851847	0.39307	-2.3679	0.0178893	169
DNMT3B	TCGA.LUAD	1.36576	1.02912	1.81254	0.144398	2.15873	0.0308715	567
MARS	ca00153	2.41227	1.0479	5.55304	0.425406	2.06995	0.0384575	86
MARS	ca00182	1.45823	1.08532	1.95928	0.150693	2.50327	0.0123052	442
MARS	ca00191	1.66048	1.03816	2.65585	0.239624	2.11627	0.0343219	125
MARS	GSE10245	0.344048	0.0803286	1.47356	0.742184	-1.43762	0.150543	58
MARS	GSE1037	0.429704	0.0988199	1.86851	0.749911	-1.12635	0.260019	61
MARS	GSE11117	0.301494	0.0998901	0.909988	0.563623	-2.12732	0.0333937	36
MARS	GSE11969	1.87312	0.859497	4.08211	0.397462	1.57903	0.11433	149
MARS	GSE13213	0.642405	0.34944	1.18099	0.310663	-1.42449	0.154305	117
MARS	GSE14814	3.77477	1.63842	8.69671	0.425827	3.11943	0.001812	90
MARS	GSE19188	2.22096	0.79793	6.18179	0.522291	1.52776	0.126571	82
MARS	GSE29013	2.48233	0.813528	7.57439	0.569181	1.59738	0.110181	55
MARS	GSE30219	1.84167	1.39306	2.43474	0.142435	4.28735	1.80818e-05	293
MARS	GSE31210	4.48941	1.86241	10.8219	0.448912	3.34524	0.000822104	226
MARS	GSE3141	1.58777	0.945091	2.66749	0.264702	1.74661	0.0807044	111
MARS	GSE31547	2.68453e+08	0	Inf	10493.3	0.00184958	0.998524	30
MARS	GSE36471	1.8014	0.886536	3.66037	0.361741	1.62704	0.103729	115
MARS	GSE37745	1.7389	0.959289	3.1521	0.303483	1.82301	0.0683018	196
MARS	GSE41271	2.46438	1.28929	4.71045	0.330539	2.72869	0.0063586	274
MARS	GSE42127	3.09362	0.966693	9.90022	0.593488	1.90289	0.0570553	176
MARS	GSE5843	2.18837	0.808696	5.92182	0.507911	1.54191	0.123095	48
MARS	GSE63459	2.46877	0.72224	8.4388	0.627113	1.44108	0.149561	65
MARS	GSE72094	2.01458	1.12987	3.59203	0.295061	2.37378	0.0176071	398
MARS	GSE87340	7.91537	1.03478	60.5474	1.03809	1.9929	0.0462729	54
MARS	GSE8894	1.50627	0.888679	2.55306	0.269217	1.52158	0.128113	138
MARS	OncoSG.LUAD	2.01367	1.07034	3.78841	0.322447	2.17078	0.029948	169
MARS	Roepman.LUAD	0.512446	0.228235	1.15057	0.412672	-1.62008	0.105216	171
MARS	TCGA.LUAD	1.19696	0.912345	1.57035	0.138532	1.29776	0.194372	567
MTHFD2L	ca00182	1.30646	1.01074	1.6887	0.13094	2.04155	0.0411959	442
MTHFD2L	GSE10245	3.29232	1.40344	7.72341	0.435041	2.73904	0.00616194	58
MTHFD2L	GSE1037	3.57515	1.28234	9.96747	0.523132	2.43535	0.0148775	61
MTHFD2L	GSE13213	2.56048	0.791595	8.28209	0.59894	1.56977	0.116469	102
MTHFD2L	GSE14814	2.16865	1.05131	4.47352	0.369431	2.0954	0.0361354	90
MTHFD2L	GSE19188	0.529173	0.256179	1.09308	0.37013	-1.71951	0.0855224	82
MTHFD2L	GSE29013	0.246966	0.0873366	0.698357	0.530357	-2.63691	0.00836644	55
MTHFD2L	GSE30219	1.50644	0.982194	2.31049	0.218225	1.87763	0.0604314	293
MTHFD2L	GSE31210	0.490454	0.213979	1.12415	0.423198	-1.68343	0.0922921	226
MTHFD2L	GSE3141	0.34448	0.182532	0.650112	0.324042	-3.28884	0.00100603	111
MTHFD2L	GSE31547	0.108581	0.0134886	0.874065	1.06413	-2.08645	0.0369377	30
MTHFD2L	GSE36471	0.74221	0.395849	1.39163	0.32072	-0.929544	0.352607	115
MTHFD2L	GSE37745	0.625791	0.396131	0.988597	0.233306	-2.00912	0.0445243	196
MTHFD2L	GSE41271	0.609394	0.327874	1.13263	0.316248	-1.56614	0.117315	274
MTHFD2L	GSE42127	0.508011	0.249962	1.03246	0.361839	-1.87169	0.0612491	176
MTHFD2L	GSE50081	0.561477	0.257244	1.22551	0.398244	-1.44932	0.147247	181
MTHFD2L	GSE5843	1.96049	0.574677	6.68817	0.626105	1.07521	0.282279	48
MTHFD2L	GSE63459	3.37402	0.431805	26.3638	1.04894	1.15936	0.246307	65
MTHFD2L	GSE68465	1.34647	1.03376	1.75379	0.134844	2.20616	0.0273725	442
MTHFD2L	GSE72094	1.53752	1.03117	2.29253	0.203821	2.11055	0.0348108	398
MTHFD2L	GSE87340	0.366233	0.128221	1.04606	0.535477	-1.87587	0.0606728	54
MTHFD2L	GSE8894	0.389648	0.164386	0.923589	0.440327	-2.14048	0.0323157	138
MTHFD2L	OncoSG.LUAD	2.00738	1.0018	4.02233	0.354613	1.96505	0.0494087	169
MTHFD2L	TCGA.LUAD	0.619619	0.469269	0.81814	0.141803	-3.37546	0.000736919	567
SUV39H1	ca00182	0.788849	0.586242	1.06148	0.151453	-1.56603	0.117341	442
SUV39H1	GSE10245	0.0960509	0.0128906	0.715697	1.0247	-2.2864	0.022231	58
SUV39H1	GSE11117	0.201997	0.061751	0.660763	0.604676	-2.64522	0.00816371	40
SUV39H1	GSE13213	1.723	0.773072	3.84017	0.408911	1.33053	0.183344	117
SUV39H1	GSE14814	0.491308	0.216295	1.11599	0.418593	-1.69779	0.0895471	90
SUV39H1	GSE19188	1.82841	1.01422	3.29622	0.300683	2.00692	0.0447579	82
SUV39H1	GSE29013	0.343661	0.0455547	2.59255	1.03101	-1.03597	0.300214	55
SUV39H1	GSE30219	2.06498	1.42992	2.98208	0.187505	3.8672	0.000110093	293
SUV39H1	GSE31210	2.57126	1.25799	5.25548	0.36474	2.58923	0.00961912	226
SUV39H1	GSE3141	0.452213	0.266711	0.766735	0.269386	-2.94596	0.00321953	111
SUV39H1	GSE31547	0.406488	0.081883	2.01791	0.817496	-1.10117	0.270823	30
SUV39H1	GSE36471	1.951	1.09565	3.4741	0.294389	2.27027	0.0231911	115
SUV39H1	GSE37745	1.63719	1.08169	2.47797	0.211462	2.33131	0.0197371	196
SUV39H1	GSE41271	1.91587	1.19737	3.06551	0.239822	2.71106	0.0067069	274
SUV39H1	GSE42127	2.25186	1.07257	4.72777	0.378424	2.1451	0.0319447	176
SUV39H1	GSE50081	1.75164	1.01934	3.01002	0.276227	2.02931	0.0424267	181
SUV39H1	GSE5843	0.580742	0.237107	1.4224	0.457047	-1.18904	0.234423	48
SUV39H1	GSE63459	3.18718	0.84412	12.0339	0.677868	1.70997	0.0872709	65
SUV39H1	GSE68465	0.798698	0.593553	1.07475	0.151461	-1.48403	0.137801	442
SUV39H1	GSE72094	1.61717	1.11444	2.34667	0.189964	2.53036	0.0113945	398
SUV39H1	GSE87340	5.97647	1.66058	21.5095	0.653413	2.73614	0.00621642	54
SUV39H1	GSE8894	1.78366	1.01742	3.12698	0.286434	2.02025	0.0433572	138
SUV39H1	Roepman.LUAD	2.73949	1.55734	4.81897	0.288163	3.49723	0.000470125	171
SUV39H1	TCGA.LUAD	1.94237	1.05805	3.5658	0.309945	2.14202	0.0321921	567
FTSJ2	ca00182	0.807973	0.615742	1.06022	0.138625	-1.53815	0.124012	442
FTSJ2	GSE10245	2.35189	1.01054	5.4737	0.430995	1.98429	0.0472233	58
FTSJ2	GSE11117	0.341502	0.138573	0.841606	0.460191	-2.33469	0.0195598	41
FTSJ2	GSE11969	1.45916	0.922696	2.30753	0.233839	1.6159	0.106116	149
FTSJ2	GSE13213	1.81097	0.937978	3.49649	0.335666	1.76921	0.0768585	117
FTSJ2	GSE14814	8.59741	1.1792	62.6827	1.0136	2.12259	0.0337883	90
FTSJ2	GSE19188	2.32979	1.32727	4.08954	0.287074	2.94621	0.00321692	82
FTSJ2	GSE29013	4.29464	0.569304	32.3973	1.03099	1.41356	0.157492	55
FTSJ2	GSE30219	1.42112	1.06617	1.89424	0.14662	2.39698	0.016531	293
FTSJ2	GSE31210	1.53996	0.739476	3.20696	0.374276	1.15357	0.248675	226
FTSJ2	GSE3141	0.547456	0.259235	1.15612	0.381408	-1.5796	0.114197	111
FTSJ2	GSE31547	3.45432e+08	0	Inf	9378.16	0.00209639	0.998327	30
FTSJ2	GSE36471	1.74127	0.96407	3.14502	0.301641	1.83865	0.065966	115
FTSJ2	GSE37745	1.34022	0.886992	2.02502	0.210591	1.39052	0.164371	196
FTSJ2	GSE41271	2.87557	1.9017	4.34817	0.210975	5.00653	5.54199e-07	274
FTSJ2	GSE42127	2.14553	1.14085	4.03496	0.322256	2.36887	0.0178423	176
FTSJ2	GSE50081	2.04057	1.07333	3.87945	0.327794	2.17584	0.0295669	181
FTSJ2	GSE5843	4.24143	0.535926	33.5676	1.05546	1.36898	0.171005	24
FTSJ2	GSE63459	4.74641	1.44093	15.6346	0.608225	2.56055	0.0104508	65
FTSJ2	GSE68465	0.89158	0.68758	1.15611	0.132562	-0.865705	0.386652	442
FTSJ2	GSE72094	0.712318	0.464526	1.09229	0.21812	-1.55525	0.119886	398
FTSJ2	GSE87340	5.59751	0.732	42.8034	1.03793	1.65939	0.0970376	54
FTSJ2	GSE8894	0.594078	0.332299	1.06208	0.296423	-1.75676	0.0789583	138
FTSJ2	Roepman.LUAD	0.257728	0.0624749	1.06321	0.723044	-1.8752	0.0607654	171
FTSJ2	TCGA.LUAD	1.59092	1.18269	2.14005	0.151288	3.06905	0.00214742	567
AHCYL2	ca00182	1.24281	0.826017	1.86992	0.208431	1.04292	0.296985	442
AHCYL2	ca00191	0.462779	0.248317	0.862463	0.31763	-2.4258	0.0152747	125
AHCYL2	GSE10245	3.15756	1.3605	7.32828	0.42957	2.67662	0.00743682	58
AHCYL2	GSE1037	0.154432	0.0356929	0.668179	0.747362	-2.49946	0.0124382	61
AHCYL2	GSE11117	0.655839	0.275688	1.56018	0.442173	-0.954014	0.340076	38
AHCYL2	GSE13213	0.406169	0.201389	0.819177	0.35793	-2.51721	0.0118288	117
AHCYL2	GSE14814	6.68098	0.915099	48.7766	1.0143	1.87249	0.0611386	90
AHCYL2	GSE19188	0.460449	0.262226	0.808514	0.287248	-2.69994	0.00693511	82
AHCYL2	GSE29013	0.318645	0.122631	0.827973	0.487204	-2.34743	0.0189035	55
AHCYL2	GSE30219	0.334418	0.240967	0.464111	0.167213	-6.55071	5.72624e-11	293
AHCYL2	GSE31210	0.107174	0.0256915	0.447089	0.728737	-3.06461	0.00217952	226
AHCYL2	GSE3141	1.80995	1.00403	3.26277	0.300658	1.97333	0.0484575	111
AHCYL2	GSE31547	0.106542	0.0130765	0.868068	1.07029	-2.09216	0.0364244	30
AHCYL2	GSE37745	0.791945	0.571241	1.09792	0.166677	-1.39949	0.161667	196
AHCYL2	GSE50081	0.538523	0.295862	0.980211	0.305586	-2.02537	0.0428294	181
AHCYL2	GSE5843	0.596775	0.257121	1.38511	0.429597	-1.20162	0.229509	45
AHCYL2	GSE68465	1.22681	0.944116	1.59416	0.133638	1.52965	0.126103	442
AHCYL2	GSE72094	0.458045	0.289389	0.724995	0.234288	-3.33259	0.000860424	398
AHCYL2	GSE87340	0.121876	0.0337571	0.440019	0.655019	-3.21327	0.00131233	54
AHCYL2	GSE8894	1.50182	0.86878	2.59614	0.279263	1.45626	0.14532	138
AHCYL2	OncoSG.LUAD	0.53494	0.290069	0.986529	0.31227	-2.0034	0.0451349	169
AHCYL2	Roepman.LUAD	0.441925	0.236304	0.826467	0.319404	-2.55669	0.0105674	171
AHCYL2	TCGA.LUAD	0.659648	0.469872	0.926072	0.173088	-2.40369	0.0162306	567
ENOPH1	ca00182	1.51725	1.17433	1.96031	0.130718	3.18928	0.00142627	442
ENOPH1	GSE10245	1.89561	0.739048	4.86209	0.480586	1.33075	0.183272	58
ENOPH1	GSE1037	0.450878	0.170449	1.19268	0.496314	-1.60495	0.108506	61
ENOPH1	GSE11117	0.401874	0.175438	0.92057	0.422893	-2.15567	0.0311096	41
ENOPH1	GSE13213	2.36812	1.31376	4.26866	0.300619	2.86774	0.0041341	117
ENOPH1	GSE14814	1.91283	0.840776	4.35183	0.419402	1.54645	0.121997	90
ENOPH1	GSE19188	3.22717	1.4509	7.17805	0.407876	2.87246	0.00407292	82
ENOPH1	GSE29013	2.78096	1.09398	7.06934	0.476014	2.14867	0.0316607	55
ENOPH1	GSE30219	2.89541	1.53198	5.47225	0.324783	3.27335	0.00106282	293
ENOPH1	GSE31210	0.58064	0.29238	1.1531	0.350046	-1.55301	0.120422	226
ENOPH1	GSE3141	0.550495	0.21988	1.37823	0.468241	-1.27485	0.202362	111
ENOPH1	GSE31547	5.00653	0.624016	40.1678	1.06243	1.5161	0.129495	30
ENOPH1	GSE36471	1.86043	0.803172	4.3094	0.428576	1.44853	0.147468	115
ENOPH1	GSE37745	1.65083	0.977844	2.78697	0.267189	1.87611	0.0606404	196
ENOPH1	GSE50081	0.677415	0.427287	1.07396	0.23512	-1.65648	0.0976252	181
ENOPH1	GSE5843	3.3816	1.09247	10.4673	0.576492	2.11338	0.0345681	47
ENOPH1	GSE68465	1.50927	1.16768	1.95079	0.130926	3.14396	0.00166679	442
ENOPH1	GSE72094	0.662604	0.429655	1.02185	0.221023	-1.86215	0.062582	398
ENOPH1	GSE87340	2.87279e+08	0	Inf	7894.38	0.00246707	0.998032	54
ENOPH1	GSE8894	0.635245	0.359009	1.12403	0.29116	-1.5584	0.119138	138
ENOPH1	OncoSG.LUAD	2.85212	1.54722	5.25755	0.312048	3.35865	0.000783229	169
ENOPH1	Roepman.LUAD	0.586095	0.315087	1.0902	0.316656	-1.68724	0.0915574	171
ENOPH1	TCGA.LUAD	1.43077	1.08848	1.88069	0.139507	2.56769	0.010238	567
SLC38A7	ca00182	0.670086	0.518168	0.866545	0.13118	-3.05191	0.00227391	442
SLC38A7	GSE10245	3.01682	0.405278	22.4567	1.0242	1.07812	0.280981	58
SLC38A7	GSE1037	0.299039	0.0970809	0.921135	0.574006	-2.10308	0.0354588	61
SLC38A7	GSE13213	1.73068	0.95941	3.12199	0.301002	1.8223	0.0684094	117
SLC38A7	GSE14814	1.54933	0.818663	2.93213	0.325469	1.34521	0.178557	90
SLC38A7	GSE19188	2.77295	1.56661	4.90821	0.29133	3.50088	0.000463722	82
SLC38A7	GSE29013	2.37955	0.54592	10.372	0.751134	1.15414	0.248443	55
SLC38A7	GSE30219	1.52949	1.03068	2.26971	0.20139	2.11	0.0348587	293
SLC38A7	GSE31210	7.95179	2.43315	25.9873	0.604201	3.43164	0.000599953	226
SLC38A7	GSE3141	1.45847	0.818118	2.60005	0.294974	1.2794	0.200756	111
SLC38A7	GSE31547	0.311968	0.0644291	1.51056	0.804777	-1.44743	0.147777	30
SLC38A7	GSE37745	1.39442	0.961071	2.02318	0.189895	1.75086	0.0799692	196
SLC38A7	GSE50081	3.59568	1.1323	11.4183	0.589542	2.17072	0.0299521	181
SLC38A7	GSE5843	0.335707	0.0450051	2.50415	1.02526	-1.06463	0.287044	48
SLC38A7	GSE68465	0.717328	0.53634	0.959391	0.148352	-2.23941	0.0251291	442
SLC38A7	GSE72094	1.88677	1.12565	3.16253	0.263529	2.4091	0.0159921	398
SLC38A7	GSE87340	8.40577	2.71356	26.0385	0.576876	3.69042	0.00022388	54
SLC38A7	GSE8894	3.18935	1.78116	5.71086	0.297226	3.90214	9.53479e-05	138
SLC38A7	OncoSG.LUAD	1.57958	0.853679	2.92274	0.313965	1.45609	0.145368	169
SLC38A7	Roepman.LUAD	0.434422	0.194472	0.970437	0.410073	-2.03314	0.0420381	171
SLC38A7	TCGA.LUAD	1.32757	0.999565	1.76322	0.144793	1.95696	0.050352	567
CHDH	GSE10245	1.99903	0.849039	4.70664	0.436902	1.58539	0.112877	58
CHDH	GSE1037	0.246301	0.0564279	1.07507	0.751845	-1.86368	0.062366	61
CHDH	GSE11117	2.89231	0.980075	8.53553	0.552144	1.92351	0.0544158	41
CHDH	GSE11969	0.603237	0.377943	0.96283	0.238559	-2.11875	0.034112	149
CHDH	GSE13213	0.487019	0.277503	0.854721	0.286981	-2.50697	0.0121771	117
CHDH	GSE19188	0.610036	0.336375	1.10634	0.303727	-1.62724	0.103686	82
CHDH	GSE29013	0.406344	0.115853	1.42522	0.640256	-1.40655	0.15956	55
CHDH	GSE30219	0.275688	0.145657	0.521799	0.325523	-3.9582	7.5516e-05	293
CHDH	GSE31210	0.406434	0.0972784	1.6981	0.729526	-1.23414	0.217152	226
CHDH	GSE3141	1.96331	1.14016	3.38074	0.277281	2.43302	0.0149734	111
CHDH	GSE36471	1.70545	1.01826	2.85641	0.263134	2.02874	0.0424846	115
CHDH	GSE37745	0.65658	0.473237	0.910956	0.167069	-2.51818	0.0117963	196
CHDH	GSE41271	1.29406	0.902602	1.8553	0.183809	1.40246	0.160777	274
CHDH	GSE42127	0.237274	0.0579408	0.971662	0.719295	-1.99993	0.0455079	176
CHDH	GSE50081	2.68758	1.48134	4.87606	0.303932	3.25284	0.00114257	181
CHDH	GSE5843	2.13755	0.717109	6.37161	0.55725	1.36323	0.172809	48
CHDH	GSE63459	0.282235	0.0858491	0.927868	0.60723	-2.08325	0.0372281	65
CHDH	GSE72094	0.749229	0.517712	1.08428	0.188588	-1.53091	0.125793	398
CHDH	GSE87340	0.269982	0.0745362	0.977919	0.656681	-1.99397	0.0461558	54
CHDH	GSE8894	0.636539	0.371364	1.09106	0.274935	-1.64297	0.100389	138
CHDH	OncoSG.LUAD	0.33493	0.146935	0.763453	0.42038	-2.60201	0.00926794	169
CHDH	Roepman.LUAD	0.658659	0.307731	1.40978	0.388262	-1.07543	0.282182	171
CHDH	TCGA.LUAD	0.658035	0.49605	0.872916	0.144177	-2.90267	0.00369995	567
SETD8	GSE10245	0.398318	0.170192	0.932225	0.433847	-2.12173	0.0338605	58
SETD8	GSE1037	2.21182	0.733009	6.67404	0.563485	1.40876	0.158907	61
SETD8	GSE11117	0.467952	0.189427	1.156	0.461417	-1.64578	0.099809	40
SETD8	GSE13213	2.40379	1.07616	5.36931	0.410034	2.13897	0.0324383	117
SETD8	GSE19188	2.45529	1.32885	4.53657	0.313234	2.86764	0.00413545	82
SETD8	GSE29013	1.89714	0.718147	5.0117	0.495636	1.29197	0.196367	55
SETD8	GSE30219	2.01521	1.46192	2.7779	0.163765	4.27884	1.87871e-05	293
SETD8	GSE31210	0.300219	0.148892	0.605351	0.35781	-3.3628	0.00077157	226
SETD8	GSE3141	0.41055	0.236748	0.711947	0.280875	-3.16959	0.00152656	111
SETD8	GSE36471	1.7282	0.994579	3.00296	0.281901	1.94068	0.0522967	115
SETD8	GSE37745	1.57749	1.07631	2.31204	0.195052	2.337	0.0194393	196
SETD8	GSE41271	1.40053	0.802687	2.44363	0.284005	1.18607	0.235597	274
SETD8	GSE42127	0.586662	0.289679	1.18812	0.360045	-1.48122	0.138547	176
SETD8	GSE50081	1.87387	1.14578	3.06463	0.250984	2.50218	0.012343	181
SETD8	GSE63459	0.3577	0.109113	1.17263	0.605783	-1.69708	0.0896823	65
SETD8	GSE68465	0.749342	0.539575	1.04066	0.167561	-1.72211	0.0850488	442
SETD8	GSE72094	2.11933	0.985587	4.55726	0.39063	1.9228	0.0545054	398
SETD8	GSE87340	2.88102	0.963877	8.61137	0.558652	1.89411	0.058211	54
SETD8	GSE8894	6.80751	0.941187	49.2379	1.00953	1.89992	0.0574432	138
SETD8	Roepman.LUAD	0.502189	0.198898	1.26796	0.472553	-1.45757	0.144959	171
SETD8	TCGA.LUAD	1.6331	1.23052	2.16737	0.14441	3.39643	0.000682702	567
MTFMT	GSE10245	1.73185	0.743862	4.03208	0.431177	1.2737	0.202769	58
MTFMT	GSE1037	0.387	0.127966	1.17038	0.564631	-1.68133	0.0926988	61
MTFMT	GSE11117	0.346779	0.117463	1.02377	0.552338	-1.91743	0.0551836	41
MTFMT	GSE13213	2.72835	0.978568	7.60692	0.523153	1.91855	0.055041	117
MTFMT	GSE19188	0.516634	0.268074	0.995663	0.334737	-1.97295	0.0485014	82
MTFMT	GSE29013	0.214089	0.0283245	1.61818	1.03199	-1.49358	0.135285	55
MTFMT	GSE30219	0.848784	0.64221	1.12181	0.142293	-1.1522	0.249239	293
MTFMT	GSE31210	1.75486	0.822148	3.74572	0.386856	1.45374	0.146018	226
MTFMT	GSE3141	0.536739	0.309097	0.932033	0.281564	-2.20995	0.0271087	111
MTFMT	GSE36471	2.25066	1.07126	4.72853	0.378778	2.14169	0.0322183	115
MTFMT	GSE37745	1.37061	0.974903	1.92693	0.173816	1.81373	0.0697191	196
MTFMT	GSE41271	0.701846	0.489422	1.00647	0.183927	-1.9249	0.0542423	274
MTFMT	GSE42127	0.702569	0.428221	1.15268	0.252609	-1.39746	0.162274	176
MTFMT	GSE50081	0.476821	0.240331	0.946023	0.34956	-2.1187	0.0341156	181
MTFMT	GSE5843	0.363044	0.121329	1.08631	0.559204	-1.81192	0.0699987	48
MTFMT	GSE63459	0.269536	0.0711873	1.02054	0.679292	-1.93003	0.0536032	65
MTFMT	GSE72094	0.780676	0.535318	1.13849	0.192503	-1.28618	0.19838	398
MTFMT	GSE87340	0.225969	0.07898	0.646518	0.536338	-2.77317	0.0055513	54
MTFMT	GSE8894	1.67965	0.859833	3.28115	0.341642	1.51793	0.129032	138
MTFMT	OncoSG.LUAD	2.8108	1.50826	5.23824	0.317615	3.25384	0.00113855	169
MTFMT	Roepman.LUAD	0.621036	0.31786	1.21338	0.34173	-1.39399	0.163322	171
MTFMT	TCGA.LUAD	1.34821	0.904759	2.00901	0.203506	1.46815	0.142063	567
PRMT6	GSE10245	0.296283	0.0989759	0.886916	0.559417	-2.17448	0.029669	58
PRMT6	GSE1037	0.384196	0.0512952	2.8776	1.02734	-0.931141	0.351781	61
PRMT6	GSE11117	0.585921	0.257869	1.33131	0.418749	-1.27659	0.201747	41
PRMT6	GSE13213	3.73571	1.79912	7.75686	0.372782	3.53541	0.000407144	117
PRMT6	GSE19188	0.49889	0.268592	0.926653	0.315921	-2.20109	0.0277299	82
PRMT6	GSE29013	1.66392	0.623345	4.44158	0.500944	1.01643	0.309422	55
PRMT6	GSE30219	2.05515	1.46292	2.88712	0.173427	4.1536	3.27279e-05	293
PRMT6	GSE31210	2.54962	1.19275	5.45004	0.387599	2.41472	0.0157474	226
PRMT6	GSE3141	2.32747	1.32551	4.0868	0.287241	2.94102	0.00327138	111
PRMT6	GSE36471	1.53799	0.946092	2.50019	0.247909	1.73643	0.0824873	115
PRMT6	GSE37745	0.761495	0.536309	1.08123	0.178867	-1.52333	0.127677	196
PRMT6	GSE41271	1.76668	1.20925	2.58106	0.193421	2.9423	0.00325784	274
PRMT6	GSE42127	1.79236	1.02474	3.13497	0.285255	2.04564	0.0407914	176
PRMT6	GSE50081	0.398035	0.208546	0.759698	0.329792	-2.79332	0.005217	181
PRMT6	GSE5843	3.15298	1.04597	9.50437	0.562972	2.0398	0.0413707	47
PRMT6	GSE63459	7.19873	2.07201	25.0104	0.635413	3.10649	0.00189323	65
PRMT6	GSE72094	1.42757	0.947452	2.15098	0.209162	1.70189	0.0887756	398
PRMT6	GSE87340	4.23321	0.946083	18.9414	0.764497	1.88746	0.0590978	54
PRMT6	GSE8894	1.70083	0.973676	2.97104	0.284594	1.86623	0.0620093	138
PRMT6	OncoSG.LUAD	1.94382	1.01398	3.72636	0.332034	2.00177	0.0453092	169
PRMT6	Roepman.LUAD	4.31198	1.04535	17.7866	0.722998	2.0213	0.0432485	171
PRMT6	TCGA.LUAD	1.77315	1.30838	2.40301	0.155089	3.69307	0.000221559	567
MSRB3	GSE10245	0.456084	0.153826	1.35226	0.554528	-1.41576	0.156846	58
MSRB3	GSE1037	0.184959	0.0646916	0.528815	0.535981	-3.14866	0.00164022	61
MSRB3	GSE13213	1.97732	1.07502	3.63695	0.310926	2.19262	0.028335	117
MSRB3	GSE19188	2.49288	1.36107	4.56584	0.308763	2.95838	0.00309264	82
MSRB3	GSE29013	2.40256	0.69346	8.32389	0.633989	1.38257	0.166797	55
MSRB3	GSE30219	1.42083	0.995687	2.02751	0.181414	1.93614	0.0528511	293
MSRB3	GSE31210	2.13095	0.652076	6.96383	0.604175	1.25223	0.210485	226
MSRB3	GSE3141	0.500392	0.226975	1.10317	0.40335	-1.71653	0.0860642	111
MSRB3	GSE36471	1.34094	0.817294	2.20008	0.25262	1.16131	0.245518	115
MSRB3	GSE37745	0.752102	0.540178	1.04717	0.168867	-1.68703	0.0915981	196
MSRB3	GSE41271	0.673002	0.45079	1.00475	0.204466	-1.93679	0.0527716	274
MSRB3	GSE42127	1.50984	0.846355	2.69344	0.295321	1.3951	0.162986	176
MSRB3	GSE50081	0.381772	0.205166	0.710396	0.316843	-3.03915	0.00237247	181
MSRB3	GSE63459	0.34195	0.104219	1.12197	0.606223	-1.77012	0.0767067	65
MSRB3	GSE72094	0.523168	0.337317	0.811418	0.223922	-2.8932	0.00381338	398
MSRB3	GSE87340	3.59424e-09	0	Inf	8008.72	-0.00242785	0.998063	54
MSRB3	GSE8894	1.34813	0.735142	2.47224	0.309397	0.965478	0.334306	138
MSRB3	OncoSG.LUAD	0.40908	0.194032	0.862471	0.380563	-2.34874	0.018837	169
MSRB3	Roepman.LUAD	0.379577	0.193761	0.743587	0.343082	-2.82351	0.00475003	171
MSRB3	TCGA.LUAD	0.795671	0.603876	1.04838	0.140726	-1.62422	0.10433	567
IL4I1	GSE10245	0.304358	0.122891	0.753786	0.462715	-2.57081	0.0101461	58
IL4I1	GSE1037	0.666109	0.240807	1.84256	0.519121	-0.782672	0.433819	61
IL4I1	GSE11117	0.47124	0.185192	1.19912	0.476527	-1.5789	0.114359	40
IL4I1	GSE13213	0.405576	0.189434	0.868333	0.388409	-2.32345	0.0201552	117
IL4I1	GSE19188	1.9283	0.599243	6.20507	0.5963	1.10119	0.270814	82
IL4I1	GSE29013	1.25677e-08	0	Inf	5994.19	-0.00303496	0.997578	55
IL4I1	GSE30219	2.77705	1.60957	4.79133	0.27828	3.67035	0.000242214	293
IL4I1	GSE31210	5.23415	1.84606	14.8404	0.531719	3.11293	0.00185239	226
IL4I1	GSE3141	1.63351	0.893798	2.98543	0.307663	1.59503	0.110705	111
IL4I1	GSE36471	1.35591	0.807088	2.27792	0.264695	1.15027	0.250034	115
IL4I1	GSE37745	0.814553	0.585229	1.13374	0.168695	-1.2159	0.224024	196
IL4I1	GSE41271	1.89631	0.96124	3.741	0.346661	1.84593	0.0649026	274
IL4I1	GSE42127	2.10071	0.998202	4.42091	0.379636	1.95522	0.0505566	176
IL4I1	GSE50081	1.80974	1.14323	2.86484	0.234355	2.53114	0.0113694	181
IL4I1	GSE5843	0.256594	0.103568	0.635723	0.462901	-2.93856	0.00329742	48
IL4I1	GSE63459	5.21358	0.666561	40.7786	1.04945	1.57345	0.115614	65
IL4I1	GSE72094	1.55979	0.929527	2.61741	0.264103	1.68326	0.0923255	398
IL4I1	GSE87340	3.41256e+08	0	Inf	7137.02	0.00275299	0.997803	54
IL4I1	GSE8894	0.2885	0.154046	0.540309	0.320131	-3.88297	0.000103188	138
IL4I1	OncoSG.LUAD	2.10025	0.882316	4.99942	0.442489	1.67701	0.093541	169
IL4I1	TCGA.LUAD	1.23735	0.93539	1.63678	0.142738	1.49203	0.135691	567
APIP	GSE1037	0.153792	0.0205474	1.1511	1.02699	-1.82295	0.0683116	61
APIP	GSE11117	0.559767	0.244415	1.282	0.42279	-1.37239	0.169941	41
APIP	GSE13213	3.24618	1.68338	6.25985	0.335045	3.51439	0.000440765	117
APIP	GSE30219	0.429883	0.249105	0.741853	0.278392	-3.03257	0.00242482	293
APIP	GSE36471	0.621296	0.375715	1.0274	0.256625	-1.85464	0.0636481	115
APIP	GSE37745	0.592791	0.425419	0.826011	0.169272	-3.08919	0.00200701	196
APIP	GSE41271	0.73411	0.47806	1.1273	0.218842	-1.41242	0.157826	274
APIP	GSE42127	0.60177	0.329821	1.09795	0.306805	-1.65538	0.097847	176
APIP	GSE50081	0.571644	0.362855	0.90057	0.231898	-2.41157	0.0158838	181
APIP	GSE5843	2.65034	0.882937	7.95564	0.560822	1.73797	0.0822169	47
APIP	GSE63459	2.02019	0.435755	9.36578	0.782601	0.898534	0.368901	65
APIP	GSE68465	1.29572	0.991363	1.69352	0.136605	1.89646	0.0578991	442
APIP	GSE72094	0.520524	0.352085	0.769543	0.199474	-3.27321	0.00106335	398
APIP	GSE87340	3.51652	0.943577	13.1054	0.671211	1.87344	0.061008	54
APIP	GSE8894	1.96204	0.776395	4.9583	0.473008	1.42489	0.154189	138
APIP	OncoSG.LUAD	2.80616	1.3325	5.90957	0.379985	2.71542	0.00661925	169
APIP	Roepman.LUAD	0.363396	0.142336	0.92778	0.478224	-2.11671	0.0342844	171
APIP	TCGA.LUAD	1.14106	0.867839	1.5003	0.139648	0.944917	0.344701	567
SMS	GSE11117	0.575101	0.242693	1.3628	0.440187	-1.25676	0.208841	41
SMS	GSE11969	2.53714	1.50373	4.28074	0.266888	3.48849	0.000485749	149
SMS	GSE13213	3.49747	1.80839	6.7642	0.336538	3.72035	0.000198945	117
SMS	GSE30219	2.57973	1.5685	4.24293	0.253865	3.73303	0.000189193	293
SMS	GSE36471	2.37108	1.23895	4.53771	0.331168	2.60697	0.00913471	115
SMS	GSE37745	1.41038	1.01281	1.96402	0.168947	2.03533	0.041818	196
SMS	GSE41271	2.30009	1.39092	3.80354	0.256628	3.24574	0.00117146	274
SMS	GSE42127	1.69247	1.02617	2.79141	0.255288	2.06117	0.0392868	176
SMS	GSE50081	1.41787	0.824573	2.43806	0.27656	1.2625	0.206768	181
SMS	GSE5843	4.20315	0.559821	31.5574	1.02858	1.39594	0.162732	48
SMS	GSE63459	1.90202	0.580226	6.23493	0.605752	1.06135	0.288531	65
SMS	GSE68465	1.94723	1.49202	2.54134	0.13586	4.90513	9.33648e-07	442
SMS	GSE68571	3.674	1.37907	9.78795	0.499943	2.60286	0.00924494	64
SMS	GSE72094	1.45515	0.856733	2.47157	0.270281	1.38786	0.16518	398
SMS	GSE87340	5.74347	1.75157	18.8331	0.605905	2.88504	0.00391358	54
SMS	GSE8894	1.98654	1.15914	3.40455	0.274862	2.49723	0.0125168	138
SMS	Roepman.LUAD	1.6312	0.791395	3.36219	0.369025	1.32597	0.184848	171
SMS	TCGA.LUAD	1.90478	1.43915	2.52105	0.143019	4.50543	6.62377e-06	567
SLC43A2	GSE10245	1.9496	0.65386	5.81307	0.557401	1.19774	0.231017	58
SLC43A2	GSE13213	0.143488	0.0348326	0.591081	0.722309	-2.68791	0.00719006	117
SLC43A2	GSE19188	2.24555	1.24416	4.05294	0.301277	2.68507	0.00725137	82
SLC43A2	GSE29013	0.161018	0.0591535	0.438297	0.510918	-3.57443	0.000350993	55
SLC43A2	GSE30219	0.490409	0.301774	0.796959	0.247741	-2.87605	0.00402683	293
SLC43A2	GSE31210	0.446169	0.214109	0.929742	0.374604	-2.15443	0.0312064	226
SLC43A2	GSE3141	0.521297	0.304828	0.891489	0.273767	-2.37953	0.0173348	111
SLC43A2	GSE36471	1.81442	1.10041	2.99172	0.25515	2.33496	0.0195458	115
SLC43A2	GSE37745	0.714406	0.502238	1.0162	0.179787	-1.87057	0.0614048	196
SLC43A2	GSE41271	0.665776	0.449758	0.985548	0.200129	-2.0327	0.0420826	274
SLC43A2	GSE42127	1.69279	0.919615	3.11602	0.311321	1.69079	0.0908776	176
SLC43A2	GSE50081	1.57171	0.828753	2.9807	0.326534	1.38473	0.166135	181
SLC43A2	GSE63459	0.117032	0.0354792	0.386043	0.60894	-3.52302	0.000426665	65
SLC43A2	GSE72094	0.658931	0.452416	0.959715	0.191849	-2.17429	0.0296833	398
SLC43A2	GSE87340	4.59795	0.601082	35.1718	1.0381	1.46962	0.141664	54
SLC43A2	GSE8894	0.634231	0.365396	1.10086	0.281347	-1.61843	0.105569	138
SLC43A2	OncoSG.LUAD	1.30804	0.694776	2.46261	0.322808	0.831848	0.405495	169
SLC43A2	Roepman.LUAD	0.605469	0.330962	1.10766	0.308169	-1.62818	0.103488	171
SLC43A2	TCGA.LUAD	0.631372	0.405307	0.98353	0.226153	-2.0334	0.0420122	567
SETD7	GSE10245	2.23012	0.907179	5.48229	0.458922	1.74769	0.0805172	58
SETD7	GSE1037	0.40661	0.13485	1.22604	0.563117	-1.59807	0.110027	61
SETD7	GSE11117	0.339381	0.132896	0.866686	0.478352	-2.25907	0.023879	41
SETD7	GSE13213	0.538922	0.287963	1.00859	0.31977	-1.93321	0.0532099	117
SETD7	GSE19188	0.279491	0.0863714	0.904408	0.59915	-2.12766	0.0333653	82
SETD7	GSE29013	0.226664	0.0894577	0.574309	0.474346	-3.12913	0.00175326	55
SETD7	GSE30219	0.481899	0.333929	0.695436	0.187149	-3.90075	9.58958e-05	293
SETD7	GSE31210	0.381438	0.166444	0.874141	0.423116	-2.27788	0.022734	226
SETD7	GSE3141	1.78225	0.807554	3.93339	0.403897	1.43076	0.1525	111
SETD7	GSE36471	1.80921	0.963759	3.39633	0.321335	1.84509	0.065025	115
SETD7	GSE37745	0.612297	0.396062	0.946588	0.222273	-2.20692	0.0273196	196
SETD7	GSE50081	0.49936	0.29314	0.850654	0.27178	-2.55511	0.0106153	181
SETD7	GSE5843	0.429149	0.174433	1.05582	0.459327	-1.84171	0.0655169	47
SETD7	GSE72094	0.587316	0.365363	0.944101	0.242184	-2.19748	0.0279864	398
SETD7	GSE87340	0.160653	0.0525662	0.490987	0.569996	-3.20793	0.00133693	54
SETD7	GSE8894	0.612709	0.299212	1.25467	0.365689	-1.33957	0.180386	138
SETD7	OncoSG.LUAD	0.6511	0.287373	1.47519	0.417294	-1.02827	0.303821	169
SETD7	Roepman.LUAD	0.219668	0.0533526	0.90444	0.722052	-2.09907	0.035811	171
SETD7	TCGA.LUAD	1.26376	0.95904	1.66529	0.140774	1.66287	0.0963381	567
SEPX1	ca00182	1.32035	1.0034	1.73741	0.140052	1.98423	0.0472301	442
SEPX1	GSE10245	3.55708	1.53406	8.24791	0.4291	2.95721	0.00310435	58
SEPX1	GSE1037	0.320254	0.127414	0.804953	0.470249	-2.42136	0.0154626	61
SEPX1	GSE11117	2.83257	0.950918	8.43756	0.556903	1.86959	0.0615402	41
SEPX1	GSE11969	0.743288	0.470581	1.17403	0.233226	-1.27204	0.20336	149
SEPX1	GSE13213	1.51678	0.857585	2.68269	0.290938	1.4319	0.152174	117
SEPX1	GSE14814	3.15693	1.63929	6.07961	0.334363	3.43818	0.000585638	90
SEPX1	GSE19188	0.484295	0.270591	0.866777	0.296988	-2.44138	0.0146314	82
SEPX1	GSE29013	0.309082	0.100577	0.949835	0.572807	-2.04982	0.0403824	55
SEPX1	GSE31210	3.37559	1.67623	6.79779	0.357163	3.40621	0.000658717	226
SEPX1	GSE3141	1.51175	0.782364	2.92112	0.336078	1.22967	0.21882	111
SEPX1	GSE31547	8.19651	1.33393	50.3644	0.926331	2.27101	0.0231463	30
SEPX1	GSE36471	2.02897	1.21206	3.39646	0.262865	2.6916	0.00711107	115
SEPX1	GSE41271	0.635868	0.350392	1.15393	0.304055	-1.48908	0.136465	274
SEPX1	GSE42127	0.452544	0.181434	1.12877	0.466332	-1.70022	0.0890888	176
SEPX1	GSE5843	0.323441	0.121699	0.859612	0.498716	-2.26329	0.0236178	48
SEPX1	GSE63459	0.372376	0.0987101	1.40476	0.677419	-1.45826	0.14477	65
SEPX1	GSE72094	1.59783	1.07518	2.37454	0.202124	2.31862	0.0204159	398
SEPX1	GSE87340	4.57663	1.51566	13.8194	0.563842	2.6975	0.00698626	54
SEPX1	GSE8894	0.669593	0.352722	1.27113	0.327041	-1.2264	0.220046	138
SEPX1	TCGA.LUAD	1.37982	0.983408	1.93602	0.1728	1.86314	0.0624422	567
MRI1	GSE10245	0.478142	0.186422	1.22635	0.480567	-1.53537	0.124693	58
MRI1	GSE19188	0.57529	0.228249	1.44999	0.47166	-1.1722	0.241116	82
MRI1	GSE29013	3.70101	1.20915	11.3282	0.57077	2.2927	0.0218652	55
MRI1	GSE30219	1.53024	1.09695	2.13467	0.169844	2.5048	0.012252	293
MRI1	GSE31210	0.297082	0.147484	0.598421	0.357296	-3.39704	0.000681187	226
MRI1	GSE3141	0.0766152	0.0105999	0.553771	1.00918	-2.54559	0.0109092	111
MRI1	GSE37745	0.723712	0.510741	1.02549	0.177825	-1.81842	0.0689996	196
MRI1	GSE50081	0.495452	0.275706	0.890341	0.299054	-2.34836	0.0188564	181
MRI1	GSE5843	1.89643	0.555223	6.47748	0.626725	1.02114	0.307188	48
MRI1	GSE72094	0.574845	0.395341	0.835854	0.191	-2.89871	0.00374697	398
MRI1	GSE87340	0.200848	0.0557529	0.723548	0.653899	-2.45482	0.0140954	54
MRI1	OncoSG.LUAD	0.505665	0.273014	0.936572	0.314471	-2.16834	0.0301328	169
MRI1	Roepman.LUAD	2.10596	1.14806	3.8631	0.309547	2.40601	0.016128	171
MRI1	TCGA.LUAD	0.536505	0.375955	0.765616	0.181434	-3.43198	0.000599184	567
