# Supplementary material for: A novel methionine metabolism-related signature predicts prognosis and immunotherapy response in lung adenocarcinoma
Source: Aging (Albany NY). 2023 May 2;15(9):3498–523. doi: 10.18632/aging.204687 (PMC10449287; doi:10.18632/aging.204687)
Supplement: Supplementary Table 7 [file aging-15-204687-s007.xlsx]

## Sheet: Table S7
Supplementary Table 7. The differences of a list of TME-related signatures among three MRG modification patterns.
Signatures	Group1	Group2	FC	p	FDR	signifCode	alternative	adj.method
CD_8_T_effector	C1	Rest	1.01051	0.3	0.37875		two.sided	BH
CD_8_T_effector	C2	Rest	0.976766	0.0043	0.00917535	**	two.sided	BH
CD_8_T_effector	C3	Rest	1.01597	0.045	0.0729144	.	two.sided	BH
DDR	C1	Rest	1.00447	0.0019	0.00456905	**	two.sided	BH
DDR	C2	Rest	0.981785	1.3e-36	9.8475e-35	****	two.sided	BH
DDR	C3	Rest	1.0168	2e-25	6.73333e-24	****	two.sided	BH
APM	C1	Rest	1.0005	0.48	0.570353		two.sided	BH
APM	C2	Rest	0.999011	0.014	0.0257091	*	two.sided	BH
APM	C3	Rest	1.0006	0.055	0.0872513	.	two.sided	BH
Immune_Checkpoint	C1	Rest	1.00375	0.63	0.701801		two.sided	BH
Immune_Checkpoint	C2	Rest	0.990766	0.19	0.254735		two.sided	BH
Immune_Checkpoint	C3	Rest	1.00671	0.36	0.448889		two.sided	BH
CellCycle_Reg	C1	Rest	1.00012	0.92	0.926113		two.sided	BH
CellCycle_Reg	C2	Rest	0.994806	0.012	0.0221707	*	two.sided	BH
CellCycle_Reg	C3	Rest	1.00605	0.0091	0.017675	*	two.sided	BH
Pan_F_TBRs	C1	Rest	0.99825	0.79	0.831146		two.sided	BH
Pan_F_TBRs	C2	Rest	1.00496	0.16	0.220364		two.sided	BH
Pan_F_TBRs	C3	Rest	0.996156	0.22	0.284872		two.sided	BH
EMT1	C1	Rest	1.00159	0.43	0.519084		two.sided	BH
EMT1	C2	Rest	1.00556	0.025	0.0440407	*	two.sided	BH
EMT1	C3	Rest	0.991638	0.001	0.00261207	**	two.sided	BH
EMT2	C1	Rest	0.994741	0.62	0.70097		two.sided	BH
EMT2	C2	Rest	1.00537	0.7	0.760215		two.sided	BH
EMT2	C3	Rest	0.999708	0.91	0.925268		two.sided	BH
EMT3	C1	Rest	0.973983	3.9e-08	1.90597e-07	****	two.sided	BH
EMT3	C2	Rest	1.04728	9.9e-24	1.9998e-22	****	two.sided	BH
EMT3	C3	Rest	0.975823	4.6e-07	2.04971e-06	****	two.sided	BH
Cell_cycle	C1	Rest	1.0058	0.0015	0.00369512	**	two.sided	BH
Cell_cycle	C2	Rest	0.975503	6.7e-37	6.767e-35	****	two.sided	BH
Cell_cycle	C3	Rest	1.02301	2.3e-25	6.969e-24	****	two.sided	BH
Mismatch_Repair	C1	Rest	1.00898	0.00029	0.000844904	***	two.sided	BH
Mismatch_Repair	C2	Rest	0.970656	5.4e-36	3.2724e-34	****	two.sided	BH
Mismatch_Repair	C3	Rest	1.02534	1.9e-22	3.03e-21	****	two.sided	BH
Homologous_recombination	C1	Rest	1.00746	0.00037	0.00106771	**	two.sided	BH
Homologous_recombination	C2	Rest	0.971275	9.1e-43	2.7573e-40	****	two.sided	BH
Homologous_recombination	C3	Rest	1.02634	1.1e-28	4.76143e-27	****	two.sided	BH
Nucleotide_excision_repair	C1	Rest	1.00403	0.012	0.0221707	*	two.sided	BH
Nucleotide_excision_repair	C2	Rest	0.985707	1.9e-22	3.03e-21	****	two.sided	BH
Nucleotide_excision_repair	C3	Rest	1.01251	2.5e-15	2.16429e-14	****	two.sided	BH
DNA_replication	C1	Rest	1.01079	0.00074	0.00200196	**	two.sided	BH
DNA_replication	C2	Rest	0.961855	2.6e-37	3.939e-35	****	two.sided	BH
DNA_replication	C3	Rest	1.03433	9e-25	2.16762e-23	****	two.sided	BH
Base_excision_repair	C1	Rest	1.00571	0.0023	0.00527955	**	two.sided	BH
Base_excision_repair	C2	Rest	0.980272	2.1e-31	1.0605e-29	****	two.sided	BH
Base_excision_repair	C3	Rest	1.01721	4.6e-21	6.47318e-20	****	two.sided	BH
TMEscoreA_CIR	C1	Rest	1.00703	0.057	0.0890258	.	two.sided	BH
TMEscoreA_CIR	C2	Rest	0.978988	9.1e-08	4.242e-07	****	two.sided	BH
TMEscoreA_CIR	C3	Rest	1.01727	0.00016	0.0004848	***	two.sided	BH
TMEscoreB_CIR	C1	Rest	0.994274	0.067	0.100005		two.sided	BH
TMEscoreB_CIR	C2	Rest	1.02494	9.1e-18	9.8475e-17	****	two.sided	BH
TMEscoreB_CIR	C3	Rest	0.977662	1.6e-13	1.24308e-12	****	two.sided	BH
CD8_Rooney_et_al	C1	Rest	1.0078	0.64	0.71033		two.sided	BH
CD8_Rooney_et_al	C2	Rest	0.980979	0.032	0.0541676	.	two.sided	BH
CD8_Rooney_et_al	C3	Rest	1.01393	0.066	0.099	.	two.sided	BH
B_cells_Rooney_et_al	C1	Rest	0.997492	0.65	0.716182		two.sided	BH
B_cells_Rooney_et_al	C2	Rest	1.01524	0.0044	0.00925833	**	two.sided	BH
B_cells_Rooney_et_al	C3	Rest	0.985076	0.0088	0.0173143	*	two.sided	BH
Treg_Rooney_et_al	C1	Rest	1.001	0.71	0.762872		two.sided	BH
Treg_Rooney_et_al	C2	Rest	0.999411	0.62	0.70097		two.sided	BH
Treg_Rooney_et_al	C3	Rest	0.999547	0.89	0.914136		two.sided	BH
Macrophages_Rooney_et_al	C1	Rest	0.99901	0.69	0.754765		two.sided	BH
Macrophages_Rooney_et_al	C2	Rest	1.01191	0.002	0.00477165	**	two.sided	BH
Macrophages_Rooney_et_al	C3	Rest	0.987195	0.00015	0.000459091	***	two.sided	BH
Neutrophils_Rooney_et_al	C1	Rest	0.991692	0.0044	0.00925833	**	two.sided	BH
Neutrophils_Rooney_et_al	C2	Rest	1.03072	4.7e-21	6.47318e-20	****	two.sided	BH
Neutrophils_Rooney_et_al	C3	Rest	0.974073	6.2e-13	4.6965e-12	****	two.sided	BH
pDCs_Rooney_et_al	C1	Rest	0.998688	0.46	0.553095		two.sided	BH
pDCs_Rooney_et_al	C2	Rest	1.00872	0.0065	0.013043	*	two.sided	BH
pDCs_Rooney_et_al	C3	Rest	0.99126	0.03	0.0516477	.	two.sided	BH
Co_stimulation_APC_Rooney_et_al	C1	Rest	0.999442	0.87	0.896633		two.sided	BH
Co_stimulation_APC_Rooney_et_al	C2	Rest	1.0079	0.00098	0.00258209	**	two.sided	BH
Co_stimulation_APC_Rooney_et_al	C3	Rest	0.991363	0.00064	0.00174703	**	two.sided	BH
Co_stimulation_T_cell_Rooney_et_al	C1	Rest	1.00286	0.57	0.654205		two.sided	BH
Co_stimulation_T_cell_Rooney_et_al	C2	Rest	1.00135	0.63	0.701801		two.sided	BH
Co_stimulation_T_cell_Rooney_et_al	C3	Rest	0.995142	0.26	0.331008		two.sided	BH
Co_inhibition_APC_Rooney_et_al	C1	Rest	0.989043	0.01	0.0190566	*	two.sided	BH
Co_inhibition_APC_Rooney_et_al	C2	Rest	1.01928	1e-05	3.6506e-05	****	two.sided	BH
Co_inhibition_APC_Rooney_et_al	C3	Rest	0.990065	0.04	0.0658696	.	two.sided	BH
Co_inhibition_T_cell_Rooney_et_al	C1	Rest	1.00021	0.84	0.874639		two.sided	BH
Co_inhibition_T_cell_Rooney_et_al	C2	Rest	1.00518	0.15	0.208486		two.sided	BH
Co_inhibition_T_cell_Rooney_et_al	C3	Rest	0.99366	0.18	0.243482		two.sided	BH
Type_I_IFN_Reponse_Rooney_et_al	C1	Rest	0.994343	0.18	0.243482		two.sided	BH
Type_I_IFN_Reponse_Rooney_et_al	C2	Rest	1.01387	0.0086	0.0170314	*	two.sided	BH
Type_I_IFN_Reponse_Rooney_et_al	C3	Rest	0.990238	0.15	0.208486		two.sided	BH
MHC_Class_I	C1	Rest	1.00018	0.76	0.802369		two.sided	BH
MHC_Class_I	C2	Rest	1.00287	0.72	0.770883		two.sided	BH
MHC_Class_I	C3	Rest	0.996401	0.48	0.570353		two.sided	BH
MHC_Class_II	C1	Rest	0.98705	0.011	0.0208312	*	two.sided	BH
MHC_Class_II	C2	Rest	1.04214	1.6e-15	1.46909e-14	****	two.sided	BH
MHC_Class_II	C3	Rest	0.966638	2.6e-09	1.40679e-08	****	two.sided	BH
T_cell_inflamed_GEP_Ayers_et_al	C1	Rest	1.00363	0.81	0.84631		two.sided	BH
T_cell_inflamed_GEP_Ayers_et_al	C2	Rest	1.00105	0.57	0.654205		two.sided	BH
T_cell_inflamed_GEP_Ayers_et_al	C3	Rest	0.994614	0.38	0.468049		two.sided	BH
IFNG_signature_Ayers_et_al	C1	Rest	1.01097	0.06	0.0918182	.	two.sided	BH
IFNG_signature_Ayers_et_al	C2	Rest	0.982306	0.0014	0.003535	**	two.sided	BH
IFNG_signature_Ayers_et_al	C3	Rest	1.00867	0.15	0.208486		two.sided	BH
MDSC_Wang_et_al	C1	Rest	0.997724	0.55	0.638506		two.sided	BH
MDSC_Wang_et_al	C2	Rest	1.01407	4.6e-05	0.000153165	***	two.sided	BH
MDSC_Wang_et_al	C3	Rest	0.986163	0.00015	0.000459091	***	two.sided	BH
GPAGs	C1	Rest	0.993379	0.0015	0.00369512	**	two.sided	BH
GPAGs	C2	Rest	1.01787	5.9e-18	6.62111e-17	****	two.sided	BH
GPAGs	C3	Rest	0.986737	2e-09	1.12222e-08	****	two.sided	BH
PPAGs	C1	Rest	0.99963	0.7	0.760215		two.sided	BH
PPAGs	C2	Rest	0.997181	0.012	0.0221707	*	two.sided	BH
PPAGs	C3	Rest	1.00377	0.0016	0.00390968	**	two.sided	BH
HLA_signature_gene	C1	Rest	0.998836	0.63	0.701801		two.sided	BH
HLA_signature_gene	C2	Rest	1.01364	0.00054	0.001515	**	two.sided	BH
HLA_signature_gene	C3	Rest	0.9854	0.0012	0.00308136	**	two.sided	BH
B_cells_Danaher_et_al	C1	Rest	0.999009	0.8	0.838754		two.sided	BH
B_cells_Danaher_et_al	C2	Rest	1.0181	0.01	0.0190566	*	two.sided	BH
B_cells_Danaher_et_al	C3	Rest	0.980091	0.012	0.0221707	*	two.sided	BH
Cytotoxic_cells_Danaher_et_al	C1	Rest	1.00727	0.48	0.570353		two.sided	BH
Cytotoxic_cells_Danaher_et_al	C2	Rest	0.987185	0.16	0.220364		two.sided	BH
Cytotoxic_cells_Danaher_et_al	C3	Rest	1.00699	0.43	0.519084		two.sided	BH
Mast_cells_Danaher_et_al	C1	Rest	0.967744	0.00061	0.00169569	**	two.sided	BH
Mast_cells_Danaher_et_al	C2	Rest	1.08114	1.6e-18	1.86462e-17	****	two.sided	BH
Mast_cells_Danaher_et_al	C3	Rest	0.946686	4e-09	2.05424e-08	****	two.sided	BH
Neutrophils_Danaher_et_al	C1	Rest	1.0001	0.93	0.933079		two.sided	BH
Neutrophils_Danaher_et_al	C2	Rest	1.00918	0.039	0.0645738	.	two.sided	BH
Neutrophils_Danaher_et_al	C3	Rest	0.98912	0.019	0.0342679	*	two.sided	BH
T_cells_Danaher_et_al	C1	Rest	0.999916	0.63	0.701801		two.sided	BH
T_cells_Danaher_et_al	C2	Rest	1.01132	0.025	0.0440407	*	two.sided	BH
T_cells_Danaher_et_al	C3	Rest	0.986847	0.054	0.0861158	.	two.sided	BH
TIP_Release_of_cancer_cell_antigens	C1	Rest	1.00196	0.058	0.0896633	.	two.sided	BH
TIP_Release_of_cancer_cell_antigens	C2	Rest	0.995384	8.4e-06	3.1815e-05	****	two.sided	BH
TIP_Release_of_cancer_cell_antigens	C3	Rest	1.00324	0.0049	0.0101	*	two.sided	BH
TIP_Cancer_antigen_presentation_1	C1	Rest	0.997658	0.18	0.243482		two.sided	BH
TIP_Cancer_antigen_presentation_1	C2	Rest	1.01142	2.9e-09	1.54158e-08	****	two.sided	BH
TIP_Cancer_antigen_presentation_1	C3	Rest	0.9893	5.2e-07	2.28348e-06	****	two.sided	BH
TIP_Priming_and_activation_1	C1	Rest	1.00098	0.99	0.99		two.sided	BH
TIP_Priming_and_activation_1	C2	Rest	1.00537	0.058	0.0896633	.	two.sided	BH
TIP_Priming_and_activation_1	C3	Rest	0.992562	0.037	0.0615989	.	two.sided	BH
TIP_Priming_and_activation_2	C1	Rest	0.999548	0.65	0.716182		two.sided	BH
TIP_Priming_and_activation_2	C2	Rest	1.0077	0.017	0.0308443	*	two.sided	BH
TIP_Priming_and_activation_2	C3	Rest	0.991474	0.034	0.0572333	.	two.sided	BH
TIP_Trafficking_of_immune_cells_to_tumors	C1	Rest	1.00074	0.85	0.87901		two.sided	BH
TIP_Trafficking_of_immune_cells_to_tumors	C2	Rest	1.00585	0.15	0.208486		two.sided	BH
TIP_Trafficking_of_immune_cells_to_tumors	C3	Rest	0.992272	0.075	0.111397		two.sided	BH
TIP_Infiltration_of_immune_cells_into_tumors_1	C1	Rest	0.996462	0.22	0.284872		two.sided	BH
TIP_Infiltration_of_immune_cells_into_tumors_1	C2	Rest	1.00552	0.052	0.0833651	.	two.sided	BH
TIP_Infiltration_of_immune_cells_into_tumors_1	C3	Rest	0.997551	0.42	0.511084		two.sided	BH
TIP_Infiltration_of_immune_cells_into_tumors_2	C1	Rest	1.001	0.56	0.647634		two.sided	BH
TIP_Infiltration_of_immune_cells_into_tumors_2	C2	Rest	0.99277	0.0009	0.00239211	**	two.sided	BH
TIP_Infiltration_of_immune_cells_into_tumors_2	C3	Rest	1.00748	0.0029	0.00655746	**	two.sided	BH
TIP_Recognition_of_cancer_cells_by_T_cells_1	C1	Rest	1.00275	0.28	0.354979		two.sided	BH
TIP_Recognition_of_cancer_cells_by_T_cells_1	C2	Rest	0.993674	0.0081	0.0161467	*	two.sided	BH
TIP_Recognition_of_cancer_cells_by_T_cells_1	C3	Rest	1.00438	0.083	0.122083		two.sided	BH
TIP_Recognition_of_cancer_cells_by_T_cells_2	C1	Rest	1.00028	0.92	0.926113		two.sided	BH
TIP_Recognition_of_cancer_cells_by_T_cells_2	C2	Rest	0.988654	0.0048	0.00996164	**	two.sided	BH
TIP_Recognition_of_cancer_cells_by_T_cells_2	C3	Rest	1.01328	0.0015	0.00369512	**	two.sided	BH
TIP_Killing_of_cancer_cells_2	C1	Rest	1.00473	0.066	0.099	.	two.sided	BH
TIP_Killing_of_cancer_cells_2	C2	Rest	0.996092	0.22	0.284872		two.sided	BH
TIP_Killing_of_cancer_cells_2	C3	Rest	0.999221	0.53	0.617654		two.sided	BH
TLS_Nature	C1	Rest	0.999153	0.92	0.926113		two.sided	BH
TLS_Nature	C2	Rest	1.01832	9.1e-06	3.39951e-05	****	two.sided	BH
TLS_Nature	C3	Rest	0.979681	2.4e-06	9.82703e-06	****	two.sided	BH
TMEscoreA_plus	C1	Rest	1.01243	0.02	0.035858	*	two.sided	BH
TMEscoreA_plus	C2	Rest	0.966361	1.9e-10	1.25152e-09	****	two.sided	BH
TMEscoreA_plus	C3	Rest	1.0267	9.2e-06	3.39951e-05	****	two.sided	BH
TMEscoreB_plus	C1	Rest	0.985506	0.0008	0.00214513	**	two.sided	BH
TMEscoreB_plus	C2	Rest	1.03995	7.9e-25	2.16762e-23	****	two.sided	BH
TMEscoreB_plus	C3	Rest	0.970786	2.8e-14	2.29297e-13	****	two.sided	BH
B_cells_Bindea_et_al	C1	Rest	0.999836	0.67	0.735543		two.sided	BH
B_cells_Bindea_et_al	C2	Rest	1.01138	0.0017	0.0041208	**	two.sided	BH
B_cells_Bindea_et_al	C3	Rest	0.986879	0.0001	0.000318947	***	two.sided	BH
T_cells_Bindea_et_al	C1	Rest	0.997033	0.31	0.389751		two.sided	BH
T_cells_Bindea_et_al	C2	Rest	1.0193	2e-05	7.21429e-05	****	two.sided	BH
T_cells_Bindea_et_al	C3	Rest	0.980953	0.00039	0.00110439	**	two.sided	BH
T_helper_cells_Bindea_et_al	C1	Rest	1.00122	0.2	0.265789		two.sided	BH
T_helper_cells_Bindea_et_al	C2	Rest	0.998421	0.12	0.172322		two.sided	BH
T_helper_cells_Bindea_et_al	C3	Rest	1.00048	0.75	0.797368		two.sided	BH
Tcm_Bindea_et_al	C1	Rest	0.996028	0.026	0.0455376	*	two.sided	BH
Tcm_Bindea_et_al	C2	Rest	1.01121	1.6e-09	9.14717e-09	****	two.sided	BH
Tcm_Bindea_et_al	C3	Rest	0.991396	2.8e-05	9.75172e-05	****	two.sided	BH
Tem_Bindea_et_al	C1	Rest	1.00037	0.53	0.617654		two.sided	BH
Tem_Bindea_et_al	C2	Rest	1.00301	0.19	0.254735		two.sided	BH
Tem_Bindea_et_al	C3	Rest	0.996019	0.035	0.0585912	.	two.sided	BH
Th1_cells_Bindea_et_al	C1	Rest	0.999534	0.76	0.802369		two.sided	BH
Th1_cells_Bindea_et_al	C2	Rest	1.00804	3.6e-05	0.000122562	***	two.sided	BH
Th1_cells_Bindea_et_al	C3	Rest	0.991094	3e-05	0.000103295	***	two.sided	BH
Th2_cells_Bindea_et_al	C1	Rest	1.00614	0.0031	0.00690662	**	two.sided	BH
Th2_cells_Bindea_et_al	C2	Rest	0.978845	7.4e-24	1.60157e-22	****	two.sided	BH
Th2_cells_Bindea_et_al	C3	Rest	1.01847	6.4e-15	5.38667e-14	****	two.sided	BH
TFH_Bindea_et_al	C1	Rest	0.998933	0.5	0.587209		two.sided	BH
TFH_Bindea_et_al	C2	Rest	1.01089	1.8e-08	8.94098e-08	****	two.sided	BH
TFH_Bindea_et_al	C3	Rest	0.988469	6.4e-08	3.03e-07	****	two.sided	BH
CD8_T_cells_Bindea_et_al	C1	Rest	0.997074	0.0025	0.00569549	**	two.sided	BH
CD8_T_cells_Bindea_et_al	C2	Rest	1.0064	9.5e-10	5.53558e-09	****	two.sided	BH
CD8_T_cells_Bindea_et_al	C3	Rest	0.99582	0.00062	0.00170782	**	two.sided	BH
Cytotoxic_cells_Bindea_et_al	C1	Rest	1.00041	0.9	0.918182		two.sided	BH
Cytotoxic_cells_Bindea_et_al	C2	Rest	1.0047	0.065	0.098475	.	two.sided	BH
Cytotoxic_cells_Bindea_et_al	C3	Rest	0.994	0.061	0.0928794	.	two.sided	BH
NK_cells_Bindea_et_al	C1	Rest	0.997717	0.056	0.0879171	.	two.sided	BH
NK_cells_Bindea_et_al	C2	Rest	1.00468	4.6e-05	0.000153165	***	two.sided	BH
NK_cells_Bindea_et_al	C3	Rest	0.997099	0.017	0.0308443	*	two.sided	BH
NK_CD56dim_cells_Bindea_et_al	C1	Rest	1.00132	0.49	0.577704		two.sided	BH
NK_CD56dim_cells_Bindea_et_al	C2	Rest	0.997922	0.4	0.490688		two.sided	BH
NK_CD56dim_cells_Bindea_et_al	C3	Rest	1.00096	0.85	0.87901		two.sided	BH
DC_Bindea_et_al	C1	Rest	0.987735	0.0062	0.012524	*	two.sided	BH
DC_Bindea_et_al	C2	Rest	1.03655	3.7e-17	3.737e-16	****	two.sided	BH
DC_Bindea_et_al	C3	Rest	0.972043	4.5e-10	2.727e-09	****	two.sided	BH
iDC_Bindea_et_al	C1	Rest	0.994348	0.056	0.0879171	.	two.sided	BH
iDC_Bindea_et_al	C2	Rest	1.02267	3.7e-17	3.737e-16	****	two.sided	BH
iDC_Bindea_et_al	C3	Rest	0.980155	1.1e-12	7.575e-12	****	two.sided	BH
Eosinophils_Bindea_et_al	C1	Rest	0.997544	0.032	0.0541676	.	two.sided	BH
Eosinophils_Bindea_et_al	C2	Rest	1.008	2.6e-10	1.60776e-09	****	two.sided	BH
Eosinophils_Bindea_et_al	C3	Rest	0.993406	4.6e-06	1.8584e-05	****	two.sided	BH
Macrophages_Bindea_et_al	C1	Rest	0.997166	0.49	0.577704		two.sided	BH
Macrophages_Bindea_et_al	C2	Rest	1.02317	2.2e-10	1.38875e-09	****	two.sided	BH
Macrophages_Bindea_et_al	C3	Rest	0.976413	6.7e-10	3.98059e-09	****	two.sided	BH
Mast_cells_Bindea_et_al	C1	Rest	0.992207	0.027	0.0470172	*	two.sided	BH
Mast_cells_Bindea_et_al	C2	Rest	1.03199	4.6e-23	8.71125e-22	****	two.sided	BH
Mast_cells_Bindea_et_al	C3	Rest	0.972077	4.6e-17	4.49613e-16	****	two.sided	BH
Neutrophils_Bindea_et_al	C1	Rest	1.00012	0.9	0.918182		two.sided	BH
Neutrophils_Bindea_et_al	C2	Rest	1.01153	8e-06	3.10769e-05	****	two.sided	BH
Neutrophils_Bindea_et_al	C3	Rest	0.986372	5.7e-07	2.46729e-06	****	two.sided	BH
SW480_cancer_cells_Bindea_et_al	C1	Rest	0.998054	0.59	0.674604		two.sided	BH
SW480_cancer_cells_Bindea_et_al	C2	Rest	0.98733	8.4e-06	3.1815e-05	****	two.sided	BH
SW480_cancer_cells_Bindea_et_al	C3	Rest	1.01749	5.8e-08	2.78952e-07	****	two.sided	BH
Normal_mucosa_Bindea_et_al	C1	Rest	0.991002	0.0021	0.00497109	**	two.sided	BH
Normal_mucosa_Bindea_et_al	C2	Rest	1.03283	1.2e-25	4.545e-24	****	two.sided	BH
Normal_mucosa_Bindea_et_al	C3	Rest	0.972491	5.6e-16	5.3025e-15	****	two.sided	BH
Antigen_Processing_and_Presentation_Li_et_al	C1	Rest	1.00016	0.71	0.762872		two.sided	BH
Antigen_Processing_and_Presentation_Li_et_al	C2	Rest	1.00446	0.0096	0.0185274	*	two.sided	BH
Antigen_Processing_and_Presentation_Li_et_al	C3	Rest	0.994554	0.0013	0.00331008	**	two.sided	BH
Antimicrobials_Li_et_al	C1	Rest	0.997996	0.18	0.243482		two.sided	BH
Antimicrobials_Li_et_al	C2	Rest	1.00885	5.8e-09	2.929e-08	****	two.sided	BH
Antimicrobials_Li_et_al	C3	Rest	0.991896	9.9e-07	4.10918e-06	****	two.sided	BH
BCR_Signaling_Pathway_Li_et_al	C1	Rest	0.996997	0.12	0.172322		two.sided	BH
BCR_Signaling_Pathway_Li_et_al	C2	Rest	1.00966	3.5e-07	1.60682e-06	****	two.sided	BH
BCR_Signaling_Pathway_Li_et_al	C3	Rest	0.992094	0.00011	0.000347188	***	two.sided	BH
Chemokines_Li_et_al	C1	Rest	0.997752	0.41	0.500927		two.sided	BH
Chemokines_Li_et_al	C2	Rest	1.00675	0.0051	0.0104412	*	two.sided	BH
Chemokines_Li_et_al	C3	Rest	0.994623	0.031	0.0530678	.	two.sided	BH
Chemokine_Receptors_Li_et_al	C1	Rest	0.995288	0.085	0.12442		two.sided	BH
Chemokine_Receptors_Li_et_al	C2	Rest	1.01545	2.1e-10	1.35383e-09	****	two.sided	BH
Chemokine_Receptors_Li_et_al	C3	Rest	0.987343	4e-07	1.80896e-06	****	two.sided	BH
Cytokines_Li_et_al	C1	Rest	1.00012	0.6	0.683459		two.sided	BH
Cytokines_Li_et_al	C2	Rest	1.00256	0.045	0.0729144	.	two.sided	BH
Cytokines_Li_et_al	C3	Rest	0.996838	0.0061	0.0124047	*	two.sided	BH
Cytokine_Receptors_Li_et_al	C1	Rest	0.99551	0.0034	0.00746522	**	two.sided	BH
Cytokine_Receptors_Li_et_al	C2	Rest	1.01307	3.1e-21	4.6965e-20	****	two.sided	BH
Cytokine_Receptors_Li_et_al	C3	Rest	0.989832	7.9e-13	5.69929e-12	****	two.sided	BH
Interferons_Li_et_al	C1	Rest	1.00131	0.34	0.425702		two.sided	BH
Interferons_Li_et_al	C2	Rest	0.995111	0.00018	0.000534706	***	two.sided	BH
Interferons_Li_et_al	C3	Rest	1.00431	0.0023	0.00527955	**	two.sided	BH
Interleukins_Li_et_al	C1	Rest	0.996463	0.03	0.0516477	.	two.sided	BH
Interleukins_Li_et_al	C2	Rest	1.00815	7.7e-07	3.24042e-06	****	two.sided	BH
Interleukins_Li_et_al	C3	Rest	0.994464	0.0022	0.00512769	**	two.sided	BH
Interleukins_Receptor_Li_et_al	C1	Rest	0.997338	0.12	0.172322		two.sided	BH
Interleukins_Receptor_Li_et_al	C2	Rest	1.00685	0.0011	0.00284872	**	two.sided	BH
Interleukins_Receptor_Li_et_al	C3	Rest	0.994987	0.06	0.0918182	.	two.sided	BH
Natural_Killer_Cell_Cytotoxicity_Li_et_al	C1	Rest	0.998185	0.23	0.296553		two.sided	BH
Natural_Killer_Cell_Cytotoxicity_Li_et_al	C2	Rest	1.00587	0.00014	0.00043732	***	two.sided	BH
Natural_Killer_Cell_Cytotoxicity_Li_et_al	C3	Rest	0.99516	0.0042	0.00902553	**	two.sided	BH
TCR_signaling_Pathway_Li_et_al	C1	Rest	0.998239	0.21	0.276652		two.sided	BH
TCR_signaling_Pathway_Li_et_al	C2	Rest	1.0041	0.0046	0.00961241	**	two.sided	BH
TCR_signaling_Pathway_Li_et_al	C3	Rest	0.997182	0.081	0.119722		two.sided	BH
TGFb_Family_Member_Li_et_al	C1	Rest	0.997296	0.22	0.284872		two.sided	BH
TGFb_Family_Member_Li_et_al	C2	Rest	1.00824	9.2e-05	0.000296553	***	two.sided	BH
TGFb_Family_Member_Li_et_al	C3	Rest	0.993405	0.0033	0.00729854	**	two.sided	BH
TGFb_Family_Member_Receptor_Li_et_al	C1	Rest	0.993052	0.00021	0.000617767	***	two.sided	BH
TGFb_Family_Member_Receptor_Li_et_al	C2	Rest	1.01721	1.3e-19	1.64125e-18	****	two.sided	BH
TGFb_Family_Member_Receptor_Li_et_al	C3	Rest	0.987861	3.7e-09	1.93293e-08	****	two.sided	BH
TNF_Family_Members_Li_et_al	C1	Rest	0.994825	0.051	0.0821968	.	two.sided	BH
TNF_Family_Members_Li_et_al	C2	Rest	1.01848	1.1e-13	8.77105e-13	****	two.sided	BH
TNF_Family_Members_Li_et_al	C3	Rest	0.984384	2.1e-09	1.15691e-08	****	two.sided	BH
TNF_Family_Members_Receptors_Li_et_al	C1	Rest	0.996132	0.11	0.16024		two.sided	BH
TNF_Family_Members_Receptors_Li_et_al	C2	Rest	1.00735	0.0036	0.00784748	**	two.sided	BH
TNF_Family_Members_Receptors_Li_et_al	C3	Rest	0.995777	0.14	0.198224		two.sided	BH
T_cell_accumulation_Peng_et_al	C1	Rest	0.998116	0.38	0.468049		two.sided	BH
T_cell_accumulation_Peng_et_al	C2	Rest	1.00903	5.5e-06	2.19276e-05	****	two.sided	BH
T_cell_accumulation_Peng_et_al	C3	Rest	0.991549	6.5e-05	0.000211774	***	two.sided	BH
T_cell_exhaustion_Peng_et_al	C1	Rest	0.998194	0.21	0.276652		two.sided	BH
T_cell_exhaustion_Peng_et_al	C2	Rest	1.00774	7.1e-06	2.7939e-05	****	two.sided	BH
T_cell_exhaustion_Peng_et_al	C3	Rest	0.99297	0.00039	0.00110439	**	two.sided	BH
T_cell_regulatory_Peng_et_al	C1	Rest	0.99731	0.2	0.265789		two.sided	BH
T_cell_regulatory_Peng_et_al	C2	Rest	1.00895	6e-07	2.56056e-06	****	two.sided	BH
T_cell_regulatory_Peng_et_al	C3	Rest	0.99256	4.9e-05	0.00016138	***	two.sided	BH
ICB_resistance_Peng_et_al	C1	Rest	0.997041	0.71	0.762872		two.sided	BH
ICB_resistance_Peng_et_al	C2	Rest	1.01709	2.4e-05	8.55529e-05	****	two.sided	BH
ICB_resistance_Peng_et_al	C3	Rest	0.983474	2.7e-05	9.51279e-05	****	two.sided	BH
MDSC_Peng_et_al	C1	Rest	1.0087	0.003	0.00673333	**	two.sided	BH
MDSC_Peng_et_al	C2	Rest	0.973812	5.8e-20	7.64087e-19	****	two.sided	BH
MDSC_Peng_et_al	C3	Rest	1.02172	1.3e-11	8.75333e-11	****	two.sided	BH
TAM_Peng_et_al	C1	Rest	0.995029	0.0089	0.0173981	*	two.sided	BH
TAM_Peng_et_al	C2	Rest	1.01956	5.1e-23	9.09e-22	****	two.sided	BH
TAM_Peng_et_al	C3	Rest	0.982921	1.9e-15	1.69324e-14	****	two.sided	BH
CAF_Peng_et_al	C1	Rest	1.00212	0.24	0.306835		two.sided	BH
CAF_Peng_et_al	C2	Rest	0.999885	0.73	0.778838		two.sided	BH
CAF_Peng_et_al	C3	Rest	0.997708	0.38	0.468049		two.sided	BH
T_cell_probe_Jeschke_et_al	C1	Rest	0.996789	0.13	0.18493		two.sided	BH
T_cell_probe_Jeschke_et_al	C2	Rest	1.0085	0.0038	0.00822429	**	two.sided	BH
T_cell_probe_Jeschke_et_al	C3	Rest	0.993686	0.13	0.18493		two.sided	BH
MeTIL_Jeschke_et_al	C1	Rest	0.992709	0.045	0.0729144	.	two.sided	BH
MeTIL_Jeschke_et_al	C2	Rest	1.01317	0.0022	0.00512769	**	two.sided	BH
MeTIL_Jeschke_et_al	C3	Rest	0.992923	0.24	0.306835		two.sided	BH
TMEscore_CIR	C1	Rest	1.01282	0.021	0.0374294	*	two.sided	BH
TMEscore_CIR	C2	Rest	0.955165	6.6e-19	7.9992e-18	****	two.sided	BH
TMEscore_CIR	C3	Rest	1.04051	6.7e-13	4.95146e-12	****	two.sided	BH
TMEscore_plus	C1	Rest	1.02732	0.00017	0.00051	***	two.sided	BH
TMEscore_plus	C2	Rest	0.929236	9.3e-25	2.16762e-23	****	two.sided	BH
TMEscore_plus	C3	Rest	1.0576	8.9e-13	6.2714e-12	****	two.sided	BH
