# Supplementary material for: A novel methionine metabolism-related signature predicts prognosis and immunotherapy response in lung adenocarcinoma
Source: Aging (Albany NY). 2023 May 2;15(9):3498–523. doi: 10.18632/aging.204687 (PMC10449287; doi:10.18632/aging.204687)
Supplement: Supplementary Table 8 [file aging-15-204687-s008.xlsx]

## Sheet: Table S8
Supplementary Table 8. The differences of a list of immune cells among three MRG modification patterns.
Immune cells	Group1	Group2	FC	p	FDR	signifCode	alternative	adj.method
B_cells_naive_CIBERSORT	C1	Rest	1.00102	0.49	0.609512		two.sided	BH
B_cells_naive_CIBERSORT	C2	Rest	0.999964	0.7	0.782466		two.sided	BH
B_cells_naive_CIBERSORT	C3	Rest	0.998878	0.76	0.835795		two.sided	BH
B_cells_memory_CIBERSORT	C1	Rest	0.99181	0.00072	0.00235008	**	two.sided	BH
B_cells_memory_CIBERSORT	C2	Rest	1.01511	6.8e-09	6.30545e-08	****	two.sided	BH
B_cells_memory_CIBERSORT	C3	Rest	0.991711	0.0072	0.0178036	*	two.sided	BH
Plasma_cells_CIBERSORT	C1	Rest	1.01226	0.0099	0.0234483	*	two.sided	BH
Plasma_cells_CIBERSORT	C2	Rest	0.986508	0.0086	0.0210108	*	two.sided	BH
Plasma_cells_CIBERSORT	C3	Rest	1.00212	0.92	0.93606		two.sided	BH
T_cells_CD8_CIBERSORT	C1	Rest	1.00317	0.89	0.921624		two.sided	BH
T_cells_CD8_CIBERSORT	C2	Rest	0.991549	0.16	0.253023		two.sided	BH
T_cells_CD8_CIBERSORT	C3	Rest	1.00645	0.093	0.164974		two.sided	BH
T_cells_CD4_naive_CIBERSORT	C1	Rest	1	#NUM!	#NUM!		two.sided	BH
T_cells_CD4_naive_CIBERSORT	C2	Rest	1	#NUM!	#NUM!		two.sided	BH
T_cells_CD4_naive_CIBERSORT	C3	Rest	1	#NUM!	#NUM!		two.sided	BH
T_cells_CD4_memory_resting_CIBERSORT	C1	Rest	0.987782	0.01	0.0234483	*	two.sided	BH
T_cells_CD4_memory_resting_CIBERSORT	C2	Rest	1.0182	2.7e-05	0.000121055	***	two.sided	BH
T_cells_CD4_memory_resting_CIBERSORT	C3	Rest	0.992772	0.07	0.129818		two.sided	BH
T_cells_CD4_memory_activated_CIBERSORT	C1	Rest	1.00039	0.67	0.763575		two.sided	BH
T_cells_CD4_memory_activated_CIBERSORT	C2	Rest	0.99697	0.00015	0.000571963	***	two.sided	BH
T_cells_CD4_memory_activated_CIBERSORT	C3	Rest	1.00315	0.00024	0.000882162	***	two.sided	BH
T_cells_follicular_helper_CIBERSORT	C1	Rest	1.00149	0.68	0.766409		two.sided	BH
T_cells_follicular_helper_CIBERSORT	C2	Rest	0.989987	0.0003	0.00108319	**	two.sided	BH
T_cells_follicular_helper_CIBERSORT	C3	Rest	1.01026	0.00049	0.001666	**	two.sided	BH
T_cells_regulatory_(Tregs)_CIBERSORT	C1	Rest	1.00349	0.017	0.0381099	*	two.sided	BH
T_cells_regulatory_(Tregs)_CIBERSORT	C2	Rest	0.994359	0.00039	0.00136	**	two.sided	BH
T_cells_regulatory_(Tregs)_CIBERSORT	C3	Rest	1.00271	0.19	0.290337		two.sided	BH
T_cells_gamma_delta_CIBERSORT	C1	Rest	0.999536	0.073	0.134162		two.sided	BH
T_cells_gamma_delta_CIBERSORT	C2	Rest	1.00066	0.018	0.0401311	*	two.sided	BH
T_cells_gamma_delta_CIBERSORT	C3	Rest	0.999751	0.51	0.62864		two.sided	BH
NK_cells_resting_CIBERSORT	C1	Rest	0.998916	0.61	0.711086		two.sided	BH
NK_cells_resting_CIBERSORT	C2	Rest	0.996157	0.024	0.051	.	two.sided	BH
NK_cells_resting_CIBERSORT	C3	Rest	1.00582	0.0027	0.00775775	**	two.sided	BH
NK_cells_activated_CIBERSORT	C1	Rest	1.00019	0.65	0.749153		two.sided	BH
NK_cells_activated_CIBERSORT	C2	Rest	0.998699	0.18	0.278182		two.sided	BH
NK_cells_activated_CIBERSORT	C3	Rest	1.00133	0.34	0.4624		two.sided	BH
Monocytes_CIBERSORT	C1	Rest	0.997518	0.058	0.111623		two.sided	BH
Monocytes_CIBERSORT	C2	Rest	1.0071	7.5e-06	3.73171e-05	****	two.sided	BH
Monocytes_CIBERSORT	C3	Rest	0.994488	0.0044	0.0117333	*	two.sided	BH
Macrophages_M0_CIBERSORT	C1	Rest	1.02156	0.0051	0.0132535	*	two.sided	BH
Macrophages_M0_CIBERSORT	C2	Rest	0.965027	3e-08	2.30943e-07	****	two.sided	BH
Macrophages_M0_CIBERSORT	C3	Rest	1.01785	0.0025	0.00723404	**	two.sided	BH
Macrophages_M1_CIBERSORT	C1	Rest	1.00616	0.046	0.089799	.	two.sided	BH
Macrophages_M1_CIBERSORT	C2	Rest	0.988192	3.9e-05	0.000162367	***	two.sided	BH
Macrophages_M1_CIBERSORT	C3	Rest	1.00705	0.019	0.0416774	*	two.sided	BH
Macrophages_M2_CIBERSORT	C1	Rest	0.98828	0.013	0.0299661	*	two.sided	BH
Macrophages_M2_CIBERSORT	C2	Rest	1.02339	8e-06	3.93253e-05	****	two.sided	BH
Macrophages_M2_CIBERSORT	C3	Rest	0.986234	0.028	0.0582857	.	two.sided	BH
Dendritic_cells_resting_CIBERSORT	C1	Rest	0.993818	0.0031	0.00866301	**	two.sided	BH
Dendritic_cells_resting_CIBERSORT	C2	Rest	1.0145	2.1e-12	3.4272e-11	****	two.sided	BH
Dendritic_cells_resting_CIBERSORT	C3	Rest	0.99011	7.2e-06	3.62667e-05	****	two.sided	BH
Dendritic_cells_activated_CIBERSORT	C1	Rest	1.00025	0.079	0.144538		two.sided	BH
Dendritic_cells_activated_CIBERSORT	C2	Rest	0.99957	0.019	0.0416774	*	two.sided	BH
Dendritic_cells_activated_CIBERSORT	C3	Rest	1.00023	0.49	0.609512		two.sided	BH
Mast_cells_resting_CIBERSORT	C1	Rest	0.994006	0.035	0.0710448	.	two.sided	BH
Mast_cells_resting_CIBERSORT	C2	Rest	1.01617	8.8e-10	9.97333e-09	****	two.sided	BH
Mast_cells_resting_CIBERSORT	C3	Rest	0.987968	1.1e-05	5.34286e-05	****	two.sided	BH
Mast_cells_activated_CIBERSORT	C1	Rest	0.999534	0.32	0.442576		two.sided	BH
Mast_cells_activated_CIBERSORT	C2	Rest	0.999616	0.3	0.420619		two.sided	BH
Mast_cells_activated_CIBERSORT	C3	Rest	1.00099	0.028	0.0582857	.	two.sided	BH
Eosinophils_CIBERSORT	C1	Rest	0.999987	0.83	0.893509		two.sided	BH
Eosinophils_CIBERSORT	C2	Rest	1.00002	0.57	0.676047		two.sided	BH
Eosinophils_CIBERSORT	C3	Rest	0.999996	0.7	0.782466		two.sided	BH
Neutrophils_CIBERSORT	C1	Rest	0.999396	0.85	0.898446		two.sided	BH
Neutrophils_CIBERSORT	C2	Rest	0.999967	0.65	0.749153		two.sided	BH
Neutrophils_CIBERSORT	C3	Rest	1.00073	0.76	0.835795		two.sided	BH
P-value_CIBERSORT	C1	Rest	0.989382	0.45	0.575549		two.sided	BH
P-value_CIBERSORT	C2	Rest	0.987804	0.54	0.648		two.sided	BH
P-value_CIBERSORT	C3	Rest	1.02714	0.14	0.225771		two.sided	BH
Correlation_CIBERSORT	C1	Rest	1.00732	0.45	0.575549		two.sided	BH
Correlation_CIBERSORT	C2	Rest	1.00372	0.5	0.620061		two.sided	BH
Correlation_CIBERSORT	C3	Rest	0.987316	0.12	0.200656		two.sided	BH
RMSE_CIBERSORT	C1	Rest	0.998068	0.8	0.868085		two.sided	BH
RMSE_CIBERSORT	C2	Rest	0.995819	0.11	0.186224		two.sided	BH
RMSE_CIBERSORT	C3	Rest	1.00721	0.043	0.0847536	.	two.sided	BH
T_cells_MCPcounter	C1	Rest	0.999188	0.9	0.927273		two.sided	BH
T_cells_MCPcounter	C2	Rest	1.20262	0.0053	0.0136	*	two.sided	BH
T_cells_MCPcounter	C3	Rest	0.804458	0.0038	0.0102675	*	two.sided	BH
CD8_T_cells_MCPcounter	C1	Rest	1.05303	0.67	0.763575		two.sided	BH
CD8_T_cells_MCPcounter	C2	Rest	0.840801	0.097	0.170586		two.sided	BH
CD8_T_cells_MCPcounter	C3	Rest	1.15731	0.18	0.278182		two.sided	BH
Cytotoxic_lymphocytes_MCPcounter	C1	Rest	1.02608	0.87	0.910154		two.sided	BH
Cytotoxic_lymphocytes_MCPcounter	C2	Rest	0.968195	0.81	0.876605		two.sided	BH
Cytotoxic_lymphocytes_MCPcounter	C3	Rest	1.00878	0.93	0.943881		two.sided	BH
B_lineage_MCPcounter	C1	Rest	0.987939	0.89	0.921624		two.sided	BH
B_lineage_MCPcounter	C2	Rest	1.54692	3.5e-05	0.000151915	***	two.sided	BH
B_lineage_MCPcounter	C3	Rest	0.604851	1.4e-05	6.64186e-05	****	two.sided	BH
NK_cells_MCPcounter	C1	Rest	1.03105	0.84	0.89483		two.sided	BH
NK_cells_MCPcounter	C2	Rest	0.947974	0.54	0.648		two.sided	BH
NK_cells_MCPcounter	C3	Rest	1.0286	0.65	0.749153		two.sided	BH
Monocytic_lineage_MCPcounter	C1	Rest	1.04886	0.33	0.451812		two.sided	BH
Monocytic_lineage_MCPcounter	C2	Rest	1.10229	0.087	0.155684		two.sided	BH
Monocytic_lineage_MCPcounter	C3	Rest	0.843614	0.0035	0.00952	**	two.sided	BH
Myeloid_dendritic_cells_MCPcounter	C1	Rest	0.753116	0.0055	0.0139379	*	two.sided	BH
Myeloid_dendritic_cells_MCPcounter	C2	Rest	2.60361	2.1e-21	1.428e-19	****	two.sided	BH
Myeloid_dendritic_cells_MCPcounter	C3	Rest	0.445721	1.8e-13	3.86526e-12	****	two.sided	BH
Neutrophils_MCPcounter	C1	Rest	1.01158	0.95	0.95468		two.sided	BH
Neutrophils_MCPcounter	C2	Rest	1.28031	3.8e-09	3.78146e-08	****	two.sided	BH
Neutrophils_MCPcounter	C3	Rest	0.736486	2.1e-10	2.6775e-09	****	two.sided	BH
Endothelial_cells_MCPcounter	C1	Rest	0.889951	0.062	0.116571		two.sided	BH
Endothelial_cells_MCPcounter	C2	Rest	1.53417	2.3e-19	1.173e-17	****	two.sided	BH
Endothelial_cells_MCPcounter	C3	Rest	0.688563	6.6e-15	1.7952e-13	****	two.sided	BH
Fibroblasts_MCPcounter	C1	Rest	1.04701	0.26	0.377509		two.sided	BH
Fibroblasts_MCPcounter	C2	Rest	0.939239	0.24	0.349714		two.sided	BH
Fibroblasts_MCPcounter	C3	Rest	1.02177	0.95	0.95468		two.sided	BH
aDC_xCell	C1	Rest	1.0027	0.89	0.921624		two.sided	BH
aDC_xCell	C2	Rest	1.02423	0.0068	0.0169171	*	two.sided	BH
aDC_xCell	C3	Rest	0.969045	0.002	0.00591304	**	two.sided	BH
Adipocytes_xCell	C1	Rest	0.999587	0.49	0.609512		two.sided	BH
Adipocytes_xCell	C2	Rest	1.0031	1.1e-09	1.18105e-08	****	two.sided	BH
Adipocytes_xCell	C3	Rest	0.996812	3.7e-09	3.774e-08	****	two.sided	BH
Astrocytes_xCell	C1	Rest	1.0039	0.4	0.524759		two.sided	BH
Astrocytes_xCell	C2	Rest	0.994612	0.47	0.593684		two.sided	BH
Astrocytes_xCell	C3	Rest	1.00194	0.91	0.932864		two.sided	BH
B-cells_xCell	C1	Rest	1.00048	0.8	0.868085		two.sided	BH
B-cells_xCell	C2	Rest	1.01	0.73	0.809348		two.sided	BH
B-cells_xCell	C3	Rest	0.987742	0.92	0.93606		two.sided	BH
Basophils_xCell	C1	Rest	1.00233	0.35	0.469737		two.sided	BH
Basophils_xCell	C2	Rest	0.986887	7.6e-09	6.89067e-08	****	two.sided	BH
Basophils_xCell	C3	Rest	1.01305	1.3e-07	8.55484e-07	****	two.sided	BH
CD4+_memory_T-cells_xCell	C1	Rest	0.999661	0.57	0.676047		two.sided	BH
CD4+_memory_T-cells_xCell	C2	Rest	0.99999	0.15	0.24		two.sided	BH
CD4+_memory_T-cells_xCell	C3	Rest	1.0004	0.031	0.0638788	.	two.sided	BH
CD4+_naive_T-cells_xCell	C1	Rest	1.00022	0.11	0.186224		two.sided	BH
CD4+_naive_T-cells_xCell	C2	Rest	1.00529	6.1e-07	3.60696e-06	****	two.sided	BH
CD4+_naive_T-cells_xCell	C3	Rest	0.993518	0.00021	0.000786055	***	two.sided	BH
CD4+_T-cells_xCell	C1	Rest	1.00006	0.24	0.349714		two.sided	BH
CD4+_T-cells_xCell	C2	Rest	1.00017	0.24	0.349714		two.sided	BH
CD4+_T-cells_xCell	C3	Rest	0.999734	0.98	0.982408		two.sided	BH
CD4+_Tcm_xCell	C1	Rest	0.997025	0.017	0.0381099	*	two.sided	BH
CD4+_Tcm_xCell	C2	Rest	1.00568	4.6e-05	0.00018768	***	two.sided	BH
CD4+_Tcm_xCell	C3	Rest	0.996719	0.061	0.116299		two.sided	BH
CD4+_Tem_xCell	C1	Rest	0.999349	0.033	0.06732	.	two.sided	BH
CD4+_Tem_xCell	C2	Rest	1.00187	6e-05	0.000242376	***	two.sided	BH
CD4+_Tem_xCell	C3	Rest	0.998537	0.037	0.0747327	.	two.sided	BH
CD8+_naive_T-cells_xCell	C1	Rest	1.00072	0.012	0.0278182	*	two.sided	BH
CD8+_naive_T-cells_xCell	C2	Rest	0.998224	1.9e-08	1.615e-07	****	two.sided	BH
CD8+_naive_T-cells_xCell	C3	Rest	1.00128	0.00059	0.00198942	**	two.sided	BH
CD8+_T-cells_xCell	C1	Rest	1.00246	0.88	0.918261		two.sided	BH
CD8+_T-cells_xCell	C2	Rest	0.998629	0.6	0.703448		two.sided	BH
CD8+_T-cells_xCell	C3	Rest	0.99881	0.46	0.5865		two.sided	BH
CD8+_Tcm_xCell	C1	Rest	1.00276	0.9	0.927273		two.sided	BH
CD8+_Tcm_xCell	C2	Rest	1.00011	0.34	0.4624		two.sided	BH
CD8+_Tcm_xCell	C3	Rest	0.996708	0.24	0.349714		two.sided	BH
CD8+_Tem_xCell	C1	Rest	1.00164	0.045	0.0882692	.	two.sided	BH
CD8+_Tem_xCell	C2	Rest	0.998005	0.019	0.0416774	*	two.sided	BH
CD8+_Tem_xCell	C3	Rest	1.00049	0.69	0.775537		two.sided	BH
cDC_xCell	C1	Rest	0.976557	0.00068	0.00223742	**	two.sided	BH
cDC_xCell	C2	Rest	1.05317	3.6e-19	1.632e-17	****	two.sided	BH
cDC_xCell	C3	Rest	0.966434	1.1e-09	1.18105e-08	****	two.sided	BH
Chondrocytes_xCell	C1	Rest	0.999337	0.87	0.910154		two.sided	BH
Chondrocytes_xCell	C2	Rest	1.01311	1.2e-08	1.0417e-07	****	two.sided	BH
Chondrocytes_xCell	C3	Rest	0.985443	1.6e-09	1.67385e-08	****	two.sided	BH
Class-switched_memory_B-cells_xCell	C1	Rest	0.996304	0.13	0.214737		two.sided	BH
Class-switched_memory_B-cells_xCell	C2	Rest	1.01183	1.6e-05	7.41818e-05	****	two.sided	BH
Class-switched_memory_B-cells_xCell	C3	Rest	0.990369	0.002	0.00591304	**	two.sided	BH
CLP_xCell	C1	Rest	1.00448	0.17	0.265747		two.sided	BH
CLP_xCell	C2	Rest	0.987734	3.2e-08	2.41778e-07	****	two.sided	BH
CLP_xCell	C3	Rest	1.00953	5.1e-06	2.63392e-05	****	two.sided	BH
CMP_xCell	C1	Rest	0.999344	0.11	0.186224		two.sided	BH
CMP_xCell	C2	Rest	1.00125	0.0035	0.00952	**	two.sided	BH
CMP_xCell	C3	Rest	0.999271	0.14	0.225771		two.sided	BH
DC_xCell	C1	Rest	0.992769	0.0012	0.00365373	**	two.sided	BH
DC_xCell	C2	Rest	1.01574	2.6e-16	1.0608e-14	****	two.sided	BH
DC_xCell	C3	Rest	0.989885	5.4e-08	3.74e-07	****	two.sided	BH
Endothelial_cells_xCell	C1	Rest	0.992609	0.19	0.290337		two.sided	BH
Endothelial_cells_xCell	C2	Rest	1.01983	2.6e-08	2.08e-07	****	two.sided	BH
Endothelial_cells_xCell	C3	Rest	0.985363	3.5e-06	1.85455e-05	****	two.sided	BH
Eosinophils_xCell	C1	Rest	0.999113	0.021	0.0458182	*	two.sided	BH
Eosinophils_xCell	C2	Rest	1.00183	3.6e-08	2.67055e-07	****	two.sided	BH
Eosinophils_xCell	C3	Rest	0.998853	0.00043	0.00147429	**	two.sided	BH
Epithelial_cells_xCell	C1	Rest	0.988078	0.0054	0.01377	*	two.sided	BH
Epithelial_cells_xCell	C2	Rest	1.01062	0.084	0.15232		two.sided	BH
Epithelial_cells_xCell	C3	Rest	1.00125	0.27	0.386526		two.sided	BH
Erythrocytes_xCell	C1	Rest	1.00002	0.11	0.186224		two.sided	BH
Erythrocytes_xCell	C2	Rest	0.999985	4.1e-07	2.53455e-06	****	two.sided	BH
Erythrocytes_xCell	C3	Rest	1	0.00016	0.000604444	***	two.sided	BH
Fibroblasts_xCell	C1	Rest	0.987965	0.022	0.0472421	*	two.sided	BH
Fibroblasts_xCell	C2	Rest	1.0401	7.5e-16	2.55e-14	****	two.sided	BH
Fibroblasts_xCell	C3	Rest	0.967851	2.8e-10	3.36e-09	****	two.sided	BH
GMP_xCell	C1	Rest	0.998738	0.00091	0.002856	**	two.sided	BH
GMP_xCell	C2	Rest	1.00355	4.2e-09	3.98512e-08	****	two.sided	BH
GMP_xCell	C3	Rest	0.997254	0.0045	0.0119221	*	two.sided	BH
Hepatocytes_xCell	C1	Rest	1.0003	0.44	0.566309		two.sided	BH
Hepatocytes_xCell	C2	Rest	1.00072	5.5e-06	2.805e-05	****	two.sided	BH
Hepatocytes_xCell	C3	Rest	0.998804	3.7e-05	0.000155629	***	two.sided	BH
HSC_xCell	C1	Rest	0.978648	0.022	0.0472421	*	two.sided	BH
HSC_xCell	C2	Rest	1.09004	2.2e-28	4.488e-26	****	two.sided	BH
HSC_xCell	C3	Rest	0.925569	1.1e-21	8.976e-20	****	two.sided	BH
iDC_xCell	C1	Rest	0.955826	0.0011	0.00337444	**	two.sided	BH
iDC_xCell	C2	Rest	1.08035	7.8e-11	1.0608e-09	****	two.sided	BH
iDC_xCell	C3	Rest	0.961075	0.00033	0.00116069	**	two.sided	BH
Keratinocytes_xCell	C1	Rest	0.995868	0.0098	0.0233825	*	two.sided	BH
Keratinocytes_xCell	C2	Rest	0.999645	0.84	0.89483		two.sided	BH
Keratinocytes_xCell	C3	Rest	1.00518	0.011	0.0256457	*	two.sided	BH
ly_Endothelial_cells_xCell	C1	Rest	0.995491	0.022	0.0472421	*	two.sided	BH
ly_Endothelial_cells_xCell	C2	Rest	1.01022	9.3e-12	1.45938e-10	****	two.sided	BH
ly_Endothelial_cells_xCell	C3	Rest	0.993167	6.9e-07	3.91e-06	****	two.sided	BH
Macrophages_xCell	C1	Rest	1.00361	0.2	0.303346		two.sided	BH
Macrophages_xCell	C2	Rest	1.00551	0.14	0.225771		two.sided	BH
Macrophages_xCell	C3	Rest	0.989412	0.003	0.00844138	**	two.sided	BH
Macrophages_M1_xCell	C1	Rest	1.00414	0.071	0.131077		two.sided	BH
Macrophages_M1_xCell	C2	Rest	0.997774	0.44	0.566309		two.sided	BH
Macrophages_M1_xCell	C3	Rest	0.997898	0.27	0.386526		two.sided	BH
Macrophages_M2_xCell	C1	Rest	0.99778	0.52	0.633313		two.sided	BH
Macrophages_M2_xCell	C2	Rest	1.01166	2.4e-10	2.96727e-09	****	two.sided	BH
Macrophages_M2_xCell	C3	Rest	0.988882	3.3e-14	7.92e-13	****	two.sided	BH
Mast_cells_xCell	C1	Rest	0.99795	0.0034	0.00937297	**	two.sided	BH
Mast_cells_xCell	C2	Rest	1.00311	2.1e-06	1.1424e-05	****	two.sided	BH
Mast_cells_xCell	C3	Rest	0.998682	0.043	0.0847536	.	two.sided	BH
Megakaryocytes_xCell	C1	Rest	0.998991	0.00075	0.00242857	**	two.sided	BH
Megakaryocytes_xCell	C2	Rest	1.00243	7e-23	7.14e-21	****	two.sided	BH
Megakaryocytes_xCell	C3	Rest	0.998288	1.2e-12	2.33143e-11	****	two.sided	BH
Melanocytes_xCell	C1	Rest	1.00076	0.0011	0.00337444	**	two.sided	BH
Melanocytes_xCell	C2	Rest	0.999986	0.22	0.328791		two.sided	BH
Melanocytes_xCell	C3	Rest	0.999145	1.4e-06	7.71892e-06	****	two.sided	BH
Memory_B-cells_xCell	C1	Rest	0.999805	0.063	0.117908		two.sided	BH
Memory_B-cells_xCell	C2	Rest	1.0031	0.95	0.95468		two.sided	BH
Memory_B-cells_xCell	C3	Rest	0.996566	0.054	0.104914		two.sided	BH
MEP_xCell	C1	Rest	1.00122	0.37	0.494951		two.sided	BH
MEP_xCell	C2	Rest	0.990095	1.8e-12	3.06e-11	****	two.sided	BH
MEP_xCell	C3	Rest	1.01044	2.1e-11	3.06e-10	****	two.sided	BH
Mesangial_cells_xCell	C1	Rest	0.999444	0.47	0.593684		two.sided	BH
Mesangial_cells_xCell	C2	Rest	1.00057	0.17	0.265747		two.sided	BH
Mesangial_cells_xCell	C3	Rest	0.99996	0.48	0.604444		two.sided	BH
Monocytes_xCell	C1	Rest	0.997326	0.16	0.253023		two.sided	BH
Monocytes_xCell	C2	Rest	1.00832	4.4e-05	0.000181333	***	two.sided	BH
Monocytes_xCell	C3	Rest	0.993278	0.0033	0.00915918	**	two.sided	BH
MPP_xCell	C1	Rest	1	0.062	0.116571		two.sided	BH
MPP_xCell	C2	Rest	1	0.85	0.898446		two.sided	BH
MPP_xCell	C3	Rest	1	0.027	0.0570777	.	two.sided	BH
MSC_xCell	C1	Rest	1.01306	0.093	0.164974		two.sided	BH
MSC_xCell	C2	Rest	0.967486	2.4e-05	0.000110022	***	two.sided	BH
MSC_xCell	C3	Rest	1.02456	0.0051	0.0132535	*	two.sided	BH
mv_Endothelial_cells_xCell	C1	Rest	0.996054	0.31	0.431672		two.sided	BH
mv_Endothelial_cells_xCell	C2	Rest	1.00918	0.0004	0.00138305	**	two.sided	BH
mv_Endothelial_cells_xCell	C3	Rest	0.993732	0.0059	0.0147681	*	two.sided	BH
Myocytes_xCell	C1	Rest	0.99957	0.11	0.186224		two.sided	BH
Myocytes_xCell	C2	Rest	1.00192	2.1e-08	1.74857e-07	****	two.sided	BH
Myocytes_xCell	C3	Rest	0.998226	1.2e-05	5.76e-05	****	two.sided	BH
naive_B-cells_xCell	C1	Rest	0.999778	0.6	0.703448		two.sided	BH
naive_B-cells_xCell	C2	Rest	1.00093	0.91	0.932864		two.sided	BH
naive_B-cells_xCell	C3	Rest	0.999155	0.49	0.609512		two.sided	BH
Neurons_xCell	C1	Rest	1.00075	0.52	0.633313		two.sided	BH
Neurons_xCell	C2	Rest	0.999282	3.6e-05	0.000154611	***	two.sided	BH
Neurons_xCell	C3	Rest	0.999994	2.1e-07	1.33875e-06	****	two.sided	BH
Neutrophils_xCell	C1	Rest	0.999985	0.2	0.303346		two.sided	BH
Neutrophils_xCell	C2	Rest	1.00014	0.84	0.89483		two.sided	BH
Neutrophils_xCell	C3	Rest	0.999857	0.11	0.186224		two.sided	BH
NK_cells_xCell	C1	Rest	0.999906	0.92	0.93606		two.sided	BH
NK_cells_xCell	C2	Rest	0.999942	0.27	0.386526		two.sided	BH
NK_cells_xCell	C3	Rest	1.00018	0.19	0.290337		two.sided	BH
NKT_xCell	C1	Rest	0.995384	0.16	0.253023		two.sided	BH
NKT_xCell	C2	Rest	1.0023	0.68	0.766409		two.sided	BH
NKT_xCell	C3	Rest	1.00259	0.29	0.412265		two.sided	BH
Osteoblast_xCell	C1	Rest	1.00146	0.38	0.505016		two.sided	BH
Osteoblast_xCell	C2	Rest	0.993363	0.00066	0.00220721	**	two.sided	BH
Osteoblast_xCell	C3	Rest	1.00624	0.0056	0.0141037	*	two.sided	BH
pDC_xCell	C1	Rest	1.00275	0.55	0.658065		two.sided	BH
pDC_xCell	C2	Rest	0.993931	0.00067	0.00222244	**	two.sided	BH
pDC_xCell	C3	Rest	1.00407	0.0022	0.00645755	**	two.sided	BH
Pericytes_xCell	C1	Rest	1.0022	0.84	0.89483		two.sided	BH
Pericytes_xCell	C2	Rest	0.999671	0.68	0.766409		two.sided	BH
Pericytes_xCell	C3	Rest	0.997872	0.51	0.62864		two.sided	BH
Plasma_cells_xCell	C1	Rest	1.0033	0.0053	0.0136	*	two.sided	BH
Plasma_cells_xCell	C2	Rest	0.995941	0.00013	0.000500377	***	two.sided	BH
Plasma_cells_xCell	C3	Rest	1.00104	0.24	0.349714		two.sided	BH
Platelets_xCell	C1	Rest	0.999976	0.31	0.431672		two.sided	BH
Platelets_xCell	C2	Rest	1.00008	0.29	0.412265		two.sided	BH
Platelets_xCell	C3	Rest	0.999937	0.024	0.051	.	two.sided	BH
Preadipocytes_xCell	C1	Rest	0.99232	0.0081	0.0199084	*	two.sided	BH
Preadipocytes_xCell	C2	Rest	1.01666	1.3e-14	3.315e-13	****	two.sided	BH
Preadipocytes_xCell	C3	Rest	0.989332	2.8e-08	2.19692e-07	****	two.sided	BH
pro_B-cells_xCell	C1	Rest	1.00085	0.18	0.278182		two.sided	BH
pro_B-cells_xCell	C2	Rest	0.995608	7.7e-10	8.976e-09	****	two.sided	BH
pro_B-cells_xCell	C3	Rest	1.00425	1.4e-07	9.06667e-07	****	two.sided	BH
Sebocytes_xCell	C1	Rest	0.998603	0.13	0.214737		two.sided	BH
Sebocytes_xCell	C2	Rest	1.0005	0.062	0.116571		two.sided	BH
Sebocytes_xCell	C3	Rest	1.00102	0.67	0.763575		two.sided	BH
Skeletal_muscle_xCell	C1	Rest	1.00007	0.41	0.536154		two.sided	BH
Skeletal_muscle_xCell	C2	Rest	1.00006	0.096	0.169558		two.sided	BH
Skeletal_muscle_xCell	C3	Rest	0.999838	0.35	0.469737		two.sided	BH
Smooth_muscle_xCell	C1	Rest	1.01194	0.07	0.129818		two.sided	BH
Smooth_muscle_xCell	C2	Rest	0.98153	0.0039	0.0104684	*	two.sided	BH
Smooth_muscle_xCell	C3	Rest	1.0085	0.23	0.342482		two.sided	BH
Tgd_cells_xCell	C1	Rest	1.00047	0.77	0.844516		two.sided	BH
Tgd_cells_xCell	C2	Rest	0.999414	0.043	0.0847536	.	two.sided	BH
Tgd_cells_xCell	C3	Rest	1.00016	0.058	0.111623		two.sided	BH
Th1_cells_xCell	C1	Rest	1.00841	0.003	0.00844138	**	two.sided	BH
Th1_cells_xCell	C2	Rest	0.965431	2.8e-30	1.1424e-27	****	two.sided	BH
Th1_cells_xCell	C3	Rest	1.03257	1.9e-20	1.10743e-18	****	two.sided	BH
Th2_cells_xCell	C1	Rest	1.01826	0.00032	0.0011353	**	two.sided	BH
Th2_cells_xCell	C2	Rest	0.938183	8e-26	1.088e-23	****	two.sided	BH
Th2_cells_xCell	C3	Rest	1.05635	3.5e-14	7.93333e-13	****	two.sided	BH
Tregs_xCell	C1	Rest	0.999694	0.76	0.835795		two.sided	BH
Tregs_xCell	C2	Rest	1.00128	0.043	0.0847536	.	two.sided	BH
Tregs_xCell	C3	Rest	0.998832	0.061	0.116299		two.sided	BH
ImmuneScore_xCell	C1	Rest	0.995755	0.35	0.469737		two.sided	BH
ImmuneScore_xCell	C2	Rest	1.02918	1.6e-05	7.41818e-05	****	two.sided	BH
ImmuneScore_xCell	C3	Rest	0.971235	0.00022	0.000816	***	two.sided	BH
StromaScore_xCell	C1	Rest	0.99008	0.082	0.149357		two.sided	BH
StromaScore_xCell	C2	Rest	1.03151	2.4e-15	6.99429e-14	****	two.sided	BH
StromaScore_xCell	C3	Rest	0.97501	1.4e-11	2.11556e-10	****	two.sided	BH
MicroenvironmentScore_xCell	C1	Rest	0.985876	0.15	0.24		two.sided	BH
MicroenvironmentScore_xCell	C2	Rest	1.06161	3.1e-11	4.36138e-10	****	two.sided	BH
MicroenvironmentScore_xCell	C3	Rest	0.946964	1.2e-08	1.0417e-07	****	two.sided	BH
Bcells_EPIC	C1	Rest	0.999932	0.82	0.885079		two.sided	BH
Bcells_EPIC	C2	Rest	1.00174	0.001	0.0031145	**	two.sided	BH
Bcells_EPIC	C3	Rest	0.998018	0.00089	0.00281488	**	two.sided	BH
CAFs_EPIC	C1	Rest	1.00007	0.14	0.225771		two.sided	BH
CAFs_EPIC	C2	Rest	0.999834	0.0092	0.02208	*	two.sided	BH
CAFs_EPIC	C3	Rest	1.00012	0.21	0.317333		two.sided	BH
CD4_Tcells_EPIC	C1	Rest	0.99814	0.085	0.152775		two.sided	BH
CD4_Tcells_EPIC	C2	Rest	1.00582	2.6e-08	2.08e-07	****	two.sided	BH
CD4_Tcells_EPIC	C3	Rest	0.995275	2.5e-05	0.000113333	***	two.sided	BH
CD8_Tcells_EPIC	C1	Rest	1.00032	0.86	0.906667		two.sided	BH
CD8_Tcells_EPIC	C2	Rest	0.999865	0.94	0.951663		two.sided	BH
CD8_Tcells_EPIC	C3	Rest	0.99979	0.79	0.864129		two.sided	BH
Endothelial_EPIC	C1	Rest	0.998194	0.032	0.065608	.	two.sided	BH
Endothelial_EPIC	C2	Rest	1.00473	1.3e-12	2.41091e-11	****	two.sided	BH
Endothelial_EPIC	C3	Rest	0.996485	5.5e-08	3.74e-07	****	two.sided	BH
Macrophages_EPIC	C1	Rest	0.999997	0.53	0.643571		two.sided	BH
Macrophages_EPIC	C2	Rest	1.00008	0.33	0.451812		two.sided	BH
Macrophages_EPIC	C3	Rest	0.999904	0.085	0.152775		two.sided	BH
NKcells_EPIC	C1	Rest	1	0.72	0.800436		two.sided	BH
NKcells_EPIC	C2	Rest	1	0.35	0.469737		two.sided	BH
NKcells_EPIC	C3	Rest	0.999999	0.52	0.633313		two.sided	BH
otherCells_EPIC	C1	Rest	1.00336	0.11	0.186224		two.sided	BH
otherCells_EPIC	C2	Rest	0.988023	7.7e-08	5.15016e-07	****	two.sided	BH
otherCells_EPIC	C3	Rest	1.01048	3.7e-05	0.000155629	***	two.sided	BH
StromalScore_estimate	C1	Rest	3.85498e-15	0.68	0.766409		two.sided	BH
StromalScore_estimate	C2	Rest	1.02747e+100	6.4e-07	3.67775e-06	****	two.sided	BH
StromalScore_estimate	C3	Rest	1.2155e-102	6.4e-07	3.67775e-06	****	two.sided	BH
ImmuneScore_estimate	C1	Rest	1.9703e-22	0.3	0.420619		two.sided	BH
ImmuneScore_estimate	C2	Rest	4.23383e+111	1.3e-06	7.26575e-06	****	two.sided	BH
ImmuneScore_estimate	C3	Rest	4.92853e-108	3.2e-05	0.000140387	***	two.sided	BH
ESTIMATEScore_estimate	C1	Rest	7.59547e-37	0.39	0.51329		two.sided	BH
ESTIMATEScore_estimate	C2	Rest	4.35014e+211	5.5e-08	3.74e-07	****	two.sided	BH
ESTIMATEScore_estimate	C3	Rest	5.99064e-210	5.7e-07	3.42e-06	****	two.sided	BH
TumorPurity_estimate	C1	Rest	1.00718	0.39	0.51329		two.sided	BH
TumorPurity_estimate	C2	Rest	0.954405	5.5e-08	3.74e-07	****	two.sided	BH
TumorPurity_estimate	C3	Rest	1.04818	5.7e-07	3.42e-06	****	two.sided	BH
B_cell_TIMER	C1	Rest	1.00008	0.17	0.265747		two.sided	BH
B_cell_TIMER	C2	Rest	0.999956	0.44	0.566309		two.sided	BH
B_cell_TIMER	C3	Rest	0.999962	0.54	0.648		two.sided	BH
T_cell_CD4_TIMER	C1	Rest	0.996703	0.039	0.0783842	.	two.sided	BH
T_cell_CD4_TIMER	C2	Rest	1.01168	1.6e-12	2.83826e-11	****	two.sided	BH
T_cell_CD4_TIMER	C3	Rest	0.990088	4.2e-08	3.06e-07	****	two.sided	BH
T_cell_CD8_TIMER	C1	Rest	1.00058	0.58	0.685913		two.sided	BH
T_cell_CD8_TIMER	C2	Rest	1.00355	0.1	0.174359		two.sided	BH
T_cell_CD8_TIMER	C3	Rest	0.995153	0.017	0.0381099	*	two.sided	BH
Neutrophil_TIMER	C1	Rest	0.999279	0.67	0.763575		two.sided	BH
Neutrophil_TIMER	C2	Rest	1.00421	6.6e-05	0.000264	***	two.sided	BH
Neutrophil_TIMER	C3	Rest	0.995864	0.0001	0.000388571	***	two.sided	BH
Macrophage_TIMER	C1	Rest	1.00017	0.99	0.99		two.sided	BH
Macrophage_TIMER	C2	Rest	0.998564	0.3	0.420619		two.sided	BH
Macrophage_TIMER	C3	Rest	1.00151	0.27	0.386526		two.sided	BH
DC_TIMER	C1	Rest	0.997536	0.44	0.566309		two.sided	BH
DC_TIMER	C2	Rest	1.01775	4e-07	2.51077e-06	****	two.sided	BH
DC_TIMER	C3	Rest	0.982148	2.7e-06	1.44947e-05	****	two.sided	BH
B_cells_quantiseq	C1	Rest	0.998356	0.39	0.51329		two.sided	BH
B_cells_quantiseq	C2	Rest	1.00585	9e-05	0.000356505	***	two.sided	BH
B_cells_quantiseq	C3	Rest	0.994994	0.00082	0.00261375	**	two.sided	BH
Macrophages_M1_quantiseq	C1	Rest	0.994173	0.47	0.593684		two.sided	BH
Macrophages_M1_quantiseq	C2	Rest	0.994514	0.38	0.505016		two.sided	BH
Macrophages_M1_quantiseq	C3	Rest	1.01331	0.87	0.910154		two.sided	BH
Macrophages_M2_quantiseq	C1	Rest	0.99647	0.12	0.200656		two.sided	BH
Macrophages_M2_quantiseq	C2	Rest	1.01852	6.1e-16	2.26255e-14	****	two.sided	BH
Macrophages_M2_quantiseq	C3	Rest	0.982477	9.6e-13	1.9584e-11	****	two.sided	BH
Monocytes_quantiseq	C1	Rest	0.998454	0.0028	0.00798881	**	two.sided	BH
Monocytes_quantiseq	C2	Rest	0.999757	0.00078	0.00250583	**	two.sided	BH
Monocytes_quantiseq	C3	Rest	1.00206	0.65	0.749153		two.sided	BH
Neutrophils_quantiseq	C1	Rest	0.989712	0.031	0.0638788	.	two.sided	BH
Neutrophils_quantiseq	C2	Rest	1.03118	1.3e-15	4.08e-14	****	two.sided	BH
Neutrophils_quantiseq	C3	Rest	0.975793	1.8e-10	2.36903e-09	****	two.sided	BH
NK_cells_quantiseq	C1	Rest	0.999751	0.32	0.442576		two.sided	BH
NK_cells_quantiseq	C2	Rest	1.00071	0.017	0.0381099	*	two.sided	BH
NK_cells_quantiseq	C3	Rest	0.99944	0.12	0.200656		two.sided	BH
T_cells_CD4_quantiseq	C1	Rest	0.99901	0.61	0.711086		two.sided	BH
T_cells_CD4_quantiseq	C2	Rest	1.00288	0.56	0.66807		two.sided	BH
T_cells_CD4_quantiseq	C3	Rest	0.997737	0.24	0.349714		two.sided	BH
T_cells_CD8_quantiseq	C1	Rest	1.00244	0.52	0.633313		two.sided	BH
T_cells_CD8_quantiseq	C2	Rest	0.995626	0.13	0.214737		two.sided	BH
T_cells_CD8_quantiseq	C3	Rest	1.0024	0.33	0.451812		two.sided	BH
Tregs_quantiseq	C1	Rest	0.996633	0.3	0.420619		two.sided	BH
Tregs_quantiseq	C2	Rest	1.01294	3.7e-06	1.93538e-05	****	two.sided	BH
Tregs_quantiseq	C3	Rest	0.988711	9.1e-05	0.000357	***	two.sided	BH
Dendritic_cells_quantiseq	C1	Rest	0.998777	0.14	0.225771		two.sided	BH
Dendritic_cells_quantiseq	C2	Rest	0.999057	0.42	0.547476		two.sided	BH
Dendritic_cells_quantiseq	C3	Rest	1.00252	0.014	0.0320899	*	two.sided	BH
Other_quantiseq	C1	Rest	1.02666	0.0089	0.0216143	*	two.sided	BH
Other_quantiseq	C2	Rest	0.941521	4e-09	3.88571e-08	****	two.sided	BH
Other_quantiseq	C3	Rest	1.04204	0.00032	0.0011353	**	two.sided	BH
MHC_IPS	C1	Rest	0.992957	0.59	0.695723		two.sided	BH
MHC_IPS	C2	Rest	1.04889	0.0018	0.0054	**	two.sided	BH
MHC_IPS	C3	Rest	0.952729	0.0048	0.0126348	*	two.sided	BH
EC_IPS	C1	Rest	1.00451	0.54	0.648		two.sided	BH
EC_IPS	C2	Rest	0.997801	0.72	0.800436		two.sided	BH
EC_IPS	C3	Rest	0.997452	0.8	0.868085		two.sided	BH
SC_IPS	C1	Rest	1.00142	0.85	0.898446		two.sided	BH
SC_IPS	C2	Rest	0.970051	0.0091	0.0219692	*	two.sided	BH
SC_IPS	C3	Rest	1.03499	0.0024	0.00699429	**	two.sided	BH
CP_IPS	C1	Rest	0.987046	0.22	0.328791		two.sided	BH
CP_IPS	C2	Rest	1.03113	0.01	0.0234483	*	two.sided	BH
CP_IPS	C3	Rest	0.978876	0.14	0.225771		two.sided	BH
AZ_IPS	C1	Rest	0.985907	0.22	0.328791		two.sided	BH
AZ_IPS	C2	Rest	1.04684	3.2e-05	0.000140387	***	two.sided	BH
AZ_IPS	C3	Rest	0.962772	0.0013	0.00392889	**	two.sided	BH
IPS_IPS	C1	Rest	0.936192	0.1	0.174359		two.sided	BH
IPS_IPS	C2	Rest	1.15162	0.0003	0.00108319	**	two.sided	BH
IPS_IPS	C3	Rest	0.912507	0.028	0.0582857	.	two.sided	BH
